# Supplementary material for: Serum proteomics links suppression of tumor immunity to ancestry and lethal prostate cancer
Source: Research Square preprint supplement (doi:10.21203/rs.3.rs-668276/v1), 2021-07-13
Supplement: Supplementary file 1 [file 48f71e69af0feef1c5a158ed.xlsx]

## Sheet: Sheet1
Supplementary Table 14. Protein levels of 82 proteins cross 2790 individuals measured using Olink Proteomics' Proximal Extension Assay (PEA) technology. The unit of measurement is NPX (Normalized Protein eXpression) which is Olink’s arbitrary unit presented in Log2 scale.
ID	CaseorControl	race	IL8	TNFRSF9	TIE2	CD40L	CD244	EGF	ANG1	IL7	PGF	IL6	MCP1	CRTAM	MCP4	TRAIL	CXCL9	CAIX	ADA	Gal9	VEGFR2	CD40	IL18	GZMH	CXCL1	TNFSF14	TWEAK	PDGFsubunitB	PDCD1	FASLG	MCP2	CCL4	Gal1	PDL1	CD27	HGF	GZMA	HO1	CX3CL1	CD70	TNFRSF12A	CCL23	CD5	CCL3	MMP7	NCR1	DCN	TNFRSF21	TNFRSF4
2	case	African American	15.1746	6.83395	8.90325	10.2533	6.61776	12.4361	11.1911	5.94084	9.4949	6.29753	12.84	5.11871	10.2132	8.68074	8.52651	6.63384	3.88627	9.00764	8.0538	12.8323	10.4443	7.363	11.7356	7.98954	9.49767	12.6811	4.05817	5.9724	9.63269	9.36611	7.78503	6.13719	10.1576	9.46974	6.31596	13.6964	7.40749	4.28175	7.75366	9.81909	6.05268	9.20856	12.7819	3.61198	7.0509	9.42226	4.4959
3	case	African	15.0414	6.7888	10.9981	7.74094	7.30155	12.4744	10.9645	7.02634	8.85621	7.09603	12.0386	5.22973	10.7586	7.06527	9.45972	4.47355	3.48845	9.2456	7.79007	12.7537	9.58499	8.91226	12.7232	8.59165	8.30835	12.5328	4.02956	4.69151	9.23976	11.3583	7.42746	7.24666	9.2363	10.4689	6.42224	9.70484	7.03698	4.69363	6.73447	10.9805	5.97847	12.0812	12.3328	3.21988	6.21539	8.54725	4.1898
4	case	African	9.48501	5.96097	10.6003	8.94506	6.8426	12.6346	11.2136	6.95967	8.46663	4.43047	10.6087	5.40887	10.6247	6.12112	9.04369	5.0639	3.28807	9.01616	7.90885	12.1831	10.0545	6.38703	12.5183	7.32375	8.80066	12.4963	3.30198	5.0388	8.87931	8.03789	8.0153	7.82962	9.45433	9.81022	6.23324	9.90421	7.12578	6.10472	6.43174	10.1235	5.5699	13.8265	12.0323	3.40054	5.43116	8.96424	3.61675
6	case	European American	6.96537	5.94925	8.62535	9.90681	6.4284	11.1417	11.1769	7.53672	8.88167	2.98819	12.238	4.65448	10.1504	7.96189	8.6776	4.9002	3.30374	8.62509	8.05386	11.8354	8.86206	5.16059	11.5419	6.74775	9.83322	12.6023	2.93421	6.69022	9.1947	8.46626	7.49765	5.42463	8.26438	8.77917	5.18551	12.29	7.07371	4.95453	6.69823	12.0455	5.07473	6.76279	12.1867	3.98765	5.32696	8.86489	4.90078
8	control	African	10.5059	6.95191	8.49233	9.74901	7.27363	11.6525	10.9011	6.81862	9.28398	4.38746	11.2797	6.47557	11.8432	8.70216	9.6198	5.16992	4.09266	9.3742	8.12155	12.1448	9.10467	8.11236	12.4806	6.80459	10.0998	12.6039	4.21789	6.47542	10.1365	10.2034	7.87565	5.73681	9.46862	9.40762	6.58978	12.3291	7.32932	5.14217	7.53729	11.4759	6.27039	9.55424	12.5435	3.40681	5.85984	9.10244	4.33024
10	control	African	9.55054	7.12746	8.94144	9.58454	6.93486	12.2552	11.1432	5.72644	9.50237	4.31509	11.3746	6.26573	11.4353	8.62932	7.90128	5.50855	3.93458	9.13682	7.76623	12.7684	9.81032	6.91429	12.9252	6.83145	8.85706	12.6231	4.35926	6.74396	8.74539	9.94954	7.95656	6.34549	9.5244	9.03664	6.28904	11.408	7.81966	5.0078	7.70296	10.6237	6.32443	9.94044	12.7477	3.32123	5.79135	9.34679	5.31239
11	case	African	9.73939	6.57774	8.9544	7.78378	7.44964	13.1055	11.1372	5.74852	9.0786	4.94985	12.0709	6.05717	10.7659	8.55652	8.95687	5.12449	5.45269	10.2702	8.16741	13.2108	9.50828	10.9925	12.2468	8.28273	10.1141	12.7363	4.23353	7.15088	9.72263	8.64724	8.04493	6.2549	9.68465	9.41685	7.61142	12.6589	7.48848	5.24428	6.78665	11.4621	6.88495	7.24258	12.6527	4.29792	5.73267	9.14407	5.0973
12	control	European American	8.70391	6.20646	8.53167	9.60379	6.56306	11.7142	11.3673	6.39925	9.02126	3.5839	12.6358	5.73105	10.9564	8.80794	8.19136	4.94874	3.44642	8.41447	7.82067	11.9343	9.47792	5.89711	10.925	6.40134	10.2682	12.6627	3.19085	6.53131	9.34809	9.69391	7.72623	5.65713	8.38472	9.00769	6.28019	12.7091	7.15005	5.44602	6.50643	11.3995	5.53332	7.69646	12.1776	3.5739	5.61775	9.31925	4.57418
13	case	European American	9.53928	6.42969	8.65491	10.4508	6.70689	12.4584	11.5977	6.86037	8.86839	3.24712	12.5165	5.00426	10.6194	9.04829	7.44344	4.75711	3.03708	8.68897	8.04844	12.6011	9.42773	5.40809	11.9713	8.64622	10.5302	12.6143	3.72741	5.92088	9.17913	7.71995	7.43392	5.68256	8.34909	9.78693	6.03899	12.7863	7.32838	4.47842	6.41451	11.5287	5.24716	6.97677	11.7773	3.27432	5.87711	9.15035	4.8462
14	case	African	9.1368	7.94232	8.51065	8.86018	7.50931	10.9055	11.5118	6.30205	9.65905	4.86374	11.5559	6.63431	10.6845	8.79599	12.0693	5.02387	3.58429	9.33718	7.46126	12.386	10.1364	7.21041	12.692	6.90252	9.59647	12.5627	4.90734	6.92724	8.85642	10.015	7.76164	5.6008	9.29637	9.76224	6.79888	11.8273	7.11034	5.11601	7.48757	11.3808	6.58869	8.78477	12.7519	4.18075	5.70988	9.17794	5.26829
16	control	African	8.64982	7.25245	9.25871	10.135	7.69691	12.156	11.4024	6.88327	8.88003	4.27582	11.3232	7.29541	10.4427	8.62925	9.89195	6.81456	4.25292	9.21173	7.76046	12.5929	9.99102	7.82275	12.5286	7.41829	10.1199	12.6737	4.72277	7.44034	9.60339	10.1988	7.62909	5.99074	9.75634	9.72882	7.31798	12.9039	7.02211	5.33322	7.60547	11.6996	6.56516	8.78784	12.512	3.50024	5.72578	9.30112	5.26703
17	control	European American	8.12579	7.21495	8.48931	9.53462	6.54637	10.9735	11.4023	6.42513	9.39095	4.64989	12.2886	4.64905	10.0206	8.69242	8.13086	5.48894	5.12913	9.54469	8.03777	12.0891	10.6774	6.36806	11.0552	7.48011	9.74274	12.6517	3.68798	6.15975	9.00388	9.30524	7.6389	5.6222	9.08363	9.87406	6.34236	12.6021	7.04515	5.16852	7.06309	11.1971	5.87164	7.50578	12.3925	4.52999	5.8056	9.20244	5.33333
18	control	European American	7.18461	5.85283	8.4972	9.74593	6.56103	10.9616	11.2569	6.60284	8.94901	3.26581	12.1332	4.88173	9.67813	8.57671	7.94786	5.26821	3.26044	8.34508	7.1428	11.8007	8.76937	4.79223	10.6288	6.28701	10.5268	12.5263	3.71776	6.95615	7.95776	9.13308	7.19448	5.2893	8.25555	8.89371	6.17367	12.5386	7.15093	3.96177	6.79964	11.8042	5.04265	6.94935	12.0479	3.60003	5.44753	8.98414	4.74495
19	control	European American	14.0448	6.96818	8.52852	9.66466	6.61003	11.9506	11.213	5.97303	8.78886	5.86409	11.647	5.81897	10.0812	8.92483	8.44499	8.02974	3.67296	8.8711	7.31296	11.8215	10.0729	7.93337	12.3447	7.29699	10.0907	12.552	4.66179	6.87911	8.95325	9.39419	7.4688	6.01081	8.65331	9.67781	7.22097	12.939	6.89686	4.66964	6.5706	10.6098	5.68333	8.66614	11.9377	3.56924	6.39723	9.01982	5.10065
20	control	African	10.6023	7.68279	8.95173	10.0085	8.16167	11.9352	11.3434	5.74313	8.92292	4.84981	10.7986	7.77814	10.1619	8.66332	8.83502	4.76503	3.76202	9.21729	7.48907	12.0688	10.0696	9.11159	12.7922	6.1528	10.0373	12.6644	4.57705	6.60021	9.46678	10.1585	7.72536	5.89014	9.27788	9.24669	7.77827	12.5817	6.5532	4.72264	7.42669	10.5817	6.21515	9.43022	12.3196	3.1646	5.39456	9.12148	4.60214
21	control	African American	14.8082	6.08874	8.66723	9.51701	7.14358	12.283	11.138	5.145	8.90113	3.77533	11.1787	4.54762	9.01724	8.70652	7.49943	5.24207	4.42553	9.39618	8.01517	12.7471	10.642	6.36762	11.8768	7.77651	9.71527	12.62	3.0966	7.18541	8.63946	9.97677	7.98491	5.65418	8.87298	9.86858	6.48744	13.1742	6.50253	4.95822	6.70661	10.6786	5.34959	10.0059	12.193	3.58887	5.5918	8.87483	4.48342
22	control	European American	7.41895	6.50733	8.46192	9.99588	6.44565	11.8004	11.2173	6.34002	9.15059	4.25674	12.5225	5.31285	10.1655	8.85735	7.94049	4.63192	2.90865	9.04635	7.77629	11.9047	10.0266	5.48885	10.61	6.52437	9.74366	12.4875	3.48701	6.56874	8.86761	8.84948	7.65757	5.84681	8.64102	9.50111	5.83031	12.3077	7.01334	3.47676	7.27268	10.817	5.5457	7.455	11.6611	3.69323	5.49805	9.15815	4.96338
23	control	European American	15.0953	7.35692	8.80116	9.97677	6.90105	12.2907	11.297	6.18172	9.27677	6.22897	13.0078	6.11379	10.5701	8.83488	9.31052	5.26976	3.78238	9.23533	7.15619	12.8286	10.6091	5.4854	11.5262	8.87935	10.2417	12.648	4.4263	6.75512	8.54368	9.99685	7.76501	6.04028	9.0797	10.2555	6.21079	13.4968	7.02903	4.77135	7.11823	11.9254	5.84933	9.92478	12.0978	4.46963	5.71516	9.23837	5.60316
24	control	African	8.75861	5.86378	8.83727	9.33268	7.01686	11.9238	11.6164	7.87324	8.64214	3.45564	11.3461	5.49192	11.3638	8.74383	8.80123	4.98338	4.04488	8.841	8.41972	12.427	9.75383	8.2809	12.7051	6.50268	9.71447	12.6235	3.82923	5.69775	10.0913	9.60711	7.71131	5.71155	8.7312	8.86851	6.4672	12.5359	6.93049	5.11739	6.55394	10.6503	5.60928	8.79473	12.5042	2.50915	5.54192	8.8289	4.34032
25	case	African	7.90953	5.43303	10.702	6.98072	6.98904	11.8825	10.7728	5.75045	7.99121	3.28021	9.59887	4.39254	7.56381	7.61897	7.10935	5.81716	2.83523	8.84433	7.17572	11.4323	9.5622	6.89243	8.8291	6.57734	6.47241	11.6032	3.56229	3.92853	6.7504	6.2898	5.42382	5.92638	8.6243	9.44087	6.18665	9.37267	5.29334	4.00915	5.81117	8.71373	5.58611	4.17372	9.97728	2.14979	5.15895	8.30534	3.73376
26	case	African	8.46277	5.09963	10.4977	6.91509	6.72733	11.6859	10.576	5.5303	8.19942	3.06182	10.6673	3.75429	9.7094	6.46271	7.45933	4.83012	1.83444	8.59988	7.16365	11.8787	8.52997	5.43635	11.2419	7.11928	6.78861	11.9493	3.03307	4.56618	9.3012	6.99235	7.10838	6.54995	8.70633	9.31347	5.30862	9.2582	6.95959	4.21859	6.16504	9.85289	5.42533	6.77342	11.9877	2.86213	5.3747	8.53159	3.73962
27	control	African	11.0557	6.50493	9.17799	10.0942	7.32025	12.087	10.8665	6.43989	8.70616	5.45619	10.7366	6.531	9.75386	8.41995	8.53259	5.80682	4.374	8.95163	7.61055	11.9832	10.3636	8.98286	12.5902	7.55302	9.94723	12.5409	4.43157	6.58773	8.95449	10.3306	7.38955	5.96149	9.42887	9.51378	7.44457	11.6804	7.14235	5.14692	6.54005	10.2464	5.89801	8.88108	12.3357	3.29538	5.55921	8.97537	4.3259
28	case	African American	6.88393	5.80024	8.36185	8.19139	5.6981	9.68104	10.8224	6.51154	8.82624	3.75192	11.8894	4.44632	9.82879	8.6543	7.41599	5.38769	4.0821	8.98217	7.68207	11.3139	8.93452	4.86189	12.7705	5.84948	8.90601	12.5144	3.04714	6.43676	8.89138	9.32274	7.672	5.40866	8.36018	8.90838	5.66571	12.5909	7.06125	4.92581	7.18824	10.6991	4.9787	7.85933	12.4523	3.4539	5.45597	8.74492	4.67326
30	case	European American	7.14416	6.39983	8.56124	9.43609	6.50225	11.0199	11.0012	6.26635	8.7056	3.42426	12.1113	5.26228	10.0957	8.23215	7.96302	5.08903	2.90992	8.64663	7.66453	11.6449	9.3525	4.23941	10.3793	6.08887	9.82139	12.465	3.61261	7.13171	8.65837	9.22774	7.17603	5.4913	8.76556	8.53592	5.59022	12.2179	7.36445	3.37689	6.41767	10.9152	5.54922	7.40917	11.904	4.08054	5.28876	9.28185	4.72233
31	control	African	8.58053	6.97147	8.50371	8.53524	6.62886	11.1475	10.7125	5.74104	8.22169	3.67644	11.4195	5.7873	10.3289	8.82823	8.64266	5.2289	4.22834	8.95518	7.85049	11.6644	9.04887	7.47457	12.281	6.18376	9.80114	12.4408	4.73624	6.83778	9.05172	9.79188	7.08285	5.56403	8.96835	8.72109	6.32628	12.3971	6.57025	4.27449	6.33704	10.7341	5.88509	7.97097	12.2485	3.22564	5.66095	8.74452	5.52655
32	control	African	10.7149	6.31798	8.98611	9.6076	7.49488	11.8661	11.1969	6.50981	8.55612	3.9786	10.7114	5.53811	10.2601	7.92689	8.88282	5.70716	3.4313	8.61206	7.70449	11.888	9.8885	8.91084	12.1882	6.29391	10.0499	12.3684	3.73106	6.50163	8.29958	10.1105	7.59654	5.82611	8.72319	8.66293	6.20031	11.6795	7.09643	4.81059	6.53621	10.091	5.56708	9.14256	12.1888	2.6267	5.36244	8.71964	4.33038
33	control	European American	8.16917	5.93237	8.71153	9.07932	6.63398	10.658	11.0405	6.96517	8.7733	3.84284	12.3765	4.52071	9.79376	8.40059	7.42755	5.03157	4.61798	9.00728	8.13899	11.4284	10.0606	6.32796	10.4293	6.31776	9.64702	12.5976	3.28293	6.40272	8.48179	8.63168	7.29886	5.47279	7.90044	9.27378	6.00766	13.2062	6.60568	4.4557	6.72329	10.4861	5.09095	6.9689	11.8597	3.84336	5.59376	8.79667	4.52857
34	case	African	14.5079	6.02662	10.4329	8.72712	7.03329	12.8004	10.9496	4.64581	7.79604	5.48846	10.1644	4.34416	9.50308	6.66702	8.42961	4.65655	1.64913	8.75663	6.87213	12.5663	7.63125	6.22554	10.1528	7.05918	5.69755	11.6632	3.54635	4.12777	7.59835	9.88644	5.262	5.6903	8.77186	9.42473	6.54121	8.59136	4.7453	4.74976	5.70341	9.37336	5.52487	8.2391	10.5339	2.40239	5.1009	7.90374	3.86497
35	control	European American	13.0907	7.28744	8.61122	9.52078	6.85473	11.1113	11.5004	7.14667	9.00744	4.40952	12.4987	5.53088	9.74908	9.55831	8.48988	5.81676	5.64359	9.71663	7.9639	11.7492	10.2613	11.714	12.5556	8.78105	11.0007	12.6883	4.69815	6.89822	9.59899	9.65916	7.54841	5.62936	8.94286	11.0662	8.87639	13.0303	6.88686	4.76863	6.55192	11.6071	5.83427	8.3338	12.1762	4.21267	5.66777	9.26022	5.39075
36	case	European American	8.76445	6.94194	8.72698	10.1075	6.66385	11.5084	11.2898	6.98357	9.23951	4.63389	12.9339	5.46768	10.4811	8.7229	7.91879	5.47244	4.18186	8.81421	7.63487	11.8943	9.16308	5.74738	10.9997	7.68438	10.0173	12.6097	3.71626	6.63116	9.21155	9.4993	7.4994	5.93914	8.89605	9.66237	6.43682	12.1794	6.97776	4.45185	7.13858	11.8108	5.46376	8.12072	12.0442	4.20313	6.03203	9.19132	5.59648
37	control	European American	7.01002	6.80662	8.51429	8.15771	6.7841	10.2973	10.2423	5.28074	9.46482	3.17079	11.8295	5.71882	9.84325	8.42485	8.3259	5.17611	3.22158	9.2738	7.50416	11.6576	10.0216	4.85135	10.1649	4.98	9.28079	11.811	3.93107	6.96065	7.36979	8.51227	7.4738	6.20129	9.10775	8.58681	5.85121	12.5707	7.09488	3.78523	7.28702	11.0524	5.58346	7.27918	12.3837	5.2595	5.51558	9.40365	5.02361
38	case	African American	8.07526	6.36433	8.20872	8.83423	6.8055	11.3898	11.3003	7.28325	9.09139	4.43423	12.3038	5.91618	11.2114	8.06678	8.12055	4.67114	3.46007	9.01124	7.53168	11.8299	9.93294	6.64133	11.6494	5.99147	9.67477	12.4429	4.14848	6.3839	9.4684	9.0663	7.44574	6.02967	9.26414	9.35668	6.54226	11.9619	6.62433	4.31645	6.45622	11.1068	5.49432	7.11123	12.1441	3.9751	6.08422	8.8739	4.99341
39	control	European American	7.80713	6.23238	8.3272	10.1586	6.34113	11.3483	11.2016	6.82768	8.82761	4.61575	11.8331	5.04182	9.84197	8.44265	7.33767	5.18753	2.58515	9.0473	7.62165	11.7484	10.168	5.39507	11.0706	7.9463	9.69764	12.5152	3.26655	6.39921	7.42397	8.50005	7.42905	5.60479	8.77502	10.1759	5.81077	11.916	6.75304	4.22317	7.09386	11.309	5.62401	6.75012	12.1445	3.85364	5.46806	8.98221	4.58717
40	case	European American	6.93866	6.18138	8.41194	9.94428	6.7376	11.1077	11.3431	6.67787	8.84199	4.15282	12.6266	4.65494	11.2983	8.76331	8.51785	5.49673	3.38023	8.54436	7.47505	11.6441	9.58585	4.65741	10.9163	6.2991	9.98961	12.5505	3.43515	7.04417	9.41858	8.71354	7.23172	5.2008	8.51024	9.18894	5.58021	12.5643	6.79188	4.51615	6.62631	11.3975	4.92323	7.12449	11.9867	3.46073	5.55036	9.09676	3.36664
41	control	African	11.2448	7.87666	10.0952	7.95126	8.31041	11.733	10.6532	7.74824	8.78278	4.85053	10.8102	7.18095	8.21119	7.53493	8.91425	6.02449	4.5114	9.08291	7.8216	12.3397	11.0503	8.46471	11.6198	6.55519	8.78714	12.3504	4.34207	6.6944	8.42774	9.7317	7.3942	6.57918	8.96413	9.15694	7.36513	10.9938	7.63905	4.91902	7.57076	10.8396	5.69506	9.50973	12.147	3.6711	7.75968	8.64553	4.26068
44	control	African American	8.74634	6.56579	8.64531	9.35664	6.76598	11.8447	10.892	5.25812	8.8363	3.72971	11.7997	5.97153	9.98922	8.58377	8.39153	5.55868	4.09347	8.96492	7.98022	12.3007	10.3849	6.58545	12.4417	7.20608	9.62731	12.4434	4.15819	6.62665	8.48859	9.21766	7.83251	6.91948	9.21083	9.53348	6.8641	13.3475	7.08482	4.78263	7.42614	10.715	5.75382	8.5373	12.6343	3.54313	5.94395	8.98243	5.05881
45	case	European American	7.47458	6.80496	8.46412	9.87189	6.16064	11.1892	11.2945	6.00962	8.87422	3.55544	12.3773	5.58408	10.0032	9.18371	8.66434	4.57905	3.53381	9.17694	7.84974	11.6784	10.8358	4.77249	11.1138	8.25841	9.92367	12.5851	3.60764	6.17615	8.39438	8.46744	7.40709	5.71112	9.14038	9.85683	5.86398	12.8168	7.26221	4.29027	6.70014	10.989	5.88824	7.42726	12.0103	3.74434	5.36423	9.13112	4.98336
46	case	African	13.6351	5.84064	10.6303	8.07328	7.10684	12.901	10.9192	7.01063	8.45872	5.70669	11.0782	4.05477	9.01266	6.64921	7.38959	5.58863	2.96416	10.3636	7.11712	12.1087	9.2286	6.97471	11.5052	7.94018	6.58837	11.8495	3.57961	4.35263	8.72193	8.78726	5.53646	7.16114	9.29862	8.97064	7.37541	9.04284	5.52271	4.77783	6.39849	9.85051	5.88126	6.71715	10.395	3.0553	5.04024	8.59164	4.22761
47	case	African	8.36021	5.9413	8.66456	8.37506	6.59342	10.7474	11.2575	6.59091	8.92341	4.7663	10.9965	6.07239	9.61025	7.47966	8.63478	6.3474	3.03781	8.45974	7.66811	11.8907	9.47073	6.55487	12.8046	5.31258	9.36158	12.7242	3.3222	5.45572	9.02449	7.95692	7.31204	5.22886	9.63292	9.19496	6.47265	10.7508	6.83983	5.34868	6.57741	10.8838	5.39575	7.07635	12.7273	3.63334	5.37093	8.74602	4.40518
49	case	African American	14.3102	7.14116	9.12765	9.61881	7.46582	11.999	11.3311	6.93329	8.78115	5.88608	12.578	6.72235	10.6125	8.67662	9.2853	6.20237	3.58715	9.44537	7.61185	12.515	11.0957	9.37334	12.1558	7.63288	10.0049	12.588	4.4328	7.1194	10.0845	10.4803	7.72893	5.6243	8.58798	9.66594	7.52748	13.1861	6.84247	5.29297	6.7211	10.9471	5.69948	10.2545	11.8898	3.95519	5.70241	8.60438	5.19979
50	case	European American	11.3176	8.29974	8.93182	10.0654	6.33182	11.8593	11.0013	6.79913	10.2607	5.24095	12.5539	6.21616	10.7064	8.70506	9.99142	5.07691	3.92642	9.59219	7.69746	13.2304	9.60075	5.28991	12.4944	8.21261	9.62138	12.623	4.61289	6.09947	9.27676	9.31154	8.08347	6.35145	9.67331	10.0434	6.82301	12.6592	7.58969	5.70886	8.08586	12.188	6.22147	9.40723	12.6891	4.79119	6.30567	9.51425	6.40836
51	control	African American	6.80394	5.87926	8.5317	9.68815	6.38977	11.7953	11.5699	6.51558	8.59077	2.99905	11.173	4.85642	10.7859	8.6658	6.45511	4.7429	3.00179	8.53001	8.13704	11.5988	8.84592	5.11505	11.9727	6.63271	9.8227	12.5482	3.5623	6.52781	9.46836	8.89445	7.46918	5.72385	8.6181	8.86986	5.96871	11.9992	6.9496	4.37222	7.0826	10.9652	5.79535	6.94317	11.8979	3.32563	5.25001	8.81562	4.57579
52	control	African American	9.13721	6.24191	8.50266	9.89981	6.69346	11.7096	10.6713	5.94271	8.73254	3.31147	12.3552	5.55611	10.724	8.65835	7.50204	5.28703	3.64306	8.4884	7.51717	11.5477	9.97094	6.17322	11.3873	6.28345	9.86023	12.3273	4.06063	6.63556	9.36822	9.24909	7.3664	5.24969	8.12585	8.72705	6.03378	12.8803	6.71453	4.29663	6.48358	10.2661	5.38612	8.69572	11.6733	3.74452	5.67024	8.85211	4.46731
53	case	European American	8.4365	6.31427	8.47763	10.3199	6.13626	11.9946	11.4564	6.4793	8.94419	4.08239	12.4165	4.89874	11.0375	8.5074	8.53451	5.23884	4.01831	9.0529	7.81159	12.1587	9.59841	5.79953	11.0506	7.39917	10.0965	12.5819	3.26665	6.17954	8.81601	9.63763	7.45858	5.63487	8.48056	9.61967	6.18088	13.1735	6.74577	5.12472	6.75618	11.9956	5.15485	8.51461	12.4051	3.68283	5.65246	9.02609	4.50116
54	case	African American	8.17552	7.03063	9.09224	7.55268	7.03437	8.3737	10.6936	6.53063	9.41567	8.17913	11.7878	6.18187	10.1442	9.0155	8.90139	5.46661	4.4771	9.54433	7.64867	12.2549	9.93352	6.06111	12.3277	5.31225	9.91109	12.5249	5.5488	6.74055	8.90661	9.88682	7.90283	6.02281	9.40101	9.71772	6.42509	12.3586	7.46414	4.90992	7.89319	11.576	5.70061	9.23825	12.6323	4.52353	6.15607	9.33427	5.24107
55	control	African	12.9784	7.26245	9.74682	8.72456	7.87782	11.5955	10.9861	5.56198	8.62401	7.27456	10.982	7.24352	10.5608	7.90663	8.43672	5.02626	3.52955	8.63577	7.55901	11.8202	10.0968	8.23791	12.2389	7.91899	8.88065	12.5439	3.29955	6.10729	8.75696	11.2317	7.24978	6.46932	9.63751	9.49632	6.4981	9.43019	6.92589	4.8809	6.22694	10.7825	6.1993	13.0455	11.3418	2.9003	5.64313	8.97447	4.28638
56	case	European American	7.7452	6.42376	8.42054	9.67581	6.75974	11.1199	11.0811	6.38815	9.10565	3.88616	12.5576	5.61785	11.1149	8.55315	8.09409	5.00128	3.72424	8.72362	7.67349	11.8001	9.22063	5.93359	10.8714	6.57224	9.76964	12.5021	3.56278	6.53331	9.17658	8.80269	7.49377	5.468	8.7327	8.8355	5.78356	13.064	6.81336	4.94878	7.14284	10.8308	5.25778	7.51977	11.7183	4.23587	5.3869	9.10652	4.78926
57	case	African	14.5589	7.81926	10.2134	7.3925	6.93995	12.6104	11.0752	4.80697	9.56193	9.2803	11.3751	6.08273	10.0368	7.40732	8.80661	6.35209	5.38801	9.20097	7.72055	13.016	10.7512	9.81478	12.3799	9.25418	9.23355	12.3771	4.15902	7.24823	8.58271	13.37	7.38757	5.6788	9.90597	10.144	7.3052	10.3018	6.85915	4.69496	6.76433	10.9632	6.52227	14.0105	12.0435	3.468	5.63051	8.93814	5.23767
58	control	European American	7.75564	6.9606	8.72704	9.54146	6.95136	10.9342	11.2412	7.01771	8.93902	4.21554	12.2406	5.56617	10.16	8.7704	8.77005	5.46921	3.66474	8.69769	7.96615	12.0241	8.73364	5.0972	11.5634	6.84535	10.0429	12.6416	3.78649	7.11045	8.9027	9.93112	7.61989	5.60635	8.85369	9.45756	6.23152	12.7326	7.41175	4.61891	6.80412	11.626	5.72458	7.60308	11.9543	4.67886	5.62175	9.29162	4.81196
59	control	European American	7.77254	6.47415	8.78556	9.24172	6.66543	11.219	11.3841	6.619	9.24163	3.66234	12.1813	4.87968	10.1443	8.60065	8.72934	5.81795	3.61233	8.08841	7.76692	11.7575	9.77796	5.27127	10.8071	6.85886	9.89075	12.6056	3.55087	6.65099	8.92247	8.13603	7.55314	5.50811	8.35032	9.31382	5.94112	12.9294	6.91986	4.5054	6.89418	11.2004	5.44114	6.70113	11.9029	3.64938	5.60215	8.9662	4.75524
61	control	African	11.8962	6.18864	8.88259	9.96468	6.90911	12.5218	11.0913	5.97118	8.65681	4.7138	10.8932	5.64296	10.6338	8.67489	7.91633	4.99551	4.04867	8.17961	8.06976	12.6483	9.42452	5.92253	12.3031	7.01494	9.97324	12.6358	3.37386	6.01247	9.18025	9.34825	7.96353	5.22346	8.4042	9.32758	6.03899	12.1339	6.80935	5.39184	6.41831	10.6881	5.47161	9.90117	12.5732	2.84506	5.90097	8.89116	4.1698
64	control	European American	14.8759	7.08421	8.84148	10.4062	7.14649	12.548	11.6635	6.36011	9.19583	5.8292	12.4909	5.16258	10.6194	8.61008	8.47509	5.09887	3.6321	9.10376	7.85084	13.1232	9.89295	5.4769	11.7618	9.03471	10.225	12.6907	3.40706	6.96417	8.72638	8.4696	7.85404	5.5033	8.80775	10.4826	6.69431	12.8737	6.94096	5.34143	6.59084	11.6358	5.59789	7.15944	12.3833	4.36891	5.95244	9.23648	4.96056
66	case	European American	12.7084	7.0815	8.34939	9.98085	6.73323	11.698	10.896	6.8601	9.05852	4.42922	12.3655	5.74317	10.8133	8.46203	8.59765	6.19836	3.0808	9.02314	7.33357	12.3652	10.8062	6.74338	10.6021	7.74105	10.0982	12.4534	3.60744	6.92797	8.87652	9.34074	7.55528	5.66679	8.941	9.35324	6.27987	13.1072	6.7697	5.03906	6.39079	11.0339	5.63554	7.69122	11.9641	3.94432	5.52286	9.07145	4.97926
67	case	European American	7.17966	6.72691	8.58078	9.81988	6.26708	11.8467	11.0161	5.83335	9.12176	3.78906	12.7645	5.47611	11.1909	8.42204	9.35718	4.5567	3.64304	8.90178	7.17071	11.995	10.2495	5.95979	10.3226	6.46533	9.68401	12.3427	3.8914	6.16389	6.5288	9.69181	7.715	5.51344	8.90249	9.23397	5.91834	12.7499	7.17797	4.09567	7.0091	11.0289	5.28843	8.51106	12.1539	3.59578	5.71075	8.99761	5.23303
69	case	African	14.0686	6.46336	10.0779	5.45047	7.65204	12.4228	11.133	5.28987	8.5783	14.9586	14.3703	5.54349	10.2873	7.30524	8.74941	5.33403	3.90277	9.51825	7.54802	12.5358	9.57352	9.54751	13.6362	9.20986	8.17559	12.4292	2.65984	6.835	10.5814	13.9877	7.11612	6.56336	8.37959	10.7841	6.76112	9.42623	6.6124	7.81666	6.45606	10.2077	5.76369	14.381	11.97	3.54216	6.31257	8.52734	3.79273
70	control	European American	7.80582	6.24856	8.6824	7.29503	6.77577	8.9196	10.5898	6.4672	9.28554	3.56773	11.8492	5.76164	9.68359	8.67429	8.80884	5.45376	3.34567	9.21516	7.66501	11.8128	10.0794	6.07484	10.1164	5.1519	9.57164	12.5121	3.07635	6.95297	8.28813	8.57062	7.54204	6.05353	9.04525	8.92908	6.41027	13.025	7.38973	4.64993	7.0953	11.0176	5.84504	7.5943	12.3519	4.36696	5.7709	9.15769	4.96066
71	case	African	11.0116	6.28905	8.60951	9.14241	6.93757	12.1409	11.3006	6.61249	8.98474	4.78907	11.1843	5.69192	10.7456	8.41376	9.42136	5.06295	4.01549	8.95829	7.54718	12.4004	10.0091	8.25482	12.7482	8.47729	9.83076	12.6386	3.89463	6.66635	9.14883	10.0599	7.71799	5.53697	9.305	9.67568	6.18696	12.0323	7.03855	4.7482	6.88442	10.6483	5.97453	9.82939	11.9105	3.37994	5.49897	8.94949	4.16856
72	control	European American	13.6139	6.56426	8.643	9.26619	6.68746	11.8224	11.26	5.90497	8.7626	3.92861	13.0417	5.25775	11.4264	8.33361	9.01521	5.57093	3.73409	8.35419	7.45094	12.0381	9.91649	5.95701	10.7497	7.14181	9.58463	12.4894	4.18216	6.04751	7.71834	9.94531	7.408	5.19371	8.51047	9.0085	6.31837	12.9859	6.55232	4.53539	6.46045	11.1409	5.45739	9.07575	11.4991	3.18574	5.42283	8.81206	4.5069
73	control	African	10.4125	7.65008	9.10208	9.02681	7.68605	11.4304	10.7092	5.17102	8.6815	4.5938	11.3458	6.36084	9.15308	8.48518	11.1979	5.59295	4.55152	9.602	7.80895	12.4271	10.875	8.61341	11.9973	6.20472	9.50777	12.5761	4.08558	6.93513	9.11211	10.3001	7.78093	6.4204	9.38823	9.19846	7.37896	13.0002	7.42182	5.40036	7.34599	11.0839	6.18295	9.43902	12.5867	3.3948	5.68472	9.32266	5.01185
74	case	European American	8.12649	6.96638	8.49747	8.36356	6.45175	9.56339	11.2134	7.59103	8.80269	2.97003	12.0655	5.79849	10.2589	8.33843	8.26183	4.63273	3.36449	8.64555	7.57817	11.5934	10.1991	6.27122	10.3505	6.09239	10.3829	12.5608	4.76083	7.10074	8.23497	9.21884	7.35222	5.67763	8.75901	9.47221	6.0671	12.6934	7.31077	4.89528	6.66709	11.4544	5.70678	7.24535	11.5453	4.04791	5.71272	9.1442	5.20668
75	control	African American	7.22628	6.91046	8.44702	8.96447	6.58127	10.3141	11.3076	6.85108	8.82958	3.50735	11.5763	4.47134	11.6042	9.115	10.7341	4.895	3.67047	9.31138	7.71969	12.3352	11.053	5.62875	12.377	6.12981	9.3467	12.5489	3.84488	7.11233	9.31706	9.78244	7.6906	5.98882	9.18152	9.17842	7.01846	13.1947	7.20122	5.062	6.86133	11.0041	5.77533	8.80539	12.3154	3.79593	5.58296	8.72288	5.07337
76	control	African American	8.71684	6.70766	8.91668	9.88279	6.64598	12.093	11.1367	5.96515	8.81666	3.61905	12.9074	4.7343	11.1876	8.77918	7.64152	4.83866	3.53881	8.86938	8.18044	11.9517	9.28918	5.41007	11.2318	8.15592	9.92799	12.5624	4.12197	6.15562	8.33527	9.48466	7.61908	5.68786	9.11484	10.2197	6.32883	12.7856	7.03818	4.6713	6.99704	10.8864	6.21471	9.4484	12.1098	3.95774	5.45651	9.12493	5.07337
77	case	African American	7.73861	6.27363	8.68837	10.0127	6.30484	11.9092	11.3552	7.00364	9.00546	4.17689	11.2555	5.0199	11.3234	8.89534	8.2869	4.63195	3.09502	8.78598	8.02152	12.2784	10.3962	5.47904	12.2911	6.9315	9.71319	12.4962	3.75247	5.4572	9.33046	9.39667	7.46675	5.76813	8.59674	9.47937	6.12629	12.937	6.74411	4.26011	6.8233	11.15	5.27278	8.11178	12.0469	3.50648	5.77164	9.12739	4.84458
80	case	European American	14.2968	6.50901	8.95982	10.7114	7.1506	12.4708	11.5002	6.16502	9.05656	4.84072	13.1212	6.02172	11.3082	9.13873	8.47562	5.11668	4.36101	9.38834	7.76643	12.6721	10.6116	10.6864	12.2872	9.57879	10.1726	12.6771	5.35014	6.41541	8.75835	10.4589	7.98775	5.86378	8.32597	10.4862	7.45718	12.8516	7.24682	4.73524	6.85591	11.4207	5.55304	11.0688	12.1002	3.71926	5.68817	8.95591	4.80452
82	control	African	11.7499	6.77476	8.84942	9.50495	7.50052	12.0427	11.1991	6.67549	8.88841	6.90272	11.5532	6.10283	11.4557	9.18604	8.62418	5.01823	3.89251	9.49572	8.15036	11.9514	10.3504	9.58386	13.0524	7.7494	10.1309	12.6851	4.2258	7.07754	10.6004	11.2488	7.85404	6.28982	9.19588	9.26411	7.55105	11.3782	7.38113	5.34997	6.80988	11.1351	6.3742	12.2859	12.4082	3.27915	5.32795	8.78389	4.34655
83	control	African American	14.3079	6.48228	8.58641	10.518	6.72843	12.42	11.1365	6.96371	9.12675	4.33237	12.6244	4.77989	10.7027	8.64339	8.982	5.32616	6.4534	8.67893	7.93036	12.8041	10.2026	7.71949	11.0484	7.78146	9.57422	12.7045	3.76071	6.46976	9.80951	9.10965	7.7677	5.73204	8.78261	9.87388	6.93723	12.755	7.31312	4.29893	6.96408	12.1531	5.56438	7.59228	12.05	3.70961	5.43409	8.98129	4.68471
84	case	African American	9.81215	6.38183	8.50491	10.3088	7.23356	11.7664	11.2455	6.79938	8.83512	4.01318	11.2574	5.83283	10.9919	8.76315	8.04789	5.23221	3.58189	8.5739	7.74721	12.1194	9.6047	5.87682	11.4389	7.31967	10.173	12.4944	3.71873	6.6526	9.63895	9.06056	7.5167	5.65135	8.29034	9.32662	6.59941	13.2913	7.05061	4.76153	6.56434	10.8983	5.69909	8.83474	11.9404	3.96527	5.6246	9.17232	4.33542
85	control	European American	10.0433	6.1454	8.66704	10.3928	7.02608	12.1222	11.4516	6.77269	8.79634	3.40276	12.1048	5.10468	9.47538	8.58312	9.18553	5.43713	3.28821	8.39726	7.51003	12.4325	9.46727	5.38083	11.6337	6.86084	10.0675	12.5985	3.1028	6.57834	8.22193	8.63583	7.50202	6.00055	8.31511	9.23804	5.83954	12.7683	6.7271	4.24281	6.41317	11.2439	4.94456	8.91158	12.0422	3.42618	5.84153	9.20473	4.47555
87	control	African American	6.67509	6.34116	8.30773	9.27971	6.42203	10.6784	10.9172	5.84984	9.08872	4.07327	11.3036	5.88734	9.91673	7.91838	8.15147	6.25338	3.65603	8.65684	7.92909	11.8615	8.67103	6.60581	11.5869	5.817	10.1069	12.3719	3.83396	7.07158	8.55994	9.01042	7.48068	5.75062	8.62433	8.9961	6.95385	12.7278	7.18085	4.83362	7.09664	10.1408	5.20162	7.72941	12.1576	3.94626	5.80696	9.21319	5.23585
89	case	European American	10.4982	6.19995	8.60865	9.93721	7.31154	11.9337	11.3831	6.91855	8.86415	3.56193	12.1818	5.88054	10.5265	8.89138	8.06449	5.40889	3.15682	8.89886	7.42702	12.1295	9.63445	5.34291	11.0101	7.61844	9.88554	12.5726	2.50249	6.72577	9.11611	9.07964	7.39807	5.70753	8.37596	9.39037	6.19808	13.0419	6.88986	4.01691	6.82107	11.6585	5.05403	8.77465	12.0791	4.07281	5.67593	9.07582	4.61664
90	control	African	9.57678	6.41024	8.57315	9.21388	7.16576	11.9269	10.9117	5.49562	8.73147	5.06227	10.9458	5.7897	9.81887	8.21594	9.54005	5.43528	3.75998	9.42802	7.80534	12.2058	10.2051	7.72919	11.9936	6.09797	9.58002	12.5206	3.7729	6.55842	9.0158	10.0515	7.71127	5.12092	8.73685	9.31569	6.95625	12.5097	6.60273	4.46519	6.80771	10.4309	5.45171	8.28284	12.1277	3.16731	5.62597	8.78535	4.62759
91	case	European American	6.9599	7.02934	8.55655	9.98184	6.50902	11.2957	11.1254	6.35308	8.52133	3.07405	11.3546	5.43388	9.78642	8.55438	7.84872	5.2803	3.70929	8.48398	7.74125	11.8813	9.46846	4.78431	10.3241	6.85678	9.81808	12.5598	4.45026	6.085	9.2578	10.2488	7.25976	5.53466	8.67063	8.97972	5.25114	13.0758	6.96211	4.30921	6.83156	11.5066	5.27166	6.76946	11.7125	3.83823	5.5983	9.15109	4.74346
92	case	European American	8.5005	7.03256	8.60561	5.19835	7.14836	6.4312	10.2208	6.89985	9.66539	4.26334	12.6001	5.60508	9.51027	8.13107	11.0072	3.89476	3.9455	9.83083	7.30879	11.9759	11.6076	8.10324	10.2879	4.58229	9.93448	12.2363	4.85903	6.94126	8.04122	9.14131	7.76283	6.38654	9.0742	9.44519	6.83789	13.9803	7.83721	4.22378	7.33961	12.526	6.35178	7.74532	12.2136	4.74414	5.80242	9.39668	5.4211
94	control	African American	13.7644	6.39724	8.44469	10.0282	6.74462	12.3592	11.3729	5.98006	8.83174	4.33469	12.6197	4.50771	9.68273	8.51684	8.2217	4.12479	3.50741	8.74056	7.73043	12.6727	9.18021	5.74075	11.3216	8.53721	9.95389	12.6246	3.5058	6.14192	8.72413	9.25509	7.64011	5.41423	8.5766	9.69484	6.36351	13.1691	6.78618	4.32089	6.92811	11.5847	5.47415	8.62298	12.0139	3.48788	6.00225	9.05676	3.98218
95	control	African	8.9612	6.99298	8.74197	9.1891	7.70888	11.7174	11.0086	5.75469	8.68857	4.15099	11.0326	5.80017	9.25179	8.76336	9.89184	5.11824	3.79184	9.01113	7.61725	12.2252	10.5427	7.99381	12.016	6.82133	9.9055	12.5954	4.03727	6.73196	8.98728	10.5787	7.24301	6.05788	8.94239	9.02503	6.82673	13.3156	7.13856	4.2235	7.29127	11.0366	5.90238	8.35688	12.1454	3.83364	5.54612	8.96954	4.3347
96	control	African	9.70035	6.402	8.7727	10.0566	7.44668	12.2382	11.1997	6.4751	9.0226	3.70084	11.1914	6.04447	10.8621	8.13416	8.58328	5.18775	3.90114	8.65064	7.67146	12.1641	10.0085	7.4386	12.5095	6.7981	9.53242	12.6437	3.46289	6.30992	7.99815	9.69501	7.57507	5.55563	8.77777	9.25808	6.34493	12.1496	7.03071	4.63188	6.74086	10.4928	5.82386	7.99138	11.8998	3.65854	5.25584	8.91189	4.13831
97	control	African American	7.60438	6.2418	8.38563	9.33353	6.85353	11.4316	11.3776	6.35271	9.27565	2.86529	11.4603	5.48075	11.1646	9.00537	8.30175	5.44624	4.16794	8.63494	7.80942	11.8602	9.37967	4.92393	11.6484	7.19746	9.93724	12.6989	3.64015	6.69895	9.33295	10.1385	7.77101	5.61522	8.60049	9.09826	5.95037	13.2062	7.13461	4.72554	6.92192	11.2351	5.68566	8.47291	12.1718	3.83734	5.93778	9.48256	4.68607
98	case	African	13.0945	7.20547	10.8701	7.10579	7.60607	12.7481	11.286	5.81123	9.43449	6.12394	12.5528	6.34538	10.6573	7.41036	8.73791	7.66507	4.26221	9.37386	7.85542	12.7434	9.55897	7.43858	12.245	8.21101	8.66677	12.6558	4.22593	6.70236	9.77502	11.5589	7.61602	6.68322	9.80726	10.3468	6.70528	9.79462	7.51572	5.21447	6.8571	11.2098	6.89411	10.3271	12.5768	4.16229	6.19225	9.32166	5.21532
99	control	European American	9.04471	6.62086	8.66021	9.807	6.94494	12.0054	11.2802	6.55893	8.98787	4.31786	11.8461	4.90325	9.42779	9.22006	8.52746	5.70126	4.05439	9.10413	7.83072	12.3076	11.165	5.58947	10.2108	7.37682	10.4566	12.6376	3.77989	6.35184	7.94498	8.50211	7.75517	5.73668	8.94917	9.58047	5.97544	12.888	7.2333	4.80754	7.20963	11.6688	5.7849	6.92516	12.3497	3.78568	5.71579	9.28489	4.93128
100	case	European American	7.21515	6.34457	8.57176	8.7355	6.35988	10.0938	11.1131	7.0326	9.17829	3.89523	12.1692	5.06752	10.1902	8.76206	8.56327	4.98013	3.42646	8.63967	7.23846	11.661	9.47558	5.58226	10.3225	5.79506	10.0923	12.5995	3.57862	6.72838	8.17408	8.70781	7.45377	5.71141	8.66078	9.19647	5.93062	13.0267	7.1802	4.56772	7.14979	11.2892	5.22612	7.14839	12.1118	4.06873	5.77933	9.06158	4.55995
101	case	European American	7.35998	7.34996	8.67965	9.45326	7.22894	10.8657	11.1576	6.57539	9.83391	3.8958	12.7162	6.48028	10.5378	8.90221	9.37323	5.45265	3.49699	9.14289	7.66963	12.102	11.2411	6.72362	10.0998	7.11579	10.3189	12.6281	4.40409	7.16434	7.67154	8.91954	7.73918	6.34074	9.47024	9.83287	6.60486	13.2734	8.09919	5.17264	7.50107	12.1637	5.90791	8.16466	12.0177	4.70827	6.46087	9.58884	5.60693
102	control	African	14.1407	7.04623	9.62701	8.81485	8.12341	12.0581	11.2826	6.44221	8.81931	11.0673	11.0918	6.66249	9.798	8.66096	8.10538	5.79623	4.43793	9.17044	7.95809	12.2824	11.048	8.27834	12.3705	8.03096	9.8806	12.5668	3.94155	6.96886	8.34754	12.7259	7.48561	6.36017	8.96846	9.4963	7.313	10.7001	7.58351	4.93751	6.38542	11.4113	5.60839	13.1423	12.1083	4.06339	6.27189	9.10968	4.52449
103	case	European American	13.2758	7.74954	9.51732	9.81533	7.76987	12.1364	11.1474	6.88611	9.98068	5.2642	12.885	6.41201	9.38218	8.67722	9.81799	7.17879	3.96043	9.39061	8.02278	13.2335	10.8473	7.15174	10.9307	7.94357	10.3868	12.743	4.68812	7.79315	8.85455	9.39601	7.85674	6.64183	9.28716	9.86995	7.17703	12.8282	7.49808	5.62689	7.98336	12.1206	6.12658	8.31284	12.5111	5.23138	6.13974	9.65608	5.62181
104	control	European American	9.63481	6.45234	8.4627	10.4238	6.5492	11.9962	11.301	6.62378	9.04338	4.7224	12.4651	5.09739	10.2466	8.83683	7.55073	4.96412	3.34752	8.55149	7.74963	12.0369	9.4826	4.7116	11.4832	8.28296	10.2466	12.3301	3.16718	6.34772	9.20266	9.21535	7.21725	5.43318	8.28707	9.99798	5.62315	12.1867	6.87997	3.99206	6.52198	12.1913	5.23154	8.19783	12.0355	3.44079	5.28843	8.95761	4.37957
105	control	African	12.5988	6.78147	9.23767	10.157	7.83408	12.3576	11.5601	7.24068	9.33431	5.08076	11.2645	6.22381	11.2138	8.88709	9.76731	5.58504	4.07142	9.33656	7.85909	12.4501	11.0665	7.48999	12.3673	8.34042	10.409	12.6407	4.06567	6.62479	9.87456	10.2374	7.93048	6.11546	9.78183	9.90981	7.05003	11.9286	7.47149	5.25011	7.17805	11.6958	6.49874	10.3723	12.2124	3.761	5.76804	9.22616	4.80965
106	control	African	13.1901	6.58928	9.11079	9.20328	7.44155	11.6922	10.7873	5.54088	9.07004	7.01894	11.799	6.20123	9.7644	8.73388	9.25614	5.30111	4.67249	9.48739	7.74303	12.2837	11.6616	6.19805	12.0453	8.70341	9.45744	12.4086	3.94281	6.90929	9.08941	11.0975	7.52391	6.15808	8.61239	10.0907	6.46849	13.8105	7.15781	4.54845	7.02216	11.6635	6.445	11.3562	12.1804	4.25833	5.6852	9.42858	5.58405
107	control	European American	7.26632	6.48758	8.86019	7.7948	6.56074	10.0701	10.9866	7.0023	9.29327	3.52381	12.4328	5.285	10.4084	8.9575	8.36172	4.97615	3.32186	8.69812	7.63247	11.6087	10.0936	5.2126	10.1383	5.69636	10.1769	12.6527	3.46325	6.58901	9.08787	9.35514	7.64417	5.68802	8.84032	9.26628	6.13998	13.251	7.34745	5.1832	7.29901	11.1031	5.67888	6.777	12.2386	3.8227	6.20106	9.31504	5.03596
108	control	African	10.0916	6.77037	8.9715	10.3157	7.28552	12.4102	11.4142	6.713	9.26547	4.66565	11.394	6.07056	11.4351	8.96035	8.60768	5.01541	3.59548	8.82659	7.79698	12.6915	10.0129	7.55285	12.1429	7.77332	10.0156	12.6693	4.2015	6.43392	9.93932	10.008	7.98475	6.42833	8.91038	9.88899	6.85504	12.6008	7.44806	5.62139	6.79572	11.141	5.99577	8.92834	12.4051	3.75585	5.97039	9.33846	4.70796
109	case	African	14.7795	6.78596	9.08808	8.82068	7.75782	12.1057	11.4306	6.34641	8.95447	12.3443	12.6136	6.28924	11.0731	8.2888	7.99238	4.91305	3.53096	9.14254	7.98347	11.9535	11.007	8.65571	12.8472	9.1197	10.0485	12.6838	3.77469	6.79066	9.23556	13.2818	8.09514	5.82022	9.10192	10.3236	7.00497	12.0163	6.95888	4.80753	6.56512	10.4105	5.68665	14.1816	12.1655	4.06177	5.55632	9.24357	4.99145
110	case	African	10.2652	6.25716	10.3352	5.41394	6.66918	12.0819	10.9684	6.60817	8.85859	4.15828	11.063	4.86266	10.8339	6.64855	8.27217	5.87257	2.55987	8.88638	7.45589	12.0546	9.12893	4.28353	11.9589	7.95225	8.0525	12.3645	3.78163	6.28176	8.18968	9.14179	5.64452	6.90738	9.02738	9.79388	5.29223	9.21047	6.98461	4.79628	6.84987	9.97738	5.59879	8.17677	11.7294	3.18119	6.28262	8.89586	4.27917
111	case	African	14.2159	7.64885	10.7372	7.43508	6.77214	12.3115	10.8282	5.5473	9.70973	13.6663	11.9894	4.93299	8.67257	6.7443	9.08324	4.66524	4.19417	8.87383	7.11842	12.3801	8.84534	4.82463	12.0761	7.42983	6.31482	12.1219	3.53011	5.26648	6.81334	13.4118	6.84584	6.81758	8.80651	10.3097	5.78679	9.28061	6.94779	4.9611	6.49868	10.6103	5.21879	13.9871	12.0223	3.72678	5.43115	8.88838	4.91973
112	control	African American	7.72269	6.12999	8.58532	7.39085	6.83961	8.58944	11.2265	7.325	9.03562	3.34848	11.566	5.13504	10.4942	8.96002	7.64517	4.95075	3.41325	8.81768	7.68892	11.6664	9.68248	6.05163	11.5319	5.56289	9.489	12.5725	3.35344	6.42584	8.78157	8.97806	7.5814	5.67714	9.10444	9.26037	6.03186	13.0073	7.2415	5.07332	7.46428	11.4526	5.16697	6.69903	12.3252	3.23081	5.67486	9.30428	4.31151
113	control	European American	6.42375	6.11993	8.85679	7.37829	6.53037	8.96129	11.1026	7.31147	8.78597	3.52525	11.9466	4.64301	8.88838	8.4497	7.22214	5.04269	3.02528	8.45885	7.93088	11.3294	10.6207	5.03906	10.5798	5.52879	10.0264	12.6798	3.65374	6.58351	7.6684	8.64542	7.35605	5.31889	8.20591	9.07867	5.47127	13.5252	6.93438	4.97087	6.58196	11.7219	5.50896	5.84422	11.995	3.54641	5.63673	9.18245	4.56955
114	control	African	11.1443	6.86502	8.8078	7.89576	8.02624	11.0496	10.7606	5.17517	8.0685	4.34019	10.695	7.00535	8.55193	7.55614	8.31625	5.46167	3.60861	9.00672	6.98538	11.6701	9.56804	7.37467	11.81	5.70766	9.28253	12.4416	4.41215	6.29643	8.12102	8.5638	7.31805	5.92691	8.54179	8.66592	7.39454	10.2696	6.664	4.66727	6.22804	10.626	5.55297	8.3196	11.8036	2.67151	5.2131	7.8262	3.7369
115	control	African	9.87463	6.00448	8.42268	9.04417	6.493	11.7298	11.1866	6.13771	8.37451	3.599	10.654	5.46668	10.62	8.33637	7.40614	4.32962	3.5129	8.24767	7.3233	11.751	8.72571	5.59847	12.2548	6.4619	9.70791	12.6129	3.26416	6.34423	9.04601	9.00365	7.1722	4.93477	8.90809	8.58676	5.83968	12.8092	7.22413	4.11822	6.62547	10.757	5.14693	8.41094	12.0932	2.90636	5.54373	8.61652	4.02773
116	case	African American	7.35051	5.6799	8.7249	6.00882	5.90427	7.50866	9.9616	6.54108	8.36564	4.16698	10.985	4.18468	9.72903	8.38673	7.52555	4.40629	3.69711	8.67083	7.91574	11.177	9.20359	4.336	12.1068	4.9578	9.39649	12.1076	3.01962	5.88493	8.03381	7.91997	7.26389	4.57028	8.29576	8.51157	5.57104	12.5327	6.96611	4.3382	6.75311	10.6828	4.7511	5.97758	11.7863	3.21683	5.27582	8.89706	4.18144
117	control	African American	7.89495	7.0675	8.47987	8.8853	6.72423	9.90262	11.2981	6.4304	8.67947	5.14667	11.5431	5.05489	10.2037	9.35883	8.26166	5.88583	4.03359	9.65537	7.77651	12.076	10.473	5.35659	11.6745	6.08144	9.26269	12.6276	4.14145	6.67043	9.69461	8.85431	7.33152	6.29908	8.97101	10.358	6.80137	13.0124	6.97624	4.7494	6.84933	10.5214	6.06089	6.74239	11.8645	3.88462	5.60789	9.27895	4.74505
118	control	African	9.7261	6.82801	8.69757	9.07637	6.6218	11.6719	10.8185	6.53766	8.77898	4.77516	11.0972	6.15089	9.60276	8.68364	9.42759	5.44731	3.48374	8.97053	7.33712	11.8329	9.25391	5.83224	11.8082	6.32272	9.58246	12.449	3.84824	6.99396	8.99154	8.99527	7.55862	5.41681	9.13835	9.00698	6.14489	12.8256	7.4527	4.88885	6.66921	10.8624	5.43225	8.33636	12.0396	3.62971	5.55192	8.90429	4.56983
119	control	European American	7.45423	6.06342	8.77195	10.3287	6.7339	12.037	11.4613	6.81435	8.68544	4.15829	12.8216	5.13766	10.5255	8.17435	9.01718	4.37712	3.12986	8.62041	7.84947	12.1906	10.2273	6.05469	10.5833	7.6333	10.1177	12.5142	3.40373	6.61894	9.49794	9.26175	7.43926	5.33255	8.05361	9.24396	6.15228	13.3019	6.76126	4.83309	6.92304	11.3114	5.24576	7.74528	11.6248	3.54389	5.57197	8.8991	4.28355
120	control	European American	6.79868	6.07783	8.14498	6.62489	6.15642	10.7943	10.8989	6.35291	8.73187	3.89379	12.8993	4.94249	9.97038	9.41954	7.57128	4.90187	3.48089	8.98543	7.97318	11.7092	9.73246	6.02565	10.7261	7.17409	9.49665	12.361	3.35163	6.61097	10.0304	9.37728	6.93289	5.62888	8.02946	9.49171	6.14305	12.5797	7.67891	4.57263	6.28469	10.5854	5.38257	7.24175	11.5413	3.70284	5.21976	9.08069	4.69972
122	control	African	10.2018	6.73623	8.69112	9.77159	7.27058	12.1279	11.2038	6.44209	9.01584	3.99112	11.5048	6.01061	10.368	8.21329	8.29633	5.22869	3.81664	8.66712	7.72215	12.2213	10.0238	6.62497	12.5433	7.26884	10.0788	12.6394	3.8165	6.87805	9.01262	10.1219	7.73644	5.74656	8.85849	9.42457	6.64398	13.1007	7.13134	4.66644	7.70457	11.0698	6.00064	8.65919	12.2077	3.49472	5.94152	9.2338	4.06685
123	control	African	13.3401	7.18922	8.88028	9.38438	8.16654	12.2395	11.1802	5.28716	9.44417	6.57341	12.058	6.63273	11.7229	8.94516	9.96592	5.51107	4.56177	9.54564	7.7766	12.8549	10.3948	8.85058	11.6378	8.04349	9.58865	12.5179	4.29992	6.5334	10.0022	11.3353	8.05091	6.26377	8.6444	10.0471	7.69602	12.1564	6.83165	5.15768	6.96278	11.3762	6.43055	10.9941	12.3818	3.14943	5.69345	9.16228	5.15498
124	control	African American	6.00029	6.07576	8.57813	10.1717	6.6206	11.5135	11.3503	7.0553	8.92585	4.39476	10.8063	5.29786	9.99969	8.66932	7.75434	4.55616	3.34921	8.67131	7.66152	11.6237	10.39	6.45875	11.1128	6.59935	9.68702	12.5848	3.36478	7.01775	8.16753	9.37848	7.40261	5.92373	8.52273	9.79425	6.25596	13.3713	6.91803	4.07869	6.76132	10.5858	5.39995	6.83177	12.0729	3.92332	5.44793	8.93407	4.71692
125	control	European American	14.4918	7.21584	8.67689	9.61796	6.82663	12.1218	11.2596	5.8708	9.15438	8.324	14.2892	5.53027	10.6979	8.34654	10.0587	5.92364	3.72997	8.97378	7.28427	12.6907	10.5561	5.43287	12.6698	7.96948	9.99939	12.5077	4.02296	6.56733	8.44174	12.2986	7.7192	6.03647	9.19737	10.5301	6.31326	13.2381	8.09338	5.06144	7.50362	11.7696	5.72194	12.1534	11.7626	4.5187	6.55012	9.41372	5.11245
127	control	European American	7.90085	7.03954	8.85983	10.5253	6.84439	12.1857	11.7212	8.21353	9.02027	5.03953	12.677	5.29646	11.7989	8.97273	8.50082	5.23631	3.81122	8.83516	7.9036	12.0428	9.58538	4.61089	11.3066	8.10901	10.6157	12.6162	4.34445	6.86425	7.64972	9.21146	7.55123	5.78507	8.78529	9.54831	5.83574	12.5077	7.35923	3.97423	7.30312	11.1609	5.64973	6.83228	11.9733	4.08214	5.67679	9.5219	4.91561
128	control	African American	6.86343	6.31529	8.64676	9.78964	6.39489	11.0986	11.3353	6.92146	8.675	3.55474	11.5383	4.92539	9.94614	8.79541	8.10981	5.53653	3.32053	8.67027	7.94889	11.6194	8.51326	5.80889	12.5309	6.49486	9.86943	12.6186	3.43795	7.18232	8.3066	9.29298	7.31533	5.38989	8.79415	9.00489	6.04619	12.3941	6.90425	4.47895	6.44606	11.5525	5.84581	6.85007	12.1179	3.50218	5.45549	8.96048	3.95258
129	case	African American	7.13858	7.21274	8.88403	9.22893	6.78397	10.3071	11.1338	6.28358	9.23323	3.53327	11.1559	5.67313	10.2164	8.68973	8.92329	3.65505	3.7873	9.0074	7.89323	12.0839	9.69841	6.32484	12.3696	6.67455	9.61307	12.6276	3.72811	7.11971	8.85684	9.15376	7.84075	5.72757	8.91577	9.26965	6.44685	13.456	7.02043	5.00533	7.7193	11.3824	5.8412	7.06148	12.4437	4.097	5.50081	9.38664	5.43263
131	control	African	11.6688	7.53831	9.03581	9.62996	8.33335	12.4649	11.2263	5.96744	8.95526	4.38999	11.1176	6.40921	10.5526	8.84648	9.07439	5.41059	4.21154	9.49265	7.86635	12.6584	11.0683	9.44738	12.1277	6.89252	10.0117	12.6863	4.47699	6.67267	9.41748	11.4554	7.81593	6.07712	9.40908	9.52947	7.42424	13.5333	7.41429	4.7583	7.19279	10.9398	5.86588	9.41227	12.1642	3.50089	5.59368	9.03902	4.94106
132	case	African	10.1348	6.75988	10.0219	7.60105	7.7788	12.1215	11.0345	5.7002	8.50293	4.5645	10.5123	6.91561	10.7099	7.2668	10.5512	5.36348	3.99474	9.47577	7.71052	12.1854	10.9863	9.33354	11.7949	7.10361	9.26445	12.5132	4.19792	6.29305	8.03691	9.73184	7.62289	6.31103	8.91011	9.62678	7.822	10.0771	6.41175	5.26261	6.3208	11.9119	6.18788	8.96593	12.19	2.97573	5.78	8.59516	3.64747
133	case	African American	8.1045	8.75923	8.69768	9.37003	6.46031	10.2595	10.8337	6.48274	11.4587	4.43027	12.0735	5.90402	9.66078	8.63057	10.5448	5.85642	3.47865	10.0899	7.66233	14.1569	9.70912	5.75965	12.518	6.63759	9.02026	12.447	4.46187	6.36808	7.37465	8.48348	7.89139	7.52305	10.3052	10.2322	6.72793	13.0462	8.61874	5.05487	8.82259	13.3206	6.75539	7.78267	12.2992	5.81095	6.48639	9.64256	6.90154
134	control	African American	6.66933	6.87531	8.58753	9.73825	6.65758	11.4911	11.3769	6.34428	8.99817	4.07148	11.2923	5.89096	10.4008	8.858	8.49998	5.37966	3.39831	9.15015	7.75185	12.0572	9.16829	6.19891	11.6648	6.61015	9.75249	12.6275	3.67	6.83134	9.15918	9.65608	7.51581	5.724	9.20947	9.35398	6.77568	13.3731	7.10225	4.84823	6.42436	10.9214	5.80879	8.10831	12.0937	4.21637	5.60711	8.79832	4.3915
136	control	African	8.94006	6.44837	9.1155	9.12957	6.77757	9.61705	11.0507	5.78308	8.78821	4.63258	11.6457	5.8289	10.1372	8.38016	10.2121	5.14814	4.05178	9.11889	7.56031	11.8721	10.5496	7.90415	11.822	6.46489	9.57829	12.5617	3.67322	5.92122	9.1873	9.74098	7.34491	5.99548	9.60849	9.09617	6.85123	10.3962	7.2591	5.33648	7.18013	10.8101	6.07444	8.53281	11.9497	2.61661	5.57294	8.80012	3.8927
138	control	African American	13.8598	6.32925	8.73995	9.91086	6.91945	12.6186	11.348	5.78009	8.9696	4.24158	12.5407	4.78151	10.8523	8.93506	7.87851	5.37404	3.79974	8.72258	8.08267	12.6788	9.51959	8.12851	11.2741	8.49324	10.0437	12.6761	3.27061	6.60251	8.95886	11.3825	7.89428	5.79878	8.19457	9.78059	6.52266	12.5114	6.662	4.80691	6.57928	10.5128	5.27568	9.18383	12.2308	3.47244	5.74231	9.1341	4.47883
139	control	African	11.855	6.58571	8.2738	9.35358	7.55154	12.386	11.198	5.96335	8.83969	3.97696	11.1385	5.58973	9.39225	8.85593	8.80245	4.8127	4.10666	8.96075	7.45789	12.3678	9.6743	9.25589	12.3154	7.541	10.272	12.6281	3.79537	6.51174	8.94666	10.4805	7.61555	5.36828	8.55499	9.31713	7.37894	12.7106	7.48819	4.65075	6.49168	10.8499	5.9967	13.8446	11.7203	3.56454	5.55544	9.00958	4.59882
140	control	European American	7.80525	6.12096	8.61411	9.62081	6.34041	12.0334	11.0349	6.23226	8.75993	4.56123	12.1589	4.74275	9.81584	8.26472	6.93539	4.58427	3.67049	8.42604	7.75713	11.3005	8.99874	5.27235	10.1644	7.05667	10.0309	12.6415	3.4113	6.99833	8.64044	8.71893	7.42484	5.13427	8.33896	9.13161	5.75386	12.8133	7.0047	4.56173	6.59105	11.7462	5.0776	6.79582	11.9505	3.64542	5.75986	9.15811	4.40747
141	control	African	11.3072	6.89425	9.20638	9.93395	7.08078	12.2244	11.5754	7.02259	8.86427	4.87746	11.0423	6.48229	11.4302	8.1981	9.62896	5.38285	4.12711	9.19508	8.02973	12.0442	9.75465	8.71441	13.0338	8.14459	9.894	12.42	4.37735	6.46971	9.62026	11.087	7.55582	6.10876	8.84397	9.87089	7.09862	9.80774	7.30371	5.20956	6.68734	10.4154	6.2509	10.6958	12.3686	4.03961	6.21719	9.27061	4.45143
142	case	African American	7.18067	5.89536	8.66602	9.38285	7.037	11.3324	11.0808	6.66211	8.8962	5.79791	11.8537	4.90242	11.9757	8.79516	8.09302	4.76114	3.75301	8.86153	7.84931	11.9009	10.4057	5.71362	12.6852	6.53343	9.54965	12.4397	3.58711	6.47228	9.89542	9.84689	7.72827	5.27501	8.68515	9.35436	6.18496	12.3508	6.87215	4.83988	6.74403	11.0877	5.70288	7.45883	12.4417	3.67001	5.5722	8.90251	4.29755
143	case	African American	7.47871	7.02305	8.48749	7.85843	6.53827	9.06285	10.5858	6.39398	8.66635	3.18629	11.1007	5.89968	9.62901	9.11089	9.13895	5.3	3.92801	8.20874	7.606	11.8117	9.82069	6.82705	11.2801	4.81307	9.70291	12.3515	4.34886	6.97464	8.76307	9.26107	7.02232	5.68413	8.76596	8.88828	6.71669	12.5735	6.73754	4.40323	5.63867	11.1219	6.18583	7.52151	11.4526	3.5879	5.14576	8.83353	4.85729
144	case	African American	14.615	6.56313	8.64568	9.96367	7.01318	12.3728	11.2603	6.67464	8.88705	5.05386	12.9877	5.51033	10.0184	8.18272	8.06031	4.49601	3.50978	8.74459	7.88167	12.9384	9.44135	6.15283	11.3267	8.38736	9.72771	12.53	3.39443	6.54122	9.36521	10.9611	7.58262	5.49204	8.38783	10.2572	6.42691	12.0038	6.63953	4.7326	6.6901	10.418	5.43811	9.67404	11.9825	3.99178	5.44618	9.06986	4.66413
145	case	European American	8.15881	6.11334	8.22538	9.82319	6.42641	11.3068	11.0383	7.62625	8.33518	3.25806	11.862	5.0765	10.1084	8.615	7.63861	5.27153	4.18609	8.79797	7.31864	11.5706	10.0325	6.3764	10.3512	7.55038	9.49801	12.5958	3.40834	6.12224	8.85472	9.16693	6.98252	5.03874	7.99454	9.54199	6.13529	13.3687	6.64585	4.10414	6.4973	11.3112	5.22127	6.72451	11.2777	3.39395	5.4814	8.56614	4.41489
146	case	African	11.2257	5.8247	10.7999	6.8522	6.55816	12.1542	10.7038	6.18592	8.03251	4.82215	10.5286	4.28744	10.2124	7.18942	7.22845	4.13351	2.14849	8.8441	7.1663	12.1246	8.95242	4.44713	11.1246	6.41499	6.26912	12.0291	3.5034	5.69949	7.13256	9.17739	6.58711	5.81189	8.75198	8.84537	5.14288	9.86879	6.57009	4.71436	6.11416	9.62823	5.15018	9.03333	11.597	2.93917	5.35551	8.59533	3.6152
147	control	African	7.0449	6.60127	9.14134	7.89832	7.20829	10.0274	11.3801	6.73091	8.67839	3.86244	11.1576	6.30185	10.2225	8.23191	9.21	4.61322	3.5374	9.05275	7.84614	11.1147	10.1189	7.95124	12.6727	5.78672	9.6811	12.6347	3.93975	6.32456	9.15971	8.73908	7.41839	5.82971	8.83697	9.05902	6.45331	10.7265	7.09057	4.94194	6.42598	10.1246	5.69002	7.17971	12.2582	3.51343	5.74127	8.81351	4.31513
149	control	African	7.36932	6.45376	8.65236	7.73223	6.04447	9.50816	11.1677	6.56171	8.80624	4.14631	11.4881	6.52763	11.0814	8.41855	9.41903	5.59501	3.11249	8.74009	7.67135	11.6965	9.27868	6.48212	12.323	5.33498	9.64821	12.5098	4.71678	6.48085	8.78909	9.9697	7.56877	5.5978	9.34768	8.79139	6.44351	10.6139	7.4706	5.36818	6.40882	10.8259	6.01972	13.8909	12.1295	3.30638	5.91158	8.94911	4.24348
150	case	African	11.2046	5.85683	10.1946	7.63991	6.29988	12.3216	10.8203	5.77484	8.15322	4.72441	10.9424	4.84437	10.8092	6.89364	7.79384	4.71664	3.25805	8.48661	7.45631	11.3778	9.20752	7.61179	11.3667	8.06427	8.73526	12.3715	3.07287	5.09649	8.85137	9.3153	7.69025	6.68767	8.278	9.29832	6.23912	9.47416	6.88055	4.91996	5.76728	9.96918	5.33762	8.76134	12.219	2.77286	6.13378	8.56638	3.41793
151	case	African	9.4524	7.0933	10.5888	6.67872	6.33222	12.171	10.9305	5.68008	9.32673	4.58924	10.4418	5.03256	9.0943	6.79594	9.32273	5.48598	4.26429	9.48718	6.99946	12.0457	9.21036	6.21002	11.8839	6.7455	8.23189	12.3803	3.48389	5.52005	8.18602	9.18869	7.34095	6.72882	9.44879	9.57	5.87833	9.81313	7.05395	4.04167	7.20677	10.0865	5.81696	7.91018	12.1716	3.3985	5.50228	8.67368	4.23391
152	control	European American	9.1176	6.27139	8.24358	9.63282	6.51031	11.7632	11.2903	6.51126	8.44281	3.64215	12.6181	5.05388	10.2557	8.26471	7.59759	4.2632	3.64397	8.54207	7.76425	11.9765	9.41299	4.96156	11.065	7.17872	9.86217	12.2943	3.48446	6.74005	9.05849	8.36456	7.1407	5.10698	8.29174	9.50373	5.69885	13.0965	6.60388	3.90619	6.63027	10.4935	5.37992	6.95673	11.5189	3.74785	5.19965	8.89287	4.46049
153	control	African	9.24214	6.35587	8.76909	9.73777	6.71527	12.0576	11.4566	5.95368	8.89777	4.07475	12.5806	5.31947	9.74822	8.34712	8.32844	6.67118	3.65512	9.01821	7.94898	12.083	9.90089	5.90329	11.1926	7.56628	10.0144	12.6608	3.89539	6.59693	9.07392	9.03582	7.69007	5.74653	9.02902	9.26212	6.18716	11.6422	6.85965	5.09773	6.75354	10.5695	5.79814	7.63608	12.3332	3.93713	5.66054	9.01752	4.55449
154	case	African American	7.69751	6.48374	8.39099	9.2735	6.2256	11.4169	10.798	6.5905	8.81875	4.34905	12.8324	4.66189	10.8286	8.80973	8.25273	4.25291	3.70728	8.98642	7.3776	11.7782	8.94125	5.20238	11.0938	7.03039	9.40159	12.2654	2.88157	5.90939	9.39499	8.87049	7.21313	5.37354	9.1256	9.0453	5.79388	12.3067	7.67567	4.41342	6.41269	10.8932	5.27337	7.1114	12.143	4.03553	5.22429	9.07762	5.08091
155	case	African	14.438	6.39479	10.6958	7.73557	6.93347	12.887	11.2214	5.40811	8.62867	6.43085	13.2331	5.08372	9.53586	7.5794	8.75473	4.96133	4.81512	9.37091	7.94871	12.4334	8.96468	8.97174	11.8187	8.86313	9.41028	12.6065	3.52141	5.08126	8.88729	10.8773	7.55616	6.44524	8.67409	10.118	6.83995	9.56389	6.6816	5.18449	6.42525	10.0735	6.27834	10.8975	12.4271	2.75178	5.95057	8.58613	3.98105
156	control	African	12.0822	6.16608	8.86237	9.73966	6.88142	12.3421	11.1956	5.72414	8.79413	4.94341	11.6767	5.05525	10.8033	7.78231	7.48297	5.33764	4.68212	9.21501	7.81073	11.9729	10.2294	7.52606	12.3852	6.64368	9.29667	12.6553	3.93396	6.44462	9.99075	10.4858	7.92777	6.26988	8.91129	9.41512	5.98103	9.89998	7.0094	4.94829	6.70707	10.4677	5.39187	9.37028	12.1328	3.07147	5.47774	9.20961	4.23467
158	control	African	7.91841	8.02107	8.5982	9.23151	7.76489	11.9615	10.8368	5.90571	9.01665	3.73789	11.0266	7.35112	9.76695	8.58207	8.80836	5.31981	4.4162	9.26882	7.47341	12.2188	10.972	7.07675	11.9632	6.44981	9.89903	12.4252	4.63972	6.99807	9.18008	9.08434	7.57502	6.08899	9.01022	8.84918	7.21749	12.4868	7.19425	5.31357	6.79849	10.8915	6.24874	7.89014	12.0428	3.07563	5.47822	9.10375	4.7478
160	control	African	9.29402	7.92846	8.79435	9.16259	8.38159	11.6776	11.012	6.77943	8.82173	4.0657	11.3822	8.18373	10.2238	9.11264	11.0604	4.45199	3.80892	9.52254	7.79045	11.9651	9.86429	8.08386	12.2319	6.68566	10.0414	12.6011	5.77595	6.57527	9.72545	9.56888	7.64943	5.78516	9.65584	9.0251	7.43635	12.5007	7.42961	4.84724	6.54414	11.0134	6.16554	9.21589	12.163	3.13632	5.30692	8.90333	4.63746
161	control	African American	6.94833	6.00991	8.609	9.04199	6.53307	11.263	11.0389	5.58593	8.92086	3.77858	11.4204	5.13416	10.6427	8.71362	7.52352	5.18056	3.40542	8.24262	7.73661	11.683	9.55936	7.08327	11.8186	5.90278	9.66332	12.4559	2.90287	6.57165	9.06883	8.38305	7.48126	5.16156	8.12744	8.90488	6.47468	12.9869	6.89655	4.21687	6.93174	11.6724	5.22681	7.31644	12.2807	2.52045	5.68186	8.94215	4.37791
162	case	European American	8.16062	5.97818	8.53282	9.45225	6.56793	11.6784	11.0518	6.20514	8.93281	3.7596	12.328	4.63808	10.0814	9.0719	7.25471	4.61026	3.22237	9.18861	7.80924	11.6821	10.8669	5.30851	10.4269	7.16359	10.0942	12.3833	3.9932	7.10911	8.75416	8.86499	6.97566	5.1077	8.32244	9.24857	6.0494	13.2387	7.1534	4.36739	6.30345	11.0116	5.18862	8.30371	11.9763	4.16357	5.79621	8.94975	4.83814
164	case	African American	6.63109	7.18752	8.42036	9.59263	6.42702	11.1433	11.2863	6.93782	8.97317	3.92044	12.5413	5.60342	10.0572	8.96796	8.30945	5.63801	3.24532	9.1091	7.35399	11.9182	9.42678	4.76703	10.0956	6.32918	9.74521	12.5854	4.29253	6.26185	8.98328	9.14281	7.31984	5.69708	9.70085	9.49987	6.03656	13.0194	7.23758	4.59953	6.69976	11.6389	6.01859	7.11529	12.1447	4.53085	5.44002	9.40407	5.13503
165	case	European American	7.66377	5.45642	8.43173	8.99731	6.62413	9.42142	11.3222	7.05719	8.82375	3.68505	12.276	6.23439	10.0404	9.0002	8.78831	5.32309	3.51416	9.25129	7.73103	11.7415	9.60073	6.6411	11.0176	6.71113	9.97221	12.523	3.81112	7.45935	8.43449	9.00894	7.44842	5.51199	8.54315	9.16191	7.23063	12.6076	7.05594	3.97574	6.36255	11.8134	5.50228	6.97614	12.0642	4.34643	5.49193	9.00704	4.55063
166	control	African	12.08	7.31753	8.88526	9.48864	7.34956	11.3632	10.9232	5.5528	7.74397	6.9571	11.0915	6.43878	10.3825	8.25517	8.87487	5.98128	4.29559	9.24022	7.54296	11.6465	10.911	8.07451	12.2223	6.84272	9.83339	12.5837	4.08502	7.39306	9.14926	11.7679	7.0434	6.21483	9.19538	9.10017	7.45271	10.0246	7.18212	5.30263	6.26844	10.3417	6.39848	12.5573	11.7451	3.77568	5.23626	8.82579	4.27905
167	control	African American	7.19757	6.05765	8.82415	9.594	6.85271	11.9604	11.1055	5.98565	8.99849	3.67761	11.4374	5.38483	9.51009	8.59558	7.34113	6.17438	4.49041	8.7559	8.00234	12.0862	9.74622	5.28847	11.1282	6.34926	10.1183	12.5002	3.73538	5.95672	9.2831	9.33523	7.6602	5.2679	8.62668	9.38562	5.57329	12.9608	7.38671	4.69357	7.17935	10.5505	5.22552	7.27056	12.0057	3.43402	5.89809	9.27721	4.73763
169	case	African American	6.6953	6.19265	8.29679	8.56998	6.61485	9.55417	11.1453	6.20854	8.74034	3.95168	11.8669	6.32295	9.00737	9.12287	8.10867	4.03557	2.91603	8.88649	7.5761	11.3926	8.84311	6.86186	10.4604	6.24207	9.4824	12.3487	2.60778	6.61587	8.41047	8.68878	7.27853	5.26894	8.72943	9.154	6.68456	12.8792	6.79916	4.59594	6.3098	10.7118	5.81823	6.21767	12.0686	3.40622	5.43147	8.84459	4.08814
170	case	African American	6.38484	5.68395	8.52382	9.79177	6.3781	11.45	11.2634	6.27083	8.5914	3.3159	12.1054	4.97237	8.33238	8.43332	6.82018	4.64668	3.58436	8.25436	7.61331	11.8491	8.70709	4.58313	11.569	6.31534	9.86665	12.6121	2.77275	6.19313	9.60257	9.10047	7.27009	6.2707	7.86239	8.83264	5.88569	12.7287	6.9288	4.3434	7.00311	10.2137	4.94976	7.44886	11.9488	3.35177	5.65951	9.03527	4.04975
171	case	African	7.93121	9.60166	9.07819	3.92176	7.16284	9.77229	10.0628	4.97876	11.2319	7.40332	11.4116	6.40592	10.3868	7.63679	10.3347	6.78308	3.96289	9.35938	7.93922	14.0175	9.03917	5.81237	11.2919	7.3181	8.94429	12.0647	4.96428	6.58169	7.82624	8.93204	7.0799	7.20496	10.5512	9.95126	5.90242	11.283	7.88897	5.45099	9.1294	11.7061	7.52737	7.60047	12.3816	5.73765	5.66611	9.83811	5.79518
172	control	African	11.1138	6.30291	8.44181	9.58862	6.51179	12.1759	11.3809	6.82276	8.71203	5.32751	11.3128	5.39967	10.6556	8.47	8.23538	4.86831	2.90524	9.00193	7.70048	12.2654	9.25307	6.93604	12.4932	7.98762	9.34902	12.6746	3.27173	6.56661	9.36648	11.0792	7.43022	5.35843	8.24192	9.41052	5.92328	12.1045	6.92696	5.16817	6.50792	11.4644	5.34642	13.5611	11.9542	3.47076	5.7417	8.93139	3.83436
173	control	European American	6.84201	6.7558	8.11638	8.49288	6.34994	10.3446	10.8926	6.87001	9.1366	3.56287	11.8354	5.02727	9.62196	8.63263	7.75523	5.44662	2.79603	8.64284	7.16501	11.3005	9.51903	4.78224	9.71246	5.98838	9.2922	12.4513	3.65077	5.84878	8.34767	8.30548	7.20269	5.32854	8.9752	9.04845	5.91592	12.3785	6.84962	4.28398	6.82591	10.9796	5.5676	6.48674	12.0059	3.47291	5.67874	9.04993	4.59679
174	control	African	12.097	6.07352	9.13826	10.3156	7.00484	12.118	11.0288	6.78716	9.05315	4.20619	11.484	5.68682	10.4144	8.31398	9.81398	7.20391	3.94854	9.16266	7.41683	12.6807	10.4182	7.75658	11.8289	7.1917	9.39643	12.5624	3.73882	5.51471	7.93283	10.1936	7.62643	5.16921	8.77986	9.66966	6.49863	13.2875	7.01129	4.97638	7.711	10.789	5.48951	9.10354	12.5628	2.64729	5.89213	9.21522	3.64728
175	control	African	14.0866	6.50164	9.01756	9.77619	6.79989	12.1913	11.0908	5.74348	8.9073	6.5397	12.7765	5.88694	9.41456	8.14934	8.62777	4.76162	3.3772	8.61116	7.94951	12.3741	9.98928	6.724	11.7856	6.87841	9.38751	12.5905	3.15838	6.05826	8.62996	10.0376	7.64061	5.74347	8.87149	9.35556	6.16089	12.3779	7.11421	4.53586	6.60025	10.1676	5.44658	10.2383	11.3422	3.23611	5.51269	8.97113	4.25347
177	control	European American	15.1181	6.58074	9.08891	10.5488	7.08204	12.5044	11.5239	7.09305	9.24832	4.40837	13.0256	5.36849	10.2985	9.1241	7.84716	5.59503	4.39229	9.68312	8.1778	12.8212	10.2578	9.47995	11.3846	8.90082	10.7262	12.8022	3.5783	7.34551	9.49232	10.3928	8.09364	5.91608	8.8452	10.605	7.35279	12.7451	7.24494	5.32861	6.79269	11.1106	5.31983	9.24312	12.5239	4.12545	5.85716	9.33317	5.10882
179	control	European American	8.82084	6.72643	8.77905	10.2407	6.8865	11.8727	11.2688	6.42331	9.25748	3.60363	12.5737	6.39024	11.0215	9.19775	8.39661	6.72902	3.91042	8.73334	7.8874	12.4164	9.60398	5.58917	10.8868	7.09225	10.581	12.4619	4.54925	7.13854	8.77889	9.16611	7.81416	5.78002	8.72646	9.89563	6.30356	13.1435	7.5866	4.93972	6.59606	11.5772	5.88915	8.54338	11.909	3.86113	5.7104	9.32751	5.3343
180	case	African	12.332	8.13472	10.5425	7.51457	7.29609	12.829	10.9334	7.11433	10.1101	5.49914	11.3197	5.74615	11.0784	7.98149	9.96064	5.58447	4.08629	9.68214	7.68402	13.1728	10.0266	6.68424	12.5597	7.99716	8.75508	12.2902	4.61536	5.69952	9.0716	9.80151	7.58831	8.05203	10.3513	10.5763	7.43668	9.60088	7.16338	6.20493	7.98275	11.1813	7.09613	10.2845	12.3655	5.05392	5.99869	9.479	5.47454
181	control	African	11.4303	7.72338	9.13403	9.17694	8.08159	12.1805	11.196	7.44371	9.02907	4.98302	11.4801	7.2997	11.8772	8.99379	9.92331	6.28602	4.04739	8.91171	7.76843	12.1543	10.6704	8.77981	12.2971	7.26373	10.503	12.5179	4.85513	7.25966	9.84878	11.147	7.76093	6.45401	9.18705	9.39985	7.81533	12.0209	7.79136	5.10335	6.93606	11.2925	6.23517	10.3668	12.1133	3.62271	5.6833	9.13258	5.16222
182	control	African	9.5922	7.52906	9.39294	7.05486	8.87976	9.92915	9.04472	4.44201	9.46572	6.64977	11.6863	8.17295	9.22175	7.97269	10.6686	9.26117	4.82454	9.44045	7.67329	12.4376	9.45163	10.2736	9.51373	6.44418	9.95451	11.4821	5.06219	7.70853	8.24159	10.024	7.40427	6.30189	9.5561	11.809	8.60084	12.7567	7.78642	5.91177	8.3812	11.3314	6.72787	9.06303	12.26	3.2748	5.87265	9.69702	5.15053
183	control	African	11.4137	6.34181	8.87785	9.73819	7.24512	11.5155	11.0919	6.47442	9.20151	6.24178	10.713	6.59478	10.3608	8.42777	8.6172	7.43129	3.64268	8.82992	6.55396	12.0669	9.9171	7.54971	11.873	7.31665	9.41058	12.4301	3.75111	6.2623	7.53782	9.76962	7.31686	6.2344	9.48574	9.85858	6.99217	11.2157	7.43872	5.44183	6.46974	10.5894	5.64375	11.272	11.7605	3.50526	5.80529	8.82957	4.60921
185	case	European American	9.68538	6.1512	8.56633	7.61721	5.98413	11.5405	11.0852	5.57295	8.51891	3.6984	12.2543	4.82252	10.5691	8.26145	8.4905	4.86098	2.79106	8.81014	7.70658	11.7787	9.83286	5.34463	9.85492	8.00995	9.7374	12.6826	3.38228	5.69833	6.19265	9.07912	7.31126	5.14111	8.15172	10.1813	5.92677	13.0574	6.74463	4.12951	6.48619	10.6183	5.02745	7.96195	11.8748	3.08199	5.52517	8.88448	4.71369
186	case	European American	7.98674	6.50104	8.51928	9.25266	6.57748	11.2109	10.8545	6.1297	9.28997	4.48662	12.379	5.96081	9.97093	8.66621	9.53857	5.37561	3.04954	9.35978	7.41973	11.8448	8.4007	5.64079	10.7088	7.02701	10.7762	12.4647	4.31301	7.018	10.068	8.87633	7.50256	5.74262	8.87323	9.13175	6.12774	12.5199	7.0986	4.75688	6.93981	11.1194	5.56606	7.72537	11.9748	4.00186	6.30637	9.32234	4.54436
187	control	African American	7.65279	7.399	8.4469	9.36471	6.83611	10.6684	11.1846	7.02717	9.40049	4.2124	11.8388	5.27617	10.4568	9.05961	7.4939	3.99673	3.86023	9.50814	7.68173	12.0196	9.57494	4.91318	11.5527	5.953	9.32214	12.6113	3.98323	6.52382	9.36099	9.0034	7.78651	6.21429	9.37924	9.3502	5.99811	12.6321	7.50678	4.38779	7.33688	11.0257	5.54823	7.30627	12.6132	4.47456	5.52404	9.37134	5.28306
189	case	African American	7.27768	6.11113	8.10196	9.31968	5.74765	11.3158	10.7728	6.78534	8.42431	4.40863	11.0702	4.20633	8.02029	8.04971	7.13627	3.89069	3.27457	8.86217	7.37892	11.2841	8.12518	4.12125	11.6115	6.28749	9.19588	12.3753	3.64488	5.91614	8.00483	8.07464	7.24249	5.1652	8.09409	8.88271	5.29107	12.439	6.83478	4.43658	6.04282	10.7344	4.43136	6.88864	11.4451	3.42866	5.40386	8.72279	4.24395
191	control	African	9.84902	6.1073	9.36595	8.35054	6.98922	10.8595	10.0885	5.84822	8.67648	7.01819	11.6589	5.38243	8.26215	7.16064	8.68281	6.26377	4.26375	8.77173	7.65646	12.2271	10.5325	6.81655	10.9238	6.87098	8.74201	12.0692	4.34918	6.08361	9.09707	8.92884	6.94916	6.98917	9.39182	9.62354	5.81698	13.4681	7.94699	4.50541	7.59589	10.9383	5.33312	7.52844	12.5124	3.22791	5.98175	9.48709	3.92664
193	case	European American	7.18519	6.46401	8.62539	8.01218	5.92058	10.8274	10.8246	5.70637	8.75861	3.7498	11.76	5.23812	9.14425	8.38371	7.54401	5.22864	3.13151	9.09107	7.63705	11.3258	9.03813	5.10696	10.0495	6.76709	9.58093	12.5363	3.3152	6.93436	8.71112	8.18025	7.51416	5.29373	8.0987	9.66197	6.54758	12.3798	7.01313	3.85242	6.49418	11.062	5.20091	7.46046	12.3406	3.62467	5.62535	8.78664	4.67806
194	case	African American	7.02574	5.86641	8.89215	8.60866	6.58041	10.4531	11.2363	7.00536	8.94075	3.90303	11.7356	4.76292	11.7875	8.47705	7.67054	5.17674	3.52849	7.78014	8.0602	11.5659	8.23996	6.18427	12.4259	5.4388	10.01	12.6584	3.11206	6.65615	9.59382	8.76818	7.42265	5.28432	8.21954	8.58481	6.05818	12.3861	6.99945	4.70706	6.58788	11.2035	5.33879	6.55719	12.3417	3.26004	6.30809	9.01912	4.46376
195	control	European American	7.73615	6.24547	8.41112	9.62672	6.77585	11.2736	11.2783	7.44002	8.79391	3.27759	12.2498	5.12599	10.3021	8.68312	8.23122	5.04429	3.41554	8.74887	7.89556	11.7981	9.35961	5.7966	10.2613	5.7399	10.1138	12.5812	3.87157	7.20423	8.50246	9.43473	7.43505	5.43161	8.06517	8.64273	6.24092	13.2787	7.10964	4.05684	6.99378	11.4041	5.36066	7.547	11.6985	3.93808	5.79859	9.03804	4.71667
196	case	African	8.09265	6.16114	10.893	9.00928	6.71834	12.3868	11.0597	5.63966	8.32402	3.36117	10.7524	3.59272	9.32822	6.37847	7.51851	4.33151	1.03863	8.72471	7.23254	12.0562	7.29356	2.85114	10.3894	6.65859	5.93343	11.8045	3.42834	4.36053	7.05697	6.62589	4.95728	6.91965	8.95255	9.12721	5.57512	9.14753	5.91481	4.67556	6.92364	10.0075	5.41359	3.92906	10.1451	2.68514	4.69125	8.49114	3.74279
197	control	African	10.6817	6.79252	8.90243	8.76324	7.33848	11.5378	11.0312	5.75364	8.865	4.19807	10.604	7.0385	9.74524	8.15129	7.90324	4.9085	4.00906	8.95258	7.64183	12.1621	10.0046	7.79667	11.7662	6.09598	9.58035	12.5054	3.51247	6.42242	8.32354	8.70361	7.59588	6.22999	8.98295	8.50925	7.24419	11.467	7.52282	5.14928	7.12959	10.9207	5.12729	8.42413	11.7069	3.04825	5.41624	9.01328	4.14573
200	control	African	7.97193	6.21997	8.93808	8.99416	6.36463	11.1672	11.0125	6.05282	8.81222	3.18255	11.1831	5.18238	10.0313	8.38135	8.50508	5.82635	3.48441	9.21235	7.799	11.5182	7.19448	6.913	12.315	5.30049	9.72905	12.6486	3.61253	6.4048	9.44101	8.317	7.61694	5.72092	9.11077	8.98946	6.27492	10.31	7.91189	5.60072	7.2528	10.2516	5.2621	7.76441	12.1502	3.37238	5.40419	8.86245	4.05082
201	case	African American	7.18666	6.56059	9.04993	9.4426	6.8654	10.8416	11.3095	6.83383	9.52521	3.20883	11.7452	4.55835	10.9816	8.99576	8.02799	4.57275	4.00366	9.07813	7.84357	12.2148	9.36947	5.41192	11.9165	6.67701	10.132	12.772	3.5658	6.89886	9.95548	10.1538	7.63724	5.34787	8.60333	9.16034	5.99999	13.1424	7.93705	4.93919	7.17758	11.3417	5.8113	8.18301	12.0291	4.12246	5.78707	9.44382	6.64645
203	control	African	8.42963	5.88489	8.90597	9.65579	7.09775	11.8	10.8938	5.24291	8.60097	3.56607	11.0993	6.03158	9.70573	8.41784	8.58974	5.38958	3.59938	9.02012	7.54916	12.0685	9.13188	7.24713	12.0836	6.17072	9.97165	12.3876	3.5617	6.7274	9.08923	9.32668	7.70297	6.02283	8.69572	8.85648	6.55378	10.902	7.76732	4.373	6.44903	10.5211	5.60197	7.82421	12.1149	3.58599	5.66857	9.12919	3.97811
204	control	African	8.67799	6.51036	9.26562	10.5039	7.84035	12.1198	11.3557	7.25453	9.25458	4.96033	10.8875	6.55741	9.80217	8.52983	8.80124	5.62124	4.90018	9.68592	7.87178	12.0028	10.789	7.36895	12.0214	6.5039	9.82794	12.6149	3.71809	6.87227	9.49502	10.3588	7.49097	6.42751	9.06405	10.1629	6.75294	13.0968	7.05223	4.67686	6.89627	11.1838	5.83232	9.15624	12.2189	3.13541	5.69215	9.06855	4.82641
205	control	African	7.65632	6.32735	8.81518	9.69272	7.02603	11.4211	11.2966	7.69353	8.98406	4.48775	11.2672	5.74465	11.0269	9.01059	8.38227	5.64349	3.93076	9.09706	8.22148	11.8574	9.67794	8.16717	12.7247	6.82406	10.4453	12.4586	3.84788	6.03711	8.58089	8.98727	7.64449	5.57013	9.03334	9.39129	6.80556	13.0069	7.05769	5.69944	6.92385	11.0482	5.63033	6.82323	12.3484	3.27981	5.94926	8.92644	4.52373
206	control	African	7.93913	6.60068	8.9248	9.60489	7.00679	10.8421	11.2617	6.56277	8.69792	4.18872	11.2254	6.47247	10.5274	8.59219	9.27742	5.59975	4.22566	8.42536	7.8153	11.759	9.81308	7.29216	12.0642	6.03585	9.98714	12.6401	3.94056	7.02284	9.32338	9.4488	7.30203	5.78629	9.47769	8.94604	6.81123	12.4377	7.72998	5.08918	6.69547	11.3121	5.65434	8.23302	12.0047	3.69611	5.75257	9.08183	4.54333
207	case	African American	9.41172	7.21747	8.41622	8.06437	6.14727	9.30209	10.931	6.89353	9.78837	4.31281	12.2659	4.97642	9.5976	8.78638	12.2615	6.63808	4.15783	8.8621	7.70441	12.1575	9.34932	4.22935	12.4447	4.18162	9.26207	12.6546	3.48593	6.65574	9.53025	10.1609	7.72943	6.11277	9.20789	8.81711	6.42334	13.4643	7.85126	4.65833	7.50152	10.8884	4.30487	8.80712	12.5183	4.14503	5.99668	9.3338	5.69455
208	control	European American	7.3791	6.87441	8.82831	9.67174	6.94964	11.3369	11.1706	7.25912	9.01892	4.49486	12.208	5.66794	10.0155	8.61533	9.15064	5.01048	3.46866	9.23334	7.5694	11.9004	10.3819	4.85134	11.315	7.05219	10.4976	12.5401	4.78617	7.08911	6.57978	10.6861	7.3535	5.86125	8.50636	10.0698	5.91882	13.0402	7.38042	4.04491	6.65955	11.9501	5.8953	8.89842	12.0622	4.47534	5.73176	9.25553	5.19595
209	case	African	14.5784	8.86586	10.5145	6.74373	7.45026	12.0712	10.715	5.51443	9.42258	6.69628	13.9428	7.36339	9.41725	7.40682	10.9087	6.87357	4.11611	9.63363	7.81274	13.0187	9.94371	6.35286	11.8419	7.31435	8.39658	12.5467	5.24952	5.61496	8.56888	10.3451	7.61655	7.72633	10.3479	9.94782	6.33796	9.77027	8.13939	6.22656	7.74169	11.6529	7.10764	11.6648	12.506	5.0606	5.71236	9.5417	6.2411
210	control	African	11.0069	6.3004	9.15098	10.0889	7.19222	12.409	11.4018	5.87383	8.6055	5.33189	11.4594	6.08926	10.663	8.851	9.03289	5.47014	3.8629	8.54982	7.50962	12.1487	9.86435	7.55276	12.1078	7.45673	10.0837	12.651	3.25722	7.24416	10.9051	10.9658	7.59791	5.71448	8.96774	9.15734	6.84525	10.2322	7.148	5.50562	6.71608	9.97804	5.80155	10.3389	12.0438	3.43856	5.39403	8.9264	4.24533
211	case	African American	14.9566	7.12324	8.67333	10.5887	7.00937	12.4509	11.2424	5.89094	8.94135	4.6951	11.6648	5.22388	10.4308	9.44916	8.10473	5.79092	4.01589	8.81888	8.02086	12.822	10.0919	10.4006	12.416	9.27452	10.0348	12.5982	2.99535	7.15812	10.1155	10.3209	7.77474	5.51039	8.46415	10.2925	7.76233	13.055	6.78383	5.00262	6.82303	10.7296	5.19858	10.3018	12.2263	3.38131	5.61414	9.06185	4.23672
212	control	European American	7.89033	6.78866	8.99643	10.4065	6.86985	11.7082	11.465	6.93453	9.13051	3.62295	12.3978	6.13559	10.4076	9.03527	8.17975	5.51955	3.74776	9.01453	7.8533	12.171	9.99383	5.65539	10.5777	6.61706	10.5632	12.4706	4.1633	6.73654	8.36572	9.1507	7.6941	6.62075	8.61852	9.70697	6.62039	13.0943	6.95133	5.07273	6.74092	11.6407	6.07243	7.92643	12.2273	4.66923	6.05898	9.18206	5.1215
213	control	European American	8.2344	6.64289	8.88752	8.6201	6.62893	9.18874	11.3979	8.27617	8.97458	4.05946	12.977	5.52961	10.3865	9.1212	8.60628	5.73567	3.54618	8.67151	8.16245	11.8529	10.5622	6.29426	10.6728	5.59659	10.5278	12.4391	3.90245	6.19752	8.58029	9.29567	7.75198	6.34666	8.40002	10.115	6.79179	13.0782	7.09903	5.04331	6.86625	11.6215	5.57553	7.747	12.1843	3.72093	5.69845	9.1112	4.60793
214	case	African American	8.13599	6.65057	8.8498	9.68403	6.67441	11.2942	11.4739	6.74081	9.16918	4.23654	12.0699	5.7773	11.9282	8.84431	7.65715	4.73599	3.50963	9.26004	8.00601	11.9787	9.88568	5.54866	12.1798	6.40167	9.98881	12.4971	3.4506	6.2413	9.7589	8.36968	7.84823	5.65478	8.74536	9.22436	6.65559	12.3205	7.39208	5.10291	7.32749	12.5349	5.67803	7.06396	12.597	2.71721	5.75509	9.01374	3.86398
215	control	European American	10.9771	7.11682	8.53792	10.5913	6.92883	12.1598	11.5315	7.29418	8.93201	4.44527	12.8218	6.13811	11.245	8.7661	8.62842	5.16344	3.76138	8.82965	8.03191	12.484	10.3177	6.99602	11.1049	7.58881	10.5875	12.4727	4.67114	6.88083	9.56152	9.73743	7.52532	5.70166	8.67233	10.0318	6.85048	13.2586	7.20414	4.38908	6.47391	11.6274	5.83242	8.96888	11.885	3.8711	5.82931	9.09594	5.06925
216	case	African American	8.83296	7.24584	8.26878	9.25716	6.63906	10.5483	11.1267	7.34324	9.26783	5.35178	12.7319	4.78462	10.9408	9.26488	9.40827	4.55777	3.76912	8.98107	7.73028	12.0702	10.1443	6.21268	11.3819	6.08884	10.1411	12.3137	4.42124	6.53252	9.02915	9.5005	7.68837	5.91685	8.88989	9.74414	6.11001	12.8848	6.8906	4.84825	6.83446	11.0305	5.70003	7.54207	12.1035	4.31916	5.51193	9.16504	5.6053
217	case	African American	8.89376	7.32153	8.69142	8.64947	6.29114	10.6524	11.2184	6.69971	8.97613	4.59242	11.0584	4.95455	10.4114	8.4166	8.26243	4.54888	2.74512	8.68774	7.85117	11.902	9.08157	6.38008	12.8221	6.18171	8.95671	12.6618	4.5761	5.73735	8.7332	8.53203	7.56306	5.66277	9.9092	9.35971	6.34393	12.1727	6.58435	5.23004	6.87902	11.3335	5.93621	7.85471	12.5002	3.7715	5.2671	8.92671	5.05791
219	case	African	14.1053	5.22979	11.0284	7.31902	7.24102	12.7157	10.9811	5.77381	8.01401	4.54921	12.3073	3.69894	9.49882	7.61564	6.62228	4.66136	2.26975	8.3251	7.66193	12.4158	7.93883	4.97381	11.6525	7.95776	8.09492	12.2632	2.93525	5.09636	7.27936	9.35351	6.85945	5.78561	8.82057	9.48226	5.68295	8.85948	5.86071	3.97625	5.48267	9.05877	5.59511	8.89791	11.1999	3.19179	5.06014	8.08793	3.39631
220	control	African	13.3347	6.35713	8.82105	9.52136	7.02644	12.1774	11.186	6.52578	8.72794	4.05473	10.9735	5.59863	10.2749	8.46441	8.4973	5.37145	3.72923	8.7245	7.88748	12.301	9.9419	7.27476	11.8655	7.29163	9.70834	12.528	4.47029	6.8225	9.29141	10.0398	7.5684	5.42732	8.50474	9.23608	6.63448	12.7667	6.91977	5.09825	6.45877	10.1398	6.33141	9.51764	11.8199	3.45056	5.48703	8.89728	4.46938
221	case	European American	12.0202	7.41146	8.65067	10.1978	6.83476	12.2687	11.4629	5.86127	9.71469	6.02961	13.5852	5.06961	10.271	8.93903	8.39729	5.60307	3.46363	10.1038	7.76284	12.856	10.0703	4.84954	11.5605	8.14851	10.1375	12.6669	3.63097	6.49369	9.2194	11.0239	7.92321	6.63408	8.98704	10.3171	5.72055	13.6693	7.16672	4.98912	7.69082	11.541	5.90675	10.6716	12.4016	4.98828	6.10439	9.41569	5.9605
222	case	African	7.42854	5.81337	10.0407	5.57945	7.22939	11.8256	10.8556	5.68025	8.26568	3.6815	10.6662	5.16674	9.75894	6.915	7.33679	5.72795	3.21745	8.59597	7.61968	11.2932	8.74127	5.13661	11.7615	6.88795	8.15486	12.4383	3.79249	5.98359	9.49492	8.42627	6.91627	6.14757	8.5298	9.08538	5.63048	8.94433	6.76068	4.79844	6.01507	9.83402	5.59798	7.26986	12.129	3.27538	5.7991	8.76409	3.95571
223	control	European American	10.2724	6.51942	8.26876	9.86975	6.19189	11.7579	11.4402	6.16446	8.76837	4.34269	12.4273	4.43422	10.6853	8.88612	8.45118	5.30135	3.5005	8.94932	7.64674	12.0983	8.98649	4.26601	11.4609	7.36142	9.59445	12.5823	3.10727	5.93218	8.2209	9.41772	7.64746	5.45125	9.07591	9.77852	5.78472	11.2947	6.47484	4.4037	6.74397	11.6483	5.64361	8.67597	12.3989	4.51237	5.59369	9.00497	4.66285
224	case	European American	15.1204	6.44778	8.6671	10.0114	6.61327	12.2547	11.0268	5.91108	8.23951	4.81412	12.5349	4.5804	9.71352	8.17153	7.99615	5.21061	2.96124	8.93196	7.85463	12.5659	9.65909	5.14807	11.4141	8.44551	9.58959	12.6623	3.06973	6.02458	8.80981	9.69908	7.47663	5.03282	8.24382	9.81858	5.94994	12.9874	6.3058	4.28152	5.97425	10.7125	5.45115	10.4942	11.7586	3.28426	5.36192	8.80007	4.10837
225	case	African American	10.9263	6.56863	8.52759	9.30101	6.59818	11.362	11.0697	6.97284	8.83995	4.22288	13.794	4.99449	11.4436	8.83831	8.25873	5.51827	3.1838	9.55323	7.75634	11.9891	9.25703	6.36496	12.4125	6.23239	9.91966	12.5984	3.80401	6.15413	9.71108	8.64337	7.57167	5.46577	8.82771	9.32518	6.00848	12.6654	7.09034	4.85672	7.62706	11.6912	5.37641	6.88377	12.5004	3.8559	5.68932	8.98485	5.32399
226	case	African American	7.86274	6.33672	8.92087	9.71538	6.7093	11.2801	10.9893	6.40593	8.73207	3.6765	11.6081	5.65761	10.7024	9.12892	7.85024	5.43376	3.80039	8.85422	7.94103	11.9104	9.65835	6.37012	11.6867	6.28212	9.94739	12.5737	3.74113	7.05526	10.4194	8.5222	7.05203	5.60889	8.6308	9.02914	6.38445	12.8125	7.31108	4.35776	6.09645	10.4217	5.40298	6.85957	11.8438	3.81366	5.64997	8.87222	4.96728
227	control	European American	11.5349	6.24318	8.35862	9.34005	6.53738	11.4477	10.917	5.2977	8.82129	3.94488	11.9916	5.24026	9.74958	8.52113	7.8395	5.16958	3.27764	9.04802	7.38036	11.9898	9.43411	5.65956	10.0603	7.07783	9.65296	12.5374	3.75488	6.77141	8.27268	9.94623	7.38146	5.43161	8.84006	9.48414	6.4535	12.4404	6.26652	4.40111	7.14673	10.8567	5.46422	9.56261	12.0626	3.91567	5.76526	8.43676	4.68833
229	control	European American	6.68237	6.3866	8.46327	9.7335	6.28332	11.3425	11.2139	6.93166	9.00765	3.55455	12.573	5.52008	10.7419	8.68998	8.38623	5.20582	3.14995	8.64644	7.79781	11.7731	10.0659	5.38476	10.8539	6.45905	10.6088	12.5567	3.62946	6.0349	8.72285	8.72296	7.30996	5.55585	8.40852	9.67606	6.22945	12.9356	6.51208	4.97965	6.79085	11.3337	5.32333	6.73322	12.0092	3.21746	5.80993	9.00092	4.53067
230	control	European American	13.5715	7.46541	8.78236	10.1048	7.10001	12.3705	11.4385	5.52267	9.54729	4.6842	12.2872	5.91875	10.0237	8.64331	9.43807	5.39884	3.90777	10.049	7.94112	13.0124	10.7751	5.38108	10.5986	8.18628	10.0024	12.6583	4.3609	6.87538	9.06113	9.52892	7.93928	6.19064	8.98699	9.88982	5.93102	13.2555	7.00707	4.47252	7.59093	11.9671	6.31785	9.31187	12.1563	5.24341	5.69516	9.56869	5.81904
232	control	African	13.5744	5.97474	8.51739	10.0299	7.03631	12.3257	11.4925	5.84046	8.22932	4.56706	11.0868	5.6871	9.58209	8.58781	7.84149	4.81542	3.69011	8.69287	7.50618	12.2487	10.1237	7.78197	11.5953	7.04289	10.0584	12.6496	3.09686	6.93346	7.92801	12.1638	7.49812	5.1331	8.27872	9.33413	6.77856	12.2089	6.30389	4.77651	6.18793	10.6527	5.21619	11.2317	11.8392	2.72178	5.42078	8.55091	3.48956
234	control	African	11.9072	5.72956	8.29396	9.75011	6.61443	12.0325	11.1521	5.60402	8.06208	4.41513	11.3219	5.29869	11.2175	8.08278	7.79745	4.60142	3.45816	8.71571	7.74693	11.9078	9.11134	8.43874	12.4428	7.16328	9.32181	12.4929	3.206	5.81518	8.97291	9.59334	7.12946	5.12897	8.70245	9.01063	6.99475	12.1778	6.7551	5.00194	6.14595	10.5986	5.71353	9.40384	12.0442	2.9714	5.11374	8.49027	3.95004
235	control	African American	14.9497	5.93815	8.34959	9.68074	6.1989	12.1038	11.4187	5.64588	8.37916	3.895	12.3606	4.29163	9.99518	8.34867	6.81352	4.68904	3.4434	8.35904	7.73129	12.2739	9.52335	5.63034	10.7589	8.45667	9.96589	12.7267	3.11382	6.24245	8.42796	8.68567	7.49886	5.08961	7.98195	9.93768	5.99005	12.729	6.62596	4.63846	6.08089	10.3021	4.8355	9.23433	11.3283	3.146	5.39941	8.85425	4.03312
236	case	African American	7.93365	6.97728	8.85577	8.46457	7.01934	10.247	10.8474	6.50113	9.14695	3.84811	11.2797	5.61897	10.2765	9.154	7.87451	6.25421	3.80473	9.30186	7.8395	12.0689	9.62308	6.48961	11.9765	5.76143	9.31146	12.4693	4.86151	6.74233	8.86321	8.69489	7.61781	5.99908	9.37768	9.81403	6.81287	12.6426	7.40556	4.88109	7.18673	10.776	6.016	7.22881	12.1318	4.008	5.78344	9.49325	5.27615
237	control	European American	7.7247	6.55078	8.43848	9.50078	6.76589	11.5109	11.2382	6.8851	8.69804	4.00372	12.2883	6.07005	9.62699	8.73365	8.24507	5.02275	3.28839	8.77051	7.81133	11.4381	10.2424	5.66698	10.8318	7.18031	10.2135	12.6723	3.57607	7.24037	9.03842	8.19407	7.68934	5.29806	8.68876	9.26553	6.56708	12.3012	7.03801	4.76697	6.97364	11.2569	5.77597	6.8657	11.929	3.9573	5.75878	9.07781	4.67638
238	control	African American	7.7421	6.39538	9.06647	9.93995	7.22372	11.4023	11.4486	5.68712	8.95572	3.58036	10.8029	6.14744	10.4139	9.07451	7.33188	5.30408	3.70641	8.7596	7.96922	12.3132	9.38416	5.77258	12.1652	6.67785	9.52198	12.6173	4.33508	6.88849	9.81681	9.69206	7.31994	5.74768	8.90673	9.08157	6.86802	13.4229	6.97596	4.50375	6.74706	10.6205	5.85884	7.93499	12.1619	3.52449	5.86475	9.58265	4.80531
239	case	African American	6.96153	5.65427	8.49283	8.13532	6.11509	8.97088	10.991	6.36197	8.30405	3.30368	10.7423	4.91673	8.9029	8.19414	7.12836	4.66381	2.83148	8.01398	7.45428	10.5323	8.50175	4.18269	11.8776	4.90932	9.24722	12.3683	3.39905	6.32443	8.0198	8.14793	6.90807	4.89804	8.27205	8.33862	5.45383	12.5546	6.76976	3.9915	5.79426	10.1857	5.09515	6.6564	11.6253	2.92172	5.39983	8.68507	3.99722
240	case	African American	7.81063	5.81794	8.73029	10.0742	6.63239	12.294	11.0425	5.64679	8.68197	3.53717	12.556	4.60105	10.398	8.51606	7.43692	5.17945	2.94781	8.72151	7.93211	12.0744	10.211	5.71735	9.85894	6.95176	9.41534	12.5278	2.93852	6.14896	9.44101	9.19092	7.43337	5.14967	8.58214	9.05712	6.00012	13.3119	7.15414	4.73462	6.95747	10.7578	4.97467	7.72361	11.918	3.53063	5.33749	8.99959	3.88906
241	control	African American	9.75918	6.02655	8.48382	9.9012	6.61764	12.0048	11.3931	6.85965	8.88408	2.86104	11.3509	4.6355	9.60499	8.83321	6.44935	5.26753	3.53207	8.87898	8.15395	11.9316	9.53568	6.12313	11.8849	6.85643	9.83642	12.7193	3.40552	6.4594	9.02549	8.9391	7.57618	5.21287	8.80534	9.15318	5.8351	13.1698	6.91238	4.44115	6.26774	10.5632	5.73016	7.93325	11.9508	3.75934	5.49211	8.98479	4.32814
242	control	European American	13.3071	6.26632	8.63245	7.44212	6.92641	12.3399	11.2306	5.85792	8.52837	3.79721	11.6884	5.67307	9.47492	8.61282	7.2516	5.28537	3.7851	8.38551	7.64346	12.1324	9.59033	6.90827	9.9675	7.88016	10.1854	12.5616	3.74115	6.88487	8.70192	10.0375	7.53453	5.57447	8.24511	9.56883	6.66188	13.1109	6.2647	4.27015	6.38993	10.8384	5.4005	8.13141	11.9333	3.24813	5.65877	9.00092	4.21603
243	control	European American	14.5747	6.79625	8.47282	9.89418	6.491	12.2794	11.3596	7.82951	8.75177	3.71738	12.6614	4.98406	9.29042	8.59166	7.4023	4.5151	3.87969	8.7109	7.77828	12.1009	9.63124	6.5429	9.74982	7.5047	9.83004	12.493	3.84207	6.55781	8.53791	9.25335	7.42368	5.26867	8.53352	9.7109	6.88361	12.816	6.73678	4.05908	6.38017	10.9977	5.37517	8.17277	11.6044	3.82096	5.39823	8.84461	5.02723
245	control	African	11.4078	7.23461	8.8114	9.67032	7.23303	12.1197	10.9717	6.21357	9.03326	5.58386	11.8287	6.81859	10.7735	9.0918	11.3634	5.2246	3.79081	9.35503	7.94661	12.2776	10.6091	8.36365	12.4503	7.33641	10.0479	12.5272	4.54345	7.34835	9.33844	11.6777	7.62289	6.10217	9.36025	9.50579	7.88124	13.0308	7.19379	5.16295	7.19119	11.5912	6.15104	14.1718	12.3063	3.93294	5.82231	8.98698	5.38941
246	case	European American	6.65945	6.18587	7.91937	9.27105	6.49504	10.5723	10.8207	6.24158	8.5049	3.90321	11.8475	4.98608	9.56341	8.49222	7.46522	4.43224	3.08755	8.31761	7.58959	11.1389	10.095	4.31742	10.4976	5.61127	9.58016	12.1215	3.28352	7.16142	8.51794	8.37489	7.06622	5.21604	8.00797	9.14723	5.62343	12.9138	6.75412	4.66454	6.3686	10.7487	5.24432	6.66648	11.6677	3.9304	5.15645	8.74188	4.68735
247	case	African	7.10569	6.64124	8.51248	7.60174	6.33419	12.06	11.2029	6.65998	9.23052	5.79552	10.5804	5.74605	10.7774	7.88719	9.68559	4.80302	2.89578	9.23826	7.53724	12.0794	9.55655	5.61889	12.6638	7.30111	9.51771	12.6115	3.80703	6.68663	8.76501	8.01791	7.30943	6.39073	9.46903	9.93112	5.92573	10.3131	7.22615	4.20924	6.77666	11.449	5.90735	6.75726	12.1504	3.75761	4.9155	9.20095	4.47668
248	case	African	13.9562	6.85463	8.7717	8.68187	7.27745	12.3993	11.3601	6.48111	9.28802	14.36	14.3902	6.54051	10.1989	8.27064	10.9853	5.29951	3.94882	9.17117	7.67433	13.1862	10.6722	7.74022	13.3714	9.23771	9.84165	12.7786	3.77131	5.9202	8.85504	14.746	7.68811	6.08393	9.90389	10.4037	6.41409	11.8885	7.08761	5.44479	7.24018	12.0693	6.44664	14.1195	12.379	4.05742	5.31975	9.01796	4.76434
249	case	European American	14.8795	6.55034	8.7778	9.72173	6.19785	12.38	11.4632	7.7374	8.80288	7.11114	12.4873	5.14478	10.4195	8.68075	8.64081	5.52343	3.12283	9.13779	8.22793	12.3748	9.91302	5.00015	10.8752	7.75202	10.263	12.7731	3.85692	6.31535	8.1991	10.8147	7.65989	6.2642	9.29758	9.44109	6.00618	13.5324	7.21674	4.87969	7.17389	11.2162	5.13284	8.23319	12.0363	3.7326	5.65452	9.15674	4.50481
250	control	African	11.0281	6.4735	8.66704	10.3184	7.17721	12.4575	11.3271	6.22	8.72633	4.48146	10.9066	5.87706	11.1082	8.93532	8.22759	3.60158	3.66892	8.94035	7.5554	12.1152	9.86555	7.71872	11.8655	7.41488	9.68478	12.5806	3.22647	6.57613	9.91011	11.1451	7.49108	5.52291	9.12374	9.23812	6.80385	11.4983	6.8448	4.69993	6.40808	11.1701	6.03477	14.0195	12.2624	3.44855	5.58289	8.68187	3.99878
251	case	African American	7.8449	6.41141	8.16643	8.33598	5.96935	10.1719	10.7616	6.8453	8.95498	4.25998	11.5132	5.00349	9.49886	8.47015	8.12336	4.7071	2.67398	8.48748	7.77639	11.5752	8.97704	5.37871	12.3951	4.35216	10.0012	12.5607	3.52708	6.61737	8.88091	9.98319	7.52014	5.31717	8.61784	9.01181	5.89596	12.4916	6.47685	4.64838	6.88236	10.8962	5.42197	8.67367	12.3042	3.55601	5.78422	8.64874	4.73986
252	case	European American	10.1837	6.2386	8.29602	10.4267	6.34905	12.1348	11.059	6.41989	8.83148	3.50861	12.8111	5.55359	11.1453	8.91226	9.02684	4.75851	3.01503	8.91516	7.75177	11.7663	9.74134	6.25222	11.5081	7.92599	9.40081	12.4826	3.87137	6.65764	9.28008	9.06574	7.25028	5.20828	8.19363	9.76695	6.18896	13.0423	6.54282	4.04796	6.65872	11.2221	4.98188	8.8283	12.042	3.38847	5.42426	8.69389	4.29131
253	case	African	11.3671	6.29049	10.1991	7.66947	6.81355	12.058	10.8573	5.64265	8.53921	5.32188	9.81148	5.84284	9.65154	5.9575	10.1388	4.72438	3.72523	9.3316	7.61536	11.9248	9.40242	9.45323	11.9075	6.83555	7.98944	12.5541	3.78789	5.01026	7.24256	7.73361	7.55351	6.53868	9.88688	10.1229	7.42514	9.45756	6.17366	4.56134	6.92135	12.1649	6.06127	8.01694	12.4781	3.88298	6.15759	8.50701	3.98339
254	case	African American	7.6336	6.92367	8.94863	9.34707	6.35901	11.3688	11.1648	6.18752	8.98807	4.19009	11.3832	5.46878	10.0012	8.68278	7.93927	7.22678	4.81945	8.8037	7.64219	11.6851	9.39986	6.02501	11.3291	6.05004	9.90751	12.4766	3.664	6.32623	9.09873	8.77857	7.64405	5.78731	8.825	8.95751	6.47881	12.8821	7.33849	4.88403	6.88833	10.6601	5.90778	7.71332	11.9533	4.01297	5.47714	9.06357	4.72847
255	case	African American	7.98462	6.49886	8.34712	10.353	6.44377	11.878	10.416	6.95341	8.8536	4.46359	11.5828	5.08822	11.5201	8.43864	6.86449	4.78004	3.70205	8.15166	7.63923	11.8973	9.70438	6.68696	12.2414	6.07985	9.62638	12.5335	3.27265	6.32998	9.26867	8.86223	7.40672	5.72377	8.81295	9.4603	5.97618	12.5988	7.13813	5.45673	6.71692	11.0302	5.45592	7.99351	12.2216	3.2288	5.49333	8.92294	4.61338
256	case	African	15.0352	6.59736	8.94459	9.71068	7.15652	12.5973	11.397	7.06365	8.92126	13.1512	12.2885	5.5355	10.4414	8.50035	9.5524	4.88206	5.3318	9.00434	7.85807	12.7112	9.68941	6.53532	12.8846	8.43007	9.69094	12.732	3.5183	6.38126	9.41362	13.6143	7.73537	5.38725	9.12561	9.86138	6.2943	12.2622	6.99621	5.01955	6.5101	11.0293	6.00684	14.6021	12.2308	3.47507	5.34602	8.59054	4.55838
257	case	African American	8.43788	6.12867	8.60051	10.3807	6.00804	11.956	11.4749	6.56943	9.06119	5.84129	12.2651	5.5077	11.6413	8.79521	7.7172	4.72025	3.65642	9.73979	7.62232	11.8255	9.69697	6.62655	12.4928	7.43685	9.63314	12.6146	3.32825	7.07698	8.9598	8.96816	7.67071	5.38361	8.36805	9.39542	6.11787	12.6801	6.67336	4.86704	6.70173	11.0923	5.27446	8.73819	12.4133	3.58625	5.44169	8.75817	4.60547
259	case	African	14.7298	7.53942	9.27564	8.97595	8.20312	11.739	10.973	5.94393	9.21414	10.9371	11.3031	6.95344	9.96774	9.01518	11.3162	5.54207	3.91558	9.72099	7.43661	12.1175	10.2733	7.30057	12.4117	7.88945	9.22404	12.7314	3.7076	6.78156	9.06413	12.7814	7.67102	5.42188	9.15255	10.0803	7.34058	12.9398	6.747	5.23095	7.4085	11.2772	6.16181	13.8261	12.4305	3.21098	5.59662	9.17285	4.93485
260	control	African	11.237	6.89991	8.61442	9.81898	7.31986	11.9162	10.9673	6.50946	8.9019	4.30403	10.8696	7.01951	9.44503	8.57612	10.8227	5.13276	4.53759	9.67033	7.66238	11.6629	10.7653	9.755	12.2247	6.48082	9.93678	12.5519	4.59912	7.57961	9.16762	11.9309	7.48665	6.01526	9.09803	9.05038	8.70852	13.4403	7.46006	4.69303	6.37202	11.0594	6.39032	13.6234	11.5417	3.96371	5.63138	9.18889	4.24932
261	case	European American	9.00749	6.3591	8.67935	9.862	6.78439	11.6749	10.8962	5.23786	9.02865	4.08785	12.5604	5.64147	9.63458	8.53829	9.72785	6.12233	2.17859	8.85931	6.89135	11.5475	8.71992	6.83178	10.3935	7.6216	10.2702	12.4438	3.38212	7.16662	9.01586	8.23213	7.4273	5.35031	8.0981	10.6298	6.50437	12.4571	6.61631	3.40939	6.48905	11.2325	5.07484	7.68642	11.8938	3.85658	6.90882	8.93985	4.50777
262	case	African	10.1462	6.79663	8.59749	8.63584	6.62716	11.5614	11.2237	6.56382	9.31903	4.57099	11.2944	5.47865	11.2039	8.367	9.55481	5.66215	4.20509	9.28555	7.56941	12.2284	10.2576	8.26223	12.2003	7.11196	9.76167	12.5037	3.97375	6.51812	10.299	9.44343	7.41359	6.00651	9.58368	9.63491	6.4241	12.6862	7.19857	5.47474	7.76503	10.877	5.77904	10.6547	12.535	4.16758	5.60645	9.17082	4.71678
263	control	African American	12.8757	5.86722	8.06209	9.42392	6.12806	12.182	11.3768	5.26844	8.07778	4.47825	10.8375	3.75646	10.3929	8.37009	7.72602	4.54031	3.09812	8.89479	7.79235	12.1057	8.523	5.29289	11.8044	7.14877	9.51802	12.6805	5.00607	6.71121	8.95532	9.85812	7.3622	5.01259	8.40571	9.54653	5.73168	11.9004	6.46412	3.983	6.20566	10.1799	5.3568	8.42791	12.0035	3.04964	5.32715	8.51965	4.24372
264	control	African	6.95902	6.92304	8.15704	9.11272	7.49091	11.6373	10.4138	6.36213	8.71367	3.88421	11.0734	6.31868	10.1942	8.65332	8.5448	5.35103	3.22965	9.28237	7.54808	11.7235	10.2517	6.91607	11.8591	5.73831	10.0709	12.4669	3.80153	6.76863	8.72384	9.36983	7.23278	5.44263	9.10212	8.68229	6.69322	12.6286	6.80445	4.72686	6.45588	10.7456	5.8136	7.29826	12.071	2.70297	5.51573	8.8494	4.09008
265	control	African American	7.46173	6.35614	8.27112	9.62237	6.51554	11.4961	11.4104	6.42806	8.98854	4.92325	11.9865	5.11112	10.0114	9.0061	7.88318	5.88111	4.66191	9.1023	7.74651	11.7942	9.94436	4.55575	10.9993	6.09718	8.85621	12.7427	3.88718	6.83317	8.70667	8.78487	7.58088	5.77548	9.28292	9.45821	6.36576	12.2886	6.836	3.92114	6.95411	11.2715	5.78131	7.73351	12.5819	3.76884	5.73256	9.07645	4.97865
266	case	European American	9.05522	7.16563	8.50289	9.78083	6.63239	11.52	11.1345	6.69657	9.31328	3.98503	12.8577	5.62414	10.6727	8.83406	8.38855	5.1455	2.93719	8.92414	7.35259	11.6006	9.88121	6.69884	11.0903	7.35542	9.69561	12.5669	4.35021	6.85244	9.23424	8.54319	7.17327	5.84401	8.81731	9.17529	6.83227	12.831	6.72779	4.84818	6.74321	11.36	5.56219	7.02419	12.2427	4.18568	5.60742	9.28119	5.55531
267	control	European American	7.29445	6.30932	8.4922	10.154	6.98142	12.3922	11.6964	7.09859	8.53845	3.75412	11.8288	5.82618	10.7315	9.12708	7.16896	5.30392	3.02997	8.24355	7.607	12.1059	10.2159	5.53824	11.1753	7.29149	10.0454	12.5194	4.19256	6.91978	8.70726	9.26222	7.34475	5.74589	8.43251	9.46687	6.26896	11.9908	6.45624	3.93983	6.33673	11.0533	5.6194	7.18737	12.5154	3.78946	5.96821	9.00815	4.52935
268	case	European American	12.9829	5.95203	8.44447	9.49907	6.72906	11.7248	11.0958	5.58496	8.81914	3.45731	11.6979	6.44564	10.3816	8.73616	7.26168	5.09262	2.9569	8.94866	7.52521	11.7681	9.5709	6.42281	10.6715	7.89317	9.99334	12.5961	3.05489	6.61024	8.98702	9.28881	7.48818	5.49106	8.06455	9.52387	6.41081	12.3559	6.73126	4.5007	6.74628	11.074	5.27074	9.48894	11.95	3.70843	5.62715	8.81148	4.08348
269	control	European American	7.3846	6.12702	8.75098	9.56736	6.6583	11.5301	11.2075	7.05176	8.88041	3.62785	12.3984	5.27259	10.4401	8.73387	7.69775	4.65728	3.41007	8.60553	7.7296	11.8519	10.173	5.52904	10.8318	6.69046	9.9815	12.4879	3.86294	6.73257	8.03955	8.31216	7.34362	5.29332	7.87237	9.56867	6.23783	13.1037	6.69265	3.87328	6.43243	10.5995	5.12631	7.41611	11.863	3.54743	5.54893	8.78526	4.57049
271	control	African	14.0351	6.07714	8.38787	9.54865	7.00997	12.6612	11.5711	6.77393	8.52137	6.29879	11.8248	5.10833	9.80237	8.44909	7.3911	5.23527	3.48102	8.97568	7.87647	12.7056	9.85992	8.85964	12.2404	7.18843	9.54993	12.6467	3.79034	6.27223	9.42573	11.1407	7.69529	5.60442	8.3799	8.67219	6.50871	11.8226	6.22763	4.43672	5.9681	10.2996	5.53612	11.0344	11.5952	2.69912	5.18213	8.74905	3.92866
272	control	African	11.9909	6.73814	8.27202	9.33809	7.33297	12.1491	11.1978	5.87873	8.75443	5.14238	11.5554	6.16904	10.3081	8.53399	8.52323	5.18883	3.71945	8.66437	7.52045	11.7619	8.98281	6.36149	12.3927	6.90634	9.56225	12.3838	4.03375	6.74758	8.87384	9.18699	7.31256	5.48611	8.95781	8.88648	6.19752	12.7048	7.25919	4.29249	6.84244	11.0303	5.6638	9.34059	11.8765	3.12703	5.55176	8.93081	4.5645
273	case	African American	7.72092	5.80341	8.97224	8.51607	7.1827	10.3172	11.5034	7.41084	8.87873	4.55516	11.4431	5.14338	11.0408	8.47286	8.41004	4.94021	4.24584	8.73927	8.19892	11.9021	10.248	5.43328	12.2956	5.20949	9.84236	12.7325	3.16056	7.47605	8.83824	9.34125	7.64268	5.42871	8.72677	9.23399	6.71378	13.6532	7.26176	5.09153	6.46781	11.2304	5.73412	7.73574	12.3266	3.8495	5.7551	9.00943	4.16848
274	case	African American	8.32279	9.63519	8.96277	8.98347	8.05372	10.2114	10.6429	6.1352	11.9226	4.4914	12.5021	6.4773	10.615	9.41607	12.5842	8.67628	3.77846	9.77009	7.88078	14.5596	10.6773	7.42938	12.0451	5.14192	9.59839	12.1502	5.74598	6.4986	9.15035	9.47457	7.9645	8.81448	10.5719	9.67267	7.34588	13.2023	9.83536	6.00629	9.26196	12.5036	7.81213	8.26352	12.4154	6.70777	6.80367	9.84157	6.84162
275	case	European American	15.0443	6.71747	8.29732	9.45856	6.51659	11.5843	11.0678	6.36144	9.5721	4.71966	12.9288	5.48681	10.6512	8.48432	8.44409	5.45519	3.85158	9.20232	7.43944	12.6282	9.47008	5.46057	11.4173	8.52764	9.71217	12.577	3.59797	6.07236	8.4613	10.2232	7.83619	5.86984	9.25362	9.79134	6.29524	12.8031	7.5196	5.22213	7.69035	11.5673	5.28174	9.96018	12.3755	4.10129	6.09945	9.21399	5.16524
276	case	African	5.82626	6.27152	8.42028	5.64973	6.55763	8.76762	7.25408	3.8458	8.59421	3.46565	11.0915	5.93005	10.0422	7.90579	9.09817	4.01524	3.14144	8.62463	7.03744	11.515	9.17413	7.15815	9.72699	4.15925	8.95307	10.1911	3.8416	5.98309	7.62373	6.75963	6.96205	4.81966	8.67678	8.37258	5.64221	12.1084	6.67271	3.51359	5.68565	10.4422	5.22398	5.61322	11.746	2.62975	5.691	8.39684	3.88901
278	control	African	7.76021	6.88133	8.50913	9.04712	6.45859	11.8369	10.8079	5.84975	8.7477	3.56299	11.0766	5.42955	9.76293	8.92003	9.82139	6.76824	3.47707	8.84437	7.32797	11.6303	9.86036	6.91473	12.1948	5.92658	9.36493	12.4228	3.5851	6.88278	9.6095	9.15683	7.33365	5.70975	9.04064	8.71159	6.43374	12.5231	6.81088	4.67155	6.34809	10.5353	5.33882	8.14246	11.941	3.51999	5.56539	8.60896	4.30631
279	case	European American	12.5216	7.16863	8.48581	10.0212	7.13183	12.2432	11.3233	5.98755	9.38239	4.58482	11.9873	6.13208	10.244	9.43752	8.40131	5.71389	3.63656	9.17329	7.33954	12.5314	9.80604	5.88122	11.3282	8.02525	9.81508	12.5852	3.94625	6.48983	9.37816	9.15871	7.53983	5.77645	9.0979	9.79925	6.70714	12.0929	7.29422	4.12948	7.02291	11.55	6.02515	9.64535	12.0895	4.25418	5.56769	9.31767	5.69338
280	case	African American	8.18056	6.51154	9.04996	8.44771	6.54494	10.2177	10.7182	5.77719	8.79201	3.31115	11.4308	5.44571	9.48668	8.88049	7.91616	6.87464	3.398	8.67109	7.66219	12.1561	9.74384	5.91561	10.8774	5.81139	9.81663	12.5892	3.87593	6.35746	7.31279	9.03524	7.41835	5.4394	8.47738	8.8833	6.31064	13.1905	7.35381	5.09037	6.8397	11.0582	5.52076	6.97784	12.1791	3.32949	5.88636	9.12292	4.72064
281	case	European American	7.99969	6.49793	9.07341	9.25547	6.79337	10.3178	11.3417	7.81323	9.2324	4.76126	12.866	5.16743	11.3648	9.0771	8.45084	5.07135	3.94609	9.26106	7.99194	11.7818	10.7925	6.13479	11.3058	7.39679	10.4647	12.6194	3.49499	7.21991	9.28004	8.91978	7.81227	5.92142	8.58115	9.932	5.9932	13.4776	8.27906	5.33278	7.17343	12.1553	5.28414	7.04154	12.1899	4.73631	5.70866	9.35146	5.48293
282	case	African American	7.06618	5.87338	8.43105	9.1743	6.4594	11.0629	11.0368	6.26543	8.60571	4.1188	11.0838	5.1895	10.5863	8.85024	7.4919	5.06803	2.70177	8.3773	7.95533	11.3466	9.27297	5.87238	11.7647	5.78952	9.66499	12.4293	3.22654	6.29437	9.39942	8.49294	7.16496	5.24583	8.38574	9.06987	5.9102	11.7086	6.67815	4.74006	6.36717	11.1607	5.47658	7.17678	11.7818	3.67498	5.29473	8.66703	4.08597
283	case	African American	10.4114	7.60849	8.47853	10.3582	6.96574	12.3344	11.3976	6.55378	10.2257	6.12603	11.9169	5.95474	10.7581	9.03253	8.69093	5.67132	3.49175	9.42318	7.85825	13.1339	9.84869	6.18417	13.2154	7.6438	9.93294	12.4621	3.42178	5.61705	9.58984	9.23817	7.81554	6.13148	9.39827	9.88365	6.60126	12.2628	7.46442	5.33211	7.3908	11.8181	6.26331	9.29869	12.4913	3.01683	5.83818	9.46302	6.18992
284	case	African American	7.30426	6.55586	8.80648	9.64401	7.10459	11.6776	11.4745	6.93177	9.13517	6.65531	11.3447	5.45981	12.0265	8.84004	7.22668	5.35251	4.29735	8.55475	7.88374	12.2253	10.2086	5.0211	12.7415	6.90587	10.1807	12.3327	3.89813	6.4223	9.38647	8.75192	7.70368	5.59947	8.96031	9.88976	6.22682	12.6692	7.64419	5.50931	7.30546	11.543	6.18798	6.98805	12.2102	3.55126	5.70679	9.27503	5.09735
285	case	African	14.5621	7.26752	9.71107	6.4929	7.68544	12.6888	10.8951	6.31684	9.1418	14.4417	14.4373	6.27103	10.9524	8.33574	9.74897	4.83016	5.15466	9.63046	7.87798	13.321	9.76105	9.59862	13.3427	9.51514	10.1492	12.6587	4.56645	7.08885	10.8031	13.7666	7.31996	7.51591	9.52806	10.6177	7.03232	10.8166	6.74922	5.16697	7.52569	11.2907	6.19868	14.056	12.5152	3.94263	5.56437	9.0026	4.58804
286	case	European American	10.3704	7.37964	8.7106	9.50938	6.50029	11.6922	10.8908	6.85683	9.47644	5.12372	12.6902	6.05082	10.761	8.89028	11.1653	5.37051	4.1809	9.45672	7.93221	12.235	9.71342	6.71384	11.43	7.30597	9.66244	12.5877	7.55811	7.47721	9.34544	10.7229	7.90784	7.10767	8.8704	9.74509	7.33169	13.4406	8.4699	5.07622	7.28248	12.3955	5.50548	9.55803	12.3721	5.46298	6.0351	9.23604	5.49421
287	case	European American	8.33675	5.81514	9.09723	9.46693	6.51036	11.0396	10.8664	6.62172	8.82911	2.88406	12.155	4.78667	10.3818	8.46649	8.78597	5.29166	3.09924	8.27916	7.70579	11.6254	8.95496	5.14044	11.4596	6.54139	9.7013	12.541	7.26956	6.79376	8.77389	9.44501	7.23678	5.58053	8.06796	9.44157	5.93828	12.2546	7.33965	4.59552	6.68343	11.0628	5.18153	8.22133	11.9789	3.52049	5.67525	8.88714	4.31962
288	case	European American	7.31395	6.72311	8.4986	8.97085	6.5885	10.3788	10.9264	6.45543	8.81797	3.94779	11.5067	5.48301	9.6737	8.49533	8.14256	4.56313	3.54893	8.83942	7.68764	11.729	10.1886	5.41036	10.5401	6.17876	9.95481	12.4233	4.26902	6.9151	9.09754	7.56511	7.41346	5.68054	8.85426	9.26339	6.19196	13.0276	7.04499	4.04402	6.71814	11.7264	5.83505	6.32752	12.1791	3.42095	5.06972	8.98122	4.81424
290	case	African	14.3264	6.64896	10.938	8.15772	8.01799	13.1817	11.1048	5.51202	9.194	14.7352	14.1972	6.52269	9.43269	8.06361	9.6365	4.91056	4.20055	9.28536	7.62386	12.5069	9.74229	10.4629	13.287	9.37016	9.30094	12.6925	3.82351	4.96713	9.29095	13.8808	7.97204	7.67074	9.66486	9.99823	7.78017	9.24135	7.32785	6.11441	6.80099	10.3977	6.24363	14.2709	12.3091	3.22152	6.03271	9.00073	4.76279
291	case	African American	8.87797	5.96711	8.03394	6.72089	6.5522	9.27152	9.42454	4.66409	8.96369	3.811	13.0148	3.46793	9.78463	7.64556	7.06786	3.512	2.69794	8.29833	7.39992	11.2713	9.3549	3.73835	10.9094	3.58139	9.06618	10.9531	2.39509	5.74976	8.71999	7.82358	7.09872	5.25477	8.33018	7.79462	5.04823	13.4414	7.32719	3.99672	6.64429	10.5939	4.52582	6.31924	12.085	2.01733	5.02529	8.78132	4.44527
292	case	European American	13.9847	6.39456	8.66185	10.065	7.19552	12.6683	11.4594	6.05749	8.81766	4.41903	12.2223	5.39577	10.0168	8.61045	6.86955	4.54602	3.28888	8.92385	7.86413	13.209	9.84268	6.5231	11.2567	8.23613	10.5739	12.6957	3.12642	7.2046	8.15172	9.94684	7.61446	5.70372	8.61519	9.46591	6.70382	12.8683	6.82819	5.07024	6.87705	10.9654	5.42818	9.25017	11.8752	3.484	5.72581	9.01822	4.44158
293	case	African American	8.61967	6.32969	8.55421	9.77896	6.80851	10.8049	11.0625	6.81764	9.07151	4.49408	11.5537	5.77048	9.81899	8.7734	9.16867	5.9668	4.52815	9.35032	7.48413	11.9709	9.34333	5.70802	12.6147	5.21642	9.91927	11.3682	4.4617	6.88728	9.31018	8.54051	7.54982	5.56029	9.19555	9.21406	6.32455	12.989	7.32469	4.77908	7.24794	11.0853	5.61768	7.67594	12.2778	3.6	5.62736	9.28052	4.9977
294	control	African American	8.94224	5.51376	8.78357	10.2926	6.54076	11.9457	11.5015	7.00321	8.75483	3.36183	12.3404	4.44731	10.9285	8.60009	7.95498	4.9361	4.04828	8.4437	7.74475	11.8452	8.99458	5.36423	11.5316	7.54836	9.98089	12.6293	3.17747	6.31891	8.93783	9.58096	7.5032	5.35166	8.22392	9.42542	6.07408	12.6433	7.02456	5.07167	7.08598	11.5573	5.53401	7.81257	12.1417	3.00182	5.56262	8.83928	3.8906
295	case	African	14.2813	7.51249	9.77097	7.65124	7.55517	12.6588	11.3787	5.68348	9.59292	4.55254	11.6753	6.28814	10.5988	8.50264	9.28113	5.45693	4.69899	9.70316	7.59672	13.3705	10.2986	8.61568	12.2929	9.07498	9.38891	12.5727	4.41848	6.94459	9.26155	10.3635	7.46401	5.72757	9.1883	10.5316	7.05088	11.2741	7.27043	5.30353	7.47871	11.0589	6.24423	9.87153	12.3858	4.58039	6.5047	9.4162	5.19086
297	case	African American	8.45161	6.25651	8.63316	9.5957	6.43835	11.4046	10.7977	5.53312	8.40297	3.8476	10.789	4.58451	8.6019	8.74629	7.2465	5.34789	3.33108	8.67928	7.73124	11.5216	10.4677	6.66375	11.6426	6.24533	9.20389	12.0554	3.17806	5.89372	8.32921	8.63938	7.27365	5.26104	8.21846	8.96466	5.944	13.6042	6.49542	4.42159	6.67869	10.1808	4.88463	7.43172	11.9365	3.28986	5.39635	8.93113	4.86829
298	control	African	7.91825	5.87836	8.58523	9.44874	6.51107	12.0873	11.3484	5.46605	8.46946	3.583	11.034	5.60532	10.9642	8.27578	7.73851	4.73879	3.64492	8.41304	7.7349	11.9814	8.61356	6.85555	12.4118	6.20452	9.79066	12.632	3.11455	6.56682	9.87227	9.13688	7.49822	5.70135	8.85563	9.05817	6.11092	12.5051	6.4728	4.88577	6.63755	10.2305	5.29354	8.2835	12.2105	2.81027	5.82725	8.59884	3.84646
299	case	European American	8.48502	5.9031	8.30714	10.0141	6.29989	11.5205	11.2985	6.7324	8.93227	4.19689	11.5517	4.18322	9.75235	8.736	7.12491	4.58219	3.5465	8.83027	7.82844	11.9865	9.56821	4.59601	10.7664	7.9003	9.50297	12.5021	3.28121	5.72523	8.78739	8.58621	7.47391	5.38935	6.87535	9.48962	5.75864	13.0272	6.3432	4.12702	7.07094	10.5946	5.18745	7.22752	11.7557	3.61397	5.27915	8.89404	4.75467
300	case	African American	9.48664	6.25136	9.01772	10.2645	6.91265	11.7224	11.5191	6.54329	9.12946	3.09199	11.0253	5.27886	11.0939	8.21687	7.55136	5.25925	3.29209	8.85955	8.15823	12.143	9.90662	6.01335	12.0182	6.3873	9.86429	12.6262	3.62696	7.34694	9.6571	9.28563	7.55732	5.78412	8.8544	9.10782	6.71333	13.3378	7.31779	4.39694	7.04078	11.0689	5.41992	6.9897	12.4227	3.80123	5.71595	9.17891	4.22445
301	control	European American	10.3469	7.04949	8.84363	10.1707	7.13661	11.9694	11.591	6.4628	9.36833	4.22542	11.9914	6.06088	10.1912	8.70392	9.04055	6.07848	3.59409	9.55851	7.75392	12.7195	12.5972	6.8839	11.2986	7.42019	9.84598	12.6711	3.74942	6.8918	8.53445	10.8619	7.80039	6.23225	9.01348	9.76673	6.61605	14.1269	7.00483	3.81538	7.77905	12.0387	6.35193	9.68706	12.4772	4.31327	5.91598	9.22325	4.85038
302	case	European American	7.40375	8.42096	9.01849	9.19412	6.51239	10.5465	11.2196	6.6522	9.79502	5.32849	11.5412	5.45528	10.013	8.77917	8.86209	5.27513	4.2611	9.82093	7.56425	12.8212	10.5792	4.22449	12.2093	5.53831	9.68376	12.6654	4.30742	6.17403	8.90111	8.28939	7.86751	6.12989	9.95638	9.4436	6.27399	13.2559	7.6912	5.17114	7.61752	11.633	6.34761	6.87974	12.4033	4.68184	5.92237	9.55082	6.04006
303	control	European American	8.21066	6.71501	8.14755	9.47126	6.25691	11	11.2642	6.05845	8.71168	4.0684	12.4997	5.2002	10.9218	8.13665	8.74704	4.53815	3.4942	9.4139	7.38993	11.9732	9.53428	6.18024	11.0768	7.03613	9.62027	12.6287	3.88877	6.42787	8.96612	8.45644	7.64619	5.40037	8.84494	9.46535	6.21778	12.853	6.75647	4.72666	7.30063	11.0906	5.95038	7.25204	11.702	4.03069	5.61235	8.86114	4.81923
304	control	European American	6.36871	5.93353	8.28971	9.35009	6.54506	11.2397	10.9863	6.54665	8.49811	3.6673	11.4146	5.06897	10.0323	8.22044	8.22853	4.94827	3.4633	8.50676	7.18009	11.3264	8.86849	5.43782	9.9938	5.89819	9.41029	12.5933	3.55229	5.98077	8.50336	7.29695	6.87841	4.96757	8.62794	8.72122	5.84013	13.0135	6.79836	4.06591	6.3846	10.2668	5.09698	5.34408	11.5302	3.52626	5.5258	8.7704	4.26634
305	control	African	12.0799	8.7317	9.47117	8.57553	8.98534	11.0469	11.0031	6.74771	9.20017	6.95024	11.9161	7.77816	10.5645	8.90726	10.5776	6.14841	4.53434	9.60707	7.63359	12.0294	12.265	11.2517	12.8261	7.27617	10.0423	12.4672	5.43134	8.20712	10.1229	11.2038	7.4278	7.44226	9.50877	9.53421	8.6138	11.2492	8.14465	5.54529	6.55676	11.4308	6.88769	11.3915	11.8721	4.11965	5.47255	9.23193	5.5326
306	control	African	11.7801	6.20977	8.76437	10.1231	7.31462	12.687	11.4839	5.5214	8.7751	4.46511	10.7017	6.08474	10.5362	8.66302	8.33635	5.55772	4.4077	8.74289	8.1509	12.4401	9.7447	8.2209	12.0392	7.17778	10.19	12.6056	3.69864	7.26474	9.65675	9.84828	7.50415	5.83922	8.73557	8.96048	6.85503	12.039	7.44982	4.93638	7.2445	10.2786	6.26067	8.61179	12.314	3.5611	5.58745	8.89097	4.25805
307	case	African	14.7566	6.48746	9.73485	6.33955	7.80145	12.7364	11.0039	7.45046	9.13987	6.84342	12.3294	5.99145	11.1746	8.07255	8.06076	5.55467	4.2119	9.17519	8.17002	12.9085	9.49774	9.97682	13.0786	8.76205	10.227	12.3567	3.92816	7.08416	9.40321	10.6604	7.19671	5.99268	9.01182	10.2441	7.01968	10.7525	6.98971	5.27204	6.9279	10.2438	6.29302	11.3566	12.2861	4.12984	5.85819	8.96495	4.3572
308	control	European American	10.1888	7.41921	9.35916	10.3196	7.6308	12.3622	11.1389	6.93254	10.1247	4.00793	12.4528	6.44996	10.524	9.59133	9.49995	7.04305	4.30278	8.99496	8.09419	12.9034	10.94	6.85555	11.0159	6.96319	11.1527	12.4907	4.82761	7.34178	9.66867	9.65156	7.95462	6.57136	9.55857	9.6863	6.90655	13.5533	8.12821	5.25168	7.74343	12.5867	6.6177	8.81624	12.3985	4.97444	6.11309	9.71485	6.07053
309	control	African	9.07474	6.966	9.06818	9.68152	8.51072	12.0736	11.198	6.86288	9.32122	5.7314	11.5338	6.88937	12.3866	8.9839	8.90235	6.08625	4.35999	8.66854	8.00379	12.3697	10.4327	8.37148	12.2181	6.90928	10.077	12.3818	4.52806	6.94497	10.1015	10.625	7.8691	6.62014	8.7972	9.97312	7.20425	12.2584	7.31094	5.48319	7.22082	11.3007	6.42998	8.78684	12.3361	3.48375	5.55047	9.36895	5.10232
310	case	European American	8.39128	6.64564	8.79171	8.45123	6.67748	9.43169	11.0796	7.89402	9.29352	4.02887	12.9167	5.41578	10.7591	9.1747	8.37391	5.14519	3.87438	8.91332	7.81606	11.5733	9.92886	4.95432	11.2041	5.77943	10.101	12.5355	3.69504	6.94884	9.78827	9.58259	7.74642	5.86989	8.57164	9.4755	6.2059	13.0555	7.56237	5.27344	7.38007	11.7074	5.16196	7.42762	12.1183	3.99474	5.72043	9.1136	5.13067
311	control	African American	8.27628	5.7716	8.89472	10.4632	7.03885	12.1095	11.5718	6.42439	8.99792	3.25766	11.4263	4.66085	11.9115	9.02565	6.95215	5.44297	4.18023	8.41945	7.78675	12.4549	10.3249	6.05859	13.0708	7.01725	10.2629	12.5296	2.78444	7.31222	10.181	9.96164	7.51289	5.77703	8.10922	9.33779	6.26058	13.7242	7.40837	4.18011	7.0361	10.7784	5.2754	8.04577	11.7371	3.89909	5.70469	9.19721	4.67846
313	case	African	8.97869	7.42309	9.95493	8.56931	6.53617	12.0296	10.9099	6.24444	9.38893	4.08062	11.4452	5.17079	10.3584	6.61522	9.38613	4.44801	4.67144	9.10184	7.63178	12.1213	9.74961	7.58895	12.1232	6.82949	8.99611	12.4508	4.02948	4.96677	8.32957	8.31825	7.8457	6.60762	9.69626	9.18687	6.0204	9.17264	7.05205	5.10596	7.2136	10.7625	5.704	7.62557	12.4774	3.37279	5.43821	8.96058	4.89373
314	case	African	9.84863	5.96823	10.4037	6.2182	6.442	12.4994	11.0109	5.74044	7.97211	3.88834	8.95892	4.25212	10.0705	6.83867	8.94702	5.42145	3.67295	9.35702	7.1191	11.922	8.40528	8.45223	11.3769	6.4305	7.32355	12.0652	3.47367	4.37052	7.66009	8.77367	6.65515	7.06715	9.00078	8.72644	6.9447	9.0965	5.95285	4.2191	5.75657	9.95452	6.26124	7.47651	11.6405	2.64836	5.02852	8.44129	3.74451
315	case	African	12.8615	6.77663	10.4892	5.60121	6.9227	11.1004	9.32378	3.91094	8.71485	4.67309	10.2523	5.81275	7.69886	6.8115	8.30835	5.66872	3.79398	8.95615	7.60047	11.1951	8.17141	7.99233	10.5763	7.23003	7.42966	11.6396	3.91098	5.22295	6.8297	8.89554	7.48451	6.69667	8.39115	9.35112	6.51894	9.674	6.48573	5.03302	6.33998	10.4417	5.47628	8.49277	12.1442	2.76075	5.63109	8.77702	4.00412
316	case	European American	7.01897	6.14031	8.15574	9.34903	6.19733	10.8427	11.0914	6.40279	8.54525	2.92811	11.4149	4.97317	9.7407	8.48624	7.75312	4.99358	3.53922	8.66418	7.35661	11.3643	8.44516	4.02409	10.3956	6.09213	9.28266	12.3897	3.77322	6.5084	7.73662	8.17346	7.14256	5.42127	7.95222	8.9193	5.80624	12.3118	6.54125	4.02068	6.57293	10.801	5.1767	6.83243	11.9787	3.25188	5.62968	8.65918	4.13624
317	control	African	9.45958	6.14979	9.09127	9.19877	6.40973	11.8697	11.3412	6.29697	8.78366	3.63816	10.7259	5.50374	10.7032	8.14168	8.02088	5.43007	3.34134	8.64493	7.65923	11.9196	9.1882	6.27573	12.8741	6.10913	9.81031	12.6782	3.62849	6.97562	9.31085	9.44358	7.6815	5.92252	9.09043	8.58827	6.55999	9.71277	7.41874	5.43777	6.59746	10.069	5.42106	8.27334	11.8828	3.02867	5.70131	8.97573	3.9196
318	case	African	15.1466	7.29881	9.0527	9.55771	7.02409	12.7194	11.6544	6.39712	9.40316	9.66285	13.2886	6.19614	9.98967	7.88548	8.599	4.99076	4.23255	9.76328	7.71371	12.8275	9.98417	7.27715	13.3053	9.57906	9.49686	12.8594	4.16329	5.9531	8.78019	12.0748	8.06183	6.19278	9.89188	10.6665	6.98801	12.0595	7.57927	5.71749	7.60045	11.1353	6.50843	13.6858	12.6673	4.01118	5.48817	9.17068	5.07559
319	case	African	14.5132	5.76173	8.81427	5.58437	6.41193	12.3835	11.321	5.64744	8.37271	14.7616	14.622	5.74203	10.2634	7.70909	7.31664	4.12677	3.33645	9.03918	7.68953	12.4168	9.15839	5.95537	13.8559	7.91937	9.09154	12.7559	3.15993	6.55748	8.96209	13.7828	7.36814	5.23731	8.54398	9.54188	6.23406	11.2561	6.25811	5.4736	6.2245	10.5747	5.85017	14.3766	11.6985	3.06476	5.12144	8.31577	3.564
320	control	African	12.1688	7.41032	8.17082	9.76441	6.96428	12.3808	11.3779	6.38848	9.08842	4.53621	11.2988	6.63704	10.0822	7.99926	9.21806	5.22761	3.19614	9.39705	7.48874	12.6427	9.38996	6.50277	12.4617	7.11773	9.43057	12.7297	4.93937	6.3439	7.4373	10.4494	7.88606	5.79287	9.19409	8.66957	6.26324	12.203	7.18638	4.22336	6.79854	10.7653	6.36974	9.66189	12.4966	3.99491	5.39022	8.85819	4.83196
321	case	African	14.7694	6.87785	9.33186	6.21628	7.28605	12.067	10.7374	6.80536	8.95313	14.5211	14.5717	6.24988	10.7586	7.98198	9.03034	6.40342	4.31762	9.23611	7.53058	12.468	9.31065	7.77402	13.3702	8.79745	9.31356	12.6854	3.77027	6.36583	8.71536	13.7859	7.57604	5.73087	9.02897	10.2522	6.181	9.9234	7.02658	5.73125	6.64754	10.2577	5.76179	14.259	12.4242	3.7199	6.28636	8.97897	4.54115
322	case	African American	7.59629	6.01859	8.77054	8.29568	6.7167	10.349	10.8669	6.03554	8.82671	3.15596	11.287	5.03255	9.06877	8.63711	7.24325	4.4393	3.56913	8.62776	7.77551	11.7678	8.55122	5.65281	11.917	4.87165	9.92781	12.4794	3.40864	6.61746	9.16659	8.61787	7.52181	5.17013	8.5532	8.60304	5.97323	12.9845	7.49839	5.10339	6.77208	10.5862	5.75766	6.68959	12.2071	3.49383	5.84909	9.20778	4.29809
324	case	African American	7.3741	6.19583	8.55058	9.16131	6.58183	10.3887	11.057	6.57273	8.83126	4.35049	11.6123	4.51998	10.7426	8.60382	7.65406	5.04948	3.38591	8.68551	7.97433	11.7029	8.6979	5.86226	12.1935	5.751	9.78772	12.5295	3.51026	6.34627	8.90879	8.43098	7.6604	5.50797	8.56391	8.68138	6.4079	12.139	6.99799	4.69072	7.02961	11.2081	5.58112	6.91065	11.7722	3.45919	5.55668	9.00096	4.57023
325	control	African American	9.17537	6.06029	9.14075	9.71052	7.13691	12.3391	11.6044	6.92393	8.89853	3.67496	11.2806	5.62926	10.6881	8.9231	7.56077	6.10907	4.0981	8.8525	8.02981	12.324	10.1787	5.40042	12.2856	7.30539	10.3765	12.5382	3.6601	6.51093	9.73397	9.65679	7.67355	5.60304	8.40448	9.40402	6.57131	13.2505	7.17463	4.97299	6.74167	11.1264	5.37088	9.43817	12.3433	3.52453	5.97587	9.11119	3.97668
326	control	African American	15.0274	7.63436	8.67826	9.2008	6.74837	11.9717	11.094	6.1258	9.96832	5.43054	12.8567	6.35719	10.0831	8.67859	10.1146	6.33352	4.65524	9.51576	7.66945	13.0709	9.2779	5.92643	11.7197	8.18327	9.70875	12.2278	4.89172	7.07935	9.36611	10.5296	7.90959	6.44142	9.86393	9.90203	6.63525	12.404	7.89998	4.78278	7.57275	11.8323	6.17421	9.51473	12.1762	4.94465	5.97989	9.29817	5.7562
327	case	African	9.42656	6.44627	9.08773	7.16743	6.70991	11.032	10.7789	5.51549	9.11801	3.60448	10.2872	5.44333	9.43864	8.48555	9.25952	4.30674	3.90107	9.59754	7.38402	11.6584	9.45229	7.3841	12.1492	7.61435	8.95172	12.2541	3.2652	6.54559	7.54237	9.27055	7.40364	5.9258	9.25131	9.46398	5.59921	13.7961	6.80866	3.73399	6.57438	12.6105	5.38222	8.24707	11.5286	4.5006	5.45823	9.01694	4.89482
328	control	African	11.6394	5.69565	8.64989	9.80765	6.8374	12.4127	11.485	6.63567	8.48969	3.94677	10.5053	5.74596	10.0708	8.34438	9.56573	6.30699	3.72048	8.57892	7.87599	12.0953	9.86758	5.22261	12.4763	6.96346	10.0654	12.5242	3.27087	6.32706	8.87029	10.2188	7.67926	6.29391	8.96422	8.87236	6.35189	13.019	6.98711	4.28177	6.3302	10.6171	5.95147	9.35123	11.4398	3.05421	5.6081	8.77882	3.82293
329	control	African American	10.371	5.6577	8.73401	9.65677	6.46714	11.8904	11.1653	5.8562	8.3726	4.11275	13.4686	4.96183	10.1362	8.48242	7.87542	5.92186	3.44749	9.16658	7.92616	11.5459	9.79479	6.92392	12.1963	6.68487	9.83096	12.263	3.08474	5.95587	9.2006	9.10125	7.25273	5.16635	8.44681	10.9309	6.45937	12.9943	7.07749	3.75607	6.31895	9.91254	5.11198	9.08888	12.1696	3.24034	5.52402	8.95795	4.28821
330	case	African	14.5672	6.77397	10.1683	6.5688	7.53163	12.2408	10.8413	5.82006	8.57318	7.04252	11.2183	6.61282	10.0517	7.34606	8.42028	5.90911	3.74096	9.2705	8.00696	12.4747	10.2963	12.3896	12.6174	8.73972	8.46439	12.6803	3.60343	6.98326	8.19115	13.4885	7.37745	6.17723	9.08329	10.3367	7.16547	10.3091	7.27762	5.43288	6.63115	9.59006	6.20399	12.9992	11.7536	3.16017	5.90899	9.20178	4.12993
331	control	African	13.1154	5.96159	8.41367	9.61191	6.96464	12.4071	11.4265	7.02469	8.56769	4.42564	11.0616	5.20492	9.90968	8.82682	9.26832	5.83404	3.7954	8.79234	7.38048	12.2161	9.16075	7.50351	12.7492	6.80481	9.97023	12.5502	3.14335	6.41675	8.79171	10.1982	7.17121	5.65966	8.76043	8.91761	7.46579	12.1939	7.01895	4.29964	6.52599	10.2272	5.60178	10.1171	12.066	3.12949	5.74151	8.79769	4.11559
332	case	African American	6.72866	5.51913	8.58567	4.43706	6.24397	7.70663	9.29352	4.93837	8.43657	2.42412	10.7579	4.44857	8.66316	8.33353	6.59068	4.54652	3.18722	8.27222	7.52518	11.1946	8.7833	5.5025	11.2591	3.85778	9.01404	11.8613	3.19436	6.57917	8.23963	7.50497	7.05601	5.0659	7.90634	8.16203	5.23832	13.1131	6.87065	4.44332	6.43439	10.415	4.95861	6.25655	11.6718	2.77768	5.2921	8.5119	4.12753
333	control	African	9.19874	6.62536	8.5807	9.79383	7.6409	11.9847	11.4833	5.98978	8.93413	3.71439	10.7665	6.67166	10.8347	8.64764	8.92241	6.19252	3.82436	8.78406	7.61684	12.32	10.2052	6.53794	12.2549	6.69656	10.0503	12.6586	4.13579	6.64123	8.89846	9.54056	7.68165	5.5769	9.10055	9.3588	6.90231	12.7912	7.37209	5.33275	6.51151	10.5172	5.60539	8.2513	12.2372	3.49715	5.96946	9.08208	4.3458
334	case	European American	8.77461	6.96105	9.05382	9.53788	6.80617	11.6484	11.0052	6.93013	9.49385	5.71001	12.3621	6.21947	10.2033	8.75627	10.5281	5.31959	3.30444	9.41163	7.7052	12.4625	10.9692	5.73887	10.4773	7.9861	9.69058	12.6283	4.22008	7.18277	9.25796	9.60536	7.67819	5.79894	8.84581	9.8442	6.1854	13.9158	7.55672	5.35856	7.12537	11.0949	5.72686	8.05392	12.2932	4.63917	5.69366	9.35727	5.57952
335	control	African	9.33232	7.19998	8.63277	9.06481	8.25792	11.1018	10.8829	6.12234	8.55031	3.29957	11.1027	7.64217	10.0659	9.33526	9.27326	4.98236	3.73403	9.31232	7.53311	11.7957	11.0018	8.79819	12.0729	5.68595	9.70207	12.5581	3.80836	7.17237	9.4506	9.48227	7.35585	4.99267	8.56573	8.53613	7.74301	12.8702	7.03848	4.32879	6.6245	10.3274	5.79901	8.1102	11.563	2.92645	5.02772	8.49209	4.34059
337	case	African	15.0137	6.80589	8.97699	7.94999	6.61738	11.8303	11.2541	5.78466	8.74356	11.0414	11.5118	6.31822	10.0022	8.2766	8.86995	5.64579	4.58836	8.95591	7.57993	11.8947	9.6557	7.39708	12.6967	8.43611	9.54719	12.7622	4.41058	6.40969	8.98953	12.8449	7.9227	5.51072	9.27041	9.82453	6.47438	10.0885	6.69495	5.22455	6.43012	10.427	5.98571	14.339	12.3181	3.11226	5.20802	9.04552	4.45673
338	case	African American	8.51981	6.78111	8.40582	9.78018	6.88217	11.3389	11.3644	6.812	9.28965	3.64715	11.8524	5.58297	9.92837	8.70583	8.30248	5.65635	3.66137	9.24333	7.76435	12.1414	8.93264	6.94205	12.2246	6.80837	10.0681	12.611	3.78028	6.48801	7.00256	8.80159	7.65056	5.58069	8.86612	9.59297	6.45183	12.1117	7.28141	4.59108	7.24293	11.0772	5.74516	8.36928	12.4722	3.62821	6.41268	9.26693	5.17532
339	case	African	7.55682	6.49479	10.3372	7.93954	6.09717	11.7718	10.8227	5.8257	8.60566	3.06235	9.50179	3.60527	8.3333	6.64019	7.79209	4.43728	1.80039	8.57653	6.9023	11.5211	9.37154	2.80417	10.2475	5.37088	5.75206	11.6654	2.66718	3.86289	7.20214	6.06285	5.09224	6.12736	8.87465	8.97049	4.58678	9.14721	5.65357	3.72815	5.82446	10.1073	5.00135	4.06125	9.48894	2.87546	4.36536	8.05686	3.75806
340	case	African American	7.02852	6.0423	8.81432	9.53885	6.32809	11.8161	11.1558	6.58615	8.89358	4.3004	10.9053	4.58083	10.6644	8.44466	7.8544	5.53315	3.65417	8.62213	8.07951	11.7544	8.97413	5.86626	12.4315	6.50527	9.86967	12.5987	3.72154	6.95247	9.6473	8.70009	7.56716	5.55701	8.68592	9.42444	6.16515	13.0083	6.97361	4.81931	6.40612	11.9321	5.5039	7.89978	12.3434	3.90107	5.87324	8.98493	4.63509
341	case	European American	7.10369	5.5949	8.60562	9.26099	6.39772	10.6209	11.2162	6.82024	8.66283	4.266	11.594	5.23356	9.47318	8.52509	7.13915	4.79051	3.68169	8.15506	7.80008	11.5876	10.1136	4.50436	9.91132	5.69672	9.80854	12.6499	3.53913	6.81933	8.57586	8.64404	7.01707	5.31016	8.10256	9.00481	6.08063	13.6912	7.11639	3.88474	6.56789	11.1456	5.25573	6.71149	10.5225	3.07974	5.57067	9.08598	4.02905
342	control	European American	7.06534	6.07562	8.6925	9.02192	6.8166	11.3988	11.1138	6.82419	8.91781	3.8898	12.2239	5.48013	9.69731	8.40819	7.26285	5.00457	3.48224	8.53325	7.47428	11.9712	9.58692	5.45707	10.5803	6.48208	9.7556	12.4825	2.97813	6.29735	7.851	9.75758	7.42565	5.36479	8.53272	8.75307	5.85806	13.3684	7.32711	4.09628	6.29393	11.4094	5.64994	7.6315	11.7472	3.46797	5.63792	8.87924	4.45414
343	control	European American	13.6022	6.5195	8.31944	9.71669	6.58424	12.0615	11.1876	6.51961	8.80911	4.11158	11.9622	5.07075	10.3909	8.79774	7.96685	4.79893	4.98446	9.40046	7.74025	12.3416	10.3416	6.43124	10.8246	7.40181	9.97157	12.6911	3.67799	7.12522	9.15552	9.2606	7.59732	5.53805	8.46552	9.4178	6.76442	12.7302	6.80537	4.72064	6.73462	10.648	5.43267	7.99197	11.7038	3.67668	5.41355	8.93262	5.03759
344	control	African American	6.75979	7.65115	8.83489	10.1122	6.81826	11.4528	11.3952	6.46211	8.76198	8.5312	11.4472	7.11657	9.97671	9.07844	8.81973	4.63115	3.63137	8.94463	7.78797	11.6937	9.74745	7.78265	11.9291	6.48546	9.95417	12.6272	6.08273	6.56712	8.54219	9.5357	7.39716	5.88387	8.54011	9.44465	6.91147	13.1282	6.52986	3.59206	6.19506	10.8867	5.85384	7.56922	12.0482	3.8473	5.39586	8.75363	5.4741
345	case	African American	7.92971	6.17625	8.4899	9.84955	6.42159	11.6036	11.4095	7.63952	8.88057	5.34785	11.8321	5.07003	12.3403	8.40281	10.3952	5.02718	3.36991	9.09075	7.97535	12.1146	9.69276	5.53397	12.7696	6.9057	9.56739	12.6136	2.91049	6.54819	9.65659	8.85562	7.49812	5.67668	9.21716	9.09911	5.82812	12.5022	6.76996	4.76887	6.70014	11.1651	5.7247	7.06104	11.931	2.94878	5.48255	8.9284	4.56159
346	control	European American	9.64359	6.46269	8.86273	10.5048	7.01225	12.2265	11.75	7.28045	9.00733	2.5678	11.7262	5.46731	10.2552	8.75117	7.88056	4.95423	4.49423	8.71584	8.06431	12.103	9.18229	4.9488	10.9932	7.44667	10.3066	12.6903	3.63112	7.19849	8.90845	9.41818	7.48081	5.55263	8.39055	9.67907	5.73357	13.0415	7.22407	4.73123	6.95737	11.4745	5.49301	7.64688	11.6443	3.76842	5.8372	9.35984	4.93906
347	case	European American	7.18085	6.17052	8.49428	9.57956	6.24243	11.2618	11.1007	6.42159	8.6317	4.17925	11.6477	5.02802	10.549	8.49725	8.09945	4.76837	3.08196	8.7712	7.97626	11.7456	9.85387	5.05346	11.25	6.19932	9.50654	12.5063	3.63574	6.6052	8.01669	8.23911	7.2465	5.47137	8.60566	9.04556	5.71822	12.7575	6.89806	4.68017	6.77094	10.8295	5.08489	6.72204	11.8701	3.7261	5.43048	8.88523	4.17629
348	control	European American	8.26626	7.08228	8.30445	8.27272	6.63334	10.0113	11.0038	6.04737	9.40768	3.48881	11.9824	5.82543	9.7821	8.93628	8.57207	5.52621	3.90613	9.2231	7.86698	12.0824	9.40054	6.21279	10.5699	6.22125	9.7216	12.623	4.59859	6.7635	7.95281	8.83189	7.601	5.72566	9.24239	9.05413	6.571	12.6411	7.28272	5.3781	7.2673	11.0705	6.18785	7.45581	11.9808	4.58963	5.88163	9.26698	5.14751
349	case	European American	12.1279	7.28572	9.19561	10.3135	6.92738	12.835	11.4856	5.8477	9.46361	5.47165	12.3814	6.19717	10.2074	9.36862	8.67957	4.34573	3.94025	9.66766	7.88815	13.365	11.952	6.86498	10.7202	8.09125	10.5562	12.8017	4.20271	7.34905	8.3149	10.6135	7.83349	6.45615	9.71181	10.7365	7.11157	13.8301	7.38657	5.02834	6.88719	12.1743	6.20196	8.32012	12.6901	5.03402	5.95725	9.13187	5.49962
350	case	African	11.6166	6.76802	9.03542	9.094	7.32754	11.8417	10.8407	6.11068	8.84017	6.31482	10.6794	7.25314	9.65723	7.92979	8.96477	4.25958	5.04882	9.30013	7.67417	12.3004	10.4648	8.14428	12.421	8.28642	9.87802	12.5334	3.34259	6.3469	8.12001	9.56844	7.80702	6.68404	9.04129	9.90881	6.91537	10.7364	6.78538	4.30332	6.66878	11.6212	5.70782	9.9989	12.3347	3.15158	4.98696	8.77263	4.2463
351	control	African American	8.52206	6.00283	8.7226	9.90893	6.70194	12.2163	11.4455	6.60634	8.91511	3.97408	10.9039	4.91379	10.2805	8.92929	7.98786	5.14067	3.56845	8.23378	7.74084	11.9761	9.57487	5.82245	12.758	6.65331	9.78019	12.6901	3.64549	6.71265	9.20537	8.8802	7.37503	5.88637	8.46471	8.6388	5.92751	12.6371	6.94696	4.55179	6.63719	10.3319	5.57272	7.71339	11.776	3.23949	5.5946	9.20372	4.57862
352	control	African American	11.5355	6.47481	8.59646	9.86739	7.02343	12.4139	11.3612	5.65124	9.12685	4.63811	11.7614	4.54016	9.7028	8.97811	6.87028	5.24001	3.16415	8.95178	7.65915	12.1499	9.52691	6.27464	11.5642	8.0522	9.80869	12.6758	3.67997	6.284	8.79492	9.38297	7.68759	5.62818	8.9285	9.77535	5.89763	12.548	7.0362	4.97286	6.60039	10.3943	5.66369	8.44985	12.2934	3.73949	5.69913	9.08198	4.36044
353	control	African	11.576	6.51766	8.66228	10.1914	7.35132	12.5502	11.1792	6.4924	8.87803	4.12072	10.9999	5.74465	10.1156	8.3365	8.09561	5.24069	4.16625	8.78792	7.77292	12.0957	10.9265	8.93567	12.2612	7.8731	9.38333	12.6506	3.57669	7.92766	7.88571	12.2203	7.69812	5.83233	8.66044	9.34478	7.77908	13.2239	6.29618	4.54021	7.44052	11.0414	5.84692	10.1501	12.2427	2.78661	5.04048	8.53107	4.0081
354	control	European American	9.40273	6.87115	8.81438	8.8181	7.17305	12.4811	11.4914	6.04266	9.0707	5.94783	12.8328	5.0571	10.9325	9.37246	8.38493	5.61644	3.59048	8.92283	8.12323	12.4768	9.55839	6.49027	11.562	8.5837	10.4166	12.5674	4.36317	7.40482	9.3056	9.17449	7.72294	8.31808	8.83466	10.2206	7.126	13.296	6.85014	4.85189	6.74644	11.6163	6.17058	7.49063	12.1106	3.93646	5.61909	9.25905	4.86585
355	case	African	15.2699	7.2748	10.6585	7.5058	7.52251	13.2327	11.1524	5.95081	9.40048	7.2958	13.1093	5.80908	8.97555	7.48561	8.09394	4.30745	4.35176	9.14889	7.73749	13.3321	9.58989	8.46225	12.8792	9.20613	9.16632	12.593	3.1994	5.31148	8.27983	10.3439	7.78999	7.26214	9.31731	10.5457	6.81188	8.94632	6.50685	4.83966	6.60566	11.2112	6.19838	11.32	12.3566	3.62759	5.32591	8.85691	4.63052
356	case	African	14.2603	6.11644	10.1802	8.70299	6.94197	12.5989	11.205	6.36265	8.4416	5.89777	10.7324	4.87231	11.2782	6.79182	9.02488	4.88198	4.3527	9.06257	7.692	12.3872	9.36081	10.7309	12.144	8.31568	9.03687	12.4405	3.26465	5.29746	9.19633	9.63188	7.63921	5.97954	8.81966	9.63308	7.00802	9.51392	7.00925	4.7565	6.49486	10.7941	4.98911	13.0857	12.0797	2.72528	5.56327	8.53309	3.84248
357	control	African American	8.33632	6.51655	8.67387	9.85245	6.30059	11.9223	10.8734	5.79859	9.36652	3.7168	12.5631	5.32885	10.0291	8.81271	8.67645	5.4789	3.90919	9.09054	7.40697	12.2385	9.2369	5.47918	11.6059	7.69204	9.76866	12.5169	3.70918	6.56114	8.85824	8.93164	7.7165	5.58519	8.52379	10.1085	6.57788	12.5929	6.97999	4.84292	7.46997	10.7151	5.51682	8.07282	12.4159	3.64702	5.93055	9.24277	4.7422
358	case	African American	8.87385	5.73118	8.15727	9.52207	6.35538	11.2957	10.7515	6.43971	8.66457	3.74148	12.5491	4.13052	10.5497	7.80718	7.17177	5.13027	3.2719	8.34952	7.3813	11.7618	9.25733	5.16123	11.6831	6.65052	9.62472	12.4891	3.11502	6.54716	9.06329	8.48474	7.56696	7.47931	7.57309	8.74552	5.63037	12.7137	7.27046	4.42857	6.79561	9.86151	4.50407	7.08911	11.5029	2.8522	5.5565	8.82923	3.65108
359	control	African	11.7966	7.56311	9.21765	9.74526	7.19575	12.3579	11.1212	5.85321	9.20488	5.77644	11.6482	7.0941	10.4226	8.25668	11.2502	4.89112	4.30666	10.0952	7.99608	12.4289	10.9345	9.94426	12.455	7.60986	9.77234	12.6187	5.61534	7.33613	10.2226	9.82403	8.05048	6.61606	9.5658	9.63829	8.49101	10.1864	7.44946	5.79451	6.86888	10.349	5.98126	9.04487	12.3779	3.90192	5.39173	9.0142	5.11312
360	case	African	15.2022	5.44609	10.5555	6.2442	7.10697	12.7603	10.9838	6.19316	8.46152	11.9467	14.261	3.84778	9.81611	6.46491	7.40178	5.18768	2.46408	8.27225	7.21889	11.6064	8.38815	6.02225	13.2758	7.2946	8.17547	12.5027	3.39304	4.11101	8.74719	11.6025	7.0609	6.87702	8.81319	9.37802	5.278	9.31624	6.99545	5.27197	6.33361	9.47251	4.88767	13.1445	12.0229	2.14535	5.75344	8.69785	3.5604
361	case	African	13.009	5.62614	10.5319	5.55583	6.97092	12.9988	10.9102	4.99106	8.19135	4.67571	10.0416	4.6318	8.72923	6.71064	7.44825	4.09239	2.88931	8.67387	7.99942	11.5107	8.71148	6.20184	11.2403	8.09269	8.29634	12.1599	3.09386	4.97302	6.99042	8.67443	5.77567	6.15154	8.94278	9.31146	4.83416	8.96228	7.71039	4.74723	5.98725	9.73421	5.77256	8.38047	10.6064	2.72802	5.58518	8.51255	3.24911
362	case	African	11.2723	6.2901	8.81894	8.68844	6.86739	11.9212	11.479	6.79886	8.59315	4.08602	10.6447	5.4015	11.8817	8.49666	7.80036	4.57879	3.9389	8.88048	8.02805	12.1809	9.63911	5.875	12.8545	8.67086	9.70281	12.5678	3.58794	6.84098	9.56507	9.30432	7.65911	5.23489	8.47842	10.2084	5.7862	12.3088	6.91462	4.39203	6.21279	10.6728	5.50974	9.51952	12.2707	3.04177	5.55878	8.83982	4.16493
363	control	African	10.867	5.33135	9.41274	9.03625	6.67917	12.2395	11.1079	6.69233	8.35495	4.38334	10.6141	5.73046	10.6105	7.67594	7.2591	5.9521	2.88204	8.14849	7.78275	11.6319	8.85847	6.28667	11.8273	7.06629	9.78231	12.5243	3.07333	6.27143	9.20987	9.55005	7.261	6.07788	7.99742	8.83941	5.79467	10.6264	7.2566	4.39963	5.82323	10.162	5.07358	9.5163	11.8269	2.81284	5.84086	8.78474	3.59634
364	control	European American	15.0448	6.2902	8.73863	10.2997	7.12282	12.3941	11.2466	5.7218	8.48181	4.14284	12.848	4.88365	9.63094	8.38071	7.67018	5.28441	3.54956	8.38464	7.78153	12.2533	10.0819	5.04666	10.6687	8.41297	9.93085	12.6392	3.84026	7.23456	8.78766	9.79908	7.53957	5.84566	8.27871	9.47072	5.99592	12.8542	6.99074	4.39221	6.5075	10.6963	5.27219	8.62603	11.6064	4.0169	5.42537	9.08112	4.34901
365	control	African	11.4867	6.26646	8.9702	10.1003	6.70254	12.2556	11.3504	6.67822	8.80094	3.93339	10.8344	6.22288	11.4784	8.16826	8.61103	6.69369	3.15528	8.82259	7.52049	12.2022	8.54807	6.70478	12.6569	7.44461	9.90426	12.606	3.71534	6.66038	9.0138	9.54923	7.42192	5.68352	9.09135	8.79652	6.25538	11.1699	7.49565	5.0888	6.76555	10.6077	5.61751	9.39551	12.3428	3.27808	5.527	8.95574	4.13663
366	case	African	13.2038	6.67149	10.2279	8.07581	7.43901	12.687	11.2648	5.63096	9.00929	4.54208	10.3518	5.92393	10.9206	7.61123	8.12723	4.76636	3.8626	9.22414	7.74736	12.5729	9.2979	6.79268	12.0818	8.0673	9.03559	12.5403	4.65081	6.28412	8.61915	9.73865	7.97839	6.15653	9.41748	10.1419	6.86961	9.61163	7.07667	5.58217	6.32248	10.4736	6.0119	10.1991	12.0873	3.93467	5.90393	9.23122	4.41544
367	control	African	8.13089	7.18419	8.32067	9.11568	7.42279	11.6849	11.1439	5.57538	8.76879	3.47325	10.8646	7.25929	9.81871	9.03991	9.28419	5.63636	3.90102	9.01483	7.89996	11.5221	10.8636	7.6763	12.302	6.44395	9.7925	12.616	4.25311	7.06463	8.70871	9.57521	7.42014	6.24682	8.8696	9.08764	6.98459	12.6508	6.75185	5.08106	6.99455	11.8281	6.11969	8.14244	11.8519	3.57528	5.39553	9.01389	4.67569
368	case	African American	8.53335	6.28896	8.72665	8.84221	6.21405	10.7129	11.1795	6.99584	8.97395	4.27447	12.4349	5.18829	9.4219	8.08154	7.37602	6.10045	3.22718	8.92476	7.44729	11.5959	9.01034	4.1804	11.254	6.58322	9.62422	12.556	3.67555	6.05304	8.54439	10.5736	7.59802	5.15197	8.67837	9.52553	5.74118	13.4862	7.13979	4.71065	6.44365	10.9912	5.20745	8.85825	12.2414	2.9775	5.59858	8.80224	4.82413
370	case	African American	8.29978	6.32178	8.84332	7.44916	6.22915	9.17863	11.0752	7.29012	9.03103	5.41312	12.3117	5.30551	10.3673	8.20106	8.87377	6.36308	2.84709	8.81457	7.94187	11.6884	9.81739	5.46872	10.9586	5.49777	9.24957	12.5418	3.50891	6.36536	8.74563	9.23251	7.4798	5.71823	8.45389	9.16865	6.02761	12.7367	7.14086	5.38411	6.43991	11.7574	4.85362	7.60169	11.838	3.68273	5.89321	8.767	4.80482
371	control	European American	15.1894	6.89247	8.80115	10.0118	6.84287	12.6971	11.5097	6.87546	8.82094	4.64757	12.3794	5.7864	10.6903	9.31547	8.43165	6.22056	3.90357	9.4397	7.81278	12.5109	9.85975	8.71416	12.2056	9.18311	10.743	12.6586	3.93226	6.51928	9.26426	9.90209	7.67523	5.56052	8.75472	10.4748	7.65186	12.6775	7.4209	4.97035	6.76754	11.6031	5.84723	9.29963	12.0682	4.10773	5.74851	9.34795	4.67534
372	control	African American	14.6141	6.37182	8.53227	9.67678	6.73629	12.6306	11.0648	5.69334	8.84248	4.17516	11.0557	5.201	10.6817	9.1382	7.40908	5.44774	4.72801	8.97062	7.46165	12.4779	9.66199	8.36478	12.1689	8.73679	9.92409	12.6	3.51967	6.83868	9.0246	9.05413	7.72575	5.25985	8.91454	9.81031	7.31446	12.3372	6.87785	4.40849	7.11683	11.4282	5.49935	8.27645	12.0757	3.18015	5.55412	9.14871	4.08206
373	control	European American	11.6439	7.07053	8.31019	9.36971	6.68055	11.5681	10.9226	5.81377	8.58737	3.89321	11.4388	5.63968	9.75442	8.49592	7.9489	4.93093	3.47892	8.6563	7.48552	11.7171	10.1212	5.49104	10.3116	6.98285	9.83078	12.4112	3.52998	6.43215	8.09875	9.05611	7.33714	4.89934	8.64432	8.84431	6.33305	12.5268	6.56661	5.10758	6.50311	10.7915	5.55001	8.91303	12.2861	3.397	5.62843	8.95996	4.1188
374	control	African	12.0886	7.43679	9.46161	8.93882	8.22285	11.4103	10.4412	5.43882	9.09032	7.08589	11.0301	7.62835	9.78056	7.97293	10.2869	5.46695	3.90612	9.2234	7.03751	11.81	10.7055	7.14717	12.0087	7.79355	8.86406	12.4438	4.29483	6.42059	9.30012	10.7033	7.30176	8.23231	9.50566	9.36343	7.21595	10.2859	7.83938	4.96807	6.60854	10.9203	5.88009	11.5388	11.8062	3.99156	6.17378	8.87614	3.92504
375	control	African American	7.35631	6.32395	8.39755	7.69614	6.43844	8.78822	10.8087	6.72145	8.95806	3.4703	11.0126	5.17866	9.97072	8.78759	8.61668	4.70704	4.03388	8.57301	7.58976	10.8364	9.69493	4.78425	11.9438	5.06139	9.37393	12.4342	3.46265	6.38275	8.409	8.00607	7.25896	5.33367	8.55304	8.76463	5.44897	12.3445	6.85251	4.5658	6.73844	10.8714	5.61218	6.92607	12.3286	3.36632	5.69833	9.05679	4.28467
376	case	African	14.5649	6.42187	10.4984	7.75764	6.9462	12.5551	10.7853	5.05302	9.06872	7.11946	12.4725	5.96742	10.8929	7.01246	9.25933	4.38155	3.50916	9.10115	7.25919	12.4022	9.27103	8.25705	11.8367	8.00784	7.80432	12.2656	3.75581	4.66127	8.90999	10.5488	7.29287	6.88953	9.16384	9.99423	7.09232	9.68919	6.99051	5.48667	6.57825	10.2777	6.31139	11.1547	12.0377	2.62412	6.25565	8.74356	4.72464
377	case	European American	7.2693	6.09751	8.178	9.47693	6.61286	10.0336	11.2675	7.14903	8.86566	3.90336	11.6911	5.61875	10.4619	8.77672	7.53268	5.52993	2.76984	8.76734	7.64312	11.5644	9.29547	4.86053	10.4548	5.62971	10.0167	12.387	3.55249	6.11104	8.82769	8.5212	7.45937	5.48667	8.34535	8.98868	5.77658	13.2655	6.71504	4.9515	6.6862	11.0314	5.28419	6.27884	11.3935	3.72432	5.9297	9.34271	4.68662
378	case	European American	7.60497	6.7187	8.07642	8.65191	6.45149	10.3657	10.4687	6.03795	8.88403	5.17139	12.0093	5.29407	9.73394	8.26648	8.08529	4.56359	2.61024	8.56532	7.15215	11.3838	9.01866	5.21796	10.0578	5.87351	9.66697	12.3978	3.70624	6.61268	8.50651	8.18967	7.31457	5.6679	8.80291	8.97146	5.99188	12.5158	6.75553	4.1227	6.91864	10.8114	5.20208	6.34613	11.8826	3.41864	5.64672	8.75221	4.40795
379	control	European American	11.8963	7.20136	8.40149	9.90053	6.68684	10.9299	10.7471	6.97536	9.64603	4.59208	12.0788	4.68492	10.5751	8.93553	9.6324	4.87902	3.56563	9.19455	7.61724	12.3937	9.59395	5.40169	11.3701	8.38599	9.51376	12.542	4.48359	6.76432	8.19133	8.23144	7.59853	6.14834	9.0026	10.4413	5.96961	12.7591	7.37698	4.45703	7.32628	11.7508	5.48444	7.93483	12.0838	4.76166	6.17338	9.4326	5.12085
380	control	European American	7.94783	5.89204	8.27227	8.14277	6.16766	9.48164	10.6822	6.52214	8.82788	3.12771	12.2815	4.63671	10.0176	8.39114	7.31993	5.07368	2.98933	8.30333	7.40682	11.2233	9.16831	5.45867	10.3025	5.46183	9.47333	12.4212	3.3432	6.30765	8.22633	7.89297	7.28996	5.04447	8.35852	8.4737	5.88598	12.8	7.0419	4.41815	6.69241	11.0204	5.52166	5.99475	11.587	3.15208	5.39115	9.03159	4.5554
381	control	European American	8.9043	6.30832	8.37037	9.7842	6.55354	11.3695	10.8255	7.09596	8.80275	3.93198	12.3704	5.39926	10.7353	8.39256	7.78008	5.26912	3.34053	8.73764	7.88639	11.6152	10.0335	7.53729	10.6825	6.63281	9.67804	12.5807	3.17586	6.36086	9.44527	9.02451	7.48946	5.63363	8.58068	9.02839	6.55194	13.3972	6.73981	4.3371	6.46662	10.9592	5.28932	7.16979	11.5987	3.0479	5.41437	8.87797	4.54735
382	case	European American	8.83605	6.47695	8.55376	9.58948	6.71684	11.1166	11.029	6.19336	9.17407	3.66959	12.2197	4.61684	10.8354	8.41961	7.928	5.32071	3.34544	8.93663	7.36483	11.9473	9.68984	5.03906	11.4698	6.78793	9.91459	12.5026	3.88202	6.49927	9.00475	11.3312	7.46226	5.56713	8.29623	9.67729	5.95339	13.1295	6.89363	4.16066	7.35775	11.2588	5.33567	8.76221	12.0912	4.19962	5.60846	9.34306	4.7376
383	case	African American	8.37244	5.54594	9.27002	9.89064	7.4266	11.0012	11.7308	7.70855	8.72559	4.79735	10.9794	5.62706	10.8479	8.26284	7.84087	5.64266	4.0419	8.15381	7.82519	12.594	9.70202	6.28818	12.9674	6.34016	9.48859	12.6109	3.62709	6.81732	9.12566	9.5278	7.33734	7.0711	8.5919	9.99747	6.504	13.1662	6.98784	4.98283	6.33762	10.5099	5.94841	13.8978	12.019	2.89682	5.93583	8.98071	4.19792
384	control	European American	8.61828	6.66641	8.61925	9.53779	7.01364	11.3993	11.566	7.38036	8.94618	4.03088	12.103	5.75989	10.3185	9.11028	11.6711	5.70561	3.96119	9.08933	7.90016	11.8395	10.5835	4.70584	11.1517	6.53111	10.0508	12.6648	3.54856	6.75416	9.32438	9.60792	7.2384	5.7354	9.07737	9.29276	6.45234	13.3523	7.20659	5.08078	6.98844	11.4101	5.69734	7.69336	11.7655	4.4917	5.53596	9.00962	4.91038
385	case	European American	7.41211	6.4814	8.42291	9.49783	6.44029	10.7252	10.9977	5.91436	9.06884	4.32021	11.6369	5.31295	11.3114	8.52041	7.92205	5.00254	3.85094	8.99949	7.73886	11.7583	9.72423	5.43551	9.9327	6.1017	9.73473	12.5026	3.68877	6.15065	6.70053	9.2903	7.59269	5.71718	8.52296	9.48694	5.8131	12.452	7.19983	4.54944	7.15508	11.3668	6.12519	6.45332	11.8231	4.01389	5.59537	9.07871	5.27464
387	case	African	15.0193	7.5422	8.79841	6.7452	7.03441	12.5807	11.3323	6.16278	9.12672	11.1077	13.8862	6.21574	10.4771	7.94486	9.24832	4.29305	5.01168	9.10079	8.1606	13.3102	9.90644	8.87213	13.0158	8.91522	9.63708	12.7418	4.58086	6.97126	9.3521	13.6873	7.68362	5.66083	9.5636	10.2904	6.96022	11.9721	6.73066	4.91185	7.30007	11.6493	6.60838	14.1183	12.4866	4.10879	5.40579	9.25774	4.98426
388	control	African	8.24993	6.51538	8.36683	9.06588	6.44834	10.1558	11.0897	6.60451	8.82895	4.4582	11.5448	6.25959	12.0859	9.09913	11.0694	6.67261	3.69439	8.67095	7.69719	11.8534	9.80755	8.49259	12.2319	6.65658	10.1043	12.565	3.62903	7.14436	10.8522	9.48063	7.46383	5.89076	9.05796	9.00366	6.82114	13.2621	6.90284	5.13485	6.80704	11.1783	5.93736	7.9341	12.1414	2.89658	5.61443	8.87041	3.92097
389	case	African	11.3548	6.56536	9.56947	5.1918	6.96658	11.7589	10.45	5.98643	9.08411	8.64342	11.5935	5.92503	10.0095	7.04841	9.28468	4.12319	3.40431	9.26101	7.33787	12.4145	10.2809	5.79428	12.0281	8.27752	8.69669	12.4129	3.78747	6.30722	8.40843	10.202	6.53658	6.2557	8.95834	10.6667	6.24539	10.6944	7.08814	4.75041	6.80756	12.4294	5.87751	9.1009	12.4582	3.44658	5.54106	8.66054	5.10017
390	case	European American	7.96686	8.23658	8.31206	9.75703	6.44487	10.5371	10.4614	6.72302	10.4268	3.94455	12.8676	5.56523	11.1729	8.41311	8.85779	5.27688	3.8933	9.49719	7.70293	12.8749	9.78675	4.83382	10.8308	5.92106	10.0995	12.3497	4.28875	6.47585	9.24258	8.37528	7.75612	6.52312	9.38539	9.7051	6.03098	13.0441	8.27708	5.2451	7.93305	12.2378	5.99689	7.40262	12.3552	4.89052	6.00476	9.48996	6.45606
391	control	European American	7.41496	6.53215	8.73505	9.58162	6.44044	10.8085	11.5935	6.43311	8.88155	4.28954	12.5022	5.63107	10.2479	8.65917	7.99804	4.70363	3.30375	8.5166	7.73964	11.7172	10.1822	4.94546	10.9053	6.92646	9.91605	12.532	3.58676	6.39195	9.37661	8.36411	7.38005	5.44773	8.69005	9.91473	6.06421	12.2289	6.86715	4.13669	6.40817	11.1477	5.42397	6.21252	11.8553	3.85168	5.48615	9.07025	4.81699
392	control	African American	8.99696	5.85563	8.38739	9.83697	6.91123	11.8334	11.5276	6.53972	8.46987	3.77491	11.332	4.73836	11.8347	8.96393	7.93827	5.20652	3.62872	8.50666	7.5527	11.9313	9.79524	5.44281	12.6903	7.18777	10.1314	12.5434	3.52126	6.96103	10.2072	8.54595	7.2767	5.28231	8.08847	9.09112	6.23978	12.7933	6.73281	3.93567	6.15861	10.6459	5.69398	7.25399	11.9149	3.70674	5.36961	8.73621	3.76991
394	case	African American	10.4035	6.31922	8.6398	8.41698	6.08074	10.6898	10.8037	6.66184	8.59792	10.098	12.5298	5.55431	8.54171	8.85702	8.30436	5.27772	3.67055	8.98458	7.82279	11.3297	10.0681	6.39823	11.6009	6.63161	9.37809	12.5945	3.30522	6.48783	7.83384	8.16259	7.56384	5.5884	8.43352	9.33725	6.31374	13.1868	7.21393	3.92148	5.84881	11.7004	5.32273	6.69049	11.6527	3.23784	5.50664	8.57583	4.57195
395	control	African	10.6844	6.10425	8.68023	10.2785	6.65446	12.3723	11.3649	6.75436	8.46243	3.99692	10.7167	5.81889	10.0105	8.16784	10.9776	6.12416	4.12713	8.41726	7.39932	12.47	9.99553	6.72582	11.6435	6.4751	9.33217	12.5576	3.79043	5.90041	8.94567	10.0019	7.31217	6.00951	8.74736	9.06612	6.47907	9.9528	7.3225	5.09772	6.81154	9.7018	5.61532	8.70076	12.1837	2.77558	5.89366	8.83276	4.08854
396	control	African American	11.4458	6.5911	9.38231	10.5333	7.5925	12.4198	11.4799	7.18186	9.45635	5.61057	11.3292	6.3467	10.6491	9.16602	7.88444	5.36686	3.77131	9.04886	8.4675	12.778	9.54825	7.41459	12.8233	8.49894	10.1961	12.5756	4.02077	6.50832	10.0422	10.3769	7.64145	5.67804	8.9752	10.6013	6.58047	12.7456	7.37352	4.79198	7.39614	11.4871	6.35209	10.0315	12.4259	3.58645	5.74665	9.43905	4.9586
397	control	African American	14.8053	6.85829	8.82277	9.55942	7.09861	12.273	11.1051	5.80638	10.0293	5.60205	12.2728	5.55662	11.1353	8.62321	9.14275	5.39108	4.31466	8.94884	7.83462	12.5467	10.0964	6.54107	12.093	7.87451	9.90083	12.5927	4.13902	6.54719	9.50298	10.3375	7.84365	5.9808	9.54458	9.9442	7.01307	13.0653	7.22603	5.15102	7.08961	11.5747	5.44677	9.14704	12.529	4.04846	5.90231	9.32831	5.02235
398	control	African American	13.1315	7.33858	8.78943	8.37154	7.05047	12.5328	11.0943	5.58171	9.38945	3.34215	13.0717	6.03101	9.92745	9.32264	7.8564	5.2503	4.77851	9.7168	7.95138	12.5057	10.9726	7.08481	11.4411	7.5201	10.1666	12.6532	5.00315	7.69027	10.5433	11.3187	7.75257	6.09875	9.04001	8.8765	6.79624	12.574	8.01552	4.45885	6.60654	11.8369	6.01676	8.66706	11.7115	4.59434	5.66027	9.64792	5.51309
399	case	European American	9.50299	6.41493	8.3812	10.3171	7.10271	11.8096	11.2103	7.18632	9.25735	3.77854	12.3166	5.07864	10.8414	8.82178	9.04408	5.20992	3.55466	8.71229	7.91639	12.2737	9.71187	5.46884	11.4539	6.82343	9.91153	12.3177	3.86458	6.93684	8.46971	9.54709	7.4932	5.69145	8.86374	8.90554	6.33113	13.3889	7.33998	3.89569	6.69585	10.8626	5.17637	8.03883	11.9083	4.49436	5.36504	9.27915	4.60172
400	case	European American	7.78853	8.03565	8.52451	9.30271	6.95817	10.7544	11.0435	6.21608	9.76	3.71646	12.118	6.32852	9.8131	8.61782	10.0457	6.66528	3.63723	9.32818	7.25066	12.504	10.1535	6.54962	10.5207	6.04465	10.1968	12.539	4.79751	6.76312	8.65132	8.44202	7.74197	6.08775	9.70002	9.40649	6.51095	13.0238	7.48596	4.98557	7.52181	10.8747	6.11028	7.0912	12.5075	4.42395	6.46536	9.52224	5.88181
401	case	African	14.7102	6.86957	10.2014	8.13553	6.79528	12.3477	10.9577	5.49212	9.52978	4.86232	10.8905	5.3535	10.7483	7.94968	9.10651	5.05177	3.6453	9.40788	7.37811	12.4892	9.61927	8.79604	12.496	8.61119	9.30736	12.4925	4.07742	6.43929	8.1638	9.73704	7.66675	7.23021	9.83621	10.1182	6.26739	9.58932	7.32934	3.71596	7.07322	10.5599	6.36829	12.044	12.4265	4.36729	5.24076	9.07906	4.4416
403	control	European American	8.69901	6.84052	8.91806	8.64934	7.23809	10.5667	10.8015	5.98862	9.1815	7.39732	12.152	6.01273	9.95127	8.831	8.50309	5.31296	4.24416	9.16167	7.84676	11.9069	10.4284	5.7302	10.382	7.16925	9.71623	12.5201	3.87756	7.20519	8.5187	8.85092	7.56568	5.57196	8.93193	9.73574	6.54803	13.3862	6.83416	4.54552	6.94378	10.5791	5.69769	7.0638	12.2345	4.06052	5.77397	9.19344	5.38831
404	case	African American	8.57002	7.98296	8.51088	10.064	7.20053	11.327	11.5041	7.64348	10.5603	4.6107	13.0778	6.51022	9.90114	9.8555	11.1	5.95866	3.74244	9.63426	7.72562	13.3862	10.0854	6.48161	11.9548	6.61609	10.1812	12.5555	3.70541	7.3306	9.66225	9.3735	8.06603	7.02411	9.64822	9.89156	6.75448	13.1998	8.72418	5.83225	8.30703	11.8977	5.8669	8.12458	12.5589	5.34051	6.67686	9.67199	5.72406
405	control	African	14.1591	6.72938	8.81808	10.0913	8.00054	12.9092	11.5313	6.49484	8.75772	7.69018	11.5643	6.5984	11.3884	8.95437	8.77205	5.76805	3.64055	9.15944	7.72301	12.7594	8.97377	8.26069	13.2314	8.77087	10.1449	12.7439	4.3997	7.47691	9.08355	11.8933	7.86347	5.28922	9.15935	9.41007	6.9373	12.4399	7.21336	5.12409	6.96606	11.2758	6.63657	12.6964	12.2979	3.18263	5.64684	9.08076	4.5412
406	case	African	8.86163	6.38194	8.79455	7.39628	7.13501	9.99314	11.0302	6.3106	8.98212	3.57834	11.454	6.37807	11.59	8.04676	9.21958	5.93358	3.93569	8.73585	7.81081	11.8742	9.05985	6.51151	12.1804	5.72008	9.50093	12.514	3.75263	6.81212	9.11211	8.35917	7.60698	5.54707	9.26691	8.79339	6.58402	12.355	7.83433	5.59681	6.47757	11.2956	6.03271	6.4375	12.4002	3.51861	5.95501	9.17723	4.61525
407	case	African	14.8814	6.74882	8.62397	9.48402	7.34022	12.6668	11.4177	5.75068	9.10715	10.3112	10.744	6.03344	9.79848	8.3313	9.55323	6.3942	4.15357	9.25259	7.66048	12.7267	9.97618	6.0101	12.7986	8.40512	9.88161	12.6212	4.24483	6.60536	9.21506	13.2599	7.7694	5.60271	9.26255	10.1849	6.37346	12.1944	7.36695	4.94416	6.82308	11.5368	5.78469	14.0409	12.4418	3.24711	5.68587	9.25436	4.8434
408	case	African American	15.2528	6.28963	8.86002	10.1144	6.5256	12.4788	11.4461	5.87833	8.7564	5.70015	11.9965	5.12908	9.90359	8.85598	7.57209	4.40757	3.6538	9.03391	7.84693	12.8001	10.4702	5.6399	12.4289	7.95938	9.85497	12.597	3.34644	7.16188	9.41881	9.58637	7.71079	5.71517	8.50645	9.46301	6.47049	13.1712	6.78458	5.4299	6.96176	10.9276	5.59499	9.91285	12.0601	3.75046	5.73022	8.86598	3.99208
409	control	African	7.73932	6.10987	8.77674	10.0547	7.02068	12.3188	11.4166	6.5489	8.77196	3.85508	10.8852	5.3265	11.0587	8.61347	7.77357	5.0548	3.4603	8.70329	8.34274	12.0809	9.9707	6.39128	12.6478	6.39177	9.68124	12.6829	2.99125	6.61346	9.05634	9.37459	7.38607	5.60415	9.00855	8.77536	5.8355	13.1512	7.3072	4.77214	6.4922	9.57864	5.39733	7.20926	11.2877	3.59722	5.57477	9.2686	4.1994
410	case	African American	8.59065	7.52866	8.44714	9.64383	6.45246	11.6485	10.966	5.30958	9.5713	4.077	11.6068	5.48864	10.0359	8.29974	7.77053	5.84371	3.30276	8.82753	7.83479	12.4909	9.74558	5.53975	12.0006	6.66827	9.46008	12.5679	4.1376	6.01338	8.84067	8.86517	7.88345	6.19911	9.75089	9.17147	6.26058	12.7016	7.84986	4.54347	7.97723	11.418	6.44892	13.0231	12.5674	3.82647	6.03395	9.3883	5.6075
411	control	African American	8.8032	6.52207	8.82779	9.83304	6.46261	11.6817	11.3681	5.54718	8.70028	3.77721	10.6796	5.24896	10.1115	8.79111	8.15914	5.05709	2.86242	8.54631	7.66308	11.7698	8.33616	5.39526	12.1702	6.57675	9.57293	12.6884	3.59961	6.56452	8.85114	9.17204	7.55392	5.4907	8.67864	8.9445	6.24191	11.8294	6.22454	4.39834	7.15521	10.7726	5.84031	8.36085	11.8077	3.14752	5.62041	8.69421	4.43946
412	case	African	9.49524	5.43622	10.7336	9.18345	7.43784	12.9096	11.1654	6.6219	8.4759	3.84812	10.2103	4.64026	9.49372	6.76278	6.88022	5.32245	1.83561	8.91771	7.85394	11.9985	8.77869	3.38555	11.4817	7.12975	6.62544	11.6378	3.0578	4.40495	9.12239	8.56148	4.53121	6.91299	8.50913	9.82282	5.56365	9.3121	5.18185	4.22887	5.9145	9.04134	5.31583	6.7266	9.45075	2.10729	4.58868	8.41232	3.27103
414	control	European American	7.53781	6.07381	8.39979	9.68112	6.45386	10.8614	11.4485	7.16338	8.35918	3.1385	12.0002	5.4588	10.3524	8.3983	6.70227	5.07625	2.59725	8.11232	7.73441	11.2982	9.58497	5.61431	10.313	6.64039	10.0566	12.4989	4.1644	6.46385	9.63743	8.72806	6.97289	4.9724	8.02642	8.73269	5.98081	12.3865	6.69868	3.82309	5.87189	11.1549	5.44923	6.03046	11.7636	2.81629	5.37575	8.82279	4.08533
415	case	European American	7.47432	6.50966	8.54465	10.0599	6.63066	10.856	11.4954	7.4354	8.73728	3.6815	11.4254	5.11951	10.2141	8.57287	7.8238	4.57562	2.61286	8.78367	7.72436	11.807	9.48318	3.70806	10.6605	6.91833	9.94721	12.4034	4.00498	7.39173	9.23886	8.32963	7.27818	5.38119	8.39081	9.18348	5.54516	12.5594	7.23105	4.41848	6.31939	11.355	5.05843	6.42787	11.2838	3.97842	5.48184	9.28028	4.62922
416	case	European American	8.6953	6.42642	8.97102	9.94172	6.69465	11.8385	11.3458	7.6258	8.60059	4.4924	12.5295	4.94121	10.0289	8.99368	8.3412	4.59691	4.11995	9.14191	8.14569	12.1723	10.2822	4.56028	10.2314	6.65129	9.98487	12.5936	3.78757	7.11685	8.43285	9.50389	7.46777	5.72938	8.3745	9.62394	5.68461	13.4066	6.81193	4.27479	6.5529	11.0707	5.35518	7.80743	11.9126	4.15927	5.67349	9.10164	4.70241
417	control	European American	9.96256	7.05806	8.65984	10.2293	6.48423	12.0422	11.5456	6.62528	9.74735	4.61266	12.6726	5.21685	12.1808	8.92259	8.87549	4.86146	3.1578	9.19075	7.79798	12.3611	9.81337	5.42074	11.1657	7.59987	9.95201	12.5615	3.75463	6.61543	9.50094	9.18596	7.88064	5.74497	9.41075	9.91047	6.3549	12.8065	7.08798	4.82333	7.24915	11.772	5.52519	8.57157	12.3165	4.26963	5.87589	9.19117	5.21379
418	case	African American	10.2096	7.40201	8.69968	9.65118	6.76901	11.7193	10.7075	5.8873	9.86615	4.24742	11.6467	5.94191	10.9604	8.61499	10.0497	5.65384	3.62341	9.0918	7.69289	12.3785	9.55153	7.02608	12.1744	7.16355	9.78726	12.5149	4.54685	6.35169	9.78869	8.99887	7.8091	6.3344	9.68341	9.55102	6.70561	12.564	7.24836	5.10092	7.40578	11.3608	6.2902	8.17184	12.4653	3.94274	6.23082	9.40721	5.42026
419	case	European American	8.05068	6.71217	8.59594	9.27689	6.55934	11.4342	11.3781	6.51058	9.09154	3.85202	11.8331	4.69624	10.2769	8.74834	9.56617	5.07199	3.36822	8.81804	7.55055	11.9693	9.44142	5.11439	10.2602	5.77228	9.90701	12.5263	4.23744	7.03843	9.21921	12.5299	7.69076	5.46699	8.90123	9.31993	6.2056	12.9248	6.94401	4.4296	7.11263	11.0063	5.6726	8.83127	12.3204	3.93088	6.02911	9.16617	5.06872
420	case	European American	9.61766	6.42059	8.26162	10.295	6.60357	12.5124	11.4041	6.45019	8.81815	3.75065	11.6647	4.78041	10.2432	8.5197	7.65279	5.03425	4.11177	8.8287	7.47598	12.2159	9.29964	5.84077	10.5644	7.79608	10.1796	12.4741	3.72067	6.53567	9.13759	8.97379	7.59644	5.11402	7.9036	9.51745	6.01911	12.7648	6.62325	4.65034	7.18136	11.2518	5.35747	7.26202	12.1924	3.61203	5.59369	8.93967	4.31794
421	case	African	12.345	7.59952	8.94341	7.54893	7.45423	12.2824	11.3797	6.53608	9.91064	6.80111	11.5671	6.94746	10.2118	8.5082	10.4267	5.78915	3.42003	9.53805	7.59187	12.9249	10.4719	7.84258	12.7938	7.6191	9.4631	12.6707	4.484	6.59988	8.75353	10.9445	7.90807	6.5692	9.97214	9.75059	6.47668	11.9011	8.11836	5.36271	7.57495	10.4161	6.44829	12.0655	12.4857	4.04421	5.70701	9.47944	5.12397
423	case	European American	7.99215	6.07604	8.83715	10.2384	6.52052	12.0774	11.3318	6.89602	9.13457	3.71662	12.0995	4.81826	9.33473	8.56361	7.23915	4.44928	3.72954	8.88969	7.85605	12.0708	10.5738	5.47809	10.4668	7.40467	10.3523	12.6032	3.97473	6.38226	8.72879	9.29898	7.48305	5.1273	8.17079	9.15938	5.81473	13.2694	7.42478	5.31098	6.44978	11.3718	5.12531	7.17557	11.7053	3.55344	5.73339	9.27805	5.68148
424	control	African American	7.47909	5.60962	8.84315	8.25159	6.19655	9.26129	11.2076	6.68287	8.78397	3.93845	12.3435	4.78378	10.0137	8.7516	6.96392	5.75125	3.70385	8.15779	7.78086	11.5081	8.24905	7.02612	10.6911	5.24422	9.89076	12.5351	3.34883	6.64087	8.58037	8.44584	7.40287	5.46189	8.5194	8.88074	5.85072	12.3845	7.27064	4.26325	6.32817	10.0122	5.48615	6.11158	11.6925	3.19698	5.55925	8.84514	4.24285
425	control	African	12.7806	7.04747	8.69054	9.3174	7.40541	12.2383	11.4356	5.41217	9.28341	5.32056	11.3467	7.29433	10.9879	8.79477	9.32079	5.29094	4.19189	9.2234	7.77479	12.4595	10.0445	6.29305	11.6636	6.72578	9.87745	12.5831	3.73606	6.89681	9.15465	9.7891	7.84876	6.10995	9.2847	9.23827	6.40459	13.0803	7.40544	5.4672	7.34877	10.8059	5.98843	10.3257	12.4343	3.6126	5.9539	9.40577	4.74616
426	case	European American	8.54794	5.78073	8.24732	6.21498	6.21929	7.93878	10.7873	6.75905	8.37195	3.8867	11.6168	5.04549	10.3111	8.5963	6.59879	5.08389	5.12686	9.41076	7.47977	11.3085	9.76928	6.47326	10.8593	6.60893	9.70801	12.5412	3.55212	6.19764	8.09664	8.14931	7.09186	5.05771	8.28081	9.34266	5.42543	12.4101	6.92486	3.85929	5.78	11.0333	5.23895	5.85864	11.7053	3.37424	5.38899	8.90883	4.1326
428	control	European American	7.29343	6.46055	8.54507	10.2929	6.93761	11.7068	11.2657	7.12528	9.06805	3.65545	11.9019	5.35274	9.58593	8.69386	7.17253	5.47702	3.61281	8.84272	7.62745	11.7161	9.34024	4.49342	9.94768	7.02119	9.9137	12.5676	3.68329	7.13137	9.16593	9.43133	7.15331	5.58536	8.94527	9.29019	6.30183	12.5477	7.28205	3.57629	6.84964	10.4128	5.38668	6.85521	11.9412	3.47462	5.73414	9.24478	4.53667
430	control	African	9.75582	6.48694	8.18803	10.1934	6.62484	12.6452	11.4405	6.31626	8.78457	4.55581	10.9406	5.26774	10.052	8.85664	7.53059	4.98889	3.87747	8.85828	7.67655	12.3292	10.1673	6.29962	12.6137	7.27151	9.94792	12.619	3.88812	6.80934	9.33538	9.82273	7.42966	5.76235	9.0227	9.20922	6.57676	12.3092	6.79892	4.15042	6.90239	10.4832	5.77377	8.18822	12.3691	3.12629	5.79143	8.95134	4.6662
431	case	African American	7.47171	6.13552	8.5894	10.3759	6.25999	11.504	11.3191	7.11509	8.66529	5.52271	11.3063	5.60104	11.8961	8.95738	8.62795	3.67712	2.77098	9.14483	7.53332	11.3625	8.74843	6.47081	12.6694	5.95032	9.42709	12.5932	3.48203	7.14884	8.88589	10.0733	7.35252	5.40178	8.67658	9.61115	6.44948	12.026	7.00088	4.53078	6.50275	11.2057	4.77267	14.0583	11.4848	3.49736	5.18252	8.57293	4.24115
434	control	African American	7.91884	6.3	8.7885	9.66199	6.38867	11.7279	11.1065	6.26004	8.91428	3.80887	12.5181	4.20685	11.1518	8.90102	7.84285	5.61571	3.26084	8.74006	8.04415	11.5927	9.65049	3.4764	11.5274	6.89276	9.88334	12.5986	3.61416	6.52415	9.19756	9.36634	7.50822	5.58941	8.41548	9.7184	5.77468	12.901	7.76876	4.57463	7.08644	11.7276	5.33867	7.90685	12.2003	3.74521	5.51857	9.12773	4.4731
435	case	African	12.022	7.03025	8.78098	8.73827	7.12435	11.1381	10.9661	6.90576	8.99999	3.75709	11.382	7.15909	11.2407	8.58578	9.29097	5.77416	4.26105	8.60981	7.75869	11.5838	10.0993	6.70148	13.2431	6.72791	9.97845	12.6457	4.48666	7.30893	9.57514	8.92649	7.50852	5.58957	8.59086	9.36138	6.67537	12.6738	7.7686	5.32495	7.08844	10.6533	6.12111	6.70237	12.4059	3.60696	5.82046	9.20081	4.5894
436	case	African	14.6561	6.2253	10.1888	9.15736	5.37425	12.7071	10.8081	2.40407	8.34278	6.16453	10.691	3.53276	5.60711	6.84224	6.31544	4.15686	0.4139	9.14701	6.58126	12.1966	5.05897	2.05211	5.91641	6.72007	5.19588	11.4544	3.46298	3.67233	7.18683	7.70068	4.25767	6.16887	8.34436	9.27075	4.89687	7.73308	4.42659	4.75881	6.25398	8.33165	4.5841	5.37965	9.6667	1.80378	2.1666	8.21894	3.71186
437	case	African	8.18124	6.80019	8.77854	7.48712	7.37217	10.0954	10.7691	6.88897	8.70193	5.1368	11.4869	6.58869	10.6446	9.31844	11.6151	5.01157	3.77032	9.16613	7.75233	12.1262	11.0209	9.18614	11.9977	5.5988	9.77357	12.6133	4.91522	7.37684	10.448	8.34248	7.42157	5.83742	9.8684	8.90192	8.62059	13.2868	7.23594	6.16741	6.62649	11.8406	6.01937	7.11166	12.3726	3.67771	5.85371	8.85564	4.15478
438	control	African	12.2867	6.7886	8.39826	9.94848	7.25214	12.0373	11.3075	6.39126	9.24616	4.61594	10.9121	6.22155	10.0915	8.41548	9.15261	6.06859	3.63059	9.16243	7.47584	12.3557	9.51588	6.19512	12.8017	6.83949	9.80756	12.5386	3.96737	6.3352	8.84609	10.9628	7.57374	5.93008	9.47734	8.9576	5.91831	12.3285	6.89771	4.44572	7.033	11.3288	5.84563	10.0052	11.6687	3.15527	5.66251	9.26836	4.6882
439	case	African	8.17423	6.65767	9.95785	5.05061	6.57105	11.9069	10.741	5.7828	8.67858	4.31295	10.3729	6.2026	9.79873	7.25845	8.48794	4.56562	3.13112	8.75259	7.70807	11.8701	8.39163	5.43597	12.368	7.38658	9.305	12.5642	3.61813	6.37247	8.23544	8.61731	6.34844	5.39249	8.82117	9.63605	5.46558	10.5327	6.33132	5.06248	6.17269	10.8094	5.74037	7.2623	12.0534	2.76507	5.23115	8.5948	3.86757
440	control	African	12.1499	6.30166	8.11995	10.3049	6.53423	12.2385	11.2588	6.3649	8.55936	5.02883	11.1586	5.69681	9.03006	8.46537	9.07646	4.82185	4.06525	8.8094	7.43492	12.165	8.24176	7.38393	12.1811	6.84244	9.45479	12.4276	3.51965	6.56942	9.38222	9.92053	7.44978	5.39343	8.51139	9.1318	6.42028	11.7672	6.83409	4.40336	6.65208	10.91	5.49354	9.0919	12.2283	3.35499	5.54842	8.66489	3.65589
441	case	European American	7.37071	6.4991	8.8865	8.94647	6.71175	10.8634	11.1839	6.97428	9.19912	3.78247	12.5983	4.91225	10.186	7.81856	8.10827	6.02638	3.00287	8.82218	7.72124	11.8644	9.64245	4.37871	10.6245	5.97581	9.34002	12.5842	3.43591	6.77001	8.85688	9.48575	7.31659	5.34122	8.67319	9.28301	5.64396	13.0314	6.98859	4.48768	6.88743	10.6006	5.34032	7.55487	11.8986	3.85723	5.54111	9.43359	4.54599
442	case	African	11.0884	7.3192	8.66084	9.16588	6.84528	11.5629	11.1907	6.55774	9.13997	4.95331	11.0189	6.10669	10.0662	8.77797	8.75715	6.00553	4.11485	9.11718	7.62032	12.0412	9.81328	9.35711	12.8535	8.29564	9.80377	12.6501	4.57907	6.90323	8.86949	10.4432	7.80803	6.05432	9.2109	9.97491	7.04552	11.7056	7.02584	5.07324	7.12072	11.5247	6.01939	14.1872	12.4603	3.9317	5.86189	9.13504	4.80464
443	control	African	10.4336	6.55899	8.82111	10.3641	7.52829	12.7135	11.5209	7.06175	8.79002	4.27971	10.9539	6.32109	11.3355	8.504	8.10518	5.55307	3.51019	8.65011	7.70847	11.9395	10.3336	7.45761	12.4199	8.528	10.1094	12.6931	3.7776	6.35552	9.06391	10.1527	7.69045	5.76122	8.65211	9.15041	7.31307	10.5936	7.47204	5.24353	6.51754	10.6362	5.34391	9.12481	12.2382	2.88583	5.62023	8.8212	4.15419
444	case	African	10.728	6.48124	10.677	9.37006	6.89736	12.8588	11.0419	7.1732	8.40423	5.64874	9.25417	4.69805	8.07471	6.54071	10.482	5.10872	2.54184	9.19239	7.43158	12.594	9.84557	5.76829	11.9557	7.20956	6.43999	11.7299	3.6517	4.60249	7.04762	8.20255	6.60636	6.97855	9.28385	9.76608	5.72872	8.81907	5.44275	4.26917	6.35047	10.7664	5.68305	6.96075	11.8156	3.19508	5.47356	8.43046	4.24229
445	case	African	9.28684	7.1892	10.9128	8.57824	6.95752	12.9588	11.0861	7.89161	9.71149	7.71422	10.0035	5.28274	10.1056	7.78962	9.22717	4.57252	4.35754	9.33026	7.38986	12.9811	9.46264	6.02555	12.1645	8.0388	8.47903	12.0411	3.93329	5.18315	8.00184	7.74724	7.41702	6.91863	9.33977	10.8362	6.60675	9.45141	8.331	5.64231	7.47589	11.2509	5.56405	8.47095	12.1976	3.66968	5.87544	8.91135	4.82504
446	case	African	14.144	5.82604	10.6976	5.82293	7.27055	13.0291	11.1391	6.08573	8.63786	9.07763	14.4849	4.60996	9.3322	7.00158	7.97427	5.0938	2.85058	9.20255	7.61714	12.4118	9.60727	5.96351	12.2927	8.10331	7.52937	12.079	3.52137	3.80719	8.31062	11.1717	6.65043	6.70608	8.91355	9.66049	6.60214	9.19169	6.18737	5.27078	6.35192	10.3893	5.90084	11.939	11.484	3.02891	5.59219	8.89002	4.24953
447	case	African	13.9068	8.38053	9.52239	7.98309	7.92311	12.0862	10.8779	6.23354	10.0441	14.6293	14.6714	7.29356	11.7533	8.7916	10.0457	5.68929	4.51877	9.52172	7.73645	12.9764	10.3712	7.37196	13.1333	9.64028	10.662	12.5627	5.71792	7.68616	10.356	14.1875	7.91836	6.52166	10.0528	10.9444	7.26111	11.3195	8.14653	5.50738	7.78284	11.5033	6.04304	14.0081	12.5137	4.65509	5.95877	9.59687	6.24386
448	case	European American	10.2319	5.89584	8.66363	10.4886	6.29933	12.3057	11.5165	7.8002	8.8344	4.18452	12.7607	5.21475	10.5288	8.57784	7.72724	4.72052	3.96749	8.81593	7.86785	12.3364	9.46955	3.98701	11.6231	7.85082	10.0327	12.1875	3.37843	6.26618	8.78029	9.18643	7.0635	5.47443	8.2246	10.4186	6.0821	12.7056	6.90213	3.61724	6.78135	11.8168	5.2678	7.44612	11.9061	4.01163	5.47752	8.87328	4.40675
449	case	African	10.2937	7.80822	10.1889	8.15906	8.1529	11.5262	10.4749	5.87562	10.7706	6.62575	10.9747	6.58865	10.2528	7.51216	11.4182	5.35732	4.2644	9.78737	7.70253	13.0604	10.5821	9.8839	12.055	7.60622	9.58994	12.5621	4.64753	6.2439	8.87464	9.81143	8.16983	7.49667	10.6074	10.1013	7.9758	10.0133	7.79696	5.77056	8.12071	11.6852	7.40906	9.83815	12.579	4.49845	5.68099	9.73323	5.85444
450	case	African	13.973	7.00251	9.1153	8.4475	7.19034	12.7338	11.5335	6.10072	9.07139	14.094	14.6422	5.71965	11.2107	8.40265	9.55686	4.88944	4.54674	9.62358	7.82501	12.9951	10.3663	6.22797	13.3999	9.80605	10.0851	12.6739	4.89418	6.35074	10.0627	13.684	8.13593	5.89512	9.07507	10.3337	6.58362	10.3724	7.13219	5.42248	7.78833	11.2176	5.60925	14.4424	12.273	3.79859	5.86926	9.0101	4.93666
451	control	African American	7.86068	6.47901	8.86842	9.72765	6.14244	11.7726	11.1886	5.61995	9.1516	3.50375	12.0582	5.81376	10.6524	8.33053	8.40142	5.10369	3.60515	8.45336	7.48462	12.0141	9.11547	6.0509	10.8672	6.47517	9.66876	12.5475	3.70443	5.72676	8.90467	10.9351	7.59815	5.16362	8.85383	8.9347	5.74312	12.5592	7.14976	4.41469	6.87885	10.8726	5.33341	10.1834	12.1981	3.14089	5.72639	8.9957	4.6327
453	control	African American	9.03947	5.78679	8.46021	9.24361	6.30422	11.7021	11.176	6.01234	8.06276	3.75872	10.7286	4.83137	9.29859	8.53871	6.84597	5.02416	5.11817	9.10578	7.7331	11.3005	9.24316	6.63091	12.15	7.42848	9.25975	12.2509	3.45439	6.33195	9.10123	9.42509	7.20032	4.76091	8.22357	9.26426	6.10382	13.0162	6.24996	4.20706	6.54011	9.71077	5.32067	8.36459	11.6892	3.49786	5.48765	8.46358	4.02319
455	control	African American	11.1041	5.8695	8.34585	9.79289	6.26266	12.1397	11.3533	5.7814	8.49598	3.43364	10.9798	5.31179	9.73012	8.44471	7.25377	5.56924	4.69899	9.08054	7.47161	11.9569	9.35886	6.23293	11.613	6.78449	9.39104	12.6275	3.54802	5.84994	8.80499	8.6844	7.56621	5.60525	8.30258	8.68411	6.02269	12.6168	6.54129	3.90085	6.19569	10.5394	5.43478	8.27556	12.0185	3.14939	5.51299	8.96809	3.9938
456	control	African American	8.00314	5.86828	8.74462	8.66141	6.1193	10.0987	10.9464	6.42719	8.90577	3.63253	13.0305	4.58788	10.7701	8.4164	8.16165	6.47403	3.37904	7.90847	7.54289	11.331	8.79474	4.34464	10.7794	5.10185	9.88412	12.4483	3.17676	6.22491	8.86307	8.98039	7.18104	5.20315	9.0223	9.24673	5.91122	12.8472	7.41172	4.44787	6.61601	10.6381	5.25871	6.69891	12.2589	3.88607	5.5264	9.0887	4.85036
457	case	African	9.42526	6.80898	10.8018	7.00126	6.69305	12.5483	10.9072	6.04443	8.79926	3.43317	9.95119	4.47973	8.16907	6.80129	7.21403	5.81533	2.24255	9.18441	7.53816	12.1908	8.85598	7.84864	9.70767	6.27657	5.89576	11.6598	3.58625	4.93863	7.31522	7.58051	6.06282	5.84169	8.66114	8.97792	6.42975	9.58083	6.15384	3.81497	6.66187	9.78004	5.64947	5.50532	11.7289	2.77711	5.30344	8.42237	4.90917
458	control	European American	10.0527	7.61079	8.45028	9.12248	6.33727	11.1965	10.7543	5.81406	10.2729	4.14468	13.2534	4.89539	11.0159	9.09767	9.54557	5.98009	3.38483	9.67972	7.8328	12.4739	10.8041	4.75674	10.6842	7.37975	9.44586	12.425	3.79724	6.97141	9.09396	9.09898	7.94823	6.58174	9.83438	9.54458	5.81792	12.9988	8.08492	4.57859	8.00556	12.1672	5.73506	8.18546	12.409	5.31622	6.21254	9.68665	5.58824
459	control	European American	9.41298	6.39181	8.51593	10.0365	6.3642	11.7207	11.3595	5.9957	8.77275	2.80271	12.5114	4.79709	9.74408	8.53925	7.10782	4.89457	5.88188	10.4899	7.59411	12.0398	10.0954	6.09107	10.8052	7.08033	10.0261	12.5029	2.9932	6.31444	8.41796	8.76416	7.69385	5.55275	8.2509	9.30706	5.93387	12.9473	7.01722	3.59263	6.9269	10.624	5.00658	6.94051	11.67	3.85521	5.52043	9.19259	5.43062
460	case	African	10.3886	7.07677	9.13657	5.0561	6.76553	11.8752	10.4418	5.93592	9.78218	6.35481	11.4395	6.4704	9.4445	7.4667	9.82865	5.28094	3.49409	9.04538	7.46524	12.4236	9.3938	5.61547	11.5938	6.59598	9.47407	12.3855	4.11091	6.57995	8.26863	8.53662	6.7251	6.12899	9.81019	9.61904	5.79375	12.2846	8.81139	5.00741	7.77968	11.2809	5.88974	7.02156	12.504	3.94067	5.75709	9.67488	5.0011
461	control	European American	7.71044	6.90224	8.44735	9.83742	6.84157	11.1055	11.5625	7.26754	9.13137	3.77478	12.2657	6.08551	9.29884	8.63352	9.10587	5.49786	3.48824	8.87903	7.72983	11.9101	9.30948	6.31453	10.4557	6.38956	10.0255	12.458	3.48285	7.02872	8.97011	8.87431	7.65791	5.48238	8.23651	9.44755	6.71683	12.9447	6.76862	4.85401	7.21229	12.032	5.44195	7.27931	12.1777	3.40139	5.89993	9.13323	4.34206
462	case	European American	9.77158	6.77905	8.43557	10.1916	6.6269	12.3066	11.4905	8.0062	9.3591	3.94795	12.436	4.8191	10.36	8.66014	8.16288	5.27264	2.1164	9.18523	7.68931	12.1235	8.69522	5.07968	10.4538	6.86715	9.99406	12.5539	4.04752	6.83696	10.2206	9.54408	7.60638	5.56479	9.06459	9.9759	6.19962	12.8233	7.54282	4.00858	6.96878	11.5987	5.59732	8.35495	11.9012	4.3965	5.58241	9.17159	5.16379
463	control	African	12.9275	6.32436	8.84724	9.7532	6.47559	12.3615	11.3249	6.61983	8.64109	5.17276	10.8932	6.06822	9.18917	7.68721	11.0002	6.75056	3.6049	8.83454	7.5338	12.354	10.1617	8.16573	11.0287	6.26022	9.37136	12.4326	3.51919	6.44115	9.44274	9.91998	7.63059	5.6731	9.05459	9.12335	7.03332	11.2419	6.93493	5.05476	6.66894	10.9039	5.60395	12.4067	11.8553	2.98712	5.28708	8.49923	4.19582
464	control	European American	9.72385	6.30569	8.50698	10.0855	6.71662	11.7265	11.4159	6.25587	9.07354	4.28654	12.3261	4.58397	10.2567	8.94926	8.14991	4.75008	3.7603	9.09465	7.75416	11.8274	10.1872	6.22273	10.6857	8.29265	10.038	12.7067	3.67841	6.68476	8.57839	9.62069	7.38006	5.28602	8.51618	10.094	6.58605	13.5334	6.85595	4.42598	6.65989	11.5619	5.57186	8.42641	12.1986	4.02763	5.78424	9.02762	4.60107
466	case	European American	8.86178	6.62112	8.49951	10.4836	6.69156	11.8122	11.3727	6.01201	8.71428	3.58539	12.4411	5.34364	11.1571	8.18472	7.70697	4.66917	4.75568	9.65419	7.95372	11.776	9.9227	7.23183	10.4492	8.4762	10.149	12.6701	3.97211	6.90777	8.52965	9.1253	7.58839	5.37231	8.56157	10.1356	6.32692	12.6373	6.728	4.75847	6.37323	11.7485	5.7403	7.61638	12.0306	3.55324	5.54113	9.03623	4.55676
467	case	European American	6.52789	5.91679	8.6839	9.41162	6.04171	10.7718	11.026	6.90512	8.76419	2.85936	11.6314	5.16401	9.09831	8.63439	9.95261	4.91826	3.13139	8.86035	7.92172	11.8114	9.69745	3.98554	9.8561	6.07033	9.89356	12.5076	4.01238	6.91287	7.65966	8.89523	7.20504	5.73067	8.48326	8.8464	5.98178	13.0402	7.10222	4.6685	5.64638	11.0717	5.47855	7.29526	11.4965	3.77527	5.44526	9.0158	4.5576
468	control	African	7.668	6.46469	8.7252	8.5712	6.96858	10.8797	11.4034	7.05109	8.69108	3.83867	11.1632	5.67723	11.7679	8.58422	8.79828	4.93456	3.55029	8.75384	7.71834	11.3586	9.4769	5.56163	12.7867	5.08866	9.71262	12.7139	4.27273	7.02337	9.55209	8.85825	7.40612	5.5988	9.37557	9.11648	6.13736	12.642	6.92447	4.71137	6.65226	10.7475	5.81379	6.85136	12.2197	3.68097	5.8484	9.05623	4.34538
469	control	African	7.06992	6.89135	9.11719	9.03096	7.38812	11.3076	11.0882	6.56227	8.77648	3.18085	11.449	6.97283	10.1414	8.49249	8.76549	5.40243	3.90869	9.2286	7.64555	11.6977	10.4504	7.03804	12.4723	5.91715	9.86033	12.6885	3.86467	7.2487	9.3573	8.79466	7.47141	6.23093	9.06988	8.8428	6.72597	11.7734	7.64192	4.74652	6.5242	10.7694	5.66232	7.76677	11.8326	3.63037	5.25018	8.99921	5.08014
470	control	African American	7.67867	6.12192	8.48913	10.1988	6.66854	11.8287	11.5741	6.74331	9.07171	2.87164	12.6685	5.44381	10.5287	8.85179	8.60358	4.62664	3.30485	9.16713	7.90111	11.9968	10.4866	7.1953	10.7913	7.08897	9.98041	12.5099	3.32504	7.47299	9.04176	9.1223	7.35241	5.85668	8.42876	9.2666	6.8727	12.8417	7.34261	4.07367	6.51832	10.5886	5.81347	7.95102	11.6651	4.0838	5.4325	9.03936	4.35549
471	case	African American	7.03065	6.20755	8.60364	5.96725	6.17342	7.08144	9.94551	6.16631	8.67369	4.30032	11.4679	4.55843	9.63943	8.93734	7.10062	4.15799	3.67073	8.72004	7.8925	11.1752	9.23992	5.22323	11.7533	4.70391	9.3518	12.3073	3.78872	6.06227	8.03713	8.38611	7.3776	5.33618	8.67618	8.6049	5.49733	11.9025	6.96557	3.93341	6.92685	10.4814	5.75877	6.30631	11.868	3.30544	5.6972	9.10213	4.58878
473	control	African	10.2537	7.04233	8.48518	10.1443	6.94862	11.964	11.2685	6.38904	9.07314	4.10016	11.3495	7.01296	10.4108	8.74887	8.34601	6.13323	3.37991	8.43785	7.55084	12.0264	9.76232	7.30532	11.8302	6.54729	9.74987	12.4734	4.31756	6.40755	9.66014	12.2823	7.89203	5.79546	9.71386	9.37227	5.85749	12.1197	7.34112	5.09114	7.34644	11.3782	6.17465	14.1957	12.4689	3.51238	5.96575	8.97536	4.74243
474	control	African American	7.82614	5.92158	9.08463	9.91268	6.18118	11.1931	10.9578	6.19976	8.45417	5.60907	11.4237	4.71462	10.3448	8.47877	6.9822	5.35037	3.62029	8.4095	7.99622	12.0198	9.1917	5.49812	11.7203	6.151	9.97981	12.5819	3.19528	5.97501	9.46741	8.579	7.11985	5.08718	8.66167	9.11769	5.92238	12.8804	7.08083	4.63898	6.7102	11.4183	4.88805	6.25384	12.3902	2.54581	5.74754	8.86899	4.44905
475	control	European American	8.42197	7.49347	8.59882	9.27342	6.85963	11.2035	10.8053	6.68895	9.67446	5.00086	12.4433	6.10313	12.4545	9.19084	9.97642	6.98045	3.64565	9.59579	7.65156	12.3753	10.1846	6.37635	10.5989	6.71171	9.60494	12.4934	4.32131	6.83206	8.75484	9.82387	7.78813	6.41255	9.81915	9.63429	6.7514	11.9828	7.09714	4.83155	7.89058	11.6447	6.08678	8.34382	12.4906	4.84021	6.87338	9.29557	5.72769
476	control	European American	7.56929	6.26438	8.25573	9.63386	6.44128	11.4449	11.2493	5.28583	9.0448	3.40293	12.6019	5.19389	10.762	9.03069	7.56263	3.90355	4.18436	8.84123	7.66086	11.8145	9.70379	4.17873	9.84297	6.76323	9.58291	12.4121	3.97205	7.16701	9.15481	9.07708	7.60443	5.63425	8.56286	9.09791	6.1015	12.1887	6.78906	4.16513	6.80751	11.8839	5.16076	8.07056	11.7028	3.9232	5.52565	8.9438	4.81862
477	case	African American	7.95365	6.18963	8.87235	9.90737	6.37231	11.2496	11.4583	6.73778	8.85136	3.80478	10.9253	4.69751	10.4902	9.04701	7.064	5.39824	3.83186	8.82805	7.95165	10.9903	9.3608	4.78185	12.4558	5.8195	9.36435	12.5395	3.31747	6.31092	9.43796	9.28301	7.32912	5.76964	8.61643	9.15948	6.19881	13.0212	6.84285	4.39455	7.35581	10.8381	5.40146	7.27542	12.3824	3.66189	5.77608	8.90742	4.30335
478	control	African	11.4985	6.63839	8.54742	10.048	6.61333	12.5682	11.4476	6.00996	9.04512	4.40939	11.6584	5.15715	10.4357	8.79476	9.41127	6.67152	4.31923	9.38569	7.99392	12.2827	9.53126	7.80829	12.2781	7.26103	10.0963	12.627	3.67852	6.06918	9.73994	10.743	7.7501	5.61209	9.19813	9.23385	6.71361	12.352	7.10006	5.53085	7.24464	10.8787	5.81666	9.82413	12.2705	3.31348	5.49056	9.12697	4.91057
479	control	European American	8.85636	6.80958	8.51305	10.1448	6.49359	12.1534	11.161	6.57615	9.23025	3.32141	11.7746	6.07556	10.0073	8.65235	9.13876	5.50007	3.52075	9.16088	7.76172	12.1561	9.54192	8.48491	10.5829	7.05905	10.2812	12.7032	3.44441	6.34518	8.8911	9.34369	7.84172	5.71349	8.9213	9.8712	6.70024	13.0214	6.96655	5.16133	7.68644	11.3288	5.4787	8.43036	12.3235	3.85919	6.61193	9.2957	4.83686
480	control	African	8.15281	6.41824	8.67783	7.81004	7.1099	10.141	11.0462	6.74153	8.84299	3.2273	10.9171	5.7208	9.86796	8.70948	8.1749	4.81342	4.35888	9.17466	7.87863	11.7066	9.00415	8.536	11.9745	5.675	9.72785	12.5984	3.60526	6.09943	9.03406	8.69611	7.38286	6.11654	9.48867	8.96386	6.08722	11.2864	7.39593	5.32361	6.94889	10.8357	5.92611	7.22338	12.1554	2.86371	5.399	9.05886	4.41841
481	case	African American	7.96501	6.2579	8.11742	9.04622	6.33803	9.68088	11.1705	7.06311	8.7246	3.46858	11.3756	4.56349	10.978	8.31318	7.5792	5.19686	3.88115	8.67605	7.4309	11.5532	10.1777	5.57974	12.1752	4.63845	9.39143	12.3516	3.91374	7.05696	9.39467	8.76612	7.29538	5.44772	8.30629	8.46945	5.83357	12.8028	6.72572	5.11801	7.1295	10.7147	5.70632	6.4842	11.643	3.43523	5.41438	8.94229	4.23447
482	case	European American	7.46727	6.49745	8.82784	7.42272	6.58526	9.07732	11.2553	7.11963	8.94557	3.61966	11.8853	4.89832	8.95078	8.68069	7.92032	4.43873	3.53985	8.82692	7.74411	11.4613	9.05303	5.45342	10.4708	5.12562	9.95518	12.6451	3.89712	6.1845	7.8426	8.90623	7.504	5.68743	8.38201	8.77797	5.8821	12.927	7.25796	5.10616	6.7058	11.6545	5.38766	6.67963	11.8195	4.01996	5.93536	9.26322	4.67839
483	control	European American	14.1127	6.30882	8.66475	9.77199	6.56778	12.1791	11.4195	6.08042	8.78808	3.90148	13.2618	5.20246	10.113	8.24051	7.67641	5.48287	3.82702	9.04626	7.94094	12.3603	10.3304	6.04253	10.6988	7.8156	9.86377	12.7145	3.81898	6.86775	9.03135	10.3102	7.61287	5.53547	8.65355	9.40024	6.20926	13.1867	6.60486	4.60475	6.60054	10.846	5.33829	9.56815	11.9952	3.05179	5.57335	9.15492	4.61547
484	case	African American	8.44902	6.21801	8.39697	10.0495	6.50349	12.1214	11.3764	6.59622	8.71347	3.42354	11.5333	5.06153	10.4826	8.87729	7.62011	5.51211	3.54342	8.37959	7.89467	11.6945	9.5368	6.38418	12.0448	8.05417	9.6609	12.4945	3.01247	6.56681	9.37488	10.0648	7.45465	5.28833	8.05423	9.72814	6.05041	12.3795	6.81633	4.48756	6.37343	11.5999	5.13381	9.49568	11.9936	3.17382	5.41178	8.88205	4.27397
485	control	European American	7.84886	6.10858	8.6374	10.0146	6.73095	11.497	11.1584	6.26299	8.83703	3.02445	11.9818	5.52133	9.29364	8.77605	7.56417	4.96517	3.95257	8.60158	7.91974	11.6629	9.7781	5.56857	10.1504	7.53886	9.76167	12.5923	3.68856	6.95226	8.14654	8.43162	7.33774	5.53419	8.30293	9.35378	6.26924	13.1984	7.34194	3.87087	7.24083	10.7392	5.37338	6.94475	11.5647	3.77036	5.54948	8.95974	4.41138
486	case	European American	6.69443	7.29857	8.59319	9.21851	6.69683	10.0473	11.0982	5.86261	9.54206	4.6298	12.8563	6.21081	10.7025	8.54675	9.18209	6.22865	3.30666	9.32602	7.38796	11.8598	11.5556	6.10202	10.1174	5.92982	9.85226	12.5767	4.6278	6.50971	9.00773	8.6619	7.61531	6.20603	9.64875	9.44977	6.41997	12.2579	7.42994	4.93117	7.24057	11.1294	5.86369	9.95186	12.3259	4.48443	5.88239	9.38582	5.53367
487	control	African American	9.88815	6.74144	8.44317	9.5879	6.8877	11.6002	11.3626	6.5141	9.15867	4.08312	11.9379	5.32877	10.3967	9.12108	8.29121	5.48544	3.11685	9.40798	7.81611	11.9833	10.3775	3.73386	12.0123	7.176	9.5755	12.6707	3.38272	7.68173	9.61984	9.71366	7.65699	5.84223	9.27452	9.37444	6.48317	12.9541	7.2958	5.03861	7.38092	11.1348	5.48615	8.57817	12.663	4.55762	5.79327	9.19201	4.67185
488	case	African	13.2617	6.86951	9.86049	5.41818	6.98369	12.1434	10.9172	7.43059	9.06796	5.88516	10.7359	6.4694	10.0085	7.00493	8.06164	5.15722	3.89897	8.77764	7.65056	12.8265	10.1873	5.93017	12.0146	6.71239	9.37984	12.5694	4.24121	6.42488	9.05939	9.70542	5.76427	5.42904	9.57261	8.96373	5.96573	11.0149	7.00165	5.86715	6.72026	11.118	6.06899	10.5883	12.551	3.40747	5.95793	8.93367	4.43039
489	control	African American	8.27825	7.62816	9.16885	10.1396	7.12387	11.4693	11.2255	6.42093	9.93664	5.02494	11.9081	6.48774	9.82481	9.21128	9.36085	7.06784	4.05999	9.32653	7.69351	12.3878	10.5073	7.37587	12.6359	6.84282	9.78604	12.6311	4.4181	6.90448	9.00277	9.46944	7.75017	6.35665	9.58391	11.1366	7.77864	13.1053	8.40407	4.89843	8.07101	11.5227	6.56896	7.92268	12.6827	5.31636	5.98562	9.73324	5.64582
490	control	European American	8.10619	6.2167	8.2536	9.35568	6.23541	11.2089	11.2099	6.3058	8.94434	5.11528	11.9909	4.93988	9.28942	8.58323	9.24137	4.77778	3.48151	9.27569	7.85425	11.8367	10.2335	5.86631	10.2734	6.47895	9.58226	12.6592	2.93259	6.46952	8.10016	8.23708	7.48535	5.743	8.68319	9.66378	5.91945	12.1007	6.98966	4.08129	7.0342	11.1992	5.30284	6.84374	12.2875	3.93136	5.61926	8.89653	5.06649
491	control	African	6.94891	6.34659	8.70265	9.40089	7.02474	11.6515	11.1791	6.73494	8.78835	3.05068	11.2551	5.96537	10.2993	8.4719	7.7117	5.42959	3.65345	8.59849	7.72034	11.8467	9.04054	7.80386	12.1694	5.91224	9.88302	12.5323	4.30158	6.45038	9.2121	9.3818	7.52159	5.69335	8.94445	8.50739	6.79532	11.6936	7.02531	4.75486	7.12311	10.7505	5.60708	8.19375	12.179	2.9737	5.66499	8.85184	3.85103
492	case	African	14.936	6.3605	9.43174	7.69189	6.97405	11.9814	11.0182	6.04747	8.60253	12.1449	11.8998	6.07534	10.99	8.13758	8.51378	5.74458	4.24119	9.04403	7.93146	12.1197	9.24803	6.49266	12.4809	8.45652	9.43644	12.6169	3.59452	6.25376	9.41036	13.0315	7.90865	5.34732	8.00599	9.85834	6.68917	10.2309	7.05384	5.46051	6.74828	10.8898	5.64061	14.2859	12.5019	3.48561	5.46917	8.87309	4.10867
493	control	African	11.3468	6.86481	9.23026	9.64335	8.16494	12.224	10.8232	6.64269	8.96221	4.80634	11.1469	6.43242	10.2514	8.60497	9.15916	5.79997	3.53285	9.12996	7.64485	12.2414	10.8013	9.24709	11.2737	6.92554	9.80827	12.505	4.06093	7.65955	8.6066	12.3574	7.55866	7.71583	9.61366	9.26902	7.48285	12.8051	7.42621	4.98479	6.86767	10.9703	6.06816	11.0231	12.1468	3.36979	5.60412	9.06278	4.26816
495	control	European American	13.8052	5.99774	8.53601	9.40803	6.60371	11.3588	10.8962	6.05639	8.53369	5.39326	12.8228	5.60931	10.2721	8.19132	7.75111	4.31456	3.43591	8.40215	7.4867	12.0214	8.78245	7.93304	10.4299	6.59009	9.6982	12.2744	3.44191	6.76316	9.38163	10.2712	7.4317	5.04775	8.17591	8.74796	6.05217	12.353	6.56612	4.28924	6.57047	10.8073	5.23685	9.48093	11.4207	2.96492	5.39223	8.87477	4.30647
496	control	European American	6.47223	5.49079	8.18371	9.70473	6.29986	11.5007	11.1304	6.01009	8.41434	2.99463	11.6898	4.73054	8.91608	7.76828	7.30087	4.97758	2.95322	8.47991	7.48091	11.3769	9.47695	6.93944	9.76396	6.48711	9.42296	12.3101	2.66416	6.68659	8.07529	9.07396	7.30848	5.3317	7.81884	9.35613	5.89723	12.5152	6.34009	3.70479	6.21837	10.8148	5.08125	7.33267	11.6363	3.16349	5.37499	8.76955	3.97578
498	control	African	10.9509	6.47281	8.82218	9.65817	7.71948	12.2765	11.3415	6.93741	9.04738	5.30231	11.7357	6.88707	11.7701	8.53111	8.40654	5.7671	3.91267	9.00129	7.7214	12.1156	10.453	8.15037	11.4576	7.02064	10.1069	12.6516	3.94571	6.62464	9.81183	9.57729	7.71306	5.94431	9.14204	9.18377	6.61388	12.8131	6.80615	5.44469	6.79797	10.832	5.6841	10.2877	12.0274	2.92121	5.68148	8.79351	4.70084
499	case	African	14.4437	6.41818	8.9339	7.08981	7.00216	12.5489	11.1805	6.6081	8.90065	13.6586	14.5213	5.30853	10.2356	7.89381	9.44664	4.09381	4.74394	9.66579	7.84347	12.7454	9.74222	8.45221	13.3865	9.92739	9.19709	12.6599	3.11416	5.89889	8.92859	13.5628	7.86893	6.05869	9.58355	10.7901	6.40274	10.636	7.52912	5.16826	6.93753	10.9317	5.56849	14.3284	12.0894	3.71093	5.27749	9.10876	4.17162
500	case	African	10.8626	6.0259	10.6116	5.67721	6.90601	12.3239	11.0517	5.80644	8.50585	4.56499	11.4169	4.94516	10.091	7.03493	7.41726	4.18113	2.55286	8.58216	7.58825	11.8024	9.14967	4.02987	12.4546	7.85627	7.34072	12.2608	3.06022	6.38147	9.35143	7.62449	5.3082	6.78122	8.78852	9.88975	4.73814	8.99856	6.46899	4.52151	6.43916	9.43486	5.64042	7.43658	11.2366	3.19456	5.92551	8.58625	3.87215
501	control	African American	8.75295	5.74971	8.5266	9.90979	6.70434	11.7817	11.3963	6.18245	8.77044	3.6789	11.924	5.70314	9.80064	9.12428	7.26731	4.78191	3.2498	8.49683	8.08688	12.0347	8.50094	4.96082	11.2022	7.09158	10.2395	12.61	3.06914	6.60348	9.89981	9.3276	7.34797	5.52864	8.73468	9.40667	6.12313	12.6086	7.04537	4.31914	6.7366	10.6003	5.36268	7.71109	12.011	3.59384	5.58175	9.01504	4.5618
502	control	African	7.85855	7.19636	8.70314	9.1013	7.73653	10.7864	10.9225	6.40345	8.96909	5.03661	11.7376	8.15011	10.8974	8.92133	10.4452	5.44719	3.69757	8.82905	7.3254	11.9845	10.2394	8.81329	12.2495	5.99808	10.0855	12.564	4.87255	7.31058	9.28681	9.26839	7.51189	5.84236	9.94132	8.81857	7.51449	12.6682	6.80337	4.86573	6.6743	11.3004	6.85814	7.8673	12.1165	3.22722	5.51379	8.69643	5.08876
503	case	African	8.33754	5.95992	10.3122	5.37857	7.09415	12.3364	10.9394	6.11738	8.71956	5.31223	11.0501	5.36423	10.3594	7.05663	9.14797	4.58785	2.26464	8.91385	7.75442	11.9152	9.32046	4.6394	11.6955	7.76709	8.57124	12.699	3.71584	6.51913	8.50795	8.26592	6.49156	5.40087	8.77914	9.64712	5.38054	9.74898	6.9826	4.69272	6.1838	9.16485	5.54481	6.699	12.1978	3.84244	5.39047	8.97051	4.3567
504	case	African American	7.42261	6.19377	7.96565	9.46028	6.99324	10.6039	11.1205	5.43588	9.1088	5.25988	12.8171	5.47068	11.1953	8.50009	8.07741	5.15143	3.60888	8.97426	7.41894	11.5542	9.76092	5.78445	10.952	7.77851	9.84987	12.3442	2.84032	6.75051	8.82523	8.94381	7.17472	5.47083	8.76422	9.6467	5.94476	13.122	6.9808	3.96085	6.59188	11.4338	5.75331	7.01212	12.1085	3.47041	5.72003	8.75336	4.22326
505	case	African	10.9594	7.87327	11.2387	5.89961	7.15128	12.2662	11.1484	7.08195	10.0197	6.08118	10.117	5.98319	10.6011	7.47995	10.2119	4.60812	3.23701	9.49889	7.75046	12.27	9.57652	7.9485	12.052	6.99593	7.21504	12.3188	3.53331	6.45895	8.36449	8.78023	5.97485	7.33347	9.54936	10.1271	6.21689	9.34401	7.16969	5.79716	6.57288	10.7554	6.37218	9.86182	11.9837	3.95821	5.51798	9.30115	4.36155
506	case	European American	8.10634	6.63466	9.05536	10.0669	6.91049	11.6822	11.2505	6.79779	8.95135	3.45992	11.604	5.8965	9.69947	8.55753	9.10604	5.41282	4.00838	9.01188	8.04477	12.3424	10.752	7.33369	10.0283	7.36917	10.2248	12.6573	4.19331	6.64522	9.10096	9.57991	7.54322	5.72191	9.06815	9.49089	7.10599	13.2519	7.06006	4.29106	7.07216	11.2156	5.58822	7.34732	12.0378	3.60197	5.71824	9.08818	5.09888
507	control	European American	14.7852	9.08653	9.27793	9.65124	7.68191	11.7282	11.0913	6.43199	9.9979	8.10479	13.3392	8.16478	9.4958	8.47164	10.3562	6.73187	4.51917	9.80165	7.4	13.2118	11.5401	7.8654	11.3084	8.61549	9.96829	12.592	6.03399	7.81426	8.27837	9.95147	7.9584	6.54705	9.90982	10.6149	7.92524	12.9687	7.53225	6.09878	8.24077	12.0758	6.70601	9.45849	12.567	4.95526	6.05238	9.98071	6.91052
508	control	African	10.4534	6.73692	8.97817	9.73133	7.44721	12.2019	11.357	6.50862	9.2859	4.20934	11.1831	6.44962	10.3987	8.59219	9.98894	6.2945	3.80401	9.22231	7.30173	12.1545	9.43284	8.43276	12.4373	6.93431	10.0904	12.5832	4.40467	6.87446	9.12003	10.7608	7.33669	5.86422	9.84662	9.36631	7.22443	12.7536	7.15714	5.10809	7.04257	10.0952	6.21407	9.24713	11.9889	3.81199	5.71999	9.13135	4.94091
509	case	African American	8.73766	6.73785	8.76875	10.1062	7.11054	12.0771	11.4035	6.53198	8.78414	3.47743	11.4819	5.63618	9.75981	9.13631	8.12347	4.75479	4.40322	8.92735	8.02778	12.2792	9.64685	6.16702	12.6785	7.2894	9.53909	12.5151	4.12478	6.70972	9.33325	9.14666	7.80814	5.79293	9.03433	9.44422	6.66349	12.3816	7.84267	4.27634	7.02545	11.211	5.91076	8.96257	12.2474	4.01686	5.72816	9.25301	4.92039
510	control	African	9.47562	6.15946	8.33467	9.50792	6.89286	11.6254	11.3694	6.58765	8.51994	4.14147	11.2706	6.17736	10.7272	8.51402	8.00807	4.98229	3.35625	8.73388	7.72608	11.6823	10.721	5.94967	12.5188	6.57641	9.92038	12.6038	3.64028	6.50185	9.62097	10.6932	7.52997	5.53606	8.75984	8.91923	6.61239	13.004	6.64221	4.94434	6.63714	11.3151	5.53587	14.1126	11.99	2.92016	5.3957	8.81242	4.01109
511	control	European American	6.81127	6.18605	8.53215	6.03079	6.48309	7.74088	10.5471	6.35534	8.73426	5.23522	11.9416	5.27545	9.06426	8.19934	8.22	5.16032	3.9934	8.53862	7.76032	11.1324	9.7855	4.0491	9.70522	6.05978	9.96524	12.4515	3.55073	6.5428	7.95474	8.45781	7.1204	5.56427	8.52639	8.99909	5.22345	12.8332	7.4532	4.54485	6.59072	11.507	5.41749	6.83884	11.3144	4.22262	5.59513	9.39352	4.51154
512	case	European American	7.37528	6.74693	8.40592	9.12687	6.77622	10.4937	10.8936	7.061	9.4805	4.03321	12.23	5.13063	9.83311	8.66261	7.73767	5.21957	3.45602	8.873	7.69322	11.6653	10.4577	4.8252	10.2078	6.8768	9.96846	12.519	3.51263	6.88661	9.07494	8.7195	7.62892	5.5398	8.4148	9.10064	5.87274	13.2674	7.68489	4.93282	7.10782	11.5991	5.36179	6.50597	12.3909	4.41442	5.79782	9.29063	4.75354
513	control	African	11.3537	6.76763	8.67343	9.70832	6.78311	11.8118	11.0462	6.03802	8.98981	3.84083	11.6001	6.2515	10.06	8.98957	9.00064	5.42398	4.10769	8.6253	7.63044	11.8451	10.4778	7.56042	11.941	6.6575	10.0269	12.4546	3.93843	6.56714	9.21624	9.93878	7.81706	5.78887	8.71933	9.14973	7.30657	12.9421	7.07698	4.76351	6.75539	11.3973	5.95072	8.5931	12.2885	3.29872	5.75991	9.00684	4.69308
514	control	African	13.1625	6.519	9.20869	10.5206	7.75491	12.2473	11.2502	6.3948	9.33496	7.3543	11.0136	7.01508	9.957	8.26603	8.41316	6.05688	4.10375	9.98914	7.8974	12.7187	11.0314	8.95533	12.1026	7.42538	9.35164	12.6366	3.92979	6.65551	8.19914	10.3243	8.08368	5.89376	9.15195	10.2486	8.03925	13.5703	7.51248	5.2143	7.22595	10.8015	5.89149	9.4284	12.5437	3.9086	5.80044	9.24225	4.52318
515	case	African	13.7885	6.74167	10.4381	7.54581	7.11491	12.8847	10.9635	4.6189	8.69048	5.51209	10.0828	4.18103	9.32145	6.95413	8.09125	3.8653	2.5636	9.18176	7.28185	12.8	8.99627	9.24001	11.2947	8.54975	7.79433	11.9718	3.65042	5.86425	8.18524	9.44905	6.97378	6.21117	9.03554	10.1234	8.06434	9.69337	5.70567	3.85819	6.69001	9.86429	6.3965	13.5262	12.2656	4.03427	5.07412	8.45842	4.45294
516	control	European American	14.7687	6.60035	8.91888	9.65664	7.05821	12.5147	11.4838	5.96983	9.34229	9.93384	14.6393	5.33728	9.11691	8.63863	8.54002	5.90426	4.43931	9.26437	8.06817	12.9417	10.9892	6.9438	12.8923	8.74536	10.3935	12.6247	3.84715	6.70268	9.22359	13.2814	7.6169	5.41808	8.382	10.2209	6.76446	13.0699	6.61389	4.90925	7.24402	11.4788	5.77298	12.9899	12.384	4.24339	5.8821	8.96956	5.08626
517	control	European American	7.03931	6.79714	8.62815	9.54018	6.45124	10.8778	10.9783	6.4556	9.42657	3.86952	12.1517	5.33396	10.5085	8.59117	8.75161	5.29998	3.05152	8.72133	7.55386	11.8856	9.42742	6.05122	10.0567	6.39941	10.0648	12.3015	3.80722	6.672	9.15237	9.18207	7.72578	5.72583	8.76363	9.37316	6.4476	13.1064	7.73174	5.1555	7.43398	11.9422	5.7722	7.02433	12.1116	4.39267	6.4266	9.33547	5.07925
518	control	African	12.4871	6.13091	9.21054	10.1172	7.00062	12.6047	11.4796	6.55825	8.54533	4.91143	11.2584	6.0206	10.8125	8.95401	9.80026	5.85805	3.74146	8.30568	8.04102	12.5046	10.1636	9.31873	11.8631	7.99835	9.87112	12.6567	4.74941	6.72413	9.68727	10.7302	7.23961	5.51244	8.81964	9.31544	7.15466	12.9458	6.95714	4.16622	6.3828	10.8394	5.59929	9.74202	11.9949	3.10418	5.68987	8.66484	4.45585
519	case	African	12.8787	6.69692	8.74222	9.37262	6.72333	12.1201	11.0224	5.80554	9.09639	7.04494	11.4095	6.33877	10.6519	8.61048	9.40654	4.87737	3.96583	8.67949	7.61641	11.9619	10.2945	7.60852	11.8749	7.826	9.9139	12.5528	3.88074	6.80379	8.22631	11.5403	7.49693	5.89341	9.01158	9.59886	6.69138	10.9239	7.57303	4.67106	6.72549	11.5399	6.22413	12.415	12.2708	3.62027	5.33698	9.10113	4.88815
520	case	African	14.4452	6.59779	8.89499	9.02207	6.64508	11.6608	10.8366	6.67609	9.55602	11.6535	11.5758	6.09783	9.5995	8.53532	9.42816	5.31745	4.69562	9.53655	7.34872	12.4035	9.97837	7.95268	12.8458	8.56206	9.39151	12.3094	3.99647	5.44388	9.08559	13.2919	7.69142	5.98914	9.58952	11.2297	7.05209	14.152	6.99873	4.98677	7.64472	12.7327	6.21685	14.0737	12.3911	3.55912	6.1994	8.6504	4.66512
521	control	European American	7.9133	6.284	8.49656	9.66091	6.65275	11.5293	11.0793	6.22748	8.85159	3.32727	12.4788	5.47916	10.7851	8.31705	8.68072	4.73749	3.14503	8.83982	8.06515	12.0215	10.0426	5.99108	10.7349	6.73186	9.80033	12.6259	3.4541	6.8437	8.02823	8.44288	7.58004	5.36157	8.93009	9.22361	6.12974	13.0646	7.087	4.57995	6.85867	11.4062	5.57028	6.99559	12.3605	3.81863	5.51519	9.09078	5.07733
522	case	European American	7.07764	6.28234	8.59571	10.6914	6.6639	12.2922	11.4963	7.89105	9.13615	5.24058	12.2943	5.47676	10.0768	8.6564	7.95402	4.65761	4.18357	8.72712	8.15992	12.4491	10.2525	5.85909	11.0958	7.11661	10.5558	12.5055	3.39253	6.80478	8.55705	9.30874	7.74119	5.76144	9.07869	9.36985	6.43025	13.036	7.27265	5.20918	6.35873	11.3799	5.12381	7.67237	11.8458	3.05127	5.671	9.40094	4.48228
523	control	African American	6.72006	5.8935	8.6682	9.58416	6.22511	11.4866	11.1659	5.98422	8.54367	4.44152	11.0344	5.87898	10.6071	8.70876	6.9005	3.70885	3.22533	8.2133	7.81121	11.6203	10.4025	6.15045	12.1727	5.97043	9.2178	12.6569	3.39767	6.15833	8.58849	8.66388	7.49742	5.09573	8.67382	8.98421	6.41398	13.1057	6.67327	4.17237	6.49796	10.2394	5.11883	8.02912	12.0099	3.26373	5.46438	8.81085	4.20926
524	control	African	9.31451	6.0406	9.48151	8.83649	7.02138	11.7931	10.9902	6.45157	8.46224	3.94759	10.5421	4.70893	10.2575	7.703	8.33345	4.80529	3.34431	8.53421	7.5172	11.9162	7.99364	6.06577	12.0099	6.3251	9.74063	12.5342	3.16066	5.95597	8.82876	8.88762	7.35948	5.40925	8.81097	8.85868	5.91406	9.32871	6.76523	5.4253	6.34145	10.2896	5.286	7.50931	11.6799	2.64333	6.36608	8.63917	3.93681
526	control	European American	6.98836	6.6688	8.75847	6.94814	6.5249	8.54851	10.482	6.62882	8.81708	4.2843	12.1853	6.02968	10.0271	8.53547	8.54655	5.00779	3.32552	8.52679	7.65761	11.749	9.35258	5.28946	9.78465	5.87371	9.97278	12.5646	3.91459	6.42614	8.59573	8.7535	7.47197	5.61008	8.77849	9.41915	6.29999	12.3305	6.88186	4.2937	6.68075	10.6999	5.68198	6.56417	12.0533	3.17123	5.55885	8.96059	4.89711
527	control	African	9.37065	6.29248	8.61211	9.22554	7.25615	12.138	10.834	5.8413	8.8155	4.19498	11.1338	6.58824	10.8169	8.44174	8.68441	4.74232	3.79858	8.77988	7.84136	11.7264	10.1724	7.87889	12.14	6.40786	9.65506	12.4396	3.81264	6.04241	9.30947	9.76126	7.32968	5.35414	8.7756	8.87832	6.62049	12.7666	6.42812	4.21984	6.12697	10.6936	5.7149	8.58575	11.8579	2.01025	5.79989	8.93836	4.30511
528	control	European American	6.4504	6.45515	8.66994	8.739	6.56215	10.0166	10.5589	6.33221	8.56309	3.14095	11.6381	5.45153	9.46681	8.3736	8.0277	5.24621	3.68533	8.27637	7.45864	11.5731	9.64275	4.68573	10.2245	5.79675	9.34488	12.1557	3.88663	6.20296	8.15719	9.25442	7.11139	6.94606	8.01682	8.91948	6.32205	12.9513	6.30116	4.6483	6.42345	11.1761	5.53191	7.15505	11.2186	3.43169	5.7531	8.79857	4.48948
529	control	African	11.6219	6.0862	9.24183	10.3176	7.03361	12.4862	11.6889	6.38878	8.36604	4.19567	10.9384	6.37272	11.4192	8.71017	8.47986	5.28455	3.99659	8.54645	8.09546	12.74	10.0764	7.85171	13.0991	7.0316	9.90225	12.7066	3.39435	6.61328	10.189	11.0761	7.62031	5.51648	8.34034	9.25976	6.5206	12.4098	7.05129	4.69194	6.7503	10.4047	5.77319	9.46651	11.9296	3.28702	5.60856	8.84431	4.53619
530	case	African	15.1463	6.69354	11.0958	7.86421	6.94254	13.4275	11.4016	6.99886	8.48849	13.9149	14.5607	4.39585	10.8989	7.14113	7.83269	4.39055	4.27176	9.70402	7.71028	13.1264	10.5908	9.41992	13.9899	8.83305	7.634	12.4165	3.73883	4.08374	9.4144	13.4403	7.42192	6.83088	8.95692	10.6981	6.79665	10.3257	6.23808	5.54193	6.43429	10.7785	5.67629	14.309	12.4545	3.47182	5.5848	8.48761	4.31629
531	control	European American	10.0178	6.66945	8.66103	9.38269	6.3363	11.8068	11.3973	6.57577	8.98079	4.39073	12.4819	5.61215	10.7614	8.66823	8.27479	3.61721	3.72511	8.76917	7.61553	12.2726	11.231	4.96458	11.3717	7.47062	10.0644	12.6476	3.92507	7.13157	8.43385	9.76857	7.74146	5.67618	8.6292	9.77054	6.13994	13.9229	7.18078	4.85927	6.79799	11.417	5.66742	8.84061	12.0888	3.98518	6.11587	9.14238	4.54981
533	case	African American	8.06196	6.37386	8.64549	9.75462	6.43473	10.906	11.2875	7.36335	8.68405	5.00106	11.5993	4.86677	11.013	8.79827	6.98759	5.2903	3.63538	8.86868	7.84287	11.4643	9.27684	5.19064	12.6297	6.8268	9.68523	12.4801	3.72169	5.93587	9.71805	8.83153	7.54778	5.58161	7.78988	9.4329	5.79958	12.5188	6.48068	4.3887	6.40196	10.0171	4.89652	7.74929	11.8457	2.4462	5.51623	8.71637	4.2432
535	control	African American	10.6897	6.3623	9.02905	10.1768	7.1737	12.4846	11.2712	6.81399	9.32175	4.40793	10.9181	5.30554	9.82901	8.9602	7.52275	4.68031	3.94652	8.94206	7.97816	12.5446	9.98562	4.78217	12.8223	6.95556	10.104	12.5925	3.17593	7.05755	9.56149	10.7257	7.81351	5.73927	8.85431	9.35303	6.29015	13.1407	7.19993	4.86999	7.67752	11.3336	5.30002	14.498	12.2755	4.23379	6.22518	9.23393	4.75986
537	control	European American	7.18273	5.98256	8.69917	9.28146	6.58106	11.193	10.593	6.15082	8.79817	3.68679	12.2628	5.16266	8.99461	8.7028	8.1196	5.46496	3.34665	8.87265	7.65056	11.594	10.4702	4.9109	11.2155	6.15986	10.1425	12.5588	3.82075	6.47861	8.26648	8.90059	7.48976	8.40203	8.87966	9.01486	5.99704	12.6225	7.29158	4.61197	6.35382	10.8918	5.27649	7.49142	12.1229	3.72549	5.7201	8.84102	4.73427
538	control	African American	8.37164	6.0689	8.39133	10.3728	6.42399	12.208	11.3666	6.44618	8.38744	3.43025	12.0625	4.87619	10.0559	9.28413	7.46404	4.75747	3.34944	8.97362	8.24375	11.8126	9.42241	6.72161	11.8302	7.48633	9.51063	12.6879	3.48678	7.03698	10.0713	9.73754	7.42392	5.01579	8.48704	9.56921	6.56278	12.7366	6.18913	4.70996	6.37062	10.7108	5.39814	8.08575	12.1205	3.3046	5.45773	8.78283	4.22046
539	case	African American	7.76574	5.88425	8.42004	9.69469	6.27689	10.5488	11.0945	6.39139	8.58046	3.98351	10.8544	5.05009	9.75813	8.25479	6.63128	4.71343	3.94726	8.36831	7.6905	11.2752	8.19625	6.94147	12.8212	6.02906	9.30065	12.4273	3.40454	6.47639	9.3704	8.30232	7.37804	5.14793	8.08674	9.25748	6.01424	12.026	6.87824	4.01346	7.13726	10.9201	5.01707	7.59441	12.1274	3.22338	5.59877	8.80008	3.77113
541	case	European American	9.00457	6.56419	9.2671	9.54183	6.39453	10.7092	11.0336	6.41212	8.82308	4.92991	12.1648	5.51299	9.82702	8.0938	8.15443	5.48226	3.24634	8.89775	7.90645	11.8287	9.51816	6.08768	11.0287	6.92586	9.50769	12.4552	3.49856	6.57043	8.60124	8.74516	7.3962	5.5904	8.16516	10.172	6.21547	12.8299	6.64887	3.82193	7.52271	11.1035	4.64311	7.35025	12.2639	3.29761	5.76787	8.98332	4.97288
542	control	European American	8.16202	6.69608	8.24262	9.99378	6.52015	11.5318	11.4733	7.31521	8.8463	3.47523	12.7389	5.26743	10.7267	8.77726	8.92052	4.87566	3.98817	9.42465	7.59585	12.3077	10.5033	6.28125	11.053	7.07973	10.0584	12.6738	3.80733	6.67513	9.52917	10.7502	7.52137	5.47933	8.86218	9.4522	6.52852	13.3331	6.76863	4.57007	6.89074	10.6901	5.59867	8.87461	11.6259	3.95917	5.56047	9.01429	4.79953
543	case	African	8.83672	5.78933	10.0243	6.3172	6.36635	11.8108	10.2253	5.39414	8.41099	5.47301	9.23041	3.87103	9.295	6.67024	10.1712	5.04091	3.67412	8.7922	7.07911	11.1979	8.23727	6.19201	11.6693	6.39506	7.79316	12.2111	2.80218	4.14945	7.52567	8.40501	7.26485	6.37094	9.52108	9.27696	5.80676	8.89644	6.86666	4.85682	6.31807	10.9221	5.37024	7.38503	11.1717	2.84908	5.89396	8.29679	3.73527
544	control	African American	10.6529	5.89127	8.60639	10.2227	6.87202	12.136	11.3581	5.95932	8.59123	4.29183	10.9762	5.7411	10.1551	8.79861	7.16665	5.5643	3.4299	8.44408	7.80271	12.2571	9.93217	6.62111	12.8366	7.37877	10.14	12.6468	3.68765	6.67197	9.53306	10.3716	7.36562	5.12269	8.4385	9.35861	6.53197	12.9463	6.24724	4.44485	6.57104	10.4675	5.6068	9.35525	11.751	3.27036	5.48736	9.01732	4.32167
545	control	African	9.65268	6.41829	8.56175	9.2984	7.01418	11.8171	11.2128	6.55663	8.75919	5.04101	11.3089	5.45228	10.2328	8.6477	7.93121	5.99543	3.8831	9.2782	8.10646	11.9744	9.84776	6.64905	12.866	6.7285	9.88761	12.6544	3.75776	6.78193	9.39431	9.28322	7.52264	5.68597	9.22575	9.45251	6.27016	12.6545	7.25752	5.18415	7.13111	10.6753	5.93683	8.39632	12.4065	3.72829	5.73719	9.20983	4.35503
546	case	African	11.4623	6.71879	9.95664	8.76228	7.80357	11.9572	11.1107	6.79295	9.06642	4.43972	11.0648	6.07392	10.6345	7.43887	9.36545	4.8611	4.08553	9.2454	7.83422	12.1742	8.86936	10.1274	12.6462	7.5942	9.29852	12.5701	4.20122	6.23384	9.29237	10.9886	7.79805	6.33064	9.65901	9.43643	6.74022	9.56737	7.90726	6.11192	6.67643	11.2644	6.56853	14.0669	12.5111	3.96305	5.77282	9.43767	4.93789
547	control	European American	6.71095	6.24448	8.57002	9.35188	6.39118	10.7788	11.1601	6.4542	8.79817	3.81183	12.3663	4.63041	10.4645	8.9146	8.32504	4.67544	3.23083	8.19065	7.59238	11.6671	9.68679	5.07254	10.4487	6.38065	9.85986	12.5957	3.38095	6.55776	8.6384	8.98276	7.63107	5.18014	8.36942	9.26265	6.11574	12.5478	6.76393	4.87408	7.53407	11.0478	5.15019	7.06383	11.7131	3.94458	5.58877	8.92334	4.48239
548	control	African	11.5402	7.21301	9.16056	9.07724	8.42049	11.4489	10.3272	6.05641	9.54373	6.66972	11.6436	7.89541	8.5453	8.24114	10.3322	8.66152	5.02288	9.26826	7.86565	12.612	10.7095	11.1399	12.3966	6.62633	9.84233	12.2625	4.33531	7.80386	8.50472	9.63548	7.57647	6.93873	9.86557	10.8711	8.5973	13.5666	8.3787	6.55897	7.5634	10.5018	6.4713	9.79391	12.5837	4.67072	6.10649	9.48736	4.84385
549	control	African	11.7857	7.12004	9.31016	9.74041	7.82249	12.0537	11.3123	5.91553	8.88047	4.98645	10.7469	7.02243	7.74187	8.87972	9.39645	7.78526	2.98671	9.2972	8.24329	12.3088	10.2838	9.34387	12.9992	6.89441	9.47181	12.6516	4.18459	6.41893	9.2377	11.9661	7.59162	6.19425	9.09517	9.47202	7.02958	11.4863	7.78458	5.83541	7.30635	11.1674	5.67641	14.3838	11.6485	3.49092	5.61994	9.23981	4.9674
550	control	African American	8.67981	6.89178	8.28653	9.41816	6.34657	11.4139	11.1534	6.10873	9.26702	4.77104	11.4584	5.44499	9.31232	9.19229	8.20114	4.11007	4.04836	9.61053	7.47083	11.7027	9.81083	5.83185	12.2564	6.47015	9.56164	12.5984	3.74202	6.3984	8.87383	8.90037	7.7685	6.51657	9.53067	8.74732	6.55645	12.5955	7.35089	5.02492	7.40035	11.3569	5.80537	7.51372	11.6625	4.46436	5.80005	9.36327	5.44764
551	control	African	11.6909	5.93429	8.46182	9.11764	7.27402	11.5152	10.7659	5.5666	8.83344	3.54108	11.2476	6.65067	8.65886	7.89929	9.20724	5.40652	3.9958	8.7994	7.7272	11.9331	8.65613	10.5514	12.0754	6.76447	9.78426	12.4773	3.54342	7.52333	8.81549	12.8188	7.48826	5.72762	8.5775	8.80719	7.40258	11.9832	7.40412	5.21197	6.72195	10.8928	5.49158	14.3927	11.7175	3.36906	5.94067	8.8988	4.24866
552	case	European American	12.6854	7.04632	9.0066	6.68799	6.99511	11.9377	11.0524	6.31146	9.45007	3.96551	12.9595	5.89647	10.7758	8.47308	8.27296	6.75612	3.86249	9.4617	7.81766	12.7291	10.2565	5.98573	10.7802	7.6848	10.1955	12.5028	3.94203	7.21442	8.8703	9.55118	7.77705	5.75973	9.00463	9.64802	6.89371	13.5479	7.60518	5.35214	7.70474	11.3913	5.72116	8.71918	12.4217	5.04211	5.56706	9.43626	5.55114
554	case	African	13.3031	6.51689	9.15392	7.73023	6.59946	12.3151	11.1072	6.32505	8.8811	4.75692	11.1717	5.47642	10.7825	7.91561	7.54272	6.06918	3.96998	8.71238	8.10359	12.0293	9.66703	6.71295	12.5391	7.58435	9.71037	12.6614	3.59702	5.80817	9.63072	10.6522	7.77759	5.33735	8.36605	9.5196	6.30836	10.2962	7.51589	5.29135	6.52981	10.3758	5.03616	9.67138	12.6764	3.2648	5.51272	8.84583	4.20536
555	case	European American	8.29973	7.46545	8.82198	8.34239	7.06528	9.91406	10.4899	6.43893	9.57229	3.80897	12.598	6.0784	10.2911	8.5495	8.53437	6.00511	3.49193	9.33531	7.65381	11.9934	9.92874	6.17501	11.5579	6.30269	9.79639	12.5275	4.40278	7.08268	8.51196	8.9336	7.8904	6.22135	9.40084	9.36259	6.75636	12.6321	7.76227	5.98797	7.57226	11.4826	6.10894	7.47445	11.9524	4.85148	5.88087	9.52562	5.82363
556	case	African	9.24236	6.49869	8.541	7.71404	6.77591	11.7839	11.3873	7.33692	8.68496	4.54557	10.8823	5.55751	11.5639	8.34735	8.14667	3.87302	4.37699	9.20148	7.93394	11.9414	9.28426	6.99331	13.2437	7.5819	9.58445	12.6693	3.29714	6.14559	9.68937	9.05063	7.71921	5.85297	9.62418	9.98823	6.83135	12.2677	6.76692	4.70112	6.73459	10.392	5.68063	7.77151	12.5295	3.23728	5.61955	8.93532	4.33274
558	control	African American	7.79412	7.13346	8.2223	9.85982	6.97643	11.4639	11.2823	6.31299	9.52445	3.54956	12.0615	5.75922	10.9568	8.52287	8.28612	5.21908	3.91619	9.21991	7.51765	12.1103	9.41426	6.50399	11.5964	6.49729	9.70469	12.5926	4.11422	6.905	9.83761	9.15488	7.83177	6.00649	9.52109	9.37385	6.79251	12.3623	7.55484	4.84989	7.43939	10.8207	7.39298	7.76395	12.5514	4.41437	5.71013	9.25006	5.23697
559	case	European American	7.83406	5.71673	8.05845	8.91179	5.83835	10.4645	11.0504	6.03461	8.14027	3.69429	11.5991	5.00996	8.87652	7.92852	6.91551	4.29011	3.4948	8.22926	7.09683	11.2055	9.08734	5.15937	10.2701	5.84355	8.84201	12.2805	2.43304	5.58011	7.79096	8.34633	6.8683	4.89567	7.71873	8.92653	5.53117	12.7416	5.95788	3.67085	6.0037	10.5661	5.07279	6.69493	11.4537	3.21934	4.97998	8.48348	3.9759
560	case	European American	8.07264	6.84221	8.51592	8.81145	7.07934	10.6849	10.564	6.2794	9.00556	5.03009	11.7822	5.73629	8.87239	8.61147	9.00717	4.23972	3.31162	8.83926	7.31889	11.6186	9.94706	5.78985	11.2088	5.71619	9.20729	12.3519	4.24046	7.15703	8.45291	9.66503	7.15016	6.20201	9.35172	8.84359	6.05659	12.7078	6.65839	4.1325	7.35949	10.7982	5.74551	8.2166	11.6687	4.90309	5.00978	9.12274	6.04276
561	case	African American	7.76642	6.76326	8.91478	9.04462	6.3913	10.6918	11.092	6.76359	9.17097	4.31236	12.7827	5.46428	9.68772	9.20629	7.81205	5.55831	3.45436	9.27735	8.07474	11.7048	9.93894	5.78252	11.1039	5.7129	9.74373	12.5548	4.4026	5.57205	9.01107	8.72072	7.61226	5.77748	9.14692	9.67364	6.24739	12.7291	7.27582	5.00599	7.03774	11.6463	5.90702	7.64493	12.2292	3.46252	5.80836	9.20188	5.91709
562	control	European American	7.84204	6.7049	8.25042	9.81036	6.85156	11.5372	11.1079	5.62714	8.9864	3.42075	12.0069	5.71328	9.71558	8.46959	8.31966	5.32541	3.69042	8.62983	7.4977	11.4464	10.9509	4.6528	10.6992	6.71397	10.1539	12.3137	3.91705	7.08955	8.71646	8.96052	7.41109	5.46059	8.84519	9.27465	5.81482	12.9681	7.19607	4.20834	6.71441	10.3742	5.64538	7.26058	11.9126	4.60973	5.64534	9.06976	5.24105
564	case	African American	7.32526	6.42601	8.42939	9.33523	6.78373	11.2738	11.1895	6.44125	8.9563	4.56636	11.9406	5.81437	9.58961	8.81437	8.47063	4.60967	3.56889	8.79565	7.1054	11.5264	9.85042	5.85126	11.6282	6.44774	9.08914	12.3539	3.27088	6.80802	8.65839	8.7193	7.51546	5.75876	8.37069	9.34897	6.52131	12.6643	6.91728	4.43248	6.84253	11.0042	5.54021	7.31709	11.8321	3.95251	5.40988	8.96198	4.44231
565	case	European American	8.282	6.13376	8.27647	10.0348	6.46631	11.3524	11.1511	6.32514	8.38661	3.4357	12.4894	4.72097	10.5233	8.41229	7.81623	4.68456	3.1166	9.19913	7.86166	11.7887	9.36759	4.915	11.4169	6.45668	9.77606	12.4999	2.87473	6.2333	9.29458	8.40095	7.1518	5.34521	8.18503	8.79525	5.77809	12.4856	6.80351	4.27466	6.31467	11.0982	4.92652	6.83607	11.7021	3.44908	5.24595	8.7518	4.28061
566	control	African American	12.5585	6.54146	8.6405	9.57341	6.77396	12.0655	11.1682	6.85997	8.72623	4.54292	12.2443	5.33519	10.6486	8.71892	7.60161	5.19447	3.27569	8.71966	7.58176	12.1378	9.37517	5.58944	11.7128	6.85596	9.80978	12.5412	3.84384	7.2678	9.06989	10.2002	7.47366	5.49497	8.88247	9.20709	6.06493	12.6271	7.12692	4.72587	6.41757	11.4973	5.17477	9.696	11.8759	3.59273	5.39914	9.09739	5.32783
567	control	African	11.2573	7.51635	8.74656	9.27692	7.93155	11.8976	11.0198	5.9596	9.01303	3.89075	10.7018	6.40648	10.1463	8.97352	10.082	5.7418	3.86924	9.40353	7.34267	12.4806	10.2266	8.17831	12.2892	6.46077	9.70631	12.5202	4.86938	6.64032	8.70936	10.8474	7.69644	5.72188	9.83796	9.07432	6.93248	12.9511	7.33517	5.04346	7.32322	10.9521	6.22877	10.0526	12.0552	2.95528	5.98246	9.31687	5.09008
568	case	European American	8.58537	6.39189	8.83421	10.3623	6.76573	11.7912	11.5555	7.04021	8.91179	3.42376	12.0265	5.12463	9.79219	8.78446	8.17655	5.06844	3.34913	9.07961	8.26885	12.1082	9.66903	5.112	11.5438	8.20332	10.6962	12.5787	3.938	7.13399	9.36534	9.75928	7.40782	5.51977	8.5876	9.74451	6.23108	12.5421	6.77606	4.39958	6.53737	11.4734	5.69278	8.71763	11.9098	3.72659	5.47947	9.02806	5.43959
569	case	European American	10.4549	7.39051	8.92281	9.6008	7.23469	11.9309	11.0747	6.46944	9.22582	4.8414	13.6408	5.8526	10.3661	8.7993	9.52764	6.07239	4.39059	9.57031	7.84674	12.313	10.6976	8.68955	11.2534	7.89979	9.92822	12.6179	4.76349	6.99493	9.90523	10.5784	7.73799	6.0019	9.30342	10.0067	7.03514	12.9278	7.69986	4.7949	6.98265	11.3498	6.06467	9.66141	12.2868	4.78249	6.1083	9.18431	5.98384
570	control	African	9.25049	7.05465	8.67146	10.9108	7.92195	12.7056	11.7246	8.84204	9.17355	3.92172	11.5133	6.62846	11.7343	9.51145	11.1285	3.94953	3.90138	9.59178	8.07435	12.5148	10.9423	7.92067	11.3455	7.66744	9.80872	12.4737	4.50344	7.27248	11.0043	10.9338	7.93068	6.82704	9.44881	10.8125	7.77608	12.3502	7.21483	4.77677	7.07145	11.5433	6.37539	9.28716	11.9638	4.50928	5.82977	9.14892	4.97809
571	control	African American	13.746	6.72928	8.55809	9.23643	6.85629	12.0158	11.2687	6.39226	8.71653	4.21492	11.7183	6.0127	11.4842	9.00363	9.40356	5.12786	3.69924	9.41813	7.91145	12.4941	9.9165	5.34031	13.064	7.68343	9.97045	12.6178	5.10544	6.80371	9.00024	9.02094	7.84283	5.79103	9.21823	9.39978	6.44174	12.9441	7.25476	5.08121	6.60256	11.2669	5.67472	7.61155	11.9599	3.96742	5.82062	9.13069	5.32978
572	control	African	10.3666	6.55398	8.72526	9.7131	7.38716	12.4459	11.3821	6.48034	8.96129	4.53589	10.9478	6.19204	10.2057	8.62766	8.55664	5.35551	4.02081	9.29245	7.58201	12.0456	10.0313	9.65242	11.7456	6.87923	9.9597	12.6218	3.98856	6.94257	9.83746	10.0885	7.83068	6.00926	9.35857	9.50336	7.08382	11.5453	7.14276	4.70823	6.9348	9.77546	6.12814	9.28541	12.3388	4.21683	5.73006	9.22379	4.98394
573	control	European American	8.5011	6.80772	8.67697	10.4558	7.09275	11.9562	11.318	6.29303	9.05169	4.99246	12.7935	6.04105	11.2936	8.98856	10.2096	5.0865	3.40439	8.98916	7.60668	12.249	9.94427	6.14454	11.1356	7.20976	10.2641	12.5624	3.6904	6.55387	7.26346	10.0497	7.58533	5.22838	8.24453	10.7372	6.23564	12.6963	6.98588	5.36134	6.8915	10.811	5.77429	8.74581	12.1056	3.86725	7.04061	9.27761	5.04027
575	control	African American	8.49646	6.43638	8.27988	8.12862	5.98756	10.0747	10.7698	6.32289	8.74621	4.01281	11.5604	4.59707	9.83584	8.84802	8.82482	5.52025	4.20243	8.86788	7.44848	11.3055	9.62285	5.40734	11.8574	6.62655	9.08733	12.3661	3.48783	6.23219	8.45615	8.33403	7.151	5.71396	9.05964	9.01414	5.67471	12.851	6.53194	4.19574	6.83291	11.1457	4.92231	7.49558	12.013	2.93416	5.20459	8.39563	3.98632
576	case	European American	7.45007	6.94057	8.83264	9.81939	6.11601	10.7636	10.7767	6.10199	9.33593	4.08357	11.7863	6.16432	10.065	8.60007	8.89105	5.90215	3.58039	8.83121	7.29306	12.0239	9.77031	4.89991	11.343	5.0799	9.95728	12.433	3.78668	6.591	9.23124	9.50988	7.71868	5.49969	8.77597	8.63081	5.78651	12.8784	7.55503	4.76485	7.37537	11.1486	5.28621	7.69486	12.2773	4.10862	6.02459	9.33403	5.03797
577	control	African	14.5154	7.24299	9.01886	9.66795	7.77179	12.4419	11.6106	6.49697	9.00844	7.42294	11.2309	7.85786	11.6688	9.38525	8.88568	5.83957	3.4118	9.19943	7.665	12.2715	10.2002	8.41766	10.429	8.20643	9.96418	12.6121	3.97914	6.96014	9.88403	12.6761	7.4649	5.94668	8.78166	10.1593	7.07758	11.9523	6.76828	5.66205	6.76535	11.3062	5.91866	13.2599	11.8211	2.58629	5.61401	8.90957	4.72627
578	control	African	12.4299	6.46267	8.42486	9.56868	7.04436	12.0651	10.8945	6.18502	8.87619	5.663	11.7523	6.35859	10.9615	8.82655	9.88742	5.37663	4.57472	8.92329	7.70072	12.0072	9.12551	8.57752	12.6753	7.00865	9.99088	12.5911	4.78001	7.08743	9.85258	11.4953	7.69825	7.38632	9.18837	9.31903	7.35558	11.9026	7.53181	5.00435	6.69292	10.26	6.09039	10.3305	12.066	3.83129	5.8348	9.1553	4.69262
579	case	African	14.5865	6.30898	9.52198	7.13105	6.41002	12.0059	11.0012	5.63299	8.34514	4.80633	11.8706	5.59571	10.5759	7.42489	7.94067	5.74905	3.55181	9.16398	7.40732	11.8763	9.36055	7.34198	12.3521	8.39402	9.07759	12.5632	3.29108	6.05782	9.20431	9.91622	7.46256	5.44528	8.45591	9.80712	5.95723	9.29996	6.71902	4.49297	6.05599	10.0492	5.61061	10.0035	11.2305	3.19903	5.49057	8.42457	3.93463
580	control	European American	8.37264	6.76663	8.92261	8.56905	6.85084	10.0312	11.0005	7.45684	8.85891	4.30091	12.3634	5.59874	9.25447	8.96436	8.44668	5.27064	4.38468	8.89088	7.95423	11.5391	10.0874	5.46648	10.513	5.77701	9.71785	12.4579	3.75546	6.85843	8.4287	8.89269	7.45288	6.36272	8.72752	9.43329	6.33572	12.9351	6.7422	4.03948	6.86542	11.6932	5.60037	7.46963	12.083	4.40511	5.58589	8.84032	4.79616
581	case	African	15.233	6.04021	10.3164	8.24217	6.49168	12.8401	10.9886	4.89784	8.06528	6.79315	12.6649	2.8628	7.75432	6.898	7.52275	4.33213	4.86494	10.4559	6.78883	12.481	8.87156	5.08684	10.1693	8.66527	6.58437	11.4651	3.41241	4.4849	7.46984	9.67039	3.53166	6.73896	8.41588	9.27228	6.29128	8.50157	3.84237	4.61034	5.91233	10.3247	6.28727	8.63373	8.78219	2.54845	3.97163	7.88688	3.63698
582	control	African	11.797	5.60159	8.28665	9.44238	6.95483	12.2991	11.3919	5.60956	8.44495	4.39643	10.6465	5.44994	10.5377	7.97563	7.52723	4.90467	3.88907	8.42166	7.9416	12.1968	9.56182	6.84325	12.5526	6.93465	9.38787	12.6016	2.82102	6.48421	9.10586	9.64411	7.48342	5.363	8.44063	8.85163	5.82645	10.9007	7.22077	4.73201	6.19157	10.1926	5.18978	9.60356	11.7344	2.77315	5.37826	8.7677	3.86878
584	control	African	9.12082	6.38437	9.08879	9.49762	7.55388	11.7751	11.2659	5.96577	8.69643	4.1174	10.878	6.47944	10.8655	7.97058	8.93194	5.39525	3.87287	8.82307	7.92661	11.9124	9.63558	9.15593	13.0875	6.10003	9.62563	12.4762	3.52283	6.38226	9.65408	10.3841	7.30971	5.60198	9.42653	9.24178	6.85288	11.1558	7.3671	4.3261	6.63133	10.5293	5.50109	8.91296	12.0541	3.39575	5.60058	8.60989	3.93662
585	control	African American	8.74821	5.94384	8.73385	9.14537	6.32803	11.0748	11.0577	6.65345	8.58622	4.1423	11.427	5.1894	10.8688	8.8562	7.44976	4.93778	3.44641	9.14503	7.99772	11.7071	9.8208	6.63582	12.6528	5.86422	9.44036	12.6036	3.74753	6.31203	10.1431	11.57	7.32093	5.62295	8.29586	9.56669	6.7988	13.4854	6.64622	4.67756	6.93298	10.6402	5.2498	9.1771	12.3261	3.0972	5.76597	8.87235	3.98323
586	case	African	9.36304	7.05977	9.15267	6.92429	7.08057	11.7817	11.2822	7.70247	8.97571	7.67082	11.0708	6.4662	9.07317	8.20758	8.61593	5.39256	4.2234	8.78409	8.0024	11.9651	10.0348	6.22699	13.2362	7.77432	9.82027	12.6351	3.92035	6.34472	8.13142	9.2396	7.55993	5.5746	9.06053	10.0936	6.88651	10.947	6.77458	4.56022	6.16717	11.3189	5.90643	8.89697	12.3504	4.32027	5.56536	9.00632	4.55293
588	case	African	12.7683	5.97248	9.11634	7.32077	6.63305	12.2163	11.3395	6.9602	8.40339	7.29077	10.8584	5.71539	11.4031	8.10724	9.23058	5.11713	3.62057	8.40503	7.90784	11.9439	8.6253	5.44762	13.1268	8.18286	9.32458	12.557	2.9781	7.04715	10.1038	9.84445	7.411	5.28264	8.79663	9.97505	5.90851	10.6994	7.01254	5.09789	6.49297	10.0852	5.4832	11.1485	11.5998	3.24136	5.31672	8.62725	3.78135
589	control	African American	12.2622	6.01195	8.55751	10.0323	7.27652	12.6561	11.4813	6.06267	7.85513	3.89114	11.5487	4.97061	10.8348	8.40069	7.30304	5.54988	3.95486	8.52211	7.62272	12.6619	9.52779	5.39901	12.4462	7.79457	10.2009	12.6724	3.26155	6.97742	10.1114	10.27	7.69901	5.38777	7.98333	9.6961	6.27907	12.4128	6.61962	4.19932	6.44618	10.6526	5.14685	9.07021	12.0668	3.89433	5.67157	8.90891	4.39563
590	case	African American	8.37842	5.62504	8.41362	9.69908	6.37358	11.5844	11.1123	7.22076	8.07489	3.19667	10.8084	5.15421	8.18011	8.48854	9.10982	6.14088	4.80135	8.65558	7.68408	12.0985	9.88401	6.05939	10.8994	7.02395	9.36119	12.5754	3.29008	5.22183	8.9959	8.96018	7.38353	5.4478	9.09707	9.61718	6.21992	13.6527	6.80473	4.63697	6.71292	9.54314	5.03751	6.90904	11.7952	2.62223	5.62005	8.69802	4.14047
592	control	African	9.73925	7.3249	8.6938	9.45244	7.4779	11.6635	11.1516	6.65265	8.94799	5.93919	11.394	7.64	9.92231	8.34939	9.45667	5.9212	3.8319	9.04045	7.56517	11.9331	8.57649	7.24526	12.5006	6.89686	10.1865	12.5731	4.15032	7.29673	9.88712	10.0813	7.43639	6.3419	9.56854	9.27751	7.24341	12.9764	6.67194	5.0498	7.13277	11.351	6.28835	8.63299	12.3995	2.87768	5.79226	8.93289	4.16721
593	control	European American	8.13203	5.93504	8.52281	9.79492	6.63767	12.1127	11.2516	6.58989	8.97938	3.95322	11.4268	5.0062	9.64581	7.98991	7.36593	5.00069	3.32884	8.53615	8.18119	12.1354	10.1471	5.98482	11.7443	7.3205	9.76266	12.7257	3.01917	6.52618	8.50074	9.2192	7.50082	5.76507	8.8497	9.0902	5.59566	12.8359	6.85269	3.82015	6.59668	11.8085	5.31292	7.22933	11.9444	3.80725	5.86556	9.17095	4.64645
594	control	European American	7.60997	5.98825	9.13493	9.79882	6.73016	11.6721	11.4785	7.1173	8.94768	3.21654	12.4326	5.47101	11.0239	8.70713	7.15514	4.65905	2.81441	8.48638	7.886	11.9162	9.42802	6.55797	11.2357	6.25636	10.3498	12.4406	3.08196	6.56911	9.32145	9.31522	7.12865	5.42597	8.52488	8.83157	6.1781	12.7458	6.88642	4.2087	6.84259	10.9943	5.458	7.0689	11.6771	3.47874	5.35104	9.07896	4.82915
596	control	European American	8.35027	7.65157	8.53174	9.55371	6.97319	10.9446	10.7539	6.74426	9.90093	4.27218	12.3774	6.53464	11.0951	8.55804	8.80784	4.45543	2.94028	9.03464	7.60797	12.3864	9.11369	6.24281	11.6104	6.64263	9.97614	12.5163	4.22012	6.67218	8.16405	9.35313	7.76504	6.35142	9.82185	9.37054	6.13104	12.9577	7.43742	4.76663	7.8129	11.7802	5.63953	8.18573	12.4682	4.94003	5.74039	9.43021	5.48813
597	case	European American	9.3526	6.85209	8.75398	10.4385	6.76797	11.7866	11.5179	8.31155	9.12446	8.03284	12.9559	5.89748	10.9474	9.38012	8.68084	5.32267	3.37837	9.51147	7.69807	12.3694	10.0081	6.24988	12.262	6.8979	10.5112	12.4824	4.06192	5.77165	9.48618	9.36905	7.46089	5.93424	9.2403	9.70069	6.59509	13.2169	7.05985	5.67911	7.04302	11.6013	5.33143	8.12431	12.2176	3.71955	5.53168	8.99335	4.6784
599	control	African	14.6888	5.87573	9.65745	9.50777	6.84703	12.3266	11.3514	6.1192	8.64762	9.65862	10.5598	5.714	11.1529	8.41427	9.18886	4.83603	4.14399	8.64368	7.5586	12.4078	9.65401	6.73682	12.5837	9.02397	9.71614	12.4089	3.14683	5.98185	9.96218	12.9909	7.78182	5.97586	9.3119	10.3687	6.18615	9.53497	6.77962	5.45358	6.62654	10.7305	5.79392	13.9604	11.7346	3.65398	5.60397	8.94399	3.91273
600	case	African	8.43671	7.67619	10.7937	8.78247	8.18368	12.6441	10.5113	6.42587	9.69579	3.94335	10.7255	6.37516	10.8389	7.69293	8.36882	5.607	4.30248	9.20077	7.69638	12.5602	9.69011	7.89526	12.9321	7.17996	9.36368	12.536	4.0675	4.80198	8.57522	8.67798	8.28754	8.83035	9.99073	10.0854	7.03544	9.55025	7.70885	5.38109	6.99754	11.4064	6.39325	8.75764	12.6713	3.63481	5.96036	9.12781	6.04718
601	case	African	9.36911	5.68593	9.2175	8.04583	6.95633	11.5237	11.3881	6.72589	8.99435	4.01511	10.6487	6.06171	10.6339	8.43734	7.99666	5.29001	4.10523	9.05008	7.75687	11.8028	9.88691	6.73654	13.005	7.26975	9.48447	12.6677	3.32535	6.72932	9.56646	9.76866	7.69816	5.43419	8.37017	10.0461	6.45006	12.5624	7.55662	5.28839	6.33593	10.836	5.98697	8.99384	12.3537	3.01625	6.04481	8.88355	3.86315
602	control	European American	8.06418	6.32469	8.82119	10.4192	6.94498	11.6534	10.8651	7.43766	8.67615	3.24214	12.2634	6.0984	9.56269	9.03527	8.11059	5.12721	3.55277	8.91588	8.04529	11.8963	9.78299	6.40407	10.1173	6.9416	10.138	12.5817	4.26297	6.75202	8.9045	9.71207	7.61949	5.69723	8.46682	9.10368	6.83276	12.9602	6.95431	3.93663	6.38976	10.5489	5.90133	7.91146	12.1337	3.61658	5.64794	9.1211	4.58538
603	case	African American	7.87923	6.45275	8.92901	8.93757	6.49019	10.293	10.9849	6.4245	8.77136	4.82642	10.9197	5.54053	11.174	8.50404	8.34355	4.49219	3.24323	8.8545	7.54286	11.6829	9.43244	7.16777	12.5701	5.6224	9.4486	12.5604	3.44721	5.89202	9.34587	8.98258	7.5006	5.33937	8.79075	8.99504	6.21689	12.6939	7.25553	4.93114	6.50512	11.1581	5.4865	7.25161	12.4396	3.59235	5.69022	8.88647	4.1765
604	control	European American	7.88867	7.02436	8.62239	9.73452	7.03426	11.4412	11.2701	6.57997	9.23927	3.64317	12.1129	5.41087	9.62678	8.56999	8.30962	5.13984	3.25054	8.91325	7.75968	12.0075	9.96109	5.81662	11.185	6.96204	10.0321	12.5847	4.32885	7.36683	8.48445	9.41717	7.52711	5.74361	8.91041	9.43631	6.10685	12.9819	7.36543	4.42168	6.60845	11.3646	5.91883	7.55029	12.1986	4.81824	5.58028	9.14564	5.02376
605	control	European American	7.36526	7.17372	8.98903	8.95515	6.75193	10.5765	10.798	5.98412	9.20599	3.64743	11.9573	6.26997	9.45643	9.16346	8.6387	5.12757	3.20291	9.05359	7.82193	12.0293	9.96515	5.82941	10.0112	5.94214	9.53993	12.6162	4.0808	6.54769	7.76706	8.57557	7.53413	5.43996	9.07416	9.20069	6.3226	12.4716	7.26005	4.39012	6.96083	10.8874	5.65676	7.10623	12.5716	4.3247	5.6552	9.13842	5.12829
606	case	African	13.4435	9.27621	10.5892	6.1074	7.58462	12.4923	10.4215	4.57289	10.4252	6.78262	10.706	7.38022	9.3129	7.64562	10.6271	5.56889	5.98553	10.5256	7.66663	13.6958	11.9441	7.77938	12.4908	7.28022	7.03804	12.3689	5.99351	6.21129	8.68598	9.81323	7.69717	8.69806	10.5995	10.0849	7.73637	10.2209	7.15894	4.86107	7.55784	12.3154	7.71082	9.62022	12.183	5.85868	5.9521	9.57021	7.81349
607	control	European American	14.651	6.18592	8.42034	9.82507	6.8953	12.5426	11.3977	5.41828	8.87911	4.4761	12.6553	5.43882	10.6933	8.33434	7.22662	5.20407	3.48928	8.41729	7.73481	12.7852	9.84402	5.38545	10.8512	8.19363	10.0227	12.6206	3.19873	6.27277	9.24374	9.4429	7.57581	5.3835	8.58336	9.76674	6.30753	12.432	6.40258	4.28587	6.26194	10.7998	5.54689	8.12901	12.1149	3.84425	5.94305	9.08637	4.63359
608	case	African	9.54973	5.62379	10.6368	4.29707	6.53394	11.5609	10.6968	5.35107	7.89776	3.80044	10.4222	4.6904	10.0955	6.4928	8.07958	4.71398	2.63257	8.54831	7.43733	11.5077	8.02217	6.04302	11.8356	5.90241	7.9316	12.2194	3.72445	6.08706	9.22605	8.74619	5.55293	6.29865	8.59952	8.95883	5.32096	9.22306	6.68091	3.98535	5.75209	10.0983	5.96325	7.82474	11.2239	2.80422	5.49051	8.41714	3.2875
609	control	African	8.89668	6.67732	9.05017	9.69481	7.09406	11.8419	11.2219	6.90603	8.90095	3.71538	11.2889	6.41584	10.5233	9.35211	10.0765	4.9512	4.11138	9.40848	8.11852	12.3878	9.97343	8.08319	12.8104	7.21766	10.0074	12.6359	4.1717	6.79281	10.6839	9.7673	7.61666	5.80714	8.95584	9.34342	6.85269	12.8039	7.69241	5.00717	6.92044	11.4225	6.03949	14.4419	12.2817	3.35355	5.6857	9.06513	4.95641
610	case	European American	13.864	6.57867	8.60664	9.4308	6.63653	11.5121	11.0894	6.99512	9.10222	4.53828	13.0589	5.32908	11.2751	8.29682	7.24653	4.87513	3.12028	8.81083	7.50378	12.0047	9.2537	3.93283	10.7283	6.89459	9.70613	12.5203	4.32065	5.98464	6.85326	8.66685	7.32748	5.17695	8.35784	9.06922	5.73158	12.8272	7.1627	4.24421	6.44145	10.595	5.10914	8.59193	11.6659	3.4609	5.48393	9.01865	5.24751
611	case	European American	8.59771	6.42684	8.59981	10.2186	6.49801	11.8259	11.2796	6.37799	8.89105	3.33224	12.4187	4.56475	10.3836	8.9159	8.6145	5.99939	3.67499	8.80113	7.73153	11.8023	9.62514	5.36505	11.4	7.6725	10.139	12.6646	3.67801	6.3853	9.26838	8.31853	7.38727	5.46808	8.65979	10.0076	6.67372	12.7539	7.18577	4.83664	6.81163	11.4136	5.50331	7.31034	12.206	3.6914	5.6387	9.01254	4.55691
612	case	African American	7.58676	5.64617	8.80738	9.49288	6.21011	11.0108	10.9471	6.56512	8.56466	3.01113	10.9642	4.84802	10.7404	8.44078	7.7785	5.03158	2.95197	8.37216	7.79935	11.3582	8.92211	5.87501	12.3655	5.64883	9.41124	12.4851	2.92917	6.27612	8.69326	8.0784	7.42178	4.94833	8.34403	8.81688	5.89082	12.512	7.34332	4.75706	6.462	11.0853	5.1024	7.51816	12.072	3.05961	5.33611	8.55561	4.03622
613	control	African American	10.3039	6.23195	8.70417	10.0634	7.16183	12.4621	11.4867	6.61035	8.61818	3.31911	12.8709	5.1595	10.8667	9.12545	8.03288	5.90391	3.6761	8.19521	7.62566	12.2061	9.48079	6.89048	12.0679	6.96078	10.0296	12.4603	3.41519	6.08247	7.65575	8.9086	7.47618	5.13171	8.47119	9.23418	6.08051	12.5323	6.63795	4.89428	6.32155	10.8762	4.69856	8.01393	12.0454	3.23422	5.57545	8.88249	4.421
614	case	African American	8.38315	6.32115	8.40989	9.77554	6.416	11.9689	11.2736	6.41225	8.87096	3.76119	11.2837	5.11422	10.1723	8.72678	7.11566	4.5817	3.17771	8.82477	7.76036	11.5661	9.22562	4.89606	11.1296	7.21895	9.71616	12.5873	3.75575	6.62556	8.82606	8.7605	7.36281	5.45825	8.66904	9.84007	6.04769	12.6204	7.05314	4.94185	6.40343	10.9294	5.39573	7.07543	12.0457	3.59898	5.42296	8.89575	4.25118
615	case	African	11.6587	6.01175	10.0968	5.91931	6.6785	11.965	10.4266	5.11233	8.27567	4.03825	10.4128	5.17791	10.2209	5.82814	8.89833	5.52407	3.3389	8.78094	7.43848	11.9525	8.11961	8.19425	11.404	6.19962	7.51709	12.1002	3.06618	6.02182	7.66994	8.51489	6.9999	6.48009	9.16833	9.06532	5.97756	9.04869	6.45572	3.9443	6.82746	10.0274	5.40025	7.57867	12.3111	2.39838	5.35925	8.63867	3.85344
616	control	European American	12.1877	7.00589	8.23488	9.90284	6.59267	11.8242	11.3063	6.10923	9.5276	5.26064	12.7117	5.21551	11.6509	8.46825	9.95468	6.05967	3.86218	9.267	7.34718	12.5076	9.70819	6.59522	11.0047	6.622	9.96997	12.5377	3.92874	6.97042	9.40993	10.7851	7.7808	5.79229	9.31682	9.77478	6.68991	12.8641	6.88967	4.71387	7.06041	11.4778	5.87856	10.1339	12.6076	4.44322	6.11963	9.14193	4.88334
617	control	African American	7.22628	6.99328	8.24117	8.16143	6.89782	10.026	11.1608	6.99726	9.68067	7.06993	11.983	5.23144	11.0972	8.92395	10.3067	5.27127	2.98006	8.69736	7.77786	11.7063	9.57705	4.75314	12.3222	4.99045	9.4861	12.577	4.08307	7.07032	10.4465	8.26098	7.7049	5.70834	9.65959	9.38266	5.80441	12.571	7.53253	5.09789	7.15528	11.8158	5.35127	7.43685	12.4885	4.36247	6.52397	9.50997	5.07819
619	case	European American	9.35838	6.74161	8.9406	6.35602	7.26891	10.9238	11.2067	7.58581	8.92275	3.82583	11.8634	5.88173	10.3217	8.43009	8.91654	4.83152	3.8725	9.31224	8.20429	11.6495	10.2548	6.2716	10.2066	6.1636	10.1525	12.7173	3.41875	6.85076	9.33693	9.09736	7.54667	5.62266	8.67685	9.40764	6.44454	13.0787	6.68551	4.21975	6.76666	11.1791	5.66941	7.34951	11.7514	4.11695	5.65148	9.19666	4.7182
621	control	African	11.2141	7.42985	9.22601	10.252	8.53073	12.1814	10.6797	6.53162	8.8674	5.49644	11.3092	7.57216	10.6654	9.15252	9.58541	5.80886	5.48737	9.31395	7.71346	12.4038	11.1022	11.691	12.2313	7.73883	10.0352	12.4437	4.76635	7.23697	9.48743	12.6096	7.58991	5.93073	9.28825	9.5721	8.61233	13.6486	6.93979	5.28792	6.89952	12.455	6.95388	11.6206	11.6466	3.79921	5.50802	8.99371	4.80071
622	case	European American	6.82587	6.56289	8.63465	10.3037	6.81305	11.8725	11.4717	7.11881	9.1152	3.65435	12.291	6.32408	10.2658	8.68997	8.28878	4.79645	3.31269	8.86668	7.83733	12.1411	10.0688	4.98159	11.0035	6.50608	9.86199	12.6704	4.10452	6.8256	9.53528	8.6094	7.66446	5.35191	9.15779	9.42189	6.35408	12.3715	7.19727	4.69504	6.56332	12.0608	5.82456	6.10946	12.0563	3.87849	5.68127	9.33312	4.79781
624	case	African	10.2073	6.37254	8.77192	8.94612	6.855	12.6464	11.3707	5.65613	8.66086	4.47181	11.3363	6.28611	10.649	8.1632	8.43838	5.29805	3.81406	8.95283	7.68466	12.4066	10.2047	6.36419	12.8207	8.44719	10.1307	12.7012	4.00291	6.71763	10.0245	9.91359	7.75438	5.50266	9.2012	9.73727	7.16561	10.485	7.44158	5.60355	6.46865	10.4495	5.98859	8.59515	12.4766	3.57715	5.65388	8.90407	4.33784
625	case	African	8.70946	6.39738	10.7768	7.50629	6.39642	12.5541	10.7065	4.45494	8.99852	4.01293	9.97879	4.48868	8.50305	5.8701	8.38868	5.83815	2.04834	8.72697	7.12781	12.0589	8.01264	4.78101	9.34248	6.24804	6.0903	11.5488	3.54764	4.08895	7.88448	5.93066	4.77169	5.6761	9.17317	9.3525	5.98484	9.38514	5.23024	4.17167	6.09817	10.5394	4.62724	4.65191	9.65109	2.66132	5.22786	8.36096	4.24626
626	control	African	9.85227	5.85331	8.81872	9.6957	6.90911	11.7308	11.3663	6.40767	8.51148	4.30005	11.0655	5.72591	10.4376	7.68202	8.27896	5.18606	3.0563	7.77613	7.52698	11.8533	8.84581	6.71568	12.4237	7.77428	9.70561	12.6619	3.20597	6.32571	9.52566	10.2008	7.38882	5.70575	8.84092	9.11468	6.01764	9.90886	8.09079	4.96219	6.06269	10.132	5.33243	10.029	11.8478	2.84456	5.81485	8.73374	4.15587
627	case	African	11.6882	5.82698	10.0671	7.20116	6.96124	12.384	10.7031	5.73119	8.35683	4.45548	10.1831	5.23564	9.97022	7.64029	7.68041	5.71346	2.95831	8.96103	7.47634	12.1448	8.71413	5.63588	11.45	7.14196	8.05648	12.2378	3.3939	4.87898	8.47444	9.95848	7.30693	6.55125	8.24007	9.33429	6.20444	9.17808	6.09568	5.06283	6.18458	10.2627	5.40905	8.79714	12.1054	2.67593	6.20792	8.75802	3.76532
628	control	European American	8.87036	6.46752	8.45936	9.53215	6.8943	11.7609	11.3124	5.9449	8.79625	3.68822	12.1691	5.54241	9.67516	8.68045	8.15612	4.98378	3.49518	9.04045	7.681	12.096	10.0875	7.59123	10.371	7.15334	9.58602	12.691	3.5964	6.52922	7.91871	8.69026	7.51187	5.37689	8.73991	9.61816	6.73321	12.7852	6.63503	4.33655	6.99694	10.6537	5.31269	6.88897	11.939	3.8683	5.63925	9.09772	4.60723
629	case	African American	7.27375	6.51503	8.67626	8.74154	6.54341	10.2661	10.8899	6.9951	8.44406	4.41042	11.7681	5.13411	10.4388	8.37113	8.53977	4.27358	3.1949	8.57782	7.94112	11.7838	9.80609	5.48902	11.6957	6.25073	9.94865	12.5605	7.45565	6.48307	8.9194	8.45485	7.07753	5.18158	8.49983	9.27053	5.96124	12.7825	6.35679	4.39402	6.74988	11.0512	5.0159	6.64591	12.329	3.15469	5.38316	8.39967	4.22424
630	control	African	6.41033	6.4839	8.56893	8.22217	6.57085	10.6092	10.7877	6.88339	8.8193	4.04815	10.9226	6.33766	9.66472	8.6744	9.14786	5.74852	3.19333	8.71816	7.26032	11.4395	9.56588	7.10828	11.8219	5.60058	9.70522	12.4495	3.31505	6.43998	8.86827	8.90646	7.22288	5.90596	8.87915	8.65768	6.39525	10.2802	7.4896	4.46323	6.19674	10.3717	5.75806	8.15186	11.9683	3.39294	5.32923	8.87811	4.07943
631	control	European American	7.09034	6.09338	8.81628	8.86731	6.64522	10.9172	11.1448	6.71934	8.78042	3.23547	12.3421	4.81636	10.0969	8.58353	7.60468	5.05926	3.82056	8.57596	7.9396	11.6537	9.09373	4.75581	10.5436	6.89743	10.1785	12.5519	3.3774	6.46466	8.81831	8.82612	7.19503	5.54879	8.23008	9.49467	5.80522	12.6578	7.02443	4.46493	6.52288	11.1135	5.03962	6.80005	11.7719	3.5538	5.59599	9.1761	4.60044
632	control	European American	8.85727	6.76817	8.3429	10.0702	6.39986	11.5862	11.2928	5.76492	9.48525	4.30938	12.4395	5.04287	9.08069	8.26867	10.0101	5.14296	4.11003	9.11784	7.4629	11.9877	10.0479	5.0426	10.6046	7.32766	10.1984	12.6258	3.85825	7.12579	8.87206	9.65755	7.80168	5.84391	9.08908	9.82771	6.05217	13.4792	7.50667	4.94843	6.95315	11.1979	5.39873	7.56984	12.3745	3.96233	5.65664	9.35763	5.10892
633	control	European American	9.92195	6.69692	8.43258	10.3761	6.73047	12.1271	11.6305	7.12768	9.34236	4.31781	12.5448	4.8221	10.6275	9.15116	8.18396	6.04224	3.433	8.89655	7.79744	11.5494	10.4837	5.2516	11.1999	7.59043	10.2932	12.7506	3.68347	7.01714	9.26822	9.13724	7.44203	5.82181	8.91644	10.2346	6.4898	13.5182	6.89026	5.22709	6.60856	11.0911	5.63372	7.74783	12.028	3.82376	5.76109	9.19144	4.87064
634	control	African	14.3856	6.20836	9.04333	10.3325	7.14729	12.2861	11.5123	6.84625	8.92681	9.87925	12.1874	6.24315	10.5322	8.21277	8.92898	5.78362	3.35434	9.59256	8.256	12.117	10.3914	8.08529	12.8043	7.20638	10.1677	12.7028	3.75631	7.1842	10.4412	13.1698	7.62801	6.26446	9.26474	9.1727	6.53068	11.9094	7.77064	5.39463	6.80766	10.8813	6.07628	13.846	11.8485	4.00197	5.79727	9.45622	4.9058
635	case	European American	7.4477	6.7014	8.23408	6.97685	6.07911	9.54804	10.7492	7.28798	8.81225	4.42417	12.756	5.27731	10.6424	8.55187	8.13501	4.35343	3.36564	8.91616	7.63743	11.4457	9.57934	4.57121	11	5.38251	9.62487	12.428	3.143	6.31504	7.58462	7.88527	7.49353	5.69174	8.71517	8.85254	5.76185	12.6585	7.44566	4.49739	6.86798	11.6752	4.84667	6.13762	11.92	4.18733	5.51388	9.09349	5.92353
636	control	European American	7.03105	6.97239	8.35594	8.56454	6.3538	9.83577	11.2213	7.16749	9.47123	3.67732	12.0877	5.67073	9.94856	8.21339	8.80802	4.91865	4.10536	9.04859	7.6634	12.055	9.34945	5.89532	10.3748	6.22774	10.1871	12.5049	4.3016	6.41402	8.39839	8.17675	7.63408	5.8375	9.42752	9.02716	6.77032	12.691	7.41909	4.58123	7.30303	11.8311	5.714	6.51278	12.4267	4.2719	5.80764	9.16212	5.27968
637	control	African American	6.20874	6.18481	8.28914	9.87523	6.37768	11.2642	11.3912	6.66189	8.75623	3.90677	11.3922	3.88783	10.8012	8.72506	7.64053	4.64053	3.05728	8.35599	7.74603	11.5425	9.37372	4.88303	11.9235	6.02479	9.23375	12.536	3.10453	6.71924	9.55962	9.90967	7.50594	5.40005	8.84911	9.12604	5.84889	12.763	7.04495	5.02518	6.65901	10.2036	5.14109	14.1011	11.7843	3.65075	5.32584	8.98124	4.44263
638	control	European American	8.24507	6.48801	8.39745	10.2027	6.59011	11.7959	11.3617	6.78027	9.43037	10.8194	12.4004	5.81955	10.3949	8.68815	8.67539	4.35003	2.96638	8.77848	7.56029	12.2255	9.50274	6.50075	10.8378	7.26723	9.57141	12.6118	3.5999	6.39586	8.74539	11.3747	6.91451	5.73788	9.30692	9.94172	6.13231	14.0185	7.31166	3.76334	6.95333	12.3036	5.6143	8.38007	12.4031	4.15948	5.764	9.33471	5.16735
639	case	African	14.6297	6.80148	10.7377	5.0826	7.06266	12.5953	10.781	6.45536	8.56239	7.83126	13.6239	5.46903	10.6873	7.20905	9.25273	5.29342	2.49698	9.40656	7.14057	12.4511	8.60508	10.0611	11.6348	8.37034	7.62456	12.1362	3.82772	6.93431	8.78937	11.2599	5.43927	6.30471	9.16408	10.0663	7.23916	9.81103	6.57176	4.83545	6.76063	9.31833	6.19989	12.0196	12.4665	3.7028	5.65371	9.09322	4.43868
640	control	African	11.2811	6.96289	8.75369	8.40175	7.27532	11.6822	10.8984	5.11011	8.70213	3.69921	11.1289	7.53885	10.2282	8.64491	8.9409	4.82911	3.64313	8.89354	7.86928	11.9936	9.49887	6.9345	12.1129	7.21896	10.0337	12.5208	4.26843	7.31983	8.86972	10.209	7.44725	5.7351	9.15073	8.95448	6.89783	10.2824	7.26852	5.11565	6.73501	10.6989	5.86924	8.84302	11.6093	3.18374	5.55594	8.90672	4.43524
641	case	African	9.89503	7.77555	9.03997	6.01979	7.60142	11.467	10.552	5.78034	9.28715	4.65758	11.3995	6.93021	10.6199	8.03909	10.6677	5.31551	4.17617	9.40587	8.0417	12.857	9.88995	8.68813	11.9737	7.00454	9.80852	12.621	4.67353	7.42172	9.61054	9.84675	8.06426	5.80877	10.458	9.44042	7.19825	11.893	8.22412	5.00281	8.11761	11.1892	8.28789	9.91791	12.6817	5.03557	5.81418	9.52226	5.41495
642	case	African	10.0935	5.88493	10.9893	9.59382	6.67369	12.6686	11.0363	5.54152	8.07776	3.95251	9.8663	3.63636	9.19299	6.25325	8.33115	5.10687	2.5503	9.04395	7.21268	11.918	8.07302	4.05517	10.4004	6.7907	6.75215	11.5692	2.86163	3.99146	7.37128	8.4548	4.86178	5.75843	8.95993	9.35741	5.77809	9.01551	4.77823	4.07647	6.25288	9.37893	5.00859	4.79791	10.0172	3.28356	4.30668	8.07972	3.47978
643	case	European American	6.5317	7.05803	8.32645	9.60363	6.77204	10.9171	10.6677	7.05395	9.48256	3.88202	12.9466	5.80916	10.7617	8.50999	8.70219	4.33538	3.95889	9.44629	7.83825	12.1822	10.364	5.23608	10.2763	5.76028	9.93801	12.2444	3.68467	6.82383	8.9219	9.1798	7.67707	5.85178	8.9529	8.7647	5.59493	12.9875	7.38165	4.10949	7.44867	12.2404	5.59726	8.27352	12.4235	4.95275	5.5794	9.45651	5.58741
644	case	African American	6.73198	6.56667	8.47762	9.3466	6.4914	10.7888	11.2677	7.02254	9.17113	3.81445	11.8087	5.04446	9.52788	8.98383	7.63152	4.87538	4.51397	9.00155	7.6051	11.7001	8.97585	6.20993	11.6798	6.29191	9.63298	12.5155	3.71609	6.54357	8.34775	8.77057	7.74079	5.73432	8.98861	9.68555	5.81008	12.4163	7.39037	5.12962	7.13622	11.1492	5.54359	7.67024	12.2562	3.55857	5.47	9.14244	4.6874
645	case	European American	14.801	6.87848	8.6421	10.1719	7.24764	12.5621	11.4016	6.36847	9.02221	5.75683	13.6348	6.37016	10.1497	9.1848	8.14605	4.71396	3.91749	8.90223	8.06536	12.7239	10.4741	7.12054	11.6401	9.48192	10.4022	12.6739	3.17855	7.21953	6.58837	10.9975	8.00327	5.03696	8.68167	10.4945	6.301	13.1059	7.23757	5.27319	6.67919	10.5791	5.26978	10.1308	11.5502	4.15012	5.67927	9.30982	4.68075
646	case	European American	12.883	7.21201	8.56934	9.11364	6.63258	11.3229	10.5134	5.24822	9.50565	3.85853	12.4241	5.96417	9.9528	8.25923	10.1348	4.87068	3.66019	8.85141	7.38956	12.2277	9.75668	6.26231	9.83188	6.71797	9.97993	12.4682	4.41064	7.00562	7.50375	9.53502	7.70021	5.60728	9.06029	9.4796	6.36898	13.0598	7.21002	4.22323	7.23153	11.0551	5.64872	7.78853	12.2661	4.27667	6.93773	9.39853	5.39694
647	control	European American	8.77786	6.21547	8.49112	9.46632	6.40019	10.978	11.2346	6.62822	8.8874	3.39024	12.6539	6.01892	10.9234	8.99017	8.45309	4.85639	6.01144	9.40851	7.96969	11.7574	9.96692	7.47568	10.6023	6.82022	10.4214	12.6293	3.62896	6.47523	8.41079	8.70688	7.57542	5.47702	8.54159	9.17912	6.32008	13.1295	7.1671	4.64823	6.76258	10.9033	5.61766	6.56927	11.9453	3.33902	5.73963	9.08515	4.51969
648	control	African	9.96276	6.38791	9.54588	10.0902	7.4625	12.3959	11.2792	6.82698	8.94808	4.5699	11.3378	5.73519	10.5129	7.68476	9.05949	6.70105	4.32368	9.3011	7.93632	12.9885	10.3046	7.43256	11.9749	6.87656	9.34571	12.6906	4.17489	6.18765	9.64203	10.8905	7.82686	5.84884	9.83262	9.45998	6.61401	11.1178	7.63089	5.10322	6.96815	11.014	6.42408	9.19995	12.4342	3.58453	5.47196	9.22793	4.12634
649	control	African American	8.11768	5.61985	8.59474	6.66966	6.12159	7.82318	10.6806	6.90496	8.44823	4.02983	11.1576	5.18925	9.89357	8.88114	8.20137	5.39182	4.19203	8.55395	7.81841	11.0433	10.1676	5.29459	12.1771	5.00507	9.59785	12.3937	2.7654	6.78053	8.2871	8.12623	7.27807	5.01543	8.57126	8.90465	5.71062	13.0857	6.95699	5.05772	6.3291	10.9909	5.05297	6.43802	11.7092	2.96995	5.62758	8.80838	4.09513
650	case	African	14.4215	6.06945	10.7328	6.94646	7.35354	12.9746	10.9235	5.1703	8.50047	13.8528	14.5731	4.42465	10.1312	7.29399	7.67953	5.37572	3.20108	9.52477	7.47215	12.5714	9.25185	6.18702	12.4344	8.88635	8.39339	12.5023	3.69656	6.41492	9.35737	14.079	7.35058	6.55162	8.59309	9.95909	5.90886	9.55676	6.37427	4.89538	6.12189	10.5503	6.42292	14.3005	12.1479	3.48231	6.08592	8.93487	4.04103
651	control	African American	7.00481	6.55431	8.54801	9.48002	6.60353	10.9393	11.394	8.37796	9.13725	3.35704	11.6901	4.6835	11.0518	8.81464	7.29538	5.54228	3.96976	8.88394	7.92585	11.3462	9.44547	5.0062	12.1844	5.48276	10.2192	12.6271	3.49111	6.20579	8.95647	9.20033	7.64725	5.46982	8.82404	8.9056	5.92798	13.3424	7.67013	4.71599	7.06067	11.1363	5.6244	6.22296	12.1627	3.69894	6.03539	9.45027	4.41824
653	control	African American	14.2501	5.89163	8.78183	9.79671	6.7697	12.4252	11.1857	5.44648	8.51206	4.37864	11.5195	4.89866	11.8625	8.42434	7.63441	4.57224	3.35489	8.46338	7.87463	12.3484	9.53718	8.40966	11.7939	7.55067	9.7469	12.6114	3.15656	6.62256	9.4845	9.72681	7.40671	5.29966	7.99963	9.06133	7.22338	12.6922	6.68615	4.49442	6.78385	10.442	5.43309	8.42388	12.119	3.00832	5.52683	8.51219	3.77368
654	case	African	8.42976	5.8184	10.9505	7.70423	6.04641	12.5866	10.6954	3.51883	8.0349	2.87327	9.40168	4.28203	8.03324	5.8912	6.64761	4.69379	2.12475	8.73592	6.93888	11.6077	7.81318	5.45334	7.48662	6.94641	6.61088	11.3827	3.65742	4.13838	6.8138	6.93572	4.07101	6.01344	8.648	8.66873	6.43933	8.85416	4.78429	4.65424	5.52911	9.11556	5.3813	3.14078	9.37765	2.72146	4.55003	8.44617	4.06367
655	case	African	10.5102	5.77909	10.7649	6.57545	6.69386	11.9263	10.8423	5.86801	8.00322	3.56063	10.0532	4.09582	10.0001	6.59094	7.45685	4.59374	3.71349	10.0524	7.04777	11.4777	8.41477	7.605	11.2187	7.422	6.99128	11.7431	3.95199	4.61423	8.67353	9.33099	6.68833	5.7469	8.90716	9.21373	6.26913	8.71666	6.47906	4.3364	6.07218	9.95095	5.59525	12.0106	11.6852	3.09349	5.58997	8.23199	3.94359
656	control	European American	7.08445	6.91205	8.29862	9.30199	6.60596	10.6146	10.9407	6.1384	9.18991	4.89953	12.2785	4.94742	8.78131	8.50856	9.33909	5.55629	3.60487	9.05948	7.39774	11.9264	10.6618	5.53676	10.5031	6.47282	9.66765	12.6242	3.59347	6.92871	8.34542	8.99423	7.57854	5.56345	8.83185	9.654	6.05371	12.7371	6.95956	4.08001	7.09066	11.3487	5.51836	7.29621	12.3416	4.2912	5.60496	9.16545	4.94995
657	case	African American	7.9575	6.433	8.91888	10.5642	6.43863	11.6927	11.4735	7.3067	9.13466	5.24092	11.2036	6.4605	11.266	8.81359	7.77225	5.91673	3.11858	8.88879	7.90668	12.1694	9.8326	5.42064	12.3953	7.97326	9.46007	12.5049	3.67925	6.51299	9.60725	9.03061	7.64222	5.96549	8.67443	10.4179	6.75328	12.1851	7.28008	4.2954	7.25502	11.3601	5.63849	7.86367	12.0855	4.22538	5.72829	8.95273	4.60875
658	control	African	11.508	6.46998	8.7197	9.1423	7.16622	12.1666	11.0307	5.53168	8.9982	4.63667	11.0254	6.00231	10.3261	8.39759	8.04231	7.39914	3.17931	8.23375	7.31453	11.9148	8.16455	7.78452	11.8572	6.632	9.71713	12.6025	4.17207	6.66415	8.96334	10.9175	7.62964	5.82017	9.46193	8.93141	6.2921	12.3865	7.2951	4.72978	6.7788	10.7594	5.59818	10.3096	12.0735	3.46995	5.79464	9.04924	4.61978
659	case	African	14.4756	6.77114	10.8432	6.81369	6.62367	12.216	11.0491	5.65578	8.33298	7.6789	11.714	4.32503	7.71868	7.00364	9.34366	4.56415	4.54013	10.0002	7.01663	12.1629	9.1699	5.44676	11.5577	8.20876	7.82712	12.1896	3.98636	5.38179	8.81056	7.42503	6.26279	6.78913	8.99255	10.1531	6.08235	9.33986	6.83816	3.53236	5.91454	11.0055	6.00085	9.33959	10.635	3.18025	5.33826	8.02251	4.51222
660	control	African	10.1151	6.42534	8.51973	10.0328	6.63056	12.1981	11.3823	6.21467	8.66768	4.27067	10.87	5.24709	11.0691	8.56898	8.68006	5.93778	3.98634	8.50476	7.63264	12.4748	9.30399	6.81965	12.1337	7.07226	9.4138	12.5627	3.77634	6.91186	8.80236	10.3597	7.3478	6.4066	8.62213	9.30046	6.87099	12.7637	7.16126	4.94187	6.68318	10.1886	5.61996	9.1387	12.3833	3.01645	5.61983	8.91024	4.38186
661	case	African	14.9676	7.25802	9.08725	7.50313	7.46554	12.5638	11.3824	6.41671	9.58164	7.31528	14.1423	5.88967	9.94439	8.56528	10.4168	5.16136	4.91009	9.99724	8.06453	12.9549	9.94818	12.0193	12.8851	8.97011	9.97503	12.6537	4.44739	6.61669	9.45181	11.8979	7.86142	6.18332	9.89222	10.11	6.96012	11.9608	6.98523	5.2913	7.13377	11.3265	6.3726	12.2169	12.6107	4.03009	5.40826	9.344	5.10497
662	control	European American	13.6784	6.63562	8.65782	9.94658	6.85335	12.0486	11.3444	6.61445	9.02587	4.08787	12.4941	5.95454	10.6463	8.90147	8.3454	4.85356	3.48584	8.86759	8.07511	12.2031	10.344	5.85298	10.9702	7.89443	10.1606	12.7212	3.91688	7.51741	8.82128	10.1251	7.53664	5.6583	8.69598	9.77616	6.44285	12.9427	7.03418	4.55782	6.50655	11.3479	5.57779	9.06197	11.7878	4.06236	5.50524	9.09121	4.79129
663	case	European American	6.80349	6.29418	8.74215	8.76587	6.59605	9.74688	11.2912	6.80228	8.71298	4.28953	12.1097	5.27116	9.06666	8.51248	7.73837	4.98568	3.62573	8.71723	8.12343	11.358	9.2887	5.01989	10.086	5.65011	10.2727	12.6079	3.70172	6.33557	7.97746	8.96506	7.41079	5.38133	8.05406	9.53041	6.24425	12.9214	6.94434	4.82018	6.30305	10.9183	5.35981	6.61984	12.0924	3.85835	5.69057	8.94534	5.0537
664	case	African	14.1607	6.36237	10.6386	7.51361	7.32069	12.9265	11.1204	4.84775	8.60015	5.82286	10.8862	3.89772	10.3539	7.55492	7.68129	3.98557	2.44562	9.36501	7.64786	12.4066	8.96691	5.22034	11.6992	8.04137	7.4933	12.2071	3.20387	5.72505	8.80341	10.8837	7.39817	6.60713	8.69559	9.79735	6.00253	9.73512	6.22353	3.98829	6.16918	9.62624	5.74187	10.1837	11.4969	4.06202	5.56815	8.73403	4.19219
665	control	African	8.66369	6.72872	8.58614	9.75459	7.43838	11.8094	11.2239	6.78531	8.69085	3.78177	10.8356	6.64808	11.0087	8.42882	8.62988	5.22244	3.90689	8.86897	7.91417	12.1944	9.99522	8.02626	12.9349	6.01357	10.11	12.5151	4.36187	6.18931	9.47784	11.3268	7.72961	5.70059	9.65099	9.02462	6.6128	12.0899	6.61171	5.38286	6.5919	11.3454	5.94487	13.9918	12.2389	3.39893	5.6488	8.88351	4.71388
666	control	European American	9.00715	6.58479	8.86695	9.86376	6.90707	10.9959	11.2634	6.5659	8.96637	7.12597	12.3777	6.03341	10.2798	8.30947	7.93441	4.91865	3.85404	9.13092	7.8494	11.8406	11.3712	4.9207	11.2531	6.96648	9.89065	12.5326	4.07279	6.39622	8.61261	9.10456	7.45084	5.5003	8.63102	10.2611	5.83401	14.0936	7.00918	4.23495	7.00243	11.9371	5.95156	7.48166	12.1887	3.92945	5.92243	9.28509	5.44574
667	control	European American	8.8941	6.53355	8.72095	10.0479	6.95165	11.7164	11.1377	6.60794	8.70507	2.69222	12.0179	5.74705	9.79227	8.80291	8.36117	5.49973	3.71043	8.64228	7.79147	12.1232	9.67142	6.99355	10.6032	6.86157	9.80273	12.57	3.84462	6.40159	8.77965	10.2727	7.45908	5.51994	8.36813	8.74837	6.27712	12.7069	6.93561	4.26321	6.71245	11.0984	5.6239	7.78166	12.2218	3.45133	5.52287	9.05801	4.50725
668	control	African	9.90661	6.98021	8.51393	7.38947	7.34512	9.65158	10.8896	6.91576	8.62154	3.79172	10.9649	7.16672	9.4063	8.56928	9.02707	5.32109	3.69261	8.37065	7.45822	11.3635	9.72591	9.30496	12.2571	5.57146	9.47592	12.1786	4.20896	6.65478	8.93464	10.7494	7.15141	5.72303	8.82003	8.67252	6.93045	10.8275	7.34781	5.84622	6.53466	10.2722	5.84461	8.76699	12.0903	3.15394	5.62498	8.89922	4.43014
669	control	African	12.702	6.03989	9.0711	10.1884	7.30193	12.0561	11.5074	7.25115	8.90116	7.25777	11.0254	6.53369	11.041	7.94953	9.40419	5.15446	3.93213	8.61879	8.19804	12.3207	10.1007	7.03936	12.375	7.52097	9.85837	12.6511	3.37096	6.50554	9.78093	11.2239	7.60182	5.95979	9.11769	9.27294	6.45981	11.6796	7.44805	4.9766	6.93694	10.3672	5.48629	11.5866	11.8244	3.35648	5.35815	8.88359	4.07659
670	control	African	11.6311	6.2117	8.79108	10.0051	7.26938	12.6054	11.3249	6.42924	8.8237	4.342	10.8602	5.50485	11.1726	8.36602	9.20811	5.2723	4.32948	8.88409	7.79977	12.2088	10.0269	7.76315	11.9077	7.79543	9.8101	12.6336	4.14016	7.05665	9.78054	10.7552	7.74711	6.0714	8.79872	9.46043	7.04171	12.3938	6.9504	5.2942	6.83202	11.0669	5.7946	13.9856	12.4884	3.27517	5.64312	8.75357	4.11481
671	case	African American	6.83742	5.67963	8.21999	9.7794	6.16937	11.6941	10.9122	5.89516	8.13048	4.22495	10.5429	4.33611	9.22519	8.60671	8.24483	5.04382	3.02338	8.34673	7.90807	11.6439	8.70488	6.02307	11.8489	7.09494	9.36082	12.5239	4.59094	6.27579	9.48754	8.22815	7.06517	4.9261	7.85726	9.29214	5.87762	12.5035	6.41292	4.79912	6.45504	10.3689	4.8957	7.17672	11.8328	2.71263	5.3697	8.26082	3.85155
672	case	European American	8.65972	6.62848	8.6945	9.53707	6.52805	11.1828	10.5243	5.8878	8.92526	4.01929	12.4437	5.11347	11.1791	8.62285	9.3789	5.11082	3.08199	9.30119	7.77873	12.1935	9.94757	6.02409	11.0881	7.52678	9.64403	12.484	4.1069	6.35016	6.2599	9.28519	7.38384	5.65915	8.58191	9.93179	6.01053	13.07	6.93383	5.0193	6.68649	11.262	5.7475	7.94783	11.9769	3.60978	5.61179	9.29007	4.90254
674	case	African	12.1314	6.2574	10.5986	8.10819	6.67489	12.8598	10.867	5.08177	8.23742	4.77387	9.71168	4.06847	8.71695	6.65668	7.52794	5.30792	4.46277	9.08977	7.38713	12.6933	7.69797	6.04436	10.4543	7.92558	7.23638	12.0212	2.95381	3.80151	7.37307	9.22409	6.56764	5.59416	8.4677	10.0987	6.00804	9.61808	6.62998	4.21172	6.40911	10.1844	5.31479	6.47613	11.4222	2.36899	5.20697	8.28301	3.81077
675	control	African American	7.48704	7.70583	8.57105	9.80494	6.72426	11.4579	10.9276	6.14082	9.76844	4.75801	11.5561	5.86516	9.61856	8.74971	8.60091	5.77963	3.7776	9.63508	8.00382	12.4001	10.0667	6.42887	11.3363	6.1056	9.77881	12.3781	4.32423	7.11653	9.17221	8.96088	7.92342	6.38682	10.2632	9.29599	6.37577	13.3325	7.81041	4.554	7.4171	11.5783	6.15859	8.31185	12.3887	5.1796	6.06784	9.44547	5.63191
676	control	European American	7.90931	6.33688	8.81676	9.4313	6.50001	10.8916	11.2676	6.37761	9.0275	3.93195	12.5136	4.39903	10.7714	8.7678	7.77005	5.7977	3.682	8.86131	7.76111	11.6827	9.34835	4.53954	10.9178	6.72177	9.56018	12.5282	5.18224	6.94434	9.15143	9.10937	7.46985	5.32727	8.6262	9.37643	5.71743	12.6214	6.83241	3.79392	6.50111	10.9102	5.34346	6.95672	11.9219	4.1855	5.67266	9.15861	4.68191
677	control	European American	7.60759	6.99383	8.65005	9.34133	6.7209	10.7345	10.7129	5.92261	9.18938	3.62996	12.0934	6.23322	9.9752	8.88824	9.70225	5.22378	3.36283	8.78133	7.6817	11.801	10.0291	7.27465	10.5036	6.53809	9.63534	12.5396	4.11548	6.67592	7.92884	8.35438	7.50007	5.4433	8.75891	9.3972	6.83721	12.6871	7.19323	4.62786	7.31841	10.6729	5.81959	6.58908	11.9525	3.85002	5.48281	9.15485	4.92008
678	control	African American	7.30742	5.7671	8.08906	8.85779	6.87569	10.3678	11.3293	6.60371	8.8054	3.06314	11.2352	5.14002	10.5938	8.70137	7.12322	5.21058	3.05414	8.34947	7.60806	11.3614	9.64522	5.53101	12.7332	4.95898	9.89546	12.5105	2.83629	6.35931	9.01584	8.25066	7.13172	5.09056	8.72551	8.75059	5.86459	12.7306	7.22228	4.49929	6.89641	10.059	4.97706	6.95658	12.1128	3.25888	5.50002	9.09096	3.96641
679	control	African	9.13983	5.79893	8.47987	9.6059	7.11622	11.9946	10.8986	5.31125	8.90345	3.49134	11.2838	5.64279	10.9202	8.24842	7.80323	5.43696	3.03953	8.55321	7.88217	11.9366	9.90295	7.7377	11.9285	6.11361	9.41568	12.3646	3.4836	6.55653	9.33316	9.70834	7.46818	6.40051	9.07691	8.86493	6.43781	12.642	7.18022	5.01899	6.85633	10.3363	5.46754	8.30956	12.444	3.50194	5.62697	9.10447	3.90284
680	control	African	6.91124	5.84099	8.79083	9.66418	6.69138	12.0142	10.9807	7.14948	8.41376	3.11818	10.9439	5.6898	11.5192	8.44327	8.76897	5.47624	3.51317	8.55574	7.98739	12.0288	9.59432	6.22704	12.3592	6.17104	10.4975	12.6284	3.41416	6.03512	10.4454	9.23956	7.24464	5.55733	7.85139	8.7056	6.45148	11.4461	7.12944	4.7875	6.12801	9.85942	5.64546	7.04357	12.1428	2.92894	5.56146	8.74808	3.8988
681	control	European American	15.0543	8.21473	8.62213	9.64764	7.07174	12.2115	11.4415	6.26132	9.95264	4.93535	13.8322	5.21991	10.0826	8.85414	9.29025	6.02301	4.52661	9.91492	6.87803	12.9679	10.6481	6.29737	11.572	8.88182	10.2673	12.8426	4.46163	7.36948	8.07543	10.4299	8.18013	6.05898	9.75898	10.6104	6.52257	12.8383	6.96452	5.10215	7.71761	11.7358	6.53544	9.52235	12.5968	5.70642	5.90779	9.65463	5.9398
682	control	African American	6.10742	6.4158	8.21699	8.31994	6.28738	10.5945	11.147	6.30918	8.65839	4.27448	12.0153	5.22413	9.65338	8.78059	7.44997	5.45898	3.25443	8.76775	7.6898	11.4913	8.83776	6.14021	11.4077	6.44188	10.0458	12.5724	3.64222	6.71226	8.71199	8.54192	7.21624	5.29404	8.64639	9.43182	5.78031	12.3473	6.46238	4.69276	6.15471	10.6508	5.38886	6.11705	11.8869	3.57784	5.3837	8.74366	4.28252
683	case	African	14.8353	6.33549	10.6152	6.51362	6.84677	12.1985	10.9641	5.41253	8.55761	13.0555	11.9664	5.26277	10.2474	7.09363	8.28644	4.88614	3.11266	9.10802	7.76096	12.2049	9.10951	7.12143	12.4161	8.70227	8.11234	12.5757	3.45254	6.51198	9.36007	14.0776	7.48449	5.52301	8.11516	10.1259	6.07382	10.4925	6.84096	4.90511	6.41093	9.82745	5.47982	14.3953	12.5429	3.28126	5.78837	8.73088	3.99723
684	control	European American	10.2126	6.52202	8.62295	10.0804	6.36306	11.5462	11.2865	6.56262	8.76543	4.89258	12.1372	5.06545	9.61832	8.82954	8.57626	4.56649	3.65597	9.21271	7.60181	12.1203	9.61383	5.73445	10.8301	7.12132	9.54031	12.4882	3.37131	6.57742	8.42659	9.26047	7.7757	5.3612	8.32991	9.53355	6.00946	13.4106	7.04881	4.36062	7.1831	11.3118	5.15951	8.54074	11.8295	4.0384	5.68768	8.50523	4.70576
685	control	African	13.0187	6.76492	8.83462	9.49511	7.64848	12.1994	11.2641	6.16805	8.86024	6.45497	12.2254	6.0214	9.34783	8.49044	8.31354	5.44486	3.94602	9.00865	7.4631	12.3644	10.5723	7.32284	11.5488	6.89174	9.70467	12.4567	3.32417	6.9752	9.13666	11.3805	7.55975	5.76413	9.18424	9.02191	7.03638	13.2191	6.84173	4.62896	6.99269	11.2287	5.58909	11.5041	11.898	3.2835	5.58311	8.79789	4.34905
686	control	African American	7.51872	6.86657	8.36694	9.53975	6.84408	11.3862	11.216	6.55829	9.1328	4.54808	13.1277	6.10983	11.3903	8.39289	7.88914	5.99532	4.40202	8.5434	7.65873	11.6505	9.60495	8.4239	11.8255	6.6078	10.18	12.6161	4.1143	5.9428	9.89428	10.5401	7.74794	6.78866	8.88955	9.92397	7.05132	12.9479	7.37964	4.93764	6.36491	11.4742	5.29949	8.53351	12.2599	3.27456	5.79729	8.88724	4.90517
687	control	European American	6.73356	5.8906	8.5962	9.21945	6.31363	11.2807	10.9811	6.64592	8.70958	3.12152	12.4979	4.93166	10.3357	8.68824	7.33456	4.04896	3.68245	8.70698	7.66536	11.5976	10.1553	5.02153	10.4221	6.0538	10.1946	12.5377	3.29686	6.71449	9.4224	7.96284	7.18919	5.34051	8.17808	8.7067	6.143	13.2356	7.27528	4.67565	6.60967	11.0467	5.33579	6.19668	11.4133	3.74207	5.42571	9.10522	4.66655
688	case	African American	7.24575	6.23955	8.40333	10.0889	6.55563	12.0209	10.894	5.94078	8.75307	3.62432	11.0831	5.44761	10.0647	8.31513	7.20394	4.54211	3.94423	9.05955	7.78584	11.9749	10.1262	5.02872	12.1864	7.48629	9.51907	12.377	3.78724	6.21979	9.37544	9.36775	7.47994	5.23646	8.55055	9.07724	6.09096	12.4113	6.45501	4.44345	6.97775	10.3144	5.55444	6.58733	12.0628	3.47744	5.24945	8.83041	4.36521
689	case	African American	7.19903	5.78805	8.3019	9.29476	6.76503	11.114	11.0396	5.68612	8.86424	3.79075	11.862	4.46569	10.9563	8.93078	7.25898	4.54122	3.45982	9.07148	7.68569	11.5444	9.54434	5.98373	12.5071	6.40966	9.77134	12.5548	2.91111	6.99892	10.0787	8.70407	7.67493	5.71238	8.43432	9.05652	6.29463	12.3706	7.4858	4.92001	6.84153	10.4884	5.2973	7.17774	12.2444	3.51998	5.71231	9.08324	4.27964
690	case	African	12.3637	6.38209	10.4419	6.62483	6.84226	11.768	10.5729	5.76879	8.45831	3.02697	11.4025	6.17054	10.5683	7.21658	9.19279	5.57953	3.4568	8.58588	7.56654	11.3648	9.03864	8.94331	11.866	6.57048	9.30853	12.5074	3.98521	6.04112	9.49208	10.0109	7.21993	6.1381	8.7488	9.12678	6.22726	9.37637	6.93269	5.21483	6.14026	10.0687	5.92118	12.7875	11.8731	3.34847	5.95036	8.96428	4.35724
691	control	African American	10.6264	6.74707	8.64426	8.13112	6.14193	9.07837	11.1366	7.74755	8.84772	6.2376	12.241	4.34571	10.1777	8.89648	8.76238	5.61175	4.69192	9.62281	7.69395	11.7111	9.14938	5.15899	12.3656	6.86248	9.73494	12.6673	3.4858	5.99222	9.64685	8.79141	7.78639	5.55194	8.84069	10.2514	5.89492	12.1128	7.21808	4.78192	7.17696	11.6445	5.56737	7.05142	12.4041	3.31821	5.60016	9.34795	4.6828
692	case	African American	14.9349	8.92056	8.51326	9.79456	7.01605	12.0993	10.8911	6.88502	10.847	5.99328	14.2966	5.68621	11.1441	8.82472	9.85465	5.66238	3.73246	9.97169	7.29427	13.522	10.5548	5.62957	12.6853	8.67825	9.39825	12.5593	4.86747	6.13823	8.83472	9.80143	8.17586	6.77161	10.4239	10.6704	5.76264	12.3636	9.08447	5.04657	8.38066	11.672	5.96656	10.4571	12.51	6.0531	6.39226	9.80941	7.19391
693	control	European American	12.1799	7.02864	8.72818	10.3557	6.85555	11.8115	11.2958	6.41821	9.19723	4.11654	12.0702	5.46494	9.21615	8.32031	8.59449	5.27504	3.56101	9.27495	7.95357	12.3372	10.2653	5.9865	10.9886	8.53267	10.2537	12.6399	3.7056	6.2537	8.68653	8.88659	7.67775	5.64244	8.93631	9.65237	6.36661	13.3014	7.14354	4.61103	7.02263	11.4329	5.22549	8.88554	11.4982	3.93371	5.85391	9.18579	5.17423
694	control	African	10.4969	6.80412	8.60382	10.0008	7.66308	12.177	11.1265	6.45363	9.2702	4.31061	11.2941	7.02991	10.4189	8.76861	8.17595	6.08099	3.31412	8.78911	7.96845	12.0394	9.67266	9.14805	12.83	7.20007	9.95722	12.6344	3.89165	6.91377	9.50661	10.9392	7.50135	5.74757	8.90945	9.20867	6.71854	11.2741	7.15728	5.73851	6.92746	11.8925	5.89149	13.8662	12.1344	3.33764	5.46622	8.91518	4.79563
695	case	European American	7.91692	6.17015	8.51218	10.2343	6.60118	11.902	11.3747	7.31597	8.96086	3.48517	12.5852	4.76943	10.6551	8.97506	8.2986	5.08131	3.52676	8.33369	7.69754	11.7751	9.83093	5.61598	10.9959	7.08157	10.5381	12.7037	3.6933	6.97149	8.88587	9.26235	7.31848	5.49258	8.14662	9.37974	6.00468	12.7897	6.79928	4.21463	6.1612	11.2311	5.12731	7.30856	11.9264	3.93898	5.56111	9.06414	4.24869
696	control	African	11.8452	6.17892	9.05497	9.91208	7.14364	12.0622	11.2539	6.01418	9.07339	4.19174	11.1173	6.84732	8.61695	8.70212	7.8108	5.40603	3.66048	8.88884	7.60708	12.1978	9.74397	8.80529	12.5024	6.91853	10.0722	12.5764	3.17402	6.96469	9.21737	11.2624	7.54512	5.89246	8.83513	9.10582	6.60423	12.6245	7.006	4.51175	6.84241	10.1243	5.80086	10.8093	11.8693	3.30118	5.49821	8.97639	4.58306
697	case	African	14.3352	7.28279	8.77873	7.6703	6.92754	11.9827	10.5708	4.90006	9.10953	9.82495	11.2494	6.07922	10.6975	8.14225	8.81905	5.5893	3.73202	9.20148	7.66976	12.2412	10.0888	7.16839	12.4826	8.29247	9.2586	12.5675	4.3131	6.81186	9.45408	13.3396	7.94942	5.84041	9.3863	10.0349	6.31952	10.9748	6.81812	5.17301	7.1583	11.0458	6.15619	13.7859	12.4312	3.50195	5.61966	9.38118	4.78679
698	control	African American	7.96924	7.30362	8.75675	9.10948	7.01936	10.7091	10.8549	7.16914	9.77053	4.69864	13.3283	5.4521	10.0247	9.55417	9.59778	5.20585	3.8214	9.49934	8.08297	11.6156	11.5661	6.75537	12.1006	6.25116	10.0558	12.7065	3.94394	7.3012	10.4297	9.49229	7.93008	5.91168	9.16473	9.82053	6.95154	13.5608	7.48409	4.89619	7.25426	10.2259	6.00456	8.35714	12.1785	4.53697	5.9473	9.14991	4.96932
699	case	African	11.8623	6.74011	9.57498	5.46066	7.23447	12.021	10.883	6.30675	8.64035	4.79863	11.0374	5.8975	11.5327	6.63106	8.02356	5.01493	3.33517	8.8025	8.02875	11.8522	8.6938	4.59008	12.9074	6.76609	9.58123	12.6273	3.77736	6.27099	7.87676	9.49355	7.14154	5.23864	8.50592	9.47869	5.71499	10.3054	6.80014	4.7281	6.42527	10.2584	5.97066	9.73369	12.4233	2.63503	5.58862	8.70666	4.29596
700	control	African	11.2789	6.26529	8.63387	9.83229	6.38555	12.0647	11.0983	5.97567	8.7485	4.20236	11.1285	5.24877	10.2861	8.61282	8.50799	3.68701	3.20849	9.10325	7.72484	12.0657	9.9945	7.52076	11.9901	6.82253	9.88186	12.5528	3.64309	6.16918	9.59756	10.1479	7.53565	5.29822	8.39533	8.89835	6.31952	12.7015	6.75855	5.09306	6.00171	10.7239	5.47539	13.7156	11.907	3.28623	5.6605	8.73454	4.1545
702	control	European American	14.8723	7.253	8.8119	10.1935	7.49562	12.5316	11.1882	6.2387	9.2836	5.20245	13.1538	5.69197	9.71487	9.00085	8.16992	5.72707	5.11531	8.61085	7.92491	12.6989	11.1705	7.18854	11.1163	8.34622	10.1781	12.7069	4.73819	7.01252	8.36449	10.4229	7.90385	5.79937	8.81771	10.1323	6.74902	13.7088	7.02672	4.47088	6.79684	10.9747	5.93506	9.37566	12.095	4.88951	5.98591	9.59243	5.30552
703	case	European American	7.31666	5.99059	8.22274	9.34578	6.24432	10.6995	11.2076	6.76031	8.52575	2.98576	12.0533	5.10854	10.2118	8.50214	7.07306	4.83615	3.06154	8.39946	7.52748	11.6289	9.4289	5.21868	10.4286	6.32146	10.0424	12.3985	3.31275	7.24094	9.35176	8.97562	6.97139	5.16314	7.81308	8.91348	5.54387	13.0175	6.76997	3.71733	6.1817	10.9864	4.9519	6.52658	12.0097	3.69565	5.53741	8.95293	4.30122
704	control	African	11.9011	7.11711	10.1974	8.78039	8.27942	11.615	10.8192	6.58931	8.64801	7.39024	11.0602	6.6833	9.26461	7.24576	9.92245	6.82038	4.23134	9.16393	7.83923	11.9801	10.4857	7.5503	12.2294	7.15318	9.64972	12.489	4.42896	6.35815	9.06596	10.8805	7.46824	6.02477	9.81013	9.93996	7.4377	10.838	7.72723	5.10052	7.18954	11.4974	6.60861	11.7868	12.2023	3.47882	5.98971	9.22304	4.44116
705	control	African American	11.5897	5.96696	8.35012	8.93612	6.32716	12.1	11.0194	6.40816	8.11036	3.68957	12.0826	4.45214	9.272	8.10889	8.16261	4.7704	2.88204	8.14373	7.65315	12.0188	8.8788	6.45602	10.3989	5.57273	9.23706	12.3347	3.33928	6.17136	8.24908	8.40567	7.09545	4.70283	8.18564	8.461	5.98504	12.2181	6.46044	4.11046	7.22154	10.128	4.9127	6.73579	11.546	2.66674	5.35355	8.42574	3.95421
706	control	African	14.4855	6.12775	8.79846	9.60329	6.61878	12.2436	11.3309	6.18813	8.64852	9.69995	11.0103	5.60736	11.1861	8.52552	9.04048	4.80036	3.74763	8.63686	7.65717	12.3592	9.74611	6.43586	12.1892	9.11129	9.73519	12.374	3.47246	6.01886	9.83022	12.784	7.62775	5.78094	9.15254	10.2975	5.99454	9.91116	6.86786	5.15469	6.57415	10.8839	5.63229	13.7868	11.7028	3.61947	5.25969	8.94627	3.82633
707	control	African American	10.4527	6.41557	8.41214	10.063	6.80954	12.3687	11.3296	7.23458	8.86343	4.3972	10.9555	5.37064	10.3715	8.63847	7.03171	4.41203	4.03555	9.13585	7.69046	12.6311	9.63943	5.97944	12.5136	7.28489	9.72016	12.4441	3.70503	6.233	8.76328	9.29779	7.72743	5.4236	8.50564	9.20331	6.2813	13.2896	7.15849	4.62471	6.44214	10.8879	5.36741	8.80539	12.2999	3.61084	5.80829	8.98465	4.39874
708	case	European American	7.68849	6.56129	8.59147	7.64361	6.60252	8.75475	10.8179	7.37725	8.98933	3.71418	12.0152	5.18874	10.1899	8.82718	8.05554	4.89383	3.18048	8.69818	7.06551	11.6411	10.5708	5.5041	10.2999	5.85144	9.71628	12.5607	3.99434	6.61387	7.63853	8.87911	7.38979	9.83311	8.3491	9.45126	6.14685	12.7909	6.64026	5.26657	6.9062	11.5995	5.26466	7.46362	12.1805	4.05333	5.56544	9.21842	4.6395
709	control	African	10.3729	5.57771	9.30292	8.73767	7.1038	12.289	11.0118	7.42634	8.22782	3.80039	10.9285	4.96177	11.1217	7.37065	8.43964	4.47235	3.86659	8.71111	7.50381	12.1027	8.90837	9.4319	12.334	6.41099	9.36943	12.5931	3.22023	5.85514	8.97565	10.338	7.38559	5.58225	8.18493	8.9587	6.56082	9.07644	6.92819	5.47179	6.28459	10.5091	5.3334	13.698	11.7877	2.26832	5.4499	8.56985	3.89908
710	control	African	7.06456	7.25341	8.55022	8.75207	8.01758	11.4351	11.1063	6.31637	8.77675	3.17138	10.9792	6.81181	9.94829	8.40309	7.87766	5.38837	3.79023	9.20914	7.5401	11.8539	11.136	7.42476	12.4702	5.35175	9.92378	12.5989	5.10143	7.05945	9.53063	9.78858	7.13524	5.87607	8.70441	8.30727	6.68961	14.0406	7.16318	4.66089	6.33047	11.7826	6.27129	14.23	11.5426	3.48667	5.48049	9.03801	4.81385
711	case	African American	6.32744	6.55058	8.67313	8.89834	6.64808	11.3298	11.0192	7.55003	9.29232	4.16787	11.1509	5.51223	9.90911	9.05794	7.39799	4.50833	3.75447	8.98152	7.64698	11.4831	9.13924	5.92318	11.8758	6.07517	9.32023	12.4504	3.65029	6.68834	9.03986	9.19713	7.27097	5.96731	9.09384	9.62428	6.04955	12.5677	7.66408	4.42759	6.34204	10.6865	5.21836	7.6558	12.4134	4.81308	5.36502	9.18775	5.1191
712	case	African	14.7228	6.89524	8.891	8.74478	7.11147	12.8079	11.283	5.5652	9.03944	15.1563	14.409	6.28238	10.5381	8.18212	8.85011	5.2834	3.90717	8.88279	7.86245	12.7054	9.62002	6.95224	13.4172	8.08931	10.0326	12.6205	3.88047	5.9209	10.4414	15.1293	7.80427	5.9874	8.95872	9.88042	6.63419	11.0158	7.18747	5.36861	6.7329	10.3998	5.6755	13.8592	12.3882	2.93351	5.83093	8.59631	4.25212
713	case	African	15.7548	7.99321	9.33754	6.67148	7.48412	12.7826	10.9065	6.0336	9.74661	10.0788	12.4456	5.86765	10.3052	8.10454	10.4844	6.6045	4.7185	9.73753	7.66667	12.9335	9.50411	8.59987	12.6087	8.03005	9.65874	12.74	4.44802	6.94139	8.84363	13.7828	7.6768	5.72361	9.7026	9.6967	6.4867	11.4765	6.63312	5.24155	7.2511	10.8834	6.39458	14.3551	12.9656	4.09838	5.49131	9.39308	5.37282
714	control	African	10.5331	7.44929	8.70555	9.9604	7.30393	12.4794	11.2369	7.31456	8.59273	4.28594	10.9761	8.44741	10.1577	8.86734	9.28794	5.38826	3.68739	8.9496	7.92486	12.368	10.1151	7.83688	12.5815	7.71141	10.0834	12.5418	5.32023	6.70138	9.23956	9.51095	7.53307	5.80221	9.58657	9.09378	7.62844	12.6703	6.90602	5.2735	6.20738	11.0678	6.5206	8.44192	12.4088	3.89282	5.61694	8.61159	4.78234
715	control	African	9.05466	6.65737	8.47698	9.32686	7.13105	11.5712	10.8836	6.49308	8.62078	4.35982	11.0424	5.80376	10.6988	8.66608	9.33583	6.27636	3.5346	9.17702	7.63801	11.8697	9.84237	6.62567	12.2083	6.9051	9.93716	12.5947	4.10421	6.34167	9.42092	10.1102	7.64729	5.49418	8.65753	9.18054	6.75784	12.3918	6.96719	5.35837	6.64716	10.9253	5.885	9.22038	12.013	3.26104	5.54104	8.73511	4.47915
717	case	African	11.5548	5.59672	10.8731	5.89173	6.77904	12.5908	10.5308	5.11186	8.60627	4.36076	10.3035	4.68423	9.38517	6.55931	7.09635	5.20978	2.78756	8.59806	7.55499	11.6714	7.20929	4.32444	9.56896	7.65695	6.6779	11.7014	3.53324	4.11923	7.43169	7.28759	6.61472	6.0382	8.95803	9.55413	5.684	9.59424	6.76202	4.30316	6.31118	9.7811	5.25998	7.26297	12.1335	2.8693	5.69608	8.72518	4.52728
718	case	African American	7.27154	5.86477	8.55215	10.1646	6.44491	11.2868	11.0099	6.30375	8.36817	3.6706	11.1073	4.37767	11.2477	8.07672	6.42352	4.06259	2.99866	8.23134	7.55681	11.47	8.55806	5.1425	12.0988	6.50559	9.3738	12.3419	2.07498	6.23825	9.41321	9.18963	7.07108	5.1071	8.06969	8.62111	5.77637	11.9994	6.44388	3.84171	6.18045	10.6884	4.76571	14.122	11.7817	2.77188	5.08968	8.49251	4.00099
719	control	African	12.383	6.98722	9.3287	9.93568	7.23808	12.4542	10.9866	6.3673	9.3282	7.03592	11.7789	6.62775	9.44678	8.15451	9.32582	5.09807	3.53761	9.28938	7.78433	12.289	10.887	7.78574	11.8027	7.69462	9.51982	12.5637	4.08475	6.47435	9.67823	9.54319	7.79384	6.0062	9.56751	9.50676	7.38771	10.2522	7.55259	5.13757	7.11402	11.2087	6.21688	8.82881	12.2729	3.62863	5.09334	8.79968	5.05738
720	case	European American	15.6673	6.18616	8.70913	9.63134	6.6595	12.4707	11.4135	7.08694	8.40664	7.8612	13.9589	5.12821	9.6692	8.4751	7.48433	4.55544	3.33542	8.66171	8.10549	12.5334	10.293	5.36901	11.6496	7.85517	10.2007	12.675	3.35614	6.66079	8.58635	9.61073	7.31162	5.09445	8.13978	9.6125	5.9997	13.0191	6.46608	4.6625	6.12695	10.9802	4.9211	10.1884	11.526	3.64542	5.42055	8.81177	4.71107
721	case	European American	8.43902	7.4691	9.11648	10.7287	7.39378	11.6054	11.5239	8.15013	9.36813	4.28903	12.3081	6.38765	11.191	9.116	8.46931	4.53178	4.11557	9.44432	8.46852	12.7189	10.8294	5.90353	10.6974	7.18333	10.4397	12.752	5.31051	7.28315	7.22441	9.3448	8.06054	5.77298	9.20639	9.68167	6.51306	13.1546	7.28864	5.8226	7.1191	12.1582	6.09379	7.40396	12.6474	4.53908	5.91579	9.56764	5.76169
723	case	European American	7.61248	6.03834	8.61134	9.64234	6.80285	11.1491	11.3083	6.56337	8.91095	3.89918	12.1954	5.69646	9.91066	8.90579	7.3977	5.08592	3.25775	8.49397	8.07799	11.5901	9.80221	4.71994	10.2818	6.40101	10.0696	12.7159	3.4747	6.64513	9.22691	8.82701	7.48242	5.60995	8.29408	9.55729	5.73222	12.8068	7.44323	4.8036	6.98805	10.8508	5.59298	6.59336	11.5958	3.22549	5.6451	9.19973	4.65765
724	case	African	9.37104	5.86113	10.7418	5.02475	6.75211	12.1082	10.641	5.43047	8.29544	2.34851	10.386	4.98864	9.5356	6.59951	7.60387	5.45009	3.21358	8.91625	7.79839	11.6893	8.6369	4.44229	11.0276	7.11358	8.89963	12.1065	3.71008	5.10248	7.14143	8.58879	5.60388	6.39519	8.0395	9.64567	5.05519	9.43579	7.31735	4.41456	5.89191	9.96584	4.95487	12.7008	11.3489	2.73175	6.12239	8.63764	3.81207
725	case	African American	8.96716	6.93994	8.93	9.56228	6.31427	11.4869	11.1709	6.2817	9.24141	6.03078	11.8135	4.99525	10.5539	8.79548	8.47196	5.90194	3.39989	8.55347	7.81875	11.9684	9.22383	4.2817	12.03	7.16033	9.94038	12.3922	3.57761	6.95134	9.16465	8.91945	7.40317	5.65239	9.02466	9.33571	6.44848	12.7321	7.76602	4.47143	7.20962	11.6819	5.36575	7.95821	12.5435	3.96354	5.51798	9.20625	5.38393
726	control	African	13.2114	7.43316	8.54175	9.69914	7.58249	12.2342	11.0508	6.19724	9.11336	7.17659	11.2275	6.8785	10.8622	8.53987	10.0587	4.92813	3.4059	8.83947	7.37143	12.1812	10.38	7.99379	12.2725	7.94618	9.85056	12.5783	3.95679	7.33545	9.33502	12.6839	7.74408	5.82552	9.15629	9.54473	7.38284	12.3082	6.76945	5.17692	6.98717	11.7234	5.99317	14.1274	11.8573	3.21217	5.78779	8.94744	4.64036
727	control	African	9.52662	6.46335	8.39584	9.16262	6.76579	11.6749	11.1746	6.2611	8.67191	4.27807	11.0369	5.68562	10.6793	8.76089	7.99563	5.79054	3.90118	8.64937	7.47238	11.6336	9.23062	7.60045	12.4441	6.37159	9.89544	12.5658	3.54286	6.27518	9.46386	8.93671	7.54517	5.43003	9.0073	8.74927	6.45532	12.1448	6.52152	4.6348	6.76603	10.8669	5.68686	7.82055	11.9433	2.75039	5.53342	8.56449	4.1535
728	control	European American	11.0917	6.29004	8.58577	9.46699	6.47254	11.9337	11.2576	6.30643	8.70771	3.94581	12.5773	5.36038	10.587	9.13586	8.19211	5.46421	4.43357	8.99863	7.70837	11.7387	10.3513	6.74321	10.2763	7.16557	9.74258	12.5892	3.16103	6.61425	9.09577	9.15625	7.30131	5.40279	8.4038	9.40033	6.3719	13.1819	6.81937	4.53406	6.80175	11.0058	5.17199	7.80506	12.1717	3.80747	5.55942	9.03688	4.55186
729	case	African	7.99937	7.7944	9.65599	6.14457	7.11437	11.505	10.9611	6.28934	9.46943	3.67161	11.001	5.89681	10.9187	8.13391	9.08442	6.56726	3.62201	9.14186	7.81775	12.0636	9.00213	5.29526	12.3312	7.54707	9.87694	12.5183	5.03633	5.90883	8.96847	8.73771	7.83972	6.27935	10.0868	9.39731	6.26599	9.32028	8.03702	5.30644	7.43889	11.4338	5.9346	8.30055	12.62	4.13104	5.62648	9.48941	5.2112
731	case	European American	7.80369	6.67579	8.34804	8.28723	6.70691	9.26807	10.6848	6.47852	8.8517	4.52757	11.8569	5.87123	9.94821	8.74358	8.57763	4.27459	3.54679	8.96426	7.30337	11.3233	10.2507	6.39411	10.4062	5.53817	9.62749	12.4232	3.93485	6.1158	8.94866	8.08241	7.24789	5.9063	8.69766	9.23445	6.45273	13.0869	7.34546	4.43432	6.77887	11.3145	5.2414	6.93585	12.2454	3.61652	5.64302	9.00216	4.97267
732	case	African American	8.75234	7.62867	8.69577	10.04	7.04767	11.8867	11.1257	6.56632	9.68962	4.67927	12.2676	6.65548	11.2343	8.54636	9.99952	5.4923	4.45872	9.05824	7.28525	12.306	8.2593	6.24719	11.6347	6.70631	9.66268	12.3245	4.41308	7.22863	9.24157	9.85211	7.69566	6.10388	9.92123	9.54395	6.66358	13.1179	7.47922	4.7678	7.50448	11.9348	6.17586	13.4043	12.62	4.84324	6.57756	9.52008	5.58028
733	control	African	8.00013	6.08978	9.15102	9.40719	7.11657	10.4832	11.2142	7.30642	8.7369	3.7688	10.9189	5.84069	9.81287	7.85498	8.65604	7.20317	4.22978	8.58561	7.84625	11.3865	10.0798	6.13921	12.5344	5.04518	9.61587	12.4578	3.47059	6.18423	8.61349	9.86685	7.07381	6.13129	9.5591	8.83108	6.60025	10.7005	7.55972	4.7287	6.65257	10.5045	5.25381	14.3438	11.4968	2.64483	5.71867	8.96541	3.85796
735	case	African	14.2601	6.33323	9.36714	10.3453	7.39357	12.579	11.4368	6.8025	8.95706	9.06174	11.2614	7.12484	11.3847	8.83651	8.39297	5.16768	4.07361	8.92456	8.18406	12.5058	9.38905	6.57069	13.0099	8.08319	10.2539	12.6158	4.15269	6.80207	10.0624	12.4143	7.62563	5.69714	8.80394	9.73899	6.24933	12.8009	7.43311	5.36914	6.97691	10.7584	5.76613	13.6945	12.4792	3.96508	5.52812	9.2631	4.4172
736	control	African American	10.3433	6.21528	8.49712	8.19114	6.42584	11.8989	11.2303	5.97351	8.84084	3.80911	12.201	5.50533	10.3913	8.68188	6.66235	5.59651	3.359	8.47073	7.53533	11.8319	9.50786	6.09316	10.6023	7.12397	9.54776	12.5485	3.80633	6.59085	8.56615	9.26893	7.46697	5.48934	8.97112	9.50691	6.36556	12.9115	6.9928	3.98693	6.78348	10.9905	5.48345	9.75202	11.9511	4.03201	5.68375	9.00568	4.15367
737	case	African American	8.15618	6.83799	8.92224	7.41299	6.90727	9.04086	10.9781	6.79402	9.21169	4.50014	12.0453	5.82673	10.5591	8.6689	7.90826	4.44361	3.40059	9.31124	7.6797	11.8052	9.44721	5.82013	11.7084	5.42779	9.19402	12.439	5.10927	7.28883	9.23942	9.44304	7.65941	6.21635	9.06348	9.09415	6.43104	13.1216	7.57311	4.96092	6.87019	11.1041	5.77995	7.69059	12.4879	4.61486	5.8437	9.30144	5.71634
738	case	African	15.1312	6.2515	10.5408	7.34869	7.07684	12.9894	10.9106	5.07083	8.11689	5.12566	13.1569	4.75898	8.70432	6.99776	7.50055	4.79785	3.111	8.99926	7.38689	12.7962	9.22435	5.26784	10.0637	8.03384	6.78322	11.8459	3.28273	4.18799	2.88098	9.25389	5.97129	5.87699	8.49485	9.63469	6.28793	9.7923	5.64421	4.72919	6.40575	9.72425	6.03495	7.33122	11.3086	3.16585	5.88583	8.37248	3.68745
739	control	African	15.1161	7.489	9.01287	7.44427	8.3	12.1041	10.7569	6.41621	8.94706	14.5175	14.9225	7.63458	11.1664	8.92672	10.7628	5.87365	4.61876	9.76216	7.81945	12.6218	10.9959	11.1783	13.3574	7.70533	9.97785	12.627	4.47441	8.09192	8.95379	14.7844	7.77894	6.4573	9.76777	9.03452	8.57416	12.5655	7.29163	5.27829	7.02445	11.4661	6.8067	14.5807	12.1963	3.68771	5.0774	9.17194	5.03727
740	case	African American	8.80027	6.4073	8.24417	9.62034	6.27318	11.3894	10.8941	6.2348	8.83965	4.02493	11.3381	4.8915	10.1813	7.80669	7.65564	5.54905	3.15912	8.75942	7.65944	11.9963	8.10174	5.25945	12.306	6.90952	9.38041	12.4306	3.56071	6.54817	9.0703	9.1054	7.36939	5.36971	8.44181	9.34936	5.642	11.3561	6.52701	4.9161	7.04562	9.93349	5.85913	8.0144	12.2528	3.83532	5.32851	8.99758	4.87855
742	case	African	15.1607	6.48681	8.32132	6.74344	6.46376	11.6272	10.8298	5.1144	8.94698	10.398	11.2081	5.76798	10.206	7.6451	9.5291	6.06535	3.43324	8.88391	7.56765	12.1512	9.16399	5.69898	12.0117	8.03709	9.48486	12.455	3.17906	6.57992	9.00796	12.9495	7.56047	5.317	8.85857	9.67439	6.11377	11.7922	6.70128	4.78885	6.45373	10.2518	5.56567	14.3414	12.135	3.49981	6.01745	8.77551	4.23487
744	case	European American	8.2085	6.30928	8.84495	9.79068	6.56724	11.5194	11.2427	6.25641	9.09411	3.11948	12.6949	6.31791	10.7319	8.2535	7.58007	4.96543	2.95439	8.56327	8.10078	12.0735	8.99097	6.28968	10.9242	6.20484	10.0642	12.5105	3.5784	6.01992	8.88823	8.56276	7.61195	5.59598	9.05273	8.94555	6.31493	12.602	6.78474	4.49418	6.78643	11.5508	5.68832	7.11352	12.1911	3.55989	5.59928	9.03191	4.52369
745	control	European American	7.91168	6.71881	8.82516	9.70038	6.45918	11.2531	11.1549	5.93396	8.83178	4.10717	11.7004	4.58734	9.4938	8.48935	6.64453	4.77804	3.49465	8.54155	7.79344	11.4474	9.83397	5.32397	9.92464	7.09891	9.69646	12.4247	3.68764	6.3882	7.78926	8.21288	7.27565	5.40028	8.38996	9.81731	5.61723	12.8597	6.55622	4.26741	6.67506	10.8342	5.26211	6.5217	11.8994	4.12096	5.47085	8.69135	4.76486
746	control	African	8.53813	5.84604	9.5416	9.61222	7.36858	12.1919	11.4665	6.6924	8.29597	3.69712	10.8205	6.49573	10.721	8.32051	7.75854	4.58248	3.99139	8.88038	8.32195	12.2382	10.3281	9.01098	11.7191	6.51418	9.35332	12.6575	3.39906	7.04436	9.00038	10.4293	7.52535	5.68515	8.57482	9.29628	7.05647	13.2687	6.94852	5.04581	6.75198	10.8312	5.80848	8.75887	12.4023	3.17201	5.64503	8.50477	4.31138
747	case	African American	7.68089	7.20239	8.3353	7.78514	6.1073	9.42799	10.8131	6.39366	8.70998	3.78278	12.0701	5.22957	9.96874	8.63739	9.3078	4.95787	3.7873	9.09972	7.59504	11.9303	10.3161	5.18436	11.7136	5.31217	9.67245	12.4108	3.98023	6.52835	8.513	8.67692	7.24032	5.98813	9.28599	8.97321	6.29231	12.3091	7.68744	5.10918	6.62599	10.9439	6.23944	6.50714	12.4178	3.91413	5.4877	9.02128	5.29671
748	control	African	14.124	6.3301	8.67499	9.78335	7.25175	12.4983	11.1814	6.60037	8.72056	4.91893	12.876	5.91344	10.486	8.28646	8.74203	5.58462	3.78865	8.8744	7.75	12.6305	9.93298	6.54633	11.9894	6.80661	9.90298	12.6183	3.43952	6.7168	9.07484	12.155	7.83276	5.77713	9.04125	8.86142	6.60757	12.1743	7.60243	4.88329	6.40033	10.754	5.65908	11.9332	12.1581	3.53421	5.52506	8.94607	4.30516
749	control	European American	8.30591	6.74594	8.70193	9.22899	6.601	11.0972	11.2949	6.85265	9.00618	4.90975	12.7618	5.34542	11.0647	8.58564	8.34888	4.38002	3.47399	9.30548	7.70262	11.9596	10.3737	4.76864	10.9248	6.79235	9.99274	12.6333	6.57166	6.26803	8.68734	9.29676	7.69892	5.95022	8.5513	9.80605	5.74191	13.3166	6.9867	4.24252	6.92372	11.7861	5.26244	7.6133	11.9602	4.33243	5.64545	9.14545	4.93037
750	case	European American	7.52852	6.42975	8.62538	9.45467	6.71374	11.9663	11.1213	5.34403	8.91343	4.46953	11.8062	5.40713	9.60546	8.65346	7.45519	4.60645	3.40933	8.79283	7.22921	11.7078	10.0606	5.00332	10.2094	6.64048	9.74253	12.4419	4.07011	6.56744	7.15917	8.43796	7.19496	5.41677	8.57451	8.8633	5.69686	12.8344	6.8856	4.40245	6.33732	10.9063	5.49305	6.28795	11.5035	4.01162	5.44195	9.13712	4.91682
751	control	African	11.2216	6.75275	9.08132	9.9733	7.27509	12.3479	11.0337	5.38676	8.68615	4.67584	10.8373	6.81892	10.5994	7.54255	7.72679	5.80613	3.49135	8.2856	7.4449	11.9803	10.1633	6.87858	11.0896	7.14127	9.766	12.5635	3.76169	6.90488	9.2821	10.046	7.19658	5.50595	9.10607	9.03584	6.6385	10.5558	7.00089	4.92193	6.20876	10.4928	5.38426	8.92846	11.9656	2.96588	5.49643	8.59044	4.3081
752	control	African	10.01	7.79735	9.221	8.81903	7.73956	11.6198	11.0308	6.52845	8.97623	5.09574	10.9544	6.96543	9.75717	7.91782	11.7328	5.61632	4.07926	9.41103	7.41186	11.8491	9.81962	8.31035	12.4112	6.51471	9.33108	12.4517	4.36202	6.48906	9.27716	10.6045	7.05105	6.4819	9.09167	9.43594	7.31274	10.6174	7.6505	4.99178	6.58355	10.5813	6.22826	9.81306	11.6503	3.81272	6.35327	9.01991	4.64925
753	control	European American	7.92572	6.36449	8.56775	9.40984	6.4915	11.2312	11.0759	6.48341	8.80936	3.68715	12.3751	6.36421	9.67709	8.56125	7.73635	4.80994	3.50506	8.94522	7.7772	11.8537	9.24747	5.68851	10.316	5.55019	9.87061	12.5602	3.33852	6.2875	7.58538	8.50116	7.60626	5.5063	8.47378	8.89672	6.02213	12.6014	7.38643	4.8166	6.56226	11.2894	5.47546	7.35858	11.2078	3.42682	5.63589	9.24511	4.86089
755	case	European American	13.0979	6.74065	8.64891	10.1032	7.13042	12.0457	11.5171	5.92992	8.9432	4.37287	11.8238	5.90851	9.78102	8.47738	7.43321	5.54434	4.10032	8.75309	7.61249	12.3884	9.71984	6.9756	10.7452	8.09655	10.0083	12.6454	4.08579	6.40457	8.57311	10.4028	7.67313	5.69782	8.84961	10.0391	6.93049	12.835	6.81154	4.65688	7.05971	10.6274	5.6142	9.67599	11.8384	3.62996	5.85908	9.17901	5.1016
756	control	African	11.9703	7.66418	9.0154	9.0673	7.67511	11.5447	11.0564	5.44888	9.71375	5.12963	11.5375	6.88606	10.6992	8.43387	10.1666	6.00182	4.07857	9.58149	7.86809	12.3629	10.8386	8.85514	11.5874	6.46378	9.51174	12.4343	4.5995	7.49935	8.4051	10.4746	7.77966	6.58744	9.54626	9.42515	7.59772	13.1939	7.62903	5.13983	7.23988	11.3318	6.5659	9.87714	12.2834	4.14859	5.91962	9.34728	5.53863
758	case	European American	8.52424	5.75768	8.63232	9.46886	6.34308	11.3561	11.0012	6.17818	8.40713	3.32057	12.4216	4.80466	10.0638	8.36841	7.20801	4.46804	3.71448	8.31104	7.60932	11.7909	10.1546	4.3038	10.4497	6.76501	9.94122	12.44	3.24074	6.62192	6.47631	9.19627	7.15785	5.10753	7.98372	8.62039	5.4926	13.2923	6.96173	3.93046	6.40906	11.1284	5.06291	7.40338	11.3434	3.36774	5.69374	9.01868	4.50371
759	control	African American	8.59325	6.33999	8.47508	10.1969	6.16929	11.934	11.352	7.07442	8.7018	3.78961	12.5062	4.04492	10.3903	8.61022	7.78808	5.35562	3.53201	8.50039	7.94223	11.4482	8.56988	3.56172	11.3674	7.75682	9.387	12.6173	3.10485	5.75266	9.62025	9.15098	7.24081	5.30276	8.53525	9.24861	5.7271	12.8256	6.94703	4.34581	6.76928	10.5009	5.34244	7.41665	11.8315	3.24356	5.44203	8.78109	4.13694
760	case	African	15.6477	6.71987	10.2746	7.10133	7.51867	12.5545	10.9973	5.7797	8.77265	11.0987	11.2833	5.36278	11.3033	7.22567	8.65027	5.4486	3.68565	9.31009	8.00383	11.8991	9.47381	8.39692	12.3103	8.25669	9.25216	12.5311	3.7024	6.02828	9.54533	13.8008	7.59072	5.67693	8.68077	9.78925	6.63325	10.05	7.10518	5.03293	6.65091	10.6767	5.94712	14.611	12.1062	3.17114	5.5521	8.97527	4.09331
761	control	African	12.708	7.27402	8.98111	9.91319	6.89339	12.642	11.3093	7.34738	9.09745	5.82597	11.5991	5.80287	10.8005	8.63482	9.06114	5.9453	4.37309	9.52249	7.87217	12.6822	10.268	7.95746	12.4809	7.14938	10.0524	12.4868	5.29322	6.57632	8.86697	10.6272	7.75407	6.22214	9.35446	9.67439	6.82207	12.8762	7.5192	4.9569	6.65315	10.8577	6.25171	9.97915	12.2151	3.9479	6.98374	9.18993	5.56893
762	control	African	7.70079	5.9668	9.09151	9.05506	6.9298	10.9291	10.7405	6.46472	8.54919	3.25301	11.1413	6.60785	9.6192	7.87629	8.40187	5.02348	4.16092	8.3675	7.80525	11.5775	8.77277	8.69638	12.0075	5.92887	9.70266	12.5071	3.60474	6.99141	8.64712	9.74387	7.28501	5.25802	8.97082	8.98154	6.99326	10.0193	7.36184	5.60947	6.28756	11.3951	5.75423	14.1075	12.096	3.3889	5.45555	8.56994	4.27036
763	case	African	15.744	6.71793	9.12534	10.406	8.30022	13.2244	11.8778	8.09138	9.30748	12.429	13.0143	5.65442	11.28	8.49845	8.37368	6.43263	4.56202	9.96405	8.10206	12.9498	10.123	9.61801	13.5851	8.82834	9.97655	12.5925	3.96564	6.69602	9.6937	13.7244	8.50189	6.2957	9.15614	10.7864	6.99273	11.5067	7.13561	5.0411	6.99688	10.8412	5.70832	14.8475	12.6496	3.60703	5.8857	9.26687	4.42788
765	control	African American	8.24093	5.96279	8.45459	9.55461	6.43549	11.6543	11.3884	6.51982	8.81599	3.15622	11.2876	5.05202	10.315	8.52404	7.11049	5.78957	3.29265	8.34274	7.67953	11.6033	9.04823	6.98894	12.2054	6.83009	9.90123	12.646	2.95462	6.09857	10.0019	7.97846	7.18284	5.25868	8.45576	9.25151	6.01659	12.4924	6.86287	3.90093	6.53392	10.7794	5.39057	6.21977	12.677	3.36771	5.60563	8.9399	4.32164
766	control	European American	8.41695	6.10687	8.55855	10.441	6.69298	12.0829	11.5649	7.56611	8.91206	4.65548	12.4931	4.8568	10.5913	8.51548	8.39697	5.5213	4.16295	9.26448	8.44579	12.1388	10.3278	6.25871	10.7134	7.72461	10.1434	12.6103	3.36242	6.57591	8.73489	9.80243	7.60278	5.4552	8.64843	9.56632	5.73683	13.7831	7.14102	4.51284	6.85025	11.6837	5.47873	7.86374	12.049	3.50938	5.71693	9.28262	4.85024
767	control	European American	7.81732	6.60292	8.47541	9.54728	5.22683	11.2637	11.0887	6.53211	9.02121	4.63046	12.3689	5.4421	9.51689	8.90804	8.25771	5.34224	3.0231	9.26979	7.55898	11.5518	9.91283	3.68211	10.5641	6.97696	9.84689	12.6856	3.05091	6.42859	8.43633	9.00665	7.7133	5.54558	8.56584	9.90526	5.31011	12.7551	6.86138	3.94606	6.7554	11.6922	5.3227	7.01319	12.2432	3.83541	5.91876	8.91503	4.44782
768	case	African	9.57282	6.21727	9.16904	9.27457	7.40139	12.542	11.4689	6.70623	9.14156	4.09708	11.2626	6.32126	10.9606	7.76056	8.38423	5.20767	3.9262	9.07523	8.3418	12.5252	9.70845	8.13364	11.9604	7.09282	10.0257	12.6965	3.71352	6.70723	9.92209	9.48019	7.90006	6.01112	9.23126	9.48927	6.50982	10.4847	7.49742	5.16867	6.66324	11.7453	5.6702	8.85742	12.5428	3.92106	5.59839	9.21183	4.08694
769	case	African	8.9341	6.39677	10.7117	5.98768	7.39039	12.1442	10.7402	6.21851	8.47283	4.0182	10.5028	6.07953	9.94795	6.65511	8.52664	5.72802	3.35601	9.11371	7.54092	11.5209	8.93582	7.86934	11.4503	6.71269	7.35336	12.1149	3.95752	5.5422	8.87716	5.46767	6.95415	5.8605	8.82219	8.82366	6.02424	8.80401	6.69723	5.29999	6.03822	10.4111	5.44185	6.78372	12.1963	2.98446	6.13389	8.61747	4.08469
770	control	African American	8.26725	5.91669	8.59924	9.6887	6.7839	12.1601	11.4028	6.22057	8.80937	3.74387	13.7203	5.01118	10.1936	8.51034	7.48186	4.79001	3.39354	8.70466	7.74586	12.0662	9.35262	5.60347	11.7551	6.5746	9.8149	12.5599	3.84239	7.20885	8.57963	8.99975	7.6514	5.33862	8.49903	9.51577	6.14654	12.5024	6.73651	4.17843	7.00765	10.3301	5.51656	8.38684	12.0366	3.64551	5.73801	8.91198	4.55088
771	case	African	15.6401	8.06705	9.06936	8.25532	7.4218	12.3904	11.4142	6.60327	9.65808	14.0455	13.4781	6.20518	10.6201	8.60999	10.1374	5.2883	4.83806	9.25595	7.98117	12.551	10.0208	7.39446	13.0004	8.48735	9.57356	12.7649	4.49685	6.7539	9.56755	14.3013	7.74965	5.87031	9.07422	9.93486	6.46216	13.1204	7.07049	5.15293	6.93959	11.1052	5.71035	14.8391	12.4738	3.66683	5.78219	9.22358	4.64599
772	control	African American	6.90154	6.47415	8.44528	9.44671	6.54754	11.0391	11.411	7.07517	8.71275	4.14682	10.9478	5.19305	10.5114	8.87979	7.20895	4.76389	3.62027	9.11514	7.92758	11.3973	10.0548	5.06057	12.2255	6.28081	9.91373	12.6361	3.55006	6.59035	9.55682	9.38893	7.39795	5.39389	8.47532	8.90656	5.95036	13.4802	7.22566	4.79541	6.41038	10.6209	5.6412	7.09726	11.9805	3.6245	5.66057	8.97889	4.47777
774	case	African American	7.5442	6.08367	8.49113	7.8133	6.40545	9.80496	10.9512	6.43101	8.87943	5.79677	12.3056	6.20344	10.5869	8.8336	8.19439	5.38201	3.44362	8.91225	7.29486	11.265	10.002	6.11767	11.2084	5.98191	9.69131	12.4073	5.57158	6.63678	8.09731	8.34344	7.41602	5.31611	8.54777	9.1409	5.90815	13.2711	7.0894	4.80227	6.77999	11.1099	5.44486	6.75789	11.6187	3.47732	5.94035	8.80314	4.15926
775	control	African	7.76291	6.68824	8.99548	7.63607	7.0878	9.44231	10.807	6.70078	8.77919	3.99355	11.8314	5.86377	10.3421	8.50055	10.2202	5.27821	3.96805	8.9039	7.40115	11.2538	9.42581	7.16758	11.6194	4.9686	9.53504	12.4331	4.42192	6.39908	9.18919	9.38555	7.49709	5.68541	8.81786	8.90921	6.71594	11.7476	7.27929	4.87302	6.47344	10.9438	6.11279	7.43945	12.042	3.29388	5.41091	8.70905	4.61976
777	case	European American	7.68037	6.37202	8.13258	9.47585	6.56312	11.2819	11.1546	7.63461	9.12355	3.8862	12.3609	5.00553	9.94483	8.6104	8.5048	4.91651	3.65479	8.90998	7.71889	11.9448	9.69037	5.4824	10.364	6.29665	10.0726	12.538	4.25104	6.74598	8.53548	8.50355	7.50434	5.29949	8.36122	9.52128	6.33043	12.5568	6.67998	4.66341	6.9075	11.558	5.07206	6.63421	12.0195	3.82251	5.76424	9.08267	5.05791
778	control	African	8.00738	6.08038	8.28112	8.69452	6.80726	11.5503	11.1353	6.4401	8.66473	3.12925	11.1252	5.04352	10.5123	8.47053	7.73086	5.38753	3.38855	8.4183	7.9447	11.8122	9.56228	5.90385	12.6713	6.50401	9.97123	12.5492	3.39512	6.80198	9.43184	8.92766	7.5108	5.83895	8.07103	8.68676	6.25768	12.6294	7.09908	4.60842	6.29778	10.6642	5.41996	8.24585	11.6931	3.2025	5.63441	8.73056	4.40126
779	case	African American	10.7357	6.63619	8.65915	10.2904	6.61489	12.3025	11.443	7.56997	8.84776	3.96824	11.5716	5.03635	10.5448	8.87981	7.77166	5.15062	3.94961	8.68058	7.98704	12.3442	8.8463	5.96529	12.3125	8.17912	10.2948	12.712	3.91436	6.80697	10.2023	11.0091	7.65476	5.5901	8.88142	9.38111	6.10664	12.4332	7.05025	4.78313	6.92799	11.3152	5.40284	9.42013	12.1743	3.29897	5.81348	9.04901	4.85994
780	control	European American	7.22635	5.70696	8.33828	8.47972	6.20247	10.0482	11.2175	6.70028	8.44325	3.25272	12.0541	4.30931	9.11158	8.17427	7.12072	5.3202	3.50783	8.21673	7.51122	11.204	9.59202	4.00409	9.81757	4.71171	9.48029	12.5967	2.98838	6.58875	8.78203	8.31995	7.05757	5.04934	7.97883	8.22492	5.65717	13.0003	6.28779	3.71214	6.09011	11.0135	5.0841	6.61702	11.2916	3.14064	5.3522	8.85992	4.28417
781	control	African American	7.46453	6.88447	8.54243	10.6777	6.73704	12.6011	11.3828	6.56459	9.13403	7.50325	11.4562	4.86001	10.5627	8.83838	8.36925	5.23102	4.31563	9.08516	7.67742	12.1789	9.52295	6.01471	11.841	7.1605	9.90035	12.559	3.73013	6.84554	9.94908	8.66496	7.48688	5.79887	9.16306	9.83016	6.80582	11.7581	7.12848	5.05858	7.04242	10.81	6.02675	7.67447	12.2426	4.34577	5.54462	9.20591	4.89259
782	case	African	11.652	7.98119	10.9132	7.7515	6.91927	10.9759	10.1555	5.00142	10.2547	9.69849	11.084	6.1784	8.29221	7.21778	10.3329	4.74494	5.66005	9.70012	7.41964	12.703	11.0337	9.2897	11.2636	7.87768	9.1573	12.1449	3.90365	5.44184	7.27145	8.53669	7.35049	7.45797	9.59719	11.9875	7.5871	10.4235	7.75797	5.46159	7.5107	12.9243	6.18294	9.20038	12.3726	3.55247	5.86741	9.07011	5.52133
783	case	African	13.2382	7.36728	10.4792	8.26815	6.74707	12.5797	10.9964	6.80641	9.55483	7.47737	11.0231	5.76592	11.0184	6.76428	9.66402	4.07294	3.67812	9.42827	7.35481	12.565	9.69471	7.78409	12.8347	7.94089	7.77626	12.4763	3.26379	5.10647	8.48509	9.48788	7.54126	6.68282	9.43645	10.3301	6.27712	8.58099	6.36314	4.85289	6.99372	12.0803	5.67909	9.3651	12.5457	3.60769	5.80209	8.87454	4.18683
784	case	African	11.9838	7.1924	10.5244	7.2955	6.91721	12.1688	10.5794	5.60904	9.01347	5.04074	10.894	4.66457	9.27663	6.58913	8.33783	6.43807	1.695	9.80596	7.2581	12.2067	8.81839	4.35732	10	6.78681	6.62289	11.6972	4.46231	4.0606	8.24493	7.62785	5.16957	7.10722	9.64601	9.15326	5.41727	9.31993	6.21906	4.46485	6.61479	10.6436	5.65429	5.53713	10.8645	2.96751	5.3273	8.56629	5.14288
785	control	European American	12.6864	6.45655	8.09124	9.94702	6.32	12.103	11.3734	6.53961	8.68012	4.46261	12.0119	4.7474	9.88277	8.61987	9.25917	4.43512	3.1976	8.70664	7.88179	11.9876	9.17912	5.22917	10.978	8.1457	10.0375	12.4937	3.86837	6.37112	8.47098	9.45629	7.33491	4.85732	8.48886	10.0225	5.9651	12.9268	6.55238	3.44721	6.56751	11.0308	4.84702	8.87799	11.872	3.2514	5.47669	8.79675	4.44241
786	control	African American	7.41411	6.04674	8.73117	8.18012	6.52119	9.77383	11.1676	6.60032	8.91697	3.11371	12.4033	5.10507	9.89833	8.66566	7.17571	4.7203	3.72445	8.83302	7.68136	11.4499	10.0478	4.23909	9.97588	5.4818	9.6224	12.6789	3.22148	6.60484	8.89668	9.65206	7.59268	5.51531	8.47595	9.10149	6.10082	13.8026	7.06947	4.70484	6.54289	10.517	5.14534	7.21691	12.3376	3.98337	5.71929	9.06271	4.75946
787	control	African	12.4854	6.04872	8.82342	10.7194	6.75653	12.5551	11.4204	6.00172	8.42229	3.7814	11.4301	4.91485	9.43543	8.50638	7.91938	6.79545	4.10336	9.08235	7.92807	12.2902	9.65016	8.11192	12.0452	7.5807	9.30106	12.7173	2.97999	6.00886	9.33317	11.0235	7.56522	5.18676	9.02703	9.27684	6.62776	13.628	6.4225	4.68882	6.91919	10.9809	5.19408	9.90717	12.1906	2.52557	5.48254	8.62415	6.39181
788	control	European American	8.35308	6.67568	8.27176	10.201	6.09353	11.8618	11.5011	6.40248	8.73311	3.40582	12.499	5.24998	10.0424	9.0058	8.30686	5.17913	3.93203	8.98167	7.84352	12.0199	10.6658	5.63131	10.4597	7.08551	10.0636	12.5898	3.29229	5.9795	8.72129	8.88232	7.5941	5.72719	8.85222	9.36056	6.27827	12.7015	6.93207	4.43726	7.27482	11.2899	5.58582	7.3911	12.0578	3.52733	5.62256	9.10772	4.59981
789	control	African	11.681	6.5987	8.75747	10.1567	7.41294	12.0425	11.0929	5.72015	8.9197	4.53497	11.2829	6.29515	10.8351	8.45218	8.39379	5.30404	3.97808	8.49777	7.14979	11.9986	10.3656	8.26455	11.3013	7.39942	9.83379	12.5874	4.25465	6.51203	9.19665	9.84393	7.56511	5.73616	9.19941	9.0845	6.76594	12.5312	7.24303	4.55981	7.03392	11.183	5.90418	8.69292	11.4183	2.85185	5.48418	9.07305	4.67659
790	control	European American	10.8574	5.80954	8.60393	9.36026	6.21454	11.518	10.9082	5.58725	8.50162	3.33739	11.6144	4.86089	9.08896	8.46074	8.81623	5.07126	3.57565	8.47245	7.78046	11.5691	9.47668	5.07542	9.70213	6.82825	9.70817	12.5025	3.44737	7.26497	7.6312	9.76175	7.20022	5.00495	7.86311	9.07794	5.94745	12.9777	6.61843	3.33092	6.30638	11.1564	5.07239	9.04685	11.7596	3.471	5.48762	8.66957	4.10412
791	case	African	8.28083	6.13959	8.65904	9.1196	7.11482	11.7134	11.4027	6.23553	8.51505	3.9651	10.6723	6.20391	10.0164	8.25076	10.9854	4.67389	3.44382	9.0413	7.87388	11.9974	9.99934	7.12719	12.3155	6.12257	9.78854	12.5478	3.26565	6.4821	9.77945	9.99257	7.02518	5.7118	9.22108	8.77118	6.70735	11.3632	7.3858	4.90888	5.98513	11.9789	5.70765	14.226	12.0078	3.46781	5.60214	8.66103	4.23786
792	control	African American	6.8184	6.30106	8.47145	9.49689	6.50554	11.1789	11.2464	6.52406	8.76082	2.89186	11.1574	5.08435	10.0639	8.79436	6.71718	6.3178	3.64219	8.16035	7.46963	11.6765	10.0116	5.12334	12.0034	6.04687	9.69958	12.5692	3.716	6.63849	8.72887	8.73543	7.33251	5.54706	8.63386	8.60247	6.00625	12.5326	7.26432	4.79258	6.8206	10.3898	5.24582	7.4858	11.7736	3.83647	5.75244	9.0562	4.43485
793	control	African American	7.86355	6.2391	8.56085	9.60218	6.49667	11.6842	10.8427	6.26885	9.02565	4.48914	11.5361	5.02367	10.5371	9.03273	8.75865	5.73816	3.98758	8.86747	7.71786	11.699	8.95325	6.00655	12.2601	7.49258	9.3136	12.6982	2.85364	6.15024	9.22058	8.32962	7.56173	5.46399	9.22505	9.41638	6.08079	12.5066	7.01731	5.13417	7.29358	10.2089	5.59519	6.85795	12.1523	3.51744	5.47038	9.03909	4.54808
794	case	African	12.4373	6.36858	8.93191	8.61048	6.63123	12.3492	11.1034	6.59693	8.95731	5.14511	11.4604	5.83297	10.458	7.9292	8.96141	4.90793	3.64893	9.05009	7.87413	12.4032	9.64457	6.4534	11.9595	7.49189	10.0035	12.7522	3.48321	6.4808	9.34773	10.1062	7.96001	5.91662	8.69306	9.85619	6.84523	10.1369	7.30364	5.46531	7.08793	10.6502	4.965	9.35198	12.3211	3.06185	5.53943	9.07863	4.11083
795	case	African	9.59573	5.54066	10.6522	6.25124	6.67879	12.6911	10.6949	5.9237	8.14181	5.12123	11.0402	4.73508	10.1343	6.42505	7.90187	4.68216	2.7475	8.8251	7.58133	11.9844	8.13167	5.25826	11.4197	7.50495	7.41068	12.1778	3.64645	5.22063	8.58845	8.46651	4.66041	6.31712	8.68974	9.07722	5.32624	9.1436	6.17925	5.06503	6.04659	9.48214	5.45472	6.86546	10.4674	2.51696	5.27421	8.45506	3.62847
796	control	African	10.7283	5.62184	8.55235	9.55281	6.60063	12.2433	11.1715	6.81501	8.39185	4.00967	10.6204	6.16833	11.6246	7.82207	7.52391	4.94154	3.42658	8.57205	7.82338	12.1944	8.96722	8.61216	12.0254	6.67797	9.64232	12.5513	2.43166	5.82472	9.93268	9.56344	7.69568	5.7094	8.35775	9.2769	6.00803	11.2096	6.74227	4.93048	7.17042	10.5206	5.38949	12.9009	12.038	2.25258	5.39286	8.60809	3.70194
798	control	African	9.63309	5.85196	8.32763	9.81744	6.56159	11.2089	11.2438	6.53931	8.7123	4.50255	10.3033	5.51088	10.3416	8.33042	6.6517	4.28921	3.14768	8.13469	7.51654	12.1252	9.47136	8.59919	11.7069	6.44412	9.44911	12.3821	2.82043	6.01817	8.62182	9.67353	7.40694	5.65396	8.58088	9.02601	6.25985	12.1636	6.79177	4.53611	6.72093	9.74087	5.1124	13.6366	11.9323	2.49268	5.68346	8.56432	3.8053
799	control	European American	7.90497	6.28779	8.46633	10.1205	6.87305	12.1516	11.2621	6.41946	8.75657	3.20188	12.0992	5.79127	9.96437	8.54296	8.3434	5.09107	4.09614	8.77918	7.84571	12.044	9.96721	5.40965	9.95736	7.26356	10.0806	12.6637	3.85191	7.45734	9.20912	9.7369	7.18562	5.47484	8.35334	9.15549	6.26924	12.7438	6.76838	4.36091	6.35972	11.0956	5.8387	7.34789	11.8515	3.65815	5.62059	8.94649	4.45746
800	control	African	12.9695	7.38515	8.71827	9.98234	8.43234	12.54	11.2414	6.12613	8.7371	4.97915	11.4268	7.29932	9.69134	7.7857	9.69494	6.25088	4.714	9.0895	7.33269	12.2241	11.6728	9.70059	11.8154	8.16617	9.86889	12.5425	4.41415	7.32959	9.14631	13.9299	7.71337	6.19132	9.03333	9.53184	7.44847	10.7438	7.02214	4.67102	6.73706	10.7614	6.34545	12.4931	12.0629	3.61465	4.89327	8.76988	4.10087
801	case	African	11.7373	5.52909	10.5685	7.38245	7.08774	12.3058	10.7967	6.32239	8.40512	4.19982	9.77948	5.28912	9.91233	7.23959	7.95138	3.82021	4.03416	8.7008	7.82589	11.7697	9.30962	7.72362	11.8	7.20986	8.98838	12.3875	2.93793	5.67563	8.53855	8.40951	7.54595	6.14534	8.46486	9.06807	5.97426	9.58531	7.01265	4.8916	6.10675	9.96013	5.4543	8.44394	11.9613	2.87156	5.54863	8.67669	4.03066
802	control	African	9.84726	7.61496	9.16474	8.08384	7.12554	11.1383	11.0897	5.52932	8.93688	4.28338	11.3555	6.55323	11.2837	7.63912	9.50383	5.84995	3.38556	9.05222	7.55464	11.6753	9.59319	7.58045	11.7282	6.75235	9.26168	12.4384	4.50409	6.42697	9.38708	10.0411	7.62426	6.07636	9.3921	9.09438	6.16862	9.75568	7.25545	5.12531	6.4326	10.3865	6.01587	9.22833	12.0769	3.78423	5.53721	8.82712	5.24974
803	control	African American	14.366	5.75552	8.44259	9.86838	6.45888	12.2433	10.8065	5.34927	8.38582	3.54928	11.573	6.31735	8.83548	7.73837	7.34759	5.2096	3.2889	8.23187	7.01902	12.2938	9.85861	7.31382	12.1355	7.71843	9.40939	12.5026	3.69073	6.10969	8.29861	9.58459	7.16853	5.00218	8.39071	9.4761	6.67101	12.2347	6.32502	4.36623	6.18527	10.5651	5.37653	9.1556	11.6629	2.78279	5.30262	8.70387	3.77104
804	case	European American	7.53158	5.79356	8.78116	9.35788	6.67759	11.0754	11.1731	6.71205	8.75038	3.64204	11.7144	5.46801	9.81565	8.36815	7.27186	6.13244	3.45763	7.66826	7.38311	11.8802	8.95547	5.76645	10.0734	6.24484	10.0851	12.6371	3.42767	6.50924	9.14937	9.01357	7.42802	5.3522	8.85849	8.87989	6.1342	13.1893	7.50343	5.26477	6.28679	11.3371	5.1038	6.85982	11.3981	3.62771	5.54175	9.14197	4.26797
805	case	African	14.5621	6.656	10.5994	6.34312	7.0978	12.7121	10.9291	5.57548	8.95711	14.8208	14.332	5.43413	9.66611	6.53416	8.3013	7.35266	3.22883	9.17201	7.33811	13.1872	9.1776	5.82992	12.7502	8.14481	7.68142	12.5364	3.56156	5.3449	7.86599	14.2068	7.62277	7.3099	9.76196	10.0763	6.169	8.75548	6.84521	5.82234	6.4878	9.83861	5.44977	14.276	12.3592	3.35147	5.9906	8.836	4.65452
806	control	African American	8.47894	5.67027	8.47796	8.76936	6.61943	11.3943	11.4936	6.27007	8.39233	7.01366	11.0545	5.1927	10.0219	8.55497	7.3543	4.94047	3.34273	8.48561	7.58138	11.9692	9.64242	5.35835	12.289	6.77685	9.22275	12.4174	3.46834	6.72581	8.84045	9.28345	6.95488	4.97266	7.91714	8.72066	5.84715	13.3933	6.6659	4.14394	5.87134	9.94218	5.12336	8.33611	11.9733	3.06862	5.52959	8.80866	4.16651
807	control	African	9.413	8.62344	8.49392	8.82634	6.77157	11.4745	10.9262	5.54231	10.769	4.233	12.3085	6.44535	9.81744	8.64497	10.7401	6.11302	4.34975	9.57941	7.40533	13.5094	9.50714	6.20118	11.3522	5.9874	9.56241	12.2853	4.56476	6.32392	9.22526	9.22794	8.08708	6.85405	10.3382	9.51373	6.53518	12.6481	8.28624	4.78168	8.15624	11.6199	6.53501	8.02517	12.6399	5.21988	6.94098	9.69918	6.02719
808	control	African American	8.41056	6.17948	8.62388	10.2617	7.10574	12.1417	11.2925	7.67223	9.01538	4.05343	12.6066	5.41609	9.99362	8.27701	7.06735	5.77567	3.24012	8.74775	7.72181	11.9057	8.01637	5.27999	10.7697	7.40756	9.82498	12.5338	3.79513	6.36411	9.06068	8.08905	7.44899	5.78475	8.16347	9.50316	6.07852	12.1835	6.85052	3.91421	7.2212	10.6264	5.47313	6.36913	11.7494	3.5543	5.67057	9.09631	4.53159
809	control	African American	14.6552	6.9937	8.68328	9.63608	6.98875	12.8228	11.2593	5.78955	9.15781	4.82423	13.892	6.20051	10.6191	8.87914	9.70785	5.21769	4.17912	8.97809	7.53953	13.0405	10.0756	6.63015	10.6607	7.87137	9.66835	12.7229	3.87957	6.66121	8.80612	10.5008	7.88382	6.09	8.69423	9.71814	6.79972	12.834	6.81497	5.38294	6.86321	10.7365	5.86456	9.91966	11.9813	3.82926	6.00859	9.3677	4.47007
810	control	African	13.3095	6.57395	8.63762	9.88697	7.37245	12.6703	11.3236	6.04928	8.57113	5.22669	11.2647	6.04215	11.2112	8.6689	8.51234	5.14631	3.46012	8.97874	7.71115	12.5274	9.7775	7.91677	12.2364	7.39901	10.0187	12.6316	3.55448	6.45958	9.25759	11.1942	8.0479	5.15473	8.53963	9.03692	6.51389	11.5317	7.219	5.19312	6.63804	10.3586	6.00531	10.3048	12.3397	3.26389	5.47201	9.01622	4.55762
811	control	African American	11.982	7.90083	8.63842	8.96896	7.45271	11.892	10.9459	6.18831	10.0189	5.75238	11.8502	6.7659	10.7851	8.93268	9.74195	5.52086	3.80515	9.77705	7.66731	12.641	10.567	6.40609	11.3979	7.72417	10.4088	12.5362	4.60955	6.97652	8.8963	10.692	7.9754	6.61474	9.54639	9.86615	6.9475	13.8357	7.8883	5.15662	7.86276	11.935	6.56681	11.3062	12.5429	5.07252	6.33523	9.50829	5.73137
812	case	African American	9.21275	7.54265	8.58272	10.1123	6.42498	11.3424	11.1993	7.05811	9.58584	4.70957	12.718	5.47942	10.0543	9.57653	8.02495	5.75656	4.98287	9.39938	7.83708	12.4052	10.3084	6.25208	11.2311	6.58452	9.75154	12.5137	4.3313	6.10727	8.97609	10.0261	7.54073	6.46436	9.46396	9.85981	7.15408	13.003	7.49504	5.07782	7.63835	10.7861	6.25395	12.7188	12.612	4.29334	6.03772	9.5184	5.19218
813	control	African	11.2613	6.33269	9.52869	10.0868	6.84084	12.6923	11.3374	7.33379	8.83708	3.40485	11.0267	5.58011	12.2873	7.73827	8.6609	5.50071	3.45693	8.87042	7.93733	11.9834	9.56862	7.33866	12.1225	7.23931	9.87591	12.4585	4.03544	6.55765	9.99187	9.86749	7.55689	6.46883	9.148	9.44365	6.57821	9.92674	7.63775	5.16283	6.71857	10.6752	5.56275	9.82984	12.1577	2.70823	5.63932	8.99206	4.16103
814	case	African	14.9275	8.60157	9.58314	8.25958	7.39295	12.4429	11.1388	6.58905	10.7855	5.88432	12.501	6.15684	10.1268	7.40186	10.7174	5.55205	3.86287	9.61326	7.75991	13.9015	9.96338	7.14456	12.3534	8.52162	9.22119	12.603	4.5138	5.57937	8.87221	10.5695	8.16036	8.18142	10.6479	10.1522	7.11005	9.97592	7.58869	5.40796	8.71026	11.2585	6.4641	11.5623	11.9165	4.91436	5.61715	9.63167	6.09073
815	case	African	15.4174	6.92099	8.78974	9.785	7.27884	12.5945	10.9641	6.63607	9.56413	14.311	13.944	6.009	10.6647	9.15031	11.0352	5.69648	4.77774	9.55918	7.6621	12.925	10.7345	8.74812	12.3754	8.80311	10.1901	12.6266	4.20097	7.33847	9.3173	13.7936	8.07752	6.64115	9.25811	10.1938	7.50908	12.886	7.59794	5.3408	7.15863	10.9879	5.95992	14.4629	12.7499	4.19632	5.65989	9.12956	4.57725
816	control	African American	9.75131	6.30201	8.25543	10.032	6.40665	12.3047	11.2813	6.40491	8.6708	4.2208	11.1243	5.23854	10.6857	9.21873	7.1554	4.35955	2.90346	8.68379	7.59391	12.0892	9.60669	7.02887	11.8008	7.83123	9.82028	12.5036	3.663	6.83842	9.2421	9.72908	7.43723	5.56672	8.7957	9.55451	6.32963	12.3141	6.51996	4.75573	6.60742	10.3362	5.74821	8.82692	12.0667	3.14605	5.26608	8.85882	4.80181
817	control	African American	13.6852	6.23526	9.02764	9.68551	7.12301	12.1374	11.4271	6.20238	8.89004	3.60088	11.1341	5.42075	9.08184	8.67562	7.98038	5.06547	4.83262	9.235	7.81221	12.4944	10.5559	6.43385	11.6192	6.953	9.94691	12.63	3.78001	7.2451	9.00871	10.6014	7.4317	5.23696	8.63633	9.59776	6.42886	12.9558	7.15307	4.52949	6.68967	11.1026	5.86932	14.1878	12.4903	3.94388	5.42138	9.25043	5.0658
818	control	African American	13.6198	6.00699	8.30075	9.8794	6.27927	12.4586	11.3575	6.39065	8.57253	4.3528	11.2286	4.69184	10.4509	8.38159	6.47734	5.06551	3.1403	8.552	7.91496	12.0028	9.07893	5.63074	12.4159	7.37413	9.69689	12.7157	3.33001	6.72098	9.48686	9.56677	7.33253	5.38042	8.79024	9.10354	5.84159	12.3459	7.17728	4.65878	7.08603	9.93865	5.33636	8.78875	12.077	3.28957	5.34097	8.6684	3.96251
819	case	African American	8.21169	6.98484	8.61523	9.26048	7.205	10.5213	10.6818	6.72156	8.68885	4.18117	12.6364	6.93578	9.92777	9.01554	9.7486	5.66019	5.87536	9.63337	7.47749	11.7177	10.5474	6.08088	11.7219	6.33032	9.68675	12.5694	4.5005	6.92009	11.17	8.87154	7.15137	5.61318	8.94301	9.34372	7.37141	12.45	7.55829	5.00664	6.61599	10.0195	6.07376	7.63664	12.2862	3.9302	5.72099	8.97526	5.7118
820	case	African	15.694	8.33364	8.85113	8.12124	7.31735	12.1931	11.2242	6.69697	9.9538	12.2013	12.2298	6.5336	10.8065	8.61019	9.00297	5.3609	4.54392	9.0349	7.756	12.3253	9.72647	7.32026	12.7946	8.08255	9.52038	12.6619	4.00847	6.85356	9.07362	13.446	7.65334	5.64845	9.2412	9.92613	6.56589	12.3212	7.10187	5.32435	6.91373	10.9657	5.63491	14.4503	12.5043	3.53541	5.58655	9.18479	4.48791
821	control	European American	8.09197	6.03104	8.98843	10.3028	6.47671	11.6858	11.2245	7.21456	8.86231	2.88785	12.28	4.86985	10.6375	8.53282	8.15669	4.69973	3.49385	8.43799	7.95822	11.8816	9.1328	4.83624	11.0147	6.84429	10.1279	12.6882	3.70566	6.17013	9.0405	8.75921	7.62822	5.47274	8.42332	9.25868	5.6263	12.8794	6.96459	4.41855	6.16488	11.3215	4.9771	7.31332	11.8283	3.30888	5.54042	8.76799	4.6728
822	case	African	13.2259	6.26609	10.3408	5.21886	7.1188	12.7389	10.9676	6.43316	8.57745	6.62072	11.0182	5.74677	10.3434	7.71571	7.43085	4.76779	3.92582	8.80091	8.08045	11.9407	9.76316	6.09607	12.7572	8.44885	9.83791	12.5333	3.55596	6.81504	9.6734	9.47727	7.12438	5.85224	8.64181	10.2861	5.90324	9.73089	6.85018	4.87367	6.31738	10.6625	5.61198	9.39752	11.7554	3.12044	5.50321	8.80125	3.58618
823	case	African	9.69521	6.75962	10.2616	6.94702	7.18157	11.5784	11.1409	6.872	8.72863	4.7629	10.1407	6.84213	9.57794	7.33393	9.00334	4.63598	4.632	10.0147	7.52525	11.6876	9.71348	9.67699	12.3463	7.37591	8.50206	12.5362	4.0165	6.31972	8.67457	9.14822	7.37883	6.4059	9.38136	9.70728	6.80803	9.22642	6.6597	4.37851	6.08004	10.8544	5.72488	7.71802	12.2024	3.51406	5.70627	8.75095	4.4738
824	case	European American	8.53718	6.30389	8.33883	9.69567	6.51757	11.5847	11.0189	6.45109	8.92563	3.48223	11.8854	5.36811	10.1608	8.57799	8.03935	4.83445	3.53262	8.40698	7.07479	11.8766	9.0293	4.00678	9.78588	6.59395	10.0391	12.5575	3.58527	7.31498	8.7235	9.21698	7.41232	5.49012	8.26	8.79581	5.85707	13.0946	6.91564	3.88169	6.35129	11.3919	5.61438	8.17231	12.0543	4.04904	5.38979	9.08236	4.8998
825	control	African	10.1417	6.24615	8.90047	10.0821	7.57505	12.0442	10.7255	5.85934	9.07333	3.72329	11.2548	6.72985	10.756	8.03953	7.86931	6.01572	3.45644	9.0835	7.33938	11.7457	8.82455	5.97954	12.0828	6.61354	9.7533	12.5154	3.65311	6.27134	8.83481	9.00462	7.3916	6.0245	9.33733	9.13791	5.98967	12.3527	6.6863	4.41439	6.88632	11.179	6.29306	9.69267	11.661	3.54665	5.71173	9.20698	5.18972
826	control	African	8.45158	5.79334	8.46808	9.54209	6.46163	11.6412	11.393	6.34423	8.26344	3.93103	10.6754	5.05287	9.15381	8.96868	7.7086	6.36232	4.47688	9.07912	7.68053	11.8845	10.0638	6.54752	12.102	6.082	9.76678	12.6772	3.36702	6.46964	8.74541	9.22919	7.49665	5.43239	8.9368	8.5913	6.27387	12.7862	7.13809	5.21747	6.50854	10.1006	5.38536	6.90637	12.0255	3.05751	5.5097	9.04957	4.00775
827	case	European American	8.70119	7.1771	8.79674	10.2328	7.29852	12.2888	10.912	5.77923	9.17649	4.30222	12.7571	6.25158	10.0345	9.10812	8.7209	6.23243	4.01907	9.00482	7.58637	12.7448	9.95614	6.89296	11.3315	7.71122	10.4061	12.6692	4.36539	6.91424	9.25399	9.21385	7.70777	5.87542	9.15172	9.45818	6.88268	13.4196	7.61448	5.19922	6.81823	10.9952	6.1299	7.25719	12.5236	3.87302	6.15323	9.46991	5.43246
829	case	African American	8.07983	6.17127	8.71623	9.06587	6.90463	10.6066	11.2215	7.35296	8.79703	3.31853	11.3026	5.57947	11.0793	8.70221	7.59967	5.20684	3.54739	8.74117	8.01706	11.6301	9.40324	4.71095	12.12	5.50354	10.256	12.4702	3.83661	6.5763	9.60083	9.53539	7.42557	5.37155	8.90833	9.14994	6.03469	12.4136	7.35325	4.7506	6.74782	10.829	5.79573	14.171	12.0108	4.07687	5.37613	9.15661	4.43824
830	case	European American	8.34337	7.16164	8.60829	9.38594	6.45947	11.1616	10.7006	6.45149	9.54592	4.30277	13	4.99844	9.75712	8.63101	9.74936	5.40069	3.89576	8.98885	7.71308	12.5448	9.57081	4.15577	9.71786	6.03047	9.82564	12.4494	3.89686	6.92898	8.38044	9.18251	7.85613	5.99585	8.96445	9.2973	5.66279	13.2483	7.82146	4.44373	7.37382	11.667	5.29215	8.13293	12.1708	4.38572	6.11236	9.52789	6.04264
831	case	African American	8.02694	7.07718	8.3992	9.96301	6.8992	11.1628	11.728	7.37329	9.76484	5.01655	14.0509	5.43009	13.5492	8.98418	9.06048	4.48831	3.58415	9.11091	7.48979	12.6384	9.76866	6.10318	11.5815	8.50587	11.2389	12.4251	3.19841	6.11917	10.7598	10.2085	7.58307	6.71501	9.25998	11.4494	5.31089	13.6112	7.97407	4.6689	7.2161	12.5792	5.55852	7.55671	12.1085	2.99616	5.74177	8.96906	5.18101
832	control	African	8.71638	6.59919	8.33668	8.0218	6.86369	9.9876	10.8137	6.3469	8.58288	4.03866	11.4337	6.51758	11.5169	8.56463	8.94671	5.67785	4.15038	8.74813	7.58316	11.3839	9.98652	13.3534	10.8729	5.66818	9.35894	12.4282	4.02938	6.77114	9.40346	9.60173	7.59971	5.18974	8.38483	9.08521	8.22092	12.4123	6.17179	4.67158	6.72485	10.3635	6.41829	7.53352	12.3718	2.66189	5.486	8.59215	4.27596
833	control	European American	7.22369	7.52245	8.82449	9.19663	7.06112	10.7381	11.2933	7.09859	9.68671	3.9105	12.2488	5.43782	10.8365	8.98887	8.92154	5.32103	3.76227	9.11943	7.89715	12.1075	10.5923	5.32841	9.49126	6.41877	10.089	12.6291	4.58056	7.36148	8.71944	8.70675	7.75852	6.13607	9.20153	9.21364	6.36141	13.1578	7.33364	5.05256	7.31357	11.2929	6.1826	7.16426	12.1018	4.79358	5.86754	9.35851	5.35747
834	control	European American	8.05884	6.8092	9.13792	9.689	7.19764	11.3755	11.2968	7.05385	8.94187	4.23994	12.1494	5.50398	9.83818	8.55518	8.44029	4.64651	3.5833	9.05399	8.00184	11.4553	11.8177	5.0758	10.0187	7.187	9.94998	12.6481	4.59639	7.0815	8.59611	9.40952	7.44704	6.0615	9.04337	9.46073	6.12662	13.5393	6.87619	4.7026	6.66099	11.1663	5.86568	7.25345	11.8217	4.48838	5.69492	9.21393	5.3975
835	control	European American	7.28664	6.5055	8.43348	8.20305	6.59402	10.9413	11.5165	7.1306	8.49926	3.31167	11.6395	5.32647	9.33062	8.67926	8.4652	4.72551	3.15319	8.71768	7.73774	11.7154	9.02016	5.88328	9.61777	6.01943	10.1179	12.4302	8.08221	6.37813	8.32125	8.89888	7.2897	7.77155	8.42213	9.2209	6.29535	12.437	6.50486	4.36893	6.34475	11.6074	5.42419	6.53811	11.7391	4.67126	5.66998	8.63851	6.05002
836	case	African American	7.34355	6.00625	8.94713	10.0163	6.93574	11.9774	11.4926	6.78191	9.10594	4.87016	11.8411	4.60724	11.5334	8.86476	7.13955	5.03092	4.00577	8.79051	7.99778	12.1899	9.79911	6.75704	11.5876	7.91094	9.8159	12.6693	3.45569	7.11008	9.6868	9.51632	7.41578	5.93453	8.64769	10.326	6.48424	12.5875	7.08155	4.64994	6.53764	11.5678	5.32713	7.91624	11.8698	4.09002	5.81335	8.68507	4.6869
837	control	African	9.0933	6.33689	8.53861	9.73428	6.77844	11.9222	11.1006	7.20645	8.56034	4.91422	11.1083	6.86251	10.7378	7.67767	9.80672	6.92655	4.00967	8.93431	7.39709	11.9909	9.96667	8.70159	11.695	6.11966	9.73761	12.5544	3.84749	6.12775	9.5869	9.82788	7.36616	5.70297	9.26099	9.09675	6.78251	11.2786	6.70367	4.69192	6.56689	10.2143	5.34141	8.27618	11.6792	3.32113	5.24551	8.37443	3.95105
838	control	European American	15.4254	7.57365	8.33562	9.25586	6.80479	12.0015	11.2356	6.87766	9.73881	7.67307	13.8966	5.44835	10.1666	8.28437	10.9977	5.15413	3.95394	9.4067	7.49947	13.1528	10.5903	5.71291	11.9066	8.08651	9.56289	12.4886	4.50598	7.23777	8.83042	10.1594	7.65978	6.76231	9.01086	9.93783	6.54851	13.2452	7.15725	4.25825	7.54248	11.9801	6.28918	9.45231	12.6823	5.03384	5.69833	9.41744	5.58658
839	case	African	12.753	6.57935	10.2292	7.75531	7.3737	12.3807	11.0081	6.44799	8.92589	5.48977	10.8452	5.93149	10.1153	7.76566	8.7773	5.41493	4.46919	9.24782	7.47222	12.3002	9.82894	10.9273	11.9888	8.0691	9.40637	12.4851	3.75004	6.00393	9.08093	10.7586	7.99322	6.54751	9.09732	9.67234	6.82989	10.1821	6.84447	5.11578	7.03608	11.1912	5.83681	13.4716	12.7744	2.74534	5.893	8.47378	4.38894
840	case	European American	7.64863	6.26088	8.82628	8.72116	6.26712	9.81906	11.144	8.06001	9.11314	4.24781	12.085	4.52397	10.3611	8.51992	7.88449	5.35501	3.22907	8.65712	7.84302	11.7283	9.15977	3.71402	10.2449	6.62683	9.67861	12.4716	3.35944	6.35871	8.00904	9.25731	7.54742	5.51879	8.85528	8.80121	5.40418	13.2143	7.34421	5.09953	7.31331	11.2306	5.52505	7.03366	12.0222	3.69897	5.34942	9.22177	4.84531
841	control	European American	8.29392	6.06727	8.93185	9.58304	6.91148	11.3856	11.1134	6.6301	8.73397	3.23298	11.9764	4.80074	9.88353	8.68695	8.26706	5.59569	3.3466	8.90245	7.38726	11.7611	9.55229	5.87605	10.4017	7.06168	10.0919	12.6635	3.64369	7.26673	7.84309	8.40554	7.22147	5.65777	8.66937	9.41255	5.67159	13.0321	7.48929	4.30082	7.41355	11.9476	5.47773	6.53318	11.8076	3.98507	5.52349	9.29363	4.79449
842	case	African	14.1227	5.82706	10.1397	8.04941	6.45987	11.7126	10.3747	5.98319	8.51599	7.91305	10.1332	5.05847	9.67866	6.98387	8.20093	5.25925	4.33106	8.85202	7.39725	12.1873	9.43099	8.67716	11.7329	5.87573	8.55511	12.44	3.39116	5.18959	8.55176	9.10979	7.07302	4.84502	8.67062	8.72245	5.91289	10.1148	6.87212	4.66222	6.0449	9.97959	5.15304	7.28915	11.4773	2.76285	5.7395	8.33479	3.92056
843	control	European American	7.57156	6.79899	8.3067	8.42055	6.2703	9.8402	10.9373	6.60753	8.9963	4.28063	12.1917	5.02562	9.75399	8.30088	7.63407	4.51124	3.60539	8.56016	7.34965	11.4925	9.50873	5.34897	9.80925	6.09973	9.36736	12.4777	3.57635	6.23214	8.83409	7.99858	7.34775	5.30751	8.92632	9.34734	5.91049	12.403	6.5744	4.60506	6.58157	11.0947	5.31995	6.61246	11.725	3.65332	5.74654	8.9522	4.82294
844	control	European American	8.85932	7.02544	8.68748	10.0396	6.84553	11.7432	11.3901	7.29258	9.0372	3.54437	12.6685	5.28988	10.0434	8.73963	8.1004	5.64489	4.00323	8.94473	7.90884	12.0379	9.6571	5.42622	10.9919	7.33443	10.2042	12.7593	3.7133	7.44516	8.95782	8.87604	7.76075	5.67496	8.34035	9.36808	6.12266	12.6848	7.19691	4.55069	6.81395	11.2013	5.55083	7.54107	11.7747	4.14682	5.66538	9.13845	5.112
845	case	European American	8.72271	5.69651	9.07205	10.4221	6.49112	11.9064	11.4494	7.24848	8.74468	3.60632	12.7397	5.05401	10.1607	8.678	8.23169	5.48062	3.5154	8.71899	7.89033	12.0694	9.64326	4.30967	10.6947	7.00898	10.133	12.6908	3.51984	6.70089	8.87192	9.10868	7.82098	5.26888	7.57394	9.37642	5.68434	13.3357	7.32356	5.21025	6.75847	11.4267	4.75387	7.59946	11.599	3.12087	5.50276	8.9156	4.27507
846	case	African	11.4473	4.76501	10.5549	8.54985	5.74382	12.3894	10.6202	4.32226	7.6717	3.92368	9.19627	3.53026	8.7383	6.60043	6.67675	5.25671	1.4443	8.53729	6.59186	11.9725	7.4186	4.41652	8.01877	6.89091	5.60428	11.3115	2.71865	4.16029	6.07017	9.9321	4.4853	6.34224	8.09179	9.5533	5.99808	8.30484	3.9151	4.26276	5.62467	8.4303	4.55087	6.49766	8.63542	1.60532	4.62743	7.71398	2.76614
848	case	African American	8.26045	6.20763	8.77922	10.1126	6.2544	11.8772	10.9682	6.7437	9.09286	4.92989	11.6081	5.1495	10.3659	8.29479	7.43982	4.50343	3.65224	8.73841	7.93472	12.2323	9.67151	7.3318	11.7718	6.98932	9.35438	12.465	3.37731	5.71062	10.3294	9.40945	7.66354	5.84096	9.38667	9.33318	6.67913	12.4901	7.29431	4.45065	7.41233	10.4426	5.39497	7.78176	12.4353	2.53293	5.42823	8.87342	4.50355
849	case	African American	15.1386	8.27335	9.29316	10.0947	7.35987	12.7578	11.3775	6.85817	9.67875	4.7897	11.6915	5.36695	10.4882	9.0569	7.22979	5.771	3.85256	9.27059	8.04413	12.8997	10.5094	7.16471	12.4249	8.56055	9.96805	12.7226	4.03944	6.81007	9.85594	10.0109	7.77032	8.3421	9.20723	10.1202	6.94977	12.805	7.84912	5.28226	7.34049	11.4621	6.12656	10.838	12.7537	4.25459	5.76066	9.58152	5.4969
850	case	African American	6.96772	6.96069	8.85124	10.158	6.67848	11.8316	11.5356	6.82711	8.94391	4.34561	11.2126	5.94027	10.7763	8.52675	8.12178	5.09238	3.13658	9.05416	8.03937	12.2032	9.82518	6.81244	12.3585	6.3273	9.64425	12.6835	4.57286	6.46791	8.60846	9.72962	7.41445	9.04145	9.31054	9.44528	6.89025	12.2325	7.10595	4.96219	6.89681	11.3867	6.1595	14.4378	12.34	3.36086	5.47918	8.95141	5.14544
851	case	African American	14.9831	5.3906	8.53236	9.76543	6.46252	12.4936	11.247	5.85524	8.48111	3.89309	12.6445	4.76495	9.42811	9.08575	7.75629	5.46088	3.65016	8.3599	7.81463	12.4857	9.55419	6.34498	11.0845	7.58335	9.31268	12.5607	2.78393	6.31922	8.09541	9.23495	7.00347	5.14067	8.33831	9.66824	6.35415	12.4858	6.39459	4.16668	5.9634	9.60706	5.22237	8.07451	11.8526	3.28915	5.4654	8.3217	3.96015
852	case	African American	8.27683	6.91632	8.81372	9.58712	6.82956	11.8442	10.9296	6.44452	9.16286	8.6712	10.9836	5.06009	10.1047	8.33504	8.24149	5.504	3.6368	8.92187	7.92732	12.1541	9.95207	6.14198	12.0488	7.25017	9.37391	12.5627	4.16553	6.25315	8.49606	8.85404	7.59632	5.67736	9.25303	9.62579	6.49646	13.0691	7.1918	5.14656	7.33616	11.2437	5.83064	7.68223	12.3655	3.84184	5.90259	9.27023	4.78588
853	case	African	13.1027	6.68989	9.94247	7.86888	6.83622	11.7355	10.7776	6.3338	8.74851	5.52446	10.6711	5.98939	10.5299	6.76817	9.75526	4.19896	4.16338	9.06286	7.45781	11.9077	9.40723	9.76	12.1624	7.45922	9.4173	12.499	3.61008	6.28584	9.05813	8.85921	7.52299	7.4296	10.6329	10.7658	6.5875	9.9154	7.23219	5.04864	6.38207	10.7367	4.92849	9.77989	12.5648	4.91456	6.16261	8.88968	4.35444
855	control	African American	7.68485	6.14599	8.27904	8.02165	6.33839	9.31924	10.9286	6.6326	8.83435	3.5694	12.7496	5.91434	9.90818	8.73535	9.13035	5.22944	3.74304	9.18571	7.56204	11.3297	9.75148	6.12228	10.2361	5.13183	9.46255	12.5422	3.87149	6.29503	9.34847	8.80496	7.38926	5.2226	8.7557	9.03697	6.03028	12.5733	6.80657	4.99224	6.49157	10.1656	5.29918	6.83	11.6015	3.35092	5.81788	9.0105	4.6388
856	case	African	15.6213	7.14697	8.92978	9.5152	7.02393	11.9852	11.1911	6.25851	9.31069	11.682	11.9309	6.73348	11.3343	7.63364	9.7431	4.52567	3.9113	9.48965	7.90873	12.6412	10.9014	7.16834	12.4861	8.09341	9.66369	12.7028	4.37863	6.43648	9.45741	13.8444	7.81458	6.27732	9.55099	9.96193	6.68826	10.7696	7.49284	5.5893	7.21273	11.6552	6.40028	14.1183	12.7881	3.56195	5.26423	9.08056	4.75839
857	control	European American	9.01611	7.09777	8.64923	9.65026	6.2347	11.4368	11.135	6.77696	9.23965	4.10727	12.6501	5.52358	10.4997	8.76497	9.07117	4.47502	3.74818	9.01446	8.06603	12.2766	9.00871	4.96814	11.9291	6.78283	9.74091	12.6159	3.86723	6.17204	8.54672	8.44833	7.82269	5.84817	9.152	9.59214	5.9407	12.9445	7.79286	5.39758	7.43513	11.737	5.78003	7.19585	12.5089	3.85707	6.03975	9.49885	5.07128
858	control	African	8.72346	6.16574	9.87463	9.05228	6.74414	11.6487	11.0916	6.04616	8.49297	3.62473	10.9149	5.72313	10.0829	7.83782	11.1268	6.44206	4.20181	8.65493	7.65192	11.6633	9.00331	7.3823	12.0136	5.13201	9.37082	12.5909	3.47456	6.47402	7.91198	9.23468	7.3503	5.9241	9.19384	8.57633	6.71561	9.9977	7.33496	5.04085	7.04806	11.141	6.00294	7.84302	12.0531	3.55807	6.09659	8.82865	3.96844
859	control	African	9.17232	7.32759	8.37889	8.99363	7.118	11.9269	11.1898	6.27011	8.81299	4.61122	11.0672	6.38007	10.8808	8.04192	9.12285	4.87124	4.20569	9.18146	7.86596	11.7784	10.1507	6.67021	12.3397	6.495	10.1396	12.5958	4.70916	7.3222	8.6935	9.2655	7.6031	5.46138	8.98435	8.80762	6.74224	12.8513	6.92574	4.65376	6.71436	10.8088	6.27629	7.73686	12.0799	3.8576	5.52851	9.26148	4.84623
860	control	African	13.2103	6.71644	9.20639	10.0716	7.24613	12.8061	11.3864	6.39897	8.96095	5.20163	11.2826	6.12681	10.533	8.71727	9.38924	5.31576	3.85296	9.2444	7.90364	12.1081	9.82552	7.45504	12.3567	7.5664	9.89705	12.833	3.50124	6.60128	8.94615	9.84866	7.95186	5.77069	8.7674	9.26736	6.86652	12.4807	7.10743	5.07233	7.35603	11.0551	5.87723	10.0378	12.2221	3.7502	5.84304	9.42882	4.60373
861	case	African	15.6209	7.5332	9.01928	7.64494	7.5969	12.435	11.3763	6.91691	9.49702	9.03928	13.4292	5.96521	11.2196	8.70966	8.24957	4.97674	4.85323	8.98694	7.86861	13.0683	9.88149	8.34564	12.7897	7.75202	9.53988	12.7357	4.17907	7.39	8.21566	10.8478	7.99144	6.13032	9.54247	9.36258	6.86918	12.0556	7.19642	5.45195	7.04024	11.3149	5.71208	12.1228	12.9604	3.75201	5.53331	9.29949	5.49248
862	case	European American	15.5415	8.42549	8.65867	9.79134	6.89812	11.9572	11.2399	6.04191	10.5598	5.8666	12.9639	6.14921	10.2912	8.55191	10.4522	6.74984	4.01437	9.65646	7.66441	13.4212	10.3403	6.99988	11.7133	9.59906	10.1674	12.8452	4.38781	7.09031	8.58608	11.3666	8.09058	6.95626	10.2329	10.6789	6.64911	13.5392	7.75453	5.09545	8.56425	12.3873	6.75519	11.1109	12.7917	5.52509	5.99954	9.7535	6.11283
863	control	European American	15.4397	6.09511	8.79993	10.1585	6.82348	12.4769	11.4483	6.17452	8.89604	5.49515	14.0011	5.42002	11.3177	8.28879	8.37032	6.46507	3.7923	9.01605	8.12963	12.7695	9.68779	6.83842	11.465	8.88788	10.187	12.7337	3.39046	6.44872	9.03261	10.5719	7.86716	5.44076	8.27204	9.82377	6.17305	13.2461	6.94068	4.74205	6.48377	10.9467	5.27266	10.3415	12.0231	4.20117	5.64035	9.04341	4.36174
864	control	African	12.129	5.62898	9.33483	8.97942	7.21967	11.8846	11.0101	5.58029	8.5886	5.67609	11.0272	6.01917	11.3806	7.91992	7.37522	5.12413	3.37842	8.30208	7.64752	11.029	9.5581	7.02886	11.766	6.93876	9.86546	12.4954	3.32083	6.74493	9.25985	10.1655	7.18172	5.90975	9.10858	8.64935	5.99066	9.82828	7.20137	4.65087	5.73039	10.3159	5.25544	11.0659	11.9467	2.91105	6.02856	8.96584	3.79865
865	case	European American	7.89885	6.33004	8.30661	9.49651	6.5066	10.9926	10.946	6.47558	8.73653	3.11338	12.0572	5.24064	10.6651	8.51607	7.62973	4.68874	3.37641	8.36553	7.73455	11.7995	8.5706	5.33384	10.8375	6.81746	10.0396	12.4128	3.45474	6.15062	7.81222	8.88752	7.38787	5.61705	8.25261	8.70595	5.70353	12.7561	6.94422	4.68227	7.09314	11.2536	5.45421	6.78267	11.6191	3.04374	5.63378	9.03568	4.80718
866	control	African American	8.88514	7.03508	9.00861	9.15247	6.53218	11.2517	11.2253	5.93808	9.09918	4.49995	11.214	5.6413	10.4087	8.8384	8.78555	6.36571	4.19956	9.27566	7.74003	12.1932	9.67517	6.36589	12.2221	6.28253	10.1747	12.6145	3.56901	6.49221	8.42388	8.91358	7.60788	5.63943	9.1046	9.49369	6.77482	12.7287	7.28247	4.96104	6.83441	11.4517	5.99161	7.92156	12.4971	4.10103	6.38514	9.21258	4.45615
867	case	European American	8.44773	6.43201	9.00952	8.18341	6.62338	9.84575	11.1052	7.69859	8.93371	5.3231	12.2846	5.3719	10.182	8.55921	10.4343	4.94918	3.44822	9.18444	7.91583	11.6492	10.7286	5.36598	10.5927	6.24636	9.84207	12.5862	3.65992	6.93361	8.20204	8.64685	7.63842	5.73772	8.42566	9.64696	6.49089	13.2932	6.93093	4.27512	6.93147	10.4226	5.55658	7.07506	12.0635	4.12964	5.6189	9.08521	4.6026
868	control	European American	7.80491	5.90202	9.02508	9.94582	6.77017	11.5988	11.5377	7.37191	8.89092	3.64829	12.261	5.11416	10.0166	8.81275	7.25607	6.03992	3.47729	9.0586	7.28194	12.0034	10.0443	5.06853	11.0619	6.49594	10.4597	12.59	3.80901	6.69028	9.29139	8.66402	7.50477	5.726	8.71435	9.65028	6.348	12.6924	7.27786	4.83964	7.01598	10.8934	5.53148	7.04512	12.1487	4.22638	5.88396	8.97161	4.51695
869	control	African American	13.5519	5.77413	8.88343	9.6152	6.8955	12.2576	10.8608	5.91934	8.67113	4.59015	11.2313	5.15469	9.83202	8.67668	7.36449	4.76089	3.60929	8.76826	8.14638	12.4016	9.62099	5.85839	12.2199	7.33395	9.63436	12.5495	3.29014	6.58558	8.96966	9.60088	7.47035	5.41647	8.30445	9.45723	6.17399	13.1814	6.43482	4.78415	6.42527	10.8708	5.05542	8.57394	12.2447	3.07357	5.5915	8.70199	3.74045
870	case	European American	8.08204	6.69745	8.66966	9.46848	6.34867	11.0855	10.9571	6.34448	9.4724	4.41382	12.0079	5.31959	10.0491	8.44238	10.2288	6.14159	3.61254	9.01958	7.28638	11.9743	9.64502	6.15238	10.2038	5.00778	10.0642	12.4393	3.63303	6.33207	8.82649	8.7781	7.4614	5.81365	9.25471	9.80341	6.64154	13.222	7.10555	4.47849	7.29687	11.2878	5.90528	7.57864	12.5379	3.81931	5.76869	9.1138	4.91171
871	case	African American	9.33926	7.69491	8.63764	9.92962	7.17846	11.5424	11.1659	6.26712	9.65684	3.91548	11.3402	6.6921	11.1241	9.03773	8.3953	5.65671	4.22975	9.27669	7.66021	12.6878	10.5137	7.57177	11.8785	7.39191	9.71393	12.5635	5.47806	6.74014	6.69956	10.2628	7.69497	6.24551	9.8386	9.8543	7.20873	12.5694	7.35366	4.59762	7.18012	11.5843	6.77496	8.31138	12.4012	4.21143	5.94583	9.71317	5.56718
872	control	African	8.72651	5.5914	8.47938	9.28573	6.1501	11.8641	11.0823	6.63568	8.40984	4.3827	11.0574	5.12465	10.5849	8.3185	8.59057	4.78349	2.91584	8.66926	7.78512	11.665	8.59675	6.35611	12.3027	6.6251	9.30616	12.5373	3.29683	6.39015	9.47009	8.91882	7.38768	5.50402	8.49903	9.01791	6.372	12.6989	6.42753	4.95962	6.47272	11.2357	5.11534	8.61653	11.8987	2.9194	5.44696	8.37492	3.87738
873	control	European American	10.377	7.14017	9.02017	7.51791	6.73791	12.0515	11.3576	6.65858	9.35689	5.5896	12.3845	6.17281	10.5532	9.04949	8.42616	5.88798	3.18255	9.08119	7.48038	12.3158	10.4994	5.78202	11.3771	8.28025	9.79106	12.5674	3.96148	6.81291	9.34985	9.43266	7.527	5.78994	9.32022	10.07	6.88377	12.9244	7.029	4.86075	7.02898	11.5474	5.92325	8.62415	12.2407	3.80115	5.8186	9.18818	5.35001
874	control	European American	11.1423	6.52738	8.7404	9.5704	6.42856	11.9526	11.1467	6.23374	8.87646	4.3141	12.5532	6.25959	10.4803	8.47651	7.81605	4.29247	3.66589	9.03737	7.72292	12.1539	9.51878	5.10372	10.2921	7.25807	9.92534	12.5569	3.42244	6.67178	7.96228	9.18822	7.75673	5.36503	8.52942	9.70192	6.53221	12.5679	7.03179	4.58735	7.05928	11.181	5.70553	8.16131	12.1005	3.48551	5.78851	9.17049	4.60283
875	control	African American	7.99707	5.28985	8.23529	9.36168	6.05859	11.2296	11.3226	6.50164	8.23193	3.44192	10.7074	4.44897	11.2376	8.22781	7.50119	4.52186	3.05198	8.08893	7.92106	11.575	8.4522	5.16961	12.1343	6.08613	9.57589	12.5824	2.86952	6.25103	8.94212	9.02761	7.06447	4.87773	7.80738	9.18564	5.72226	12.4269	6.27649	4.66523	6.39556	10.8355	5.30518	6.58195	11.9691	2.85877	5.40726	8.44844	3.53775
876	control	European American	7.72993	6.52482	8.40209	10.0229	6.59118	11.7346	11.4545	8.2395	8.61326	2.86119	11.6232	4.73028	10.1738	8.54436	7.34215	5.18417	3.46801	8.27758	7.69509	11.8992	9.19204	4.57252	10.3626	6.64934	10.2632	12.5077	3.88359	7.27519	8.2744	8.65776	7.31913	5.33143	8.42509	9.05258	6.08157	13.2245	6.69657	4.71583	5.91419	10.8913	5.08522	6.73408	11.6511	3.4628	5.48421	9.02406	4.54086
877	case	African American	9.47259	6.6625	8.05255	10.1241	6.46098	11.805	11.1557	5.9521	8.41567	3.17483	11.1019	5.32803	10.0879	8.26605	8.35117	5.91851	3.54388	8.36271	7.48183	12.1677	9.93594	6.0804	11.5438	6.93182	9.20448	12.5048	3.79774	6.84146	9.14322	9.36292	7.3407	5.17712	9.0719	9.21368	6.36189	12.9398	6.62056	4.05224	7.04751	10.9928	5.89143	8.77993	12.4401	3.12971	5.69521	8.83956	4.38486
878	control	African	7.49055	6.59759	8.81892	9.27594	7.22081	11.4066	10.8363	6.13078	8.60192	3.53277	11.1251	6.4337	10.0495	8.61935	8.5576	5.53092	3.75822	8.45022	7.71188	11.6169	9.86429	6.5658	12.3242	5.9186	9.96544	12.5062	4.14129	6.37118	9.17857	9.87685	7.4717	5.77595	8.14298	8.90906	7.08535	12.9014	6.65486	5.45516	6.49683	10.7654	5.23364	8.12373	12.5405	3.02269	5.78182	8.54008	3.99329
879	case	European American	6.64772	7.05676	8.65587	9.32923	6.0984	11.0886	10.8575	5.24817	9.21541	3.87876	11.7976	5.14986	10.2415	8.12548	8.61826	4.37831	3.31467	8.50112	7.47311	11.4798	9.61046	4.88821	11.3981	6.69629	9.44443	12.4525	4.61206	6.79965	8.36748	8.67241	7.17905	5.42427	8.79179	9.10313	5.94717	12.1718	6.55631	4.4163	6.86056	11.9696	6.22387	7.35904	11.5019	4.16973	5.37283	8.99793	5.08324
880	control	European American	7.70655	6.30226	8.93381	7.12283	6.63487	10.7565	10.7663	6.29937	9.14334	3.62111	12.1165	4.70962	9.67769	8.30621	7.93413	4.74906	3.97149	8.99478	7.71787	11.5025	10.4799	5.1742	10.0224	6.61737	9.88418	12.3997	3.73284	6.64349	8.99618	8.38762	7.43232	5.40622	8.58722	9.40488	6.13826	13.3147	6.92053	4.46975	6.46379	11.2565	5.64927	6.26867	11.8438	3.98287	5.61704	8.8697	4.55467
882	case	European American	9.76388	6.83111	8.46727	9.98575	6.36308	11.5784	11.4917	7.05939	8.75586	5.65387	12.1968	5.4758	9.57094	8.81665	7.88238	5.52727	3.22882	8.79725	7.71465	12.1927	9.80002	5.80975	11.4507	8.0895	9.61182	12.6106	3.35619	6.34066	8.78992	8.3207	7.33154	5.78405	8.36803	9.70193	6.26918	12.648	6.62795	5.06753	6.61117	11.6294	5.33417	7.04746	11.9553	3.79358	5.34181	9.16421	4.75286
883	case	African	14.0945	5.27988	10.3611	5.92305	6.67858	12.9886	10.7527	5.03994	8.2937	6.38536	9.92053	3.12898	8.52418	7.16005	6.84	3.88945	1.87478	9.26425	6.87856	12.1928	9.36553	3.82373	9.75028	8.17468	6.19994	11.6497	3.43056	5.14231	8.03101	10.1212	4.33941	5.83091	9.12503	9.61895	6.12788	8.93525	4.80926	3.23236	5.34105	8.69491	5.44425	9.22838	9.45337	3.10666	4.76322	8.04149	3.52396
884	control	African	12.6333	5.7633	8.5134	9.5459	6.30434	12.2641	11.3217	5.53759	8.21463	3.90651	10.499	4.91065	9.52053	8.04904	7.23175	4.85031	3.32726	7.93292	7.64904	12.2693	8.73197	6.80488	12.0599	7.5093	9.434	12.5403	3.1261	6.33523	9.13558	10.2987	7.40282	5.1618	8.51958	8.92789	6.4635	12.5299	6.43317	4.46195	6.00193	10.6275	5.32215	9.81374	11.7808	2.35151	5.45308	8.51866	3.73345
885	case	European American	8.3481	6.83779	8.31025	9.43935	6.43284	10.9616	10.9117	6.84	9.0077	4.12593	13.8724	5.46206	9.81491	8.09016	10.0193	4.76747	3.34718	8.81098	7.46717	11.9675	9.44863	4.91159	10.3553	6.84303	9.93791	12.4447	4.19711	6.55391	8.64968	8.914	7.56681	5.48042	9.01548	8.79874	5.95905	12.7872	7.16909	5.00748	6.91294	11.0302	4.99718	8.22405	12.0279	4.18276	5.6625	9.10064	4.80014
887	control	African	9.53793	6.28879	8.8551	8.83686	6.8937	11.2874	10.9401	5.49723	8.53279	3.81311	10.713	6.34535	10.0205	7.5048	8.52682	5.26092	3.39545	8.58153	7.47866	11.4313	9.69889	6.74969	12.2639	6.42041	8.99738	12.5629	3.71835	6.47288	9.17923	9.08784	7.1168	5.88185	9.30334	8.82082	6.16666	9.79689	6.92915	5.00422	6.18284	10.301	5.08557	8.18676	11.8355	3.30249	5.43691	8.97545	3.67947
888	control	African	10.1329	7.30658	8.46872	9.13835	7.54021	11.8699	11.0224	6.99264	9.03632	4.19295	10.7068	5.94196	10.5551	8.73916	10.8623	4.74712	4.61386	9.39987	7.38156	12.1188	10.4266	8.11997	12.3135	5.81332	10.0854	12.6296	4.54663	7.20088	9.63122	9.31137	7.53696	6.46598	9.78924	8.88836	7.27728	13.4211	7.52629	5.18531	6.82941	10.8993	6.05603	9.01001	12.0894	3.86043	6.0913	9.09326	5.00509
889	case	African American	8.63514	6.59025	8.83296	10.0415	6.89942	11.7538	11.6522	7.05337	9.28659	3.50987	12.7689	5.49581	11.112	9.05337	8.92539	6.09774	3.22883	9.10967	8.4001	12.0238	10.2165	6.22064	11.8791	6.85739	9.92463	12.6846	4.04528	6.63613	9.31556	9.94371	7.71368	6.15114	8.59848	9.71184	6.72847	13.5053	7.15351	4.44399	7.22251	10.6559	5.62245	8.22243	11.9808	3.79573	6.16253	9.15146	4.90856
890	control	African American	8.66989	5.66985	8.48493	9.47382	6.6891	11.7338	11.4891	6.5231	8.5915	3.182	10.8756	5.02102	10.735	8.61521	6.40721	4.5217	3.20397	8.57191	7.67842	11.6075	9.41657	6.28314	10.861	6.68571	9.42522	12.5631	2.7496	6.72644	9.20733	8.94665	7.45663	6.30549	8.13174	8.99298	6.16254	12.7694	6.68758	4.53149	6.83119	10.6868	5.39816	6.60729	12.0612	3.04077	5.48329	8.74844	3.92122
891	control	African American	8.07115	5.19009	7.81763	9.71393	5.62377	11.2989	10.8355	5.55656	8.04396	3.53272	10.8208	4.00994	9.70706	7.80378	6.82015	5.64062	3.56931	8.45669	7.42813	11.8362	8.29357	5.34155	11.8338	6.26898	8.76126	12.2332	2.20207	5.57426	8.53626	8.76397	7.18648	4.9242	7.9766	8.72596	5.61036	12.0505	6.0586	3.79708	5.99663	9.74797	4.79982	6.5319	11.7941	2.31498	5.2234	8.39152	3.84173
892	control	European American	14.7298	6.90142	8.67755	9.4367	6.84538	12.2838	11.3175	5.88091	9.10137	3.49269	11.8789	5.248	10.1721	8.72742	8.82233	5.11708	3.80006	9.41989	7.95873	12.8034	10.5477	6.99862	11.3766	8.53883	9.88219	12.7281	4.33799	6.6918	7.69286	9.96381	7.48715	5.97775	9.31006	9.50438	6.84189	12.9265	7.33735	4.8188	7.07412	11.113	5.92269	8.50562	12.7064	4.45933	5.51911	9.38992	5.33849
893	control	African American	8.44979	5.7084	8.29212	9.65221	6.26075	11.7254	11.2226	6.33389	8.65774	4.80115	12.8784	4.73024	10.3408	8.53396	7.92468	4.77577	3.16535	8.69557	7.75598	11.7721	8.92138	5.7096	10.9538	7.84899	9.62363	12.501	3.19058	6.59893	9.06469	8.38418	7.52209	5.36285	8.59577	9.91682	6.19508	11.7945	6.7721	4.23655	7.12784	11.051	4.79711	6.58463	12.1146	2.95735	5.42424	8.84771	3.62464
894	case	European American	8.72875	6.77663	8.2678	9.68182	6.48971	10.5368	11.6695	7.49643	8.98919	4.74357	12.0684	5.90723	10.2114	8.85468	8.2516	5.72536	3.35463	8.89745	7.78492	11.8013	9.67614	6.08106	10.6318	5.94482	10.4424	12.6131	3.8032	6.30569	9.65869	8.11371	7.35888	5.58462	8.67024	9.62901	6.35738	12.0039	6.34995	4.75568	6.89158	11.4374	5.83568	6.52762	12.2443	3.47067	5.7233	8.94253	4.76215
895	case	African	11.4338	6.91631	9.40429	4.91978	7.00615	11.8271	10.8266	6.3671	9.87479	4.79576	11.2181	6.40973	10.0536	7.7638	10.2166	4.47471	3.59412	9.35264	7.48227	13.1008	8.73185	4.86789	12.7339	7.47417	9.13943	12.5769	3.82026	6.33812	9.65199	8.91197	7.16604	5.82443	9.67105	9.56567	5.99863	9.75933	7.35533	5.18217	7.66291	10.8618	6.00653	9.0677	12.6499	3.71921	5.64829	9.45082	5.08488
897	case	African American	7.8297	6.80574	8.72341	8.31206	7.01451	10.1655	11.0103	6.74711	9.07089	3.94324	11.3768	5.39935	9.62994	8.92045	9.34997	4.58065	3.72153	9.10808	7.57482	12.096	9.78324	5.62052	10.7305	5.53109	9.61238	12.5221	3.6852	7.04537	9.39889	8.9695	7.67406	5.99574	8.77814	9.0387	5.90504	12.3112	7.69396	4.91051	6.98692	11.8094	5.98425	7.3782	12.1071	4.18995	5.58985	9.24676	4.93811
898	control	African	15.1683	7.06861	9.01068	9.147	7.29257	12.4307	11.0916	6.21572	9.1733	8.81537	11.2925	6.57699	9.94564	8.70807	8.37468	7.0967	4.43091	9.23855	7.8592	12.4576	10.5511	8.19587	12.3104	8.61627	9.94759	12.593	4.11257	6.43338	8.49847	11.7937	7.59108	6.42867	9.30717	9.51484	7.39013	12.0551	7.52472	4.89279	7.21146	10.3552	6.38482	12.8966	12.2884	3.64512	5.76221	9.01649	5.0524
899	case	African	15.7092	6.54483	10.258	8.27	7.70061	12.4792	11.4347	6.49007	8.83569	8.72341	13.4321	6.51046	10.7147	7.31602	9.64628	5.24986	3.75601	9.50252	7.65551	11.8974	10.9329	10.1179	12.8414	8.07742	9.69976	12.6573	3.9614	5.91746	10.3029	12.3174	7.93967	6.63203	9.17532	9.86014	7.23282	10.1116	7.15321	5.64934	6.84412	11.6614	5.83621	13.0838	12.0161	3.60204	5.94628	9.12995	4.1403
901	case	African American	7.09587	6.33795	8.50312	8.641	6.12411	10.1058	11.3715	7.35473	8.84326	4.91339	12.8566	4.90427	11.0024	8.94041	9.19299	4.39105	3.17628	8.84648	7.63963	11.6755	9.19539	5.30825	11.651	6.20677	9.60359	12.54	4.06955	6.29529	9.52925	8.60541	7.44674	5.34834	8.66835	9.18625	6.24679	11.9391	7.04146	4.85529	6.42674	11.4393	5.70417	6.93694	12.4882	3.18608	5.33566	9.04131	4.71577
902	control	African American	14.5107	7.34639	8.69146	9.81021	6.94821	12.2512	11.3052	6.11073	9.1982	5.57266	11.4266	7.00909	11.2056	8.2771	8.60454	5.74956	4.48896	8.85347	7.75369	12.0284	10.3616	7.55491	12.063	7.98227	9.71106	12.4702	4.80425	7.17288	9.54991	10.1888	7.58091	5.56674	9.71451	10.1301	6.97352	13.0693	7.95617	5.71655	7.49326	10.1094	5.96917	9.33916	12.0381	3.85074	6.11655	9.54606	5.45441
903	control	African American	7.73406	6.17723	8.6095	10.0439	6.20509	12.0397	11.0656	6.33262	8.7622	4.08537	10.975	4.61973	9.99795	8.61945	7.569	4.84126	3.68741	8.5341	7.66078	11.9175	9.64173	6.20648	12.3285	7.01441	9.75956	12.4838	3.48416	6.66388	9.78195	8.80806	7.43858	5.27398	8.9116	9.21169	6.16499	12.7419	7.01742	4.62582	6.82733	10.3242	5.48769	7.24567	11.8729	3.94306	5.44535	8.97202	4.43589
904	case	European American	8.21845	5.57749	8.37087	8.61211	5.45598	10.067	10.5694	7.02261	8.7701	3.49474	11.7934	4.22625	9.79832	7.70679	7.47901	4.00236	3.54803	8.11727	7.3568	11.4054	9.14576	5.06713	10.5114	5.9077	9.32874	12.2122	2.92038	4.83062	8.21686	8.51992	7.03027	5.11362	8.05922	8.60673	5.11413	13.0275	6.88986	4.53729	6.64533	11.4776	4.41006	6.52435	12.1026	3.18253	5.14718	8.44224	3.72972
905	control	African	10.2391	6.45086	8.95316	9.63426	7.11155	11.8799	11.0476	6.04326	8.6889	4.18537	10.8605	6.26441	10.6467	8.84636	9.86682	6.80301	3.66045	8.84667	8.05279	11.7551	9.61663	7.20996	12.2631	7.19921	10.0238	12.5568	6.09021	6.57413	9.6773	10.0998	7.54164	5.84629	9.02633	8.96063	6.83046	12.5446	7.03625	5.03891	6.603	10.2396	6.05822	9.57198	11.8558	3.55202	5.71351	8.99632	4.27953
908	case	African American	7.95889	6.82529	9.18585	10.1267	6.72675	12.318	11.6222	7.2148	9.15535	4.47595	11.7522	4.77661	10.7059	8.54141	7.23624	4.46073	3.66404	8.9997	7.85696	12.6092	10.28	4.88161	12.3216	7.55283	10.1602	12.6504	3.766	6.34028	8.2626	9.1572	7.6744	6.14787	8.87297	9.77563	6.13213	13.2091	7.3155	5.156	6.68173	11.7751	5.75943	7.8152	11.9928	3.96433	5.71784	9.32249	4.87271
910	case	European American	8.10849	6.25892	8.44471	5.73463	6.50716	8.35873	10.4136	7.00648	8.76627	3.95034	11.7548	5.15245	9.60909	8.58789	8.36178	5.07639	3.35353	8.46654	7.72216	11.3642	9.56803	4.63355	9.78148	4.7145	9.77509	12.41	3.70386	6.84633	7.22685	8.4681	7.2734	5.57576	8.49111	8.47692	6.04467	12.8893	7.04128	4.85774	6.31327	10.8902	5.275	6.7477	12.127	3.29488	5.35972	8.84991	4.43213
911	control	European American	7.77227	7.17596	8.35482	9.33574	6.39018	11.1103	11.4444	7.60954	9.20579	3.00968	12.1046	6.08915	10.1404	8.58281	8.75388	4.8906	3.76231	8.92903	7.66785	12.212	9.88236	4.92499	10.3573	6.70011	9.71152	12.5652	4.24561	6.33458	8.42128	8.87869	7.58452	5.78895	9.02545	9.01761	5.65418	13.1212	7.4404	4.0061	7.31231	11.1489	5.54032	7.27669	11.9987	4.0111	6.3196	9.3253	4.81929
912	case	European American	8.72545	6.52443	8.53767	9.69363	6.85134	11.4044	11.1014	6.48442	9.35963	3.9797	11.8856	5.46961	10.2112	8.70811	7.86732	4.90343	4.14021	8.59861	7.64521	11.8459	10.6681	3.91104	10.2519	7.19909	10.1745	12.6987	3.74589	6.72069	8.69306	9.28865	7.61092	5.7724	8.56655	10.1009	5.92324	13.1872	7.22943	4.56285	6.70387	11.2914	5.00864	7.54296	12.5078	3.87966	5.80761	9.26502	5.05411
913	control	African American	7.87371	6.44099	8.37683	8.45642	6.29447	9.77204	10.9756	6.29891	8.86494	3.87352	11.0169	5.51017	9.35986	8.53666	7.91749	5.1139	3.60182	8.97281	8.10612	11.5527	10.2711	6.0043	11.848	6.38547	10.0156	12.5582	3.86687	5.91522	9.13342	9.0617	7.52296	5.67863	8.74813	9.11835	6.33366	12.8824	7.29571	4.9811	7.08283	11.2962	5.58473	7.18788	12.0191	3.76723	5.6306	9.11263	4.80465
914	control	African	10.3463	6.04369	8.97949	10.5336	6.75753	12.6917	11.521	6.3616	8.59632	4.11507	10.7658	4.9795	11.2538	8.10907	7.90556	5.65177	4.14951	8.34568	7.96912	12.5651	9.28832	6.82697	12.2881	6.86551	9.95693	12.635	3.31213	5.79756	9.62656	9.9975	7.71145	5.50385	8.9594	9.09997	6.505	9.34254	6.99029	4.81674	6.64581	9.92953	5.47794	8.8398	12.753	2.72388	5.42161	8.61252	4.04013
915	case	European American	8.10658	6.35481	8.75939	7.8492	6.52169	9.80499	10.4315	5.95183	8.8752	6.68179	11.8069	5.76197	9.98214	8.21662	7.49759	5.73319	4.65044	9.39235	7.53652	11.2564	10.4706	7.85682	9.65861	6.03348	9.31335	12.2261	4.0064	6.38696	7.75706	8.47819	7.33082	5.53694	8.17522	9.35763	6.63245	13.1249	6.62475	5.08682	6.5199	10.247	5.43279	6.48444	12.053	3.64294	5.75832	8.82149	4.7737
916	case	European American	8.66037	6.63983	8.87941	10.096	6.69832	12.0295	11.5496	7.00792	8.75137	4.99251	11.0022	4.84395	10.2159	8.35631	7.84549	5.31118	3.27213	8.74041	7.68134	12.0106	10.6483	5.94853	11.4393	7.97113	9.37864	12.6334	3.19435	6.94963	8.88083	8.29476	7.10777	6.38776	10.1111	10.3117	5.62301	13.4913	7.31864	3.5085	6.3358	11.8283	5.4675	7.12	11.3989	4.32904	5.3535	8.89544	4.84307
917	case	European American	8.67891	6.23316	8.57658	9.59644	6.2438	10.7586	11.1642	7.36803	8.90107	3.94651	12.6367	4.80729	10.1636	9.0838	9.25176	5.01592	3.30851	8.64416	7.75579	11.7965	9.43165	5.91192	10.9334	5.90423	10.0728	12.5315	3.28363	6.16379	8.78902	8.70251	7.53844	5.42532	7.96085	9.48328	6.69124	12.2651	7.14628	4.71079	7.04193	11.1375	4.94464	6.94739	11.9061	3.66858	5.80104	8.71564	4.78149
918	control	European American	7.93367	6.30433	8.48715	9.80893	6.70063	11.2354	11.2147	6.83742	8.74982	4.75572	11.945	5.30145	10.0692	8.4828	7.76179	4.67511	3.39188	7.97274	7.82162	11.6447	9.4868	5.2109	10.3917	7.06546	10.2042	12.6426	2.96941	7.33945	9.12473	9.09075	7.35296	5.5798	8.22432	9.59238	6.08385	12.8623	7.19514	3.85467	6.38645	11.1964	5.42203	7.10168	12.1479	4.19739	5.50307	8.91805	4.47601
919	case	African American	8.92426	6.39686	8.10027	10.0576	5.99316	12.0071	11.0122	6.14131	8.72806	3.84147	12.2976	4.53227	10.7597	8.52586	7.145	4.09671	2.82982	9.18026	7.49147	11.7654	10.2611	6.79371	11.4571	7.43761	9.37816	12.5728	3.3258	5.95907	9.46556	8.82836	7.35073	5.02509	8.35019	9.53405	6.20217	12.3933	7.21402	4.58666	6.26122	10.1336	4.75691	7.24339	12.2692	3.05553	5.34195	8.65682	3.6764
920	control	African American	7.0457	5.73193	8.62053	9.35745	6.65699	11.5171	10.9049	6.03221	8.17541	3.75772	10.3807	6.07775	10.13	8.36211	8.9801	5.20957	3.25893	8.88122	7.80076	11.4588	9.21846	6.34973	11.9279	6.55	9.43027	12.6576	3.34315	7.24594	9.34946	10.0187	7.17506	5.57408	8.64301	8.78516	6.75638	12.6833	6.75935	4.31932	6.24489	11.0757	5.11694	8.16137	12.1522	3.38978	5.36941	8.46098	3.69628
921	control	African	11.3095	7.16586	8.85504	10.272	7.90959	12.6517	11.544	6.30696	8.95057	4.65777	11.0639	6.54718	10.5362	8.74873	9.68647	5.29156	4.21223	8.91367	7.75185	12.8698	9.74963	7.23392	12.3737	7.57776	9.81036	12.6151	4.30388	6.62572	10.0019	10.1499	7.86436	6.24294	9.46442	8.78702	7.02806	11.8964	6.79765	5.23312	6.95754	10.9225	5.91942	8.84051	11.9438	3.24056	5.74691	9.01542	5.13406
922	control	African American	9.17171	6.47102	8.96989	8.82074	6.80391	11.315	11.6361	7.50266	9.09592	3.83162	11.4693	5.86236	11.4985	8.84467	8.18523	5.21295	3.68963	9.19872	7.53864	12.3106	10.2746	7.17015	12.6711	6.23013	9.81111	12.5581	3.83764	6.52344	9.15094	9.57366	7.82449	5.7201	8.92391	9.27713	6.6412	12.304	7.17075	4.8032	7.32107	11.2207	5.63828	7.96048	12.1439	3.78097	6.06348	9.27303	4.7593
923	control	European American	7.70232	6.1694	8.54547	9.8514	6.64598	11.5834	11.4679	7.21192	9.11033	4.2484	12.2048	5.52769	9.58444	8.77591	8.3981	5.13003	3.65279	8.80137	7.49544	12.0202	9.05483	5.19822	10.9313	6.66222	9.87228	12.3821	3.59163	6.60081	8.08538	8.76923	7.502	6.11213	8.82285	9.56255	6.21152	12.7153	7.05623	4.48888	7.1237	11.4026	5.55915	7.48361	12.1908	4.15396	5.71257	9.19929	4.89426
924	case	European American	8.01561	6.38872	8.42276	8.81252	6.04092	11.0601	11.1924	6.83443	9.14506	3.97534	12.7382	4.9155	10.1348	8.6768	7.27274	4.97016	3.33169	8.30224	7.65958	11.5882	9.74276	4.49445	10.3473	6.12866	10.2058	12.4733	3.2914	6.35063	8.00593	8.2132	7.51265	5.39855	8.50284	9.55338	5.98723	12.49	6.7863	4.59074	7.23752	11.5584	4.94431	6.55523	12.1081	3.54504	5.6089	9.06548	4.48261
925	control	African	14.3478	7.74306	9.03529	9.07033	7.78475	12.8161	11.5103	6.16193	9.32729	14.8811	14.035	7.15922	10.6292	8.241	9.35455	5.51815	4.70842	9.54666	7.80817	13.1343	11.2561	9.06634	13.7386	9.55834	9.93778	12.7759	4.60724	7.44065	9.53202	14.6738	8.02123	6.5886	9.70813	10.3819	7.78577	11.8531	7.40063	5.64546	6.98249	10.7956	6.3724	14.179	12.366	3.68686	5.63114	9.03555	4.86356
926	case	African American	8.21439	7.61405	8.54915	9.92382	6.94432	11.6874	11.1369	6.44619	9.59336	4.72842	12.2651	6.26134	11.1175	8.40534	9.01954	5.65024	4.13833	8.93937	7.75804	12.4062	9.77319	6.43811	12.3147	6.16342	10.0208	12.4673	4.31013	6.41417	9.69441	10.2166	7.78292	6.25246	9.67486	9.53832	7.02848	12.8555	7.39355	5.21199	7.50275	12.232	6.8897	13.7824	12.4325	4.03484	5.8726	9.39836	5.13886
927	case	European American	8.314	5.87733	8.33204	9.24327	6.58535	10.5263	10.7443	7.0787	8.8271	3.54837	12.0127	5.22579	10.4001	7.99977	8.82995	5.30259	3.62319	8.28764	6.85325	11.8687	9.25017	4.82341	11.1466	5.94623	9.69817	12.3485	3.29703	6.48279	7.23196	8.83797	7.39578	5.18021	8.21741	8.73615	5.95796	12.3537	6.72944	5.03361	6.75054	10.834	4.97919	6.91303	12.2684	3.42925	5.84765	8.83197	4.53847
928	case	African American	7.26232	6.32487	8.24656	8.50079	6.97126	10.4583	10.1805	4.99882	8.62005	4.02599	10.6822	4.92962	9.69153	8.15799	7.54552	4.71894	3.70229	8.60505	7.44017	12.7388	10.1627	6.99988	11.4063	5.98158	9.20321	11.7516	3.77287	6.0721	8.13957	8.54182	7.43111	5.34716	9.10146	7.95708	6.10322	12.9527	6.40348	3.48493	6.53328	10.8587	5.69309	6.33079	11.8047	3.14141	5.34972	8.43724	4.3758
930	case	African American	15.6548	7.84889	8.49763	9.05918	7.11073	11.9461	10.9042	7.24201	10.159	5.8045	13.1434	5.13263	8.87385	8.87356	8.75517	5.69847	4.833	9.93353	7.80514	13.2691	11.0667	5.47311	11.6115	8.11785	9.67945	11.8966	3.5831	6.80311	10.4101	9.89113	8.04593	6.66935	9.97705	9.72295	6.47956	12.5252	8.23799	5.54474	7.78045	11.3585	5.89113	12.5317	12.5212	5.18846	5.91384	9.71593	5.62339
931	control	African American	15.7187	6.6542	8.66671	9.60132	7.00896	12.5174	11.1743	5.45691	8.83574	5.27564	12.3811	6.39575	11.0238	8.79857	8.74936	5.68701	4.01099	8.95105	7.79939	12.8866	10.15	6.48968	12.3928	8.50094	9.64905	12.516	3.91324	7.3541	9.35915	10.1038	7.61446	5.61032	8.30751	9.91201	6.60471	13.1327	7.12906	4.83545	6.86584	10.9469	5.88957	13.3851	12.0061	3.89575	5.57192	9.05662	4.92201
933	case	African American	8.7869	5.91322	8.77387	8.56184	6.77204	11.1659	11.2369	7.40632	9.16515	5.3218	11.9752	5.49847	10.1648	8.85096	7.76284	4.46109	3.38633	8.82537	7.93137	11.8227	9.08456	5.56166	11.8417	7.80358	9.74791	12.6802	3.45798	7.04493	9.26604	10.0632	7.59664	5.67326	8.91986	10.0716	6.28114	12.9419	7.05944	5.02954	6.95445	11.48	5.20398	8.24827	12.3424	3.70966	6.13625	8.54121	3.20308
934	case	African American	14.3132	6.69685	8.67959	9.77717	6.64552	12.193	11.016	6.87519	8.67138	4.27366	12.5028	5.89378	11.4713	8.73103	9.15621	4.61033	3.78722	9.03483	8.19564	12.6147	10.8338	6.5604	11.5952	8.17894	9.56578	12.564	3.52506	7.31699	9.23193	9.42284	7.58908	5.38105	8.77949	9.41457	6.33382	13.6898	6.88136	5.01801	6.49218	11.3242	5.41457	7.3775	12.3716	3.59552	5.36148	8.85211	4.56428
935	control	African	7.1365	6.00712	9.25269	8.78687	7.54353	10.64	11.1774	6.92849	8.44625	3.78625	11.0067	5.96452	10.4212	7.86826	7.94797	5.69443	3.78302	8.16137	7.77071	11.2405	8.83755	5.89698	12.3933	5.56081	9.30462	12.5504	3.16184	6.75336	7.71655	8.94473	7.36673	6.44257	8.77347	8.73388	6.35997	9.73295	7.68048	5.23856	6.35056	10.208	5.55291	6.71688	12.2544	2.8389	5.29129	8.65313	4.03112
936	control	African American	9.23774	6.24755	8.82216	9.45625	6.66382	10.859	11.3275	6.60262	8.84967	4.08775	12.8143	5.90587	9.56027	8.49473	8.19571	5.3199	3.62887	9.00207	7.97958	12.0506	9.28304	6.13644	11.2517	6.25435	10.2241	12.6195	3.39823	6.8562	8.74655	9.39789	7.81767	5.93914	8.26289	9.00055	6.2178	13.0271	7.35319	4.32467	7.35774	10.7073	5.3921	7.43359	11.8592	3.44994	6.05354	8.96865	4.46563
937	case	African	11.989	6.33568	10.5871	6.82132	6.53454	12.0287	10.9975	5.17853	8.75964	4.16057	10.2541	4.72815	9.59017	7.1914	7.46951	4.73089	2.03485	9.07179	7.56219	11.8961	8.72439	5.02675	11.2277	7.0876	6.51945	12.0938	3.44941	5.35314	8.39532	8.35232	7.27705	7.4019	9.53894	8.93746	5.77078	9.23018	6.8384	4.09955	6.85858	10.0519	5.96568	8.62853	12.5506	2.98001	5.40921	8.63168	4.10239
938	case	European American	15.3089	6.9495	8.86046	6.74177	7.2778	12.6669	11.4953	7.05557	9.09103	4.16956	12.5046	6.40496	10.8302	8.78799	7.92299	5.60885	3.71751	9.14633	8.16241	12.6703	9.85377	6.03873	11.2948	7.96478	9.8089	12.73	3.81359	6.75538	9.46351	9.36186	7.93625	5.78208	9.32929	9.4957	6.46365	12.9207	7.38115	4.35691	6.98803	11.4402	5.77168	8.15605	11.8888	4.1439	5.89793	9.40028	4.82114
939	case	European American	8.7154	8.10385	8.51575	8.83362	6.48904	10.0185	10.9052	6.23262	10.0275	4.44759	12.1659	6.09754	9.80652	9.35113	9.54971	7.75158	3.5474	9.44708	7.87699	12.7692	9.78085	5.05098	11.6734	6.13993	9.64352	12.5374	4.61542	6.90696	8.4562	9.04157	7.84057	6.53092	9.73386	9.38028	5.92141	12.8583	7.67673	5.1117	8.13822	12.2815	6.46653	8.24268	12.7189	4.61301	5.99697	9.71884	6.01947
940	case	African American	9.6329	6.74918	8.86023	10.8982	6.89585	12.6165	11.7186	7.15121	8.97879	4.03456	12.869	5.051	11.5937	9.50518	8.67867	6.29311	4.11754	9.53144	8.21088	12.6467	9.64787	7.72556	11.9032	8.36962	10.1291	12.5122	4.03698	6.85436	10.5149	9.83585	7.80923	6.08059	9.01046	9.97317	6.79503	12.676	7.75688	5.5383	6.72148	10.7467	5.83215	9.46136	12.612	3.75499	5.82748	9.23014	4.70992
941	control	African American	13.656	6.19698	8.63128	9.69437	6.68668	12.2334	10.8325	6.01087	8.88027	3.74825	12.8788	5.10024	11.0608	8.84619	9.50535	6.00326	3.53777	9.56924	8.23211	12.2709	10.6079	8.49061	11.1338	8.18026	10.2188	12.5348	4.20905	6.5728	7.75793	9.7484	7.8794	5.68886	8.91509	9.4688	6.28808	12.297	6.9457	4.6948	6.46386	10.8958	5.48212	7.85262	12.0926	3.8438	5.64785	9.11592	4.45793
942	case	African American	8.23028	6.74119	8.49246	9.53538	6.61864	11.6936	11.1143	6.46836	9.00844	4.55061	11.6259	5.25307	11.4517	9.03611	8.05468	5.82388	3.45708	9.18818	7.69634	11.9068	10.0681	5.6305	12.5552	6.7679	9.027	12.481	3.90295	6.42282	8.52222	9.57185	7.47316	5.8692	9.00265	9.03062	6.35935	13.0404	6.97334	4.59647	6.95386	10.9482	5.57722	8.20059	12.3493	3.51782	6.76634	9.00496	4.33966
943	case	European American	8.79788	6.915	8.77481	8.30266	6.52203	10.3672	11.0624	6.34494	9.00309	4.74319	11.8567	5.40807	10.7114	8.48969	7.17085	4.62329	3.64631	8.51578	7.79509	11.7772	9.77907	5.77308	10.6385	6.51411	9.7162	12.6475	3.82426	7.02683	7.46419	8.49047	7.42751	5.68704	8.84491	9.47448	5.72157	12.9455	6.81237	3.67233	5.86017	11.129	5.68494	7.01198	11.538	4.40311	5.32739	9.38021	4.68227
944	control	European American	10.0018	6.46912	8.77791	10.5537	7.01333	12.4269	11.6743	7.34457	8.93321	4.30877	11.8291	4.95348	11.1446	8.44333	8.27005	4.6574	4.01962	8.74607	8.1507	12.2965	9.57135	6.00766	10.4971	7.63234	10.5277	12.5366	3.82358	6.92096	9.1143	10.1001	7.61395	5.97618	8.66816	9.48132	6.1104	13.0936	6.63602	4.50593	7.15379	11.5114	5.77793	8.64909	11.9104	3.94883	5.57693	9.04976	4.67809
945	case	European American	15.5646	7.61444	8.75361	10.2664	6.94459	12.2869	11.4602	7.24028	9.68298	5.15877	12.491	5.06947	10.6907	8.34534	8.41059	5.21655	4.32186	9.37397	8.19176	13.1088	10.6295	6.05161	12.0022	8.68614	10.1503	12.7661	5.22141	6.97956	8.94953	10.2838	7.96556	5.93944	9.32151	9.89701	6.81954	12.9195	7.36133	4.56464	7.30446	12.041	5.86719	10.3142	12.4748	4.98388	5.94055	9.56419	5.79702
946	control	European American	8.0304	6.37355	8.62847	9.61078	6.59433	11.3813	11.3336	6.79547	8.7853	3.61092	12.1539	5.2966	10.3052	9.02257	7.33579	5.03743	3.28931	8.89165	7.64425	11.863	10.128	5.12779	10.6694	6.48364	9.65252	12.5129	3.30571	6.3028	8.11269	8.69972	7.31971	5.53504	8.65651	9.432	6.40835	13.0769	6.8749	4.42062	7.1608	11.0328	5.37053	7.20951	11.9185	3.97621	5.51976	9.10092	4.46537
947	control	African	8.84429	5.75485	9.26649	9.53148	7.02329	11.7218	11.3785	6.77283	8.23875	4.13226	11.8036	5.71098	11.2118	7.92866	9.45319	5.59161	3.87757	8.73366	8.1566	11.9678	9.87113	7.01255	12.4385	6.67689	9.13378	12.5948	2.9442	6.36457	10.3556	9.52143	7.48025	5.52424	8.51621	9.08795	6.38665	10.9126	6.81254	4.54195	6.62155	10.2871	5.43898	12.8957	12.4929	2.42375	5.63091	8.40489	3.65803
948	case	African	15.6291	6.62547	9.15896	10.4448	7.32308	12.8274	11.773	6.76703	8.85865	10.5937	11.1816	6.71489	12.7068	8.72138	8.3378	5.55518	3.98659	9.11512	7.68758	13.1824	9.75271	7.20841	12.8076	8.84339	10.0066	12.6598	3.71756	5.8764	10.3192	13.5285	7.81993	5.78821	9.07151	10.0769	7.09082	12.4919	7.16787	5.84146	7.1873	11.2819	6.17498	14.2153	12.3024	3.4162	5.58483	9.02233	4.62473
949	control	African American	8.07849	6.60577	8.79323	5.59471	6.69412	7.90956	10.8658	7.35186	8.94124	3.63189	11.8489	5.13157	9.31716	9.28005	8.65415	6.70047	3.64205	9.18889	7.64421	11.5124	10.066	6.19047	12.5031	4.64857	10.3085	12.5275	4.61801	7.36513	9.20833	10.8269	7.38663	5.54265	8.8908	8.59623	6.20529	12.9364	7.52303	5.11839	6.68759	10.6257	5.39194	10.4278	11.7704	3.79926	5.83897	9.09116	4.5853
950	control	European American	8.68458	5.81913	8.44129	9.41887	6.48301	12.0334	11.3189	5.90809	8.86035	3.37252	12.0683	5.74039	10.7505	8.58515	7.62508	4.5929	3.48053	8.86147	8.02023	11.9916	10.3761	5.71571	10.7599	7.11495	10.559	12.5936	3.57733	6.49174	7.97728	8.76341	7.49942	5.60393	8.59706	9.43115	6.1068	12.9756	6.63544	4.79135	6.62076	11.5159	5.43727	7.54795	12.4028	4.05515	5.44979	8.99085	4.8752
951	control	African American	15.1076	7.64789	9.22959	9.27894	7.4045	12.2198	11.2047	6.88176	9.45678	5.10948	13.4569	6.61942	8.88829	9.36427	8.45196	7.23169	6.22065	10.5416	7.85049	13.1398	11.1352	9.1147	11.7253	8.4264	9.3801	12.5923	4.62866	6.27678	10.2446	9.7979	7.79223	7.10096	9.58554	10.4326	7.30679	13.2177	7.88391	5.16889	7.61618	10.7986	6.17798	8.65725	12.6621	4.71863	5.95335	9.8885	5.17167
952	case	African	15.0133	6.03074	9.82718	8.37674	7.16536	12.471	11.1134	6.09349	8.61933	6.07081	11.214	5.98407	9.1153	7.58875	7.7832	4.81254	3.78402	9.1594	7.56408	12.2945	8.43028	11.2403	13.0424	8.45632	9.93326	12.6767	3.55707	5.91474	8.8633	10.1625	7.98426	5.77653	8.73935	9.35229	7.15652	9.57704	6.75482	5.41379	6.45206	10.3662	5.86602	10.6926	12.285	2.50948	5.70389	8.70512	3.90556
953	control	African	13.2384	6.78444	9.29311	9.38644	6.96383	12.2379	11.052	5.51478	8.99036	5.11879	11.2074	6.23174	9.55292	8.82465	9.31474	5.94277	3.78791	9.18291	8.04487	12.5442	9.9989	7.20349	12.0867	7.60987	9.7476	12.5639	5.13983	6.55659	9.50726	10.3985	7.97664	5.71531	8.91684	9.12549	6.7292	12.8468	7.26476	4.72852	6.94714	10.6831	6.08109	10.4847	12.0036	3.3021	6.09815	9.2681	4.84358
954	case	African	11.4617	7.52468	11.0671	6.87123	7.00148	12.1569	11.0084	5.38787	9.01177	7.97245	9.64187	5.8096	7.3585	8.01074	9.00792	5.72909	2.55711	9.35758	6.40304	12.7015	9.25489	4.6925	9.77527	7.51028	6.27582	11.7816	4.81089	3.84979	7.33743	7.2196	4.27472	7.31737	9.66923	11.7528	7.34019	8.59425	5.70661	4.95072	8.44278	11.8045	6.07983	7.70221	11.3097	2.36786	4.39168	9.10069	4.59952
955	case	African American	14.4378	6.32734	9.15435	9.10745	7.43225	12.4783	11.5706	6.01015	8.76074	4.48364	12.1128	5.50193	10.1638	8.59988	7.86559	4.90602	3.7061	8.70484	8.25999	12.4943	9.27585	6.36525	12.3193	7.5593	10.4488	12.6218	3.72405	7.08551	9.72368	9.27329	7.7426	5.64828	8.57767	9.53493	6.73075	12.1707	6.98777	4.72912	6.77859	11.21	6.1378	8.62409	11.8092	3.34452	5.72374	8.90676	4.34392
956	control	African	12.7377	6.46839	8.48816	9.46784	6.46555	12.2681	11.3906	6.35769	8.6314	4.318	10.9371	5.47163	10.4755	8.16219	8.805	5.30593	3.95753	8.48896	7.17498	11.9554	9.48299	7.11409	12.2634	6.07384	9.46492	12.5314	3.29122	6.65957	9.69481	9.9647	7.63366	5.4386	8.64062	8.822	6.67773	11.6058	6.92352	4.65456	6.71759	10.7669	5.53318	9.11729	11.9133	3.31615	5.78094	8.80213	4.00165
957	control	African	13.0423	6.60424	8.77974	9.35137	7.20701	11.6666	10.7138	6.27536	8.52817	6.67779	10.9013	5.86933	10.4692	8.41844	9.76558	6.21749	3.56538	8.67185	7.60558	12.0008	9.61662	8.11589	11.8891	7.1396	9.66213	12.4479	3.93327	6.78589	8.018	11.1657	7.25496	5.72881	8.64169	8.77053	6.64841	11.8555	7.11681	4.4209	6.74884	10.3201	5.75867	11.5612	12.0354	2.75272	5.59054	8.71106	4.22785
958	case	European American	9.37211	5.68996	8.10354	9.88748	6.10845	11.2031	11.1052	8.65842	8.42497	3.73877	11.1408	4.95554	10.4043	8.52526	7.71707	5.01686	3.29181	8.03495	7.81405	11.6863	8.97375	5.73377	10.0382	7.62685	9.96984	12.3517	3.1158	6.65274	8.8124	8.78363	6.86659	5.11918	8.50254	9.06559	5.98848	12.8946	6.40604	4.04338	6.37842	10.7878	5.23005	7.73852	10.9828	3.56034	5.02714	8.43949	3.94597
959	control	African	13.0143	6.6061	8.95512	9.66592	7.10534	11.6441	10.8639	5.70496	8.47739	5.63914	11.3214	6.54211	9.6506	8.49785	11.4246	4.86472	3.69572	8.47998	7.65222	11.9137	10.1973	7.42793	12.7596	8.30621	9.80788	12.5797	3.66304	7.51757	9.20726	10.512	7.08459	5.67995	8.95444	9.02826	6.38846	12.2813	7.11438	4.72877	6.68321	11.203	5.72381	10.6681	11.7105	3.27047	5.348	8.87233	3.91819
960	case	European American	13.5568	8.21845	9.39043	10.3109	7.85847	12.1779	11.3413	6.83138	10.078	5.67268	12.6073	7.24128	10.123	9.00585	9.69639	8.04662	4.26956	9.27851	8.12858	12.9372	10.9906	6.76823	11.8592	8.49764	10.012	12.5465	5.53382	7.06306	8.7564	10.2041	7.93423	6.4871	9.9133	11.0764	7.3355	12.5074	8.07583	5.18786	8.05541	11.7434	6.48055	10.003	12.6553	4.84635	5.97476	9.96005	6.62493
961	control	African	11.911	6.40073	10.9148	5.72451	7.24003	12.379	10.9267	5.14712	8.6503	5.95444	10.0045	5.32196	8.72062	6.18205	8.40567	6.65552	2.24734	9.07048	7.66088	11.9762	9.7471	7.09437	10.793	7.05245	6.93824	12.2807	3.46645	6.07017	8.57455	11.539	5.26622	6.91024	9.86501	9.54287	5.74119	9.98318	6.69565	4.96457	6.74866	9.5252	5.74981	10.3105	11.0757	2.87735	6.25688	8.88855	4.03139
962	case	African	11.0199	6.93019	9.22565	8.65429	7.81616	12.1604	10.6734	6.27032	8.67371	3.83686	10.443	5.45692	10.9181	7.7667	8.76486	4.49089	4.137	9.6572	7.22441	13.9189	10.3531	13.5098	12.2194	6.86969	9.27409	12.5371	3.43596	6.80128	8.60141	8.36771	8.01431	5.37326	9.32354	9.07352	9.16185	10.9828	7.43734	4.76639	6.38927	10.0012	8.3267	6.93486	12.6048	4.13166	5.13909	8.44333	4.36838
963	case	European American	13.2526	6.60602	8.91959	9.79187	6.52614	12.2802	10.9889	6.01294	9.01659	4.81121	12.4788	5.16734	10.0097	8.55602	8.41247	5.61273	3.80981	8.91719	7.98464	12.5115	9.50417	6.9358	10.4131	7.67649	9.96186	12.5614	3.56733	6.29052	8.78301	10.0307	7.79859	5.87377	8.41337	9.65703	7.302	12.9064	7.13206	4.18143	6.73622	10.993	5.67891	8.78515	12.1086	3.89918	6.00843	9.2479	4.93068
964	case	African American	12.4312	6.53453	8.43416	10.3152	6.91124	12.2849	11.299	6.91142	8.85729	4.29035	12.4002	4.69922	11.5711	8.52091	9.06955	5.20686	2.896	8.46142	8.03052	12.2432	9.9938	5.8525	11.7132	8.81287	9.81419	12.4821	3.35914	6.70762	8.94127	10.2957	7.60049	5.58907	8.30778	9.21463	6.11783	12.6416	7.14839	3.98678	6.62635	10.8033	5.1792	10.0148	11.8908	3.07458	5.49636	9.13568	4.44594
965	case	African	12.6468	7.30858	8.84191	8.5636	7.85707	12.4539	11.5306	7.4107	9.07104	6.83822	11.4329	7.08965	11.8455	8.79956	9.37683	5.2849	4.09026	9.09641	7.83663	12.1419	10.4416	8.54655	13.0417	8.19164	10.4564	12.5018	4.90078	6.52584	9.7457	11.4333	7.66444	6.03673	9.62088	10.0383	7.69853	12.7631	6.99925	5.39798	6.72844	11.8241	6.4828	14.2073	12.2645	3.18559	5.6001	9.0463	5.07401
966	case	African American	7.97825	6.26206	8.69117	8.53226	6.44099	9.78346	10.5681	6.2242	8.53249	3.60082	11.2113	5.85212	10.1392	8.75047	7.94762	4.69798	4.53616	8.06256	7.86977	11.4526	8.9154	6.50416	11.4923	5.54349	9.91441	12.3319	4.11539	7.03359	8.75723	8.78521	7.40092	5.20951	8.27382	9.00529	6.29586	13.0008	7.03373	4.75625	6.62609	11.1546	5.95942	6.57189	11.6636	2.46643	5.69336	9.10031	4.70604
967	case	African	12.0413	6.86564	10.7676	6.83993	7.19929	13.092	10.8752	7.04956	8.8669	5.3111	10.6409	4.76379	9.46456	6.05156	8.99094	5.50944	2.50504	9.05739	7.75455	12.1463	9.55322	5.72136	11.721	6.49548	7.51868	12.2632	3.94772	5.48677	9.05936	9.3789	7.1442	7.11829	9.42004	9.40605	6.20931	9.85059	6.61495	4.97755	6.70908	10.7458	5.71245	7.649	12.4531	3.5413	5.41835	8.72305	3.76024
968	case	European American	8.10321	6.06844	8.59537	10.2511	6.9502	11.3962	11.1464	5.7653	8.90469	4.97488	12.6001	4.70637	11.7116	8.65202	7.75555	4.87317	3.36944	8.51104	7.76009	11.4645	9.42321	4.90988	10.8394	6.72404	9.99288	12.48	2.7466	6.45965	8.84454	8.45939	7.2662	6.17823	8.07561	9.48613	6.16436	12.7805	6.4724	4.63977	6.99802	11.6341	4.94303	7.27674	12.3725	3.26081	5.78988	8.57953	4.25139
969	case	African American	13.5243	6.05474	8.4497	9.89286	7.36185	12.5539	11.2914	6.33956	8.87603	4.61097	12.7119	4.03499	10.1637	8.5687	8.14819	5.40717	3.71083	9.79711	7.5886	12.4312	9.77643	5.89272	12.4293	7.26905	9.70541	12.5962	3.53604	7.07376	10.0786	9.72885	7.67422	5.85121	8.67527	9.21335	6.60862	12.9716	7.04499	4.45721	6.21994	10.607	5.69836	10.1116	11.4932	3.74338	5.49636	9.04469	4.68383
970	control	African American	7.39229	6.14715	8.22298	9.34356	5.50127	11.0184	10.9232	5.70155	8.64171	6.09313	11.3915	4.22958	9.90425	8.02047	7.46712	4.44837	2.76371	8.72045	7.23251	11.1327	9.3292	5.16501	10.4035	6.39807	9.13472	12.2696	3.23564	5.36738	9.31232	8.71321	7.21385	5.17554	8.47485	9.28529	5.89485	13.0828	6.74148	4.26567	6.92167	9.83847	5.22852	7.15949	12.1464	2.57645	5.31008	8.58746	4.32464
971	control	European American	10.1294	6.30236	8.40528	9.89138	6.82355	12.0979	11.4444	6.41219	9.09958	3.21045	13.182	5.97667	10.7345	8.26112	8.07506	5.2783	3.15892	8.93651	7.43803	12.3333	11.2895	5.22984	11.0833	6.93716	9.96235	12.5951	3.94444	6.21871	10.272	9.16301	7.48388	5.5607	9.01541	9.49677	6.16089	12.5876	7.14289	5.17549	6.67843	11.6869	5.72062	8.48117	12.3178	3.73861	5.65174	9.10877	4.70005
972	control	European American	7.18638	6.38182	8.61847	7.56544	6.18785	8.99554	11.2569	7.29647	8.52719	4.19349	11.6177	3.97647	9.30028	8.67896	8.80363	4.72695	3.10726	9.14478	7.56255	11.4968	9.55322	6.09654	10.1686	6.41322	9.70988	12.6397	2.82003	6.1293	10.055	9.19236	7.14151	5.61493	7.86563	9.74932	5.80709	12.5596	7.08495	4.66365	6.34252	10.4486	5.1307	6.616	11.7253	3.69142	5.44977	8.85271	4.55137
974	control	African	6.16588	6.74744	8.95147	7.81231	8.23051	10.9986	10.9654	5.89505	8.24652	3.41247	10.3187	5.81291	9.35884	7.58628	7.55841	4.29535	3.51743	9.05151	7.60174	11.2492	10.0858	9.27585	11.9652	6.22321	9.41238	12.5783	4.00781	6.85741	9.09725	9.47577	7.07795	5.44326	8.215	8.4136	6.61726	9.51825	6.96375	4.89996	5.83863	10.9887	5.42436	6.88081	11.696	2.67918	5.95524	8.5965	3.82094
975	case	European American	12.93	5.74762	8.09875	9.74557	5.95012	12.157	11.4942	6.96255	8.01822	3.8892	11.1272	3.98529	8.996	8.1001	7.69829	4.06383	3.27161	8.05956	7.69375	11.7985	9.00761	5.00318	10.1705	7.77671	9.56357	12.6407	2.81652	5.73943	8.61651	8.89125	6.8122	5.08711	7.43817	9.14586	5.14261	12.6654	6.28234	4.27002	5.65522	10.268	4.77038	7.61817	11.4994	3.08167	5.01576	8.20668	3.95795
976	case	African American	7.60469	5.77916	8.00859	9.72549	6.07221	11.5762	10.8738	6.45488	8.12134	3.99723	11.1179	3.98541	10.1967	8.03265	7.49291	4.07101	3.16081	8.30203	7.57786	11.5077	8.763	5.29533	12.2052	6.50431	9.12098	12.5682	3.29018	6.18051	9.3376	8.54457	6.79127	4.79839	8.20493	8.61082	5.36132	12.2422	6.5356	3.98376	5.44668	10.5503	4.83407	7.62402	11.2282	3.02433	4.87054	8.44781	3.95834
977	control	African American	7.90035	6.58672	8.3164	6.81819	5.97117	7.92665	10.8857	6.73776	9.16565	5.34443	11.2551	5.29228	9.75765	8.4486	9.23452	4.73287	4.03495	8.85502	7.60634	11.3361	9.88746	6.77704	11.8651	5.47823	9.38564	12.3277	3.21493	6.012	8.62149	8.25937	7.38152	5.69505	9.26773	9.41272	5.98043	13.4059	7.03732	5.42424	6.88224	11.8366	5.62745	7.14432	12.4801	3.55618	6.04618	8.84876	4.43072
978	control	European American	6.87701	6.72948	8.98641	7.52603	6.70026	8.80019	11.3087	7.64117	9.07462	3.00331	11.6425	4.9358	9.55854	9.21695	8.13378	4.97601	3.60723	8.78445	7.62772	11.4456	9.21092	4.91444	9.9895	6.09195	9.705	12.6346	3.83165	7.18894	9.20161	9.12443	7.55576	5.83183	8.66236	9.1123	6.16304	12.604	6.78691	4.386	6.94377	12.0035	5.67332	7.1028	12.2269	4.13414	5.49892	9.24855	4.92846
979	case	African American	8.81126	6.20633	8.76182	10.114	6.09977	12.1189	11.1794	6.6172	8.89626	4.24871	11.3844	4.35705	9.92565	8.64862	7.41615	3.90842	3.18319	8.92848	8.03274	12.083	9.85515	5.80228	11.6343	7.18045	9.94235	12.5118	2.87093	5.25687	8.84389	9.09333	7.66011	5.56965	7.96195	9.26505	5.86588	12.2348	7.17552	4.94072	6.13623	11.6666	4.78875	7.62806	12.0674	2.50267	5.34807	8.91939	4.57326
980	control	European American	10.3141	5.99386	8.52919	9.95839	6.75507	12.1282	11.4704	6.83741	8.73073	3.26343	11.7167	5.08617	10.3038	8.59208	8.38461	4.71248	3.38228	9.15102	7.8862	12.0378	10.3072	7.94388	10.7801	8.1605	10.0858	12.6204	3.13034	6.25203	8.36707	8.50988	7.49592	5.68187	8.41873	9.52075	6.3476	12.9815	6.75953	4.56486	7.07184	11.7944	5.5421	7.20098	11.8055	3.80692	5.36301	9.01287	4.30715
981	control	African	9.65598	6.40414	8.56168	9.68495	7.31464	12.4553	11.3163	7.26703	8.9527	4.22152	10.892	5.60198	11.1698	8.53945	8.21967	4.64613	4.409	8.79436	7.98338	12.154	9.15908	8.30566	12.0798	7.31004	9.72849	12.5166	3.90936	6.29344	9.69109	10.1797	7.69089	7.56873	8.73151	9.10239	6.48477	12.0134	6.92667	5.35356	6.59606	11.0196	5.69241	14.1567	12.1744	3.39044	5.50102	8.78583	4.14067
982	control	African	10.7591	7.11855	8.9602	8.93428	7.8879	11.3609	10.9819	6.19105	9.37375	5.52205	10.9945	7.59669	9.27878	7.98337	9.3105	5.82069	3.79823	8.96267	7.35172	11.9812	10.6391	8.05943	12.3926	6.90144	9.11868	12.5368	4.16349	6.48867	9.27877	10.4765	7.38237	6.02761	9.89464	9.71554	7.33225	11.3451	7.2333	5.28149	7.07171	11.1279	6.34705	11.4747	12.5324	2.76447	6.13053	9.17603	5.13407
983	case	African	13.0004	8.75102	8.44836	7.89305	7.39266	11.7874	11.1093	6.2845	10.3669	6.3159	12.4049	7.01814	10.4289	8.5013	13.1948	5.80253	3.65293	10.0169	7.36162	13.1685	10.5047	8.11653	12.4966	7.78669	9.52944	12.5058	4.7579	6.2065	9.94724	11.4677	7.71373	7.00725	10.5626	9.94894	7.53102	12.9468	7.70852	5.58416	8.17577	11.832	6.23746	11.5632	12.6386	4.66637	6.0827	9.42193	5.56326
985	case	European American	7.6725	6.27925	8.83711	10.1247	6.5389	11.7706	11.11	6.50608	8.71131	3.33446	13.0496	5.65268	10.6118	8.07578	8.34908	5.48562	3.52604	8.61134	7.95603	12.105	9.87823	6.00934	10.8644	6.47663	10.0641	12.5807	3.56497	6.81155	9.07023	8.76965	7.66663	5.64941	8.80858	9.35311	6.07718	13.5677	7.52967	5.29116	6.86548	10.204	5.69425	7.26354	12.1787	3.53121	5.68755	9.16579	4.41973
986	control	African	8.35252	10.3039	8.83243	8.54584	7.26822	10.2334	10.7348	6.02461	11.3654	5.20484	12.0991	7.39682	9.9993	8.58267	12.4426	6.28706	4.03973	9.89802	7.62282	14.2904	10.0783	5.48059	11.5833	5.83488	9.41561	12.3609	4.8466	7.21843	7.78675	8.02396	8.07401	7.86225	11.0451	10.4481	6.91902	12.1037	8.37607	5.77847	9.52878	11.3085	6.72616	7.04433	12.4247	5.42681	6.72352	10.0606	6.55834
988	case	African	11.7494	7.92784	10.6779	4.97118	8.30969	12.6381	10.7256	6.33617	9.25953	6.35803	11.1187	7.25383	9.74903	7.38111	9.17138	6.44682	4.13887	9.81417	7.89015	12.3734	11.2508	7.27282	12.1322	7.86444	8.68138	12.6465	4.81905	6.48653	8.5977	10.0639	7.28161	7.07813	9.5614	10.3537	7.62547	10.1041	7.29573	6.02749	7.41408	10.8906	6.31343	11.1828	12.629	3.85892	5.52585	9.24745	4.72205
989	case	African	8.95063	6.80921	8.71756	9.98371	7.06924	11.7236	11.5417	7.29899	9.71805	5.22345	10.9053	6.7783	10.977	8.93774	10.1323	5.90618	3.68404	9.04441	7.61372	12.3362	10.3853	7.23944	12.6295	7.17011	9.82335	12.5494	4.00587	6.64851	9.64419	9.18275	7.55291	6.28112	9.16334	9.65752	6.89289	12.923	7.47851	5.18415	7.04481	11.393	6.35361	9.82249	12.6526	4.34942	6.00758	9.28803	4.88643
990	control	European American	13.9684	5.87185	8.00337	9.16307	6.19253	11.8289	11.0838	5.5244	8.26261	3.31729	11.4545	4.70498	8.88373	8.24906	7.41739	3.91031	4.40421	8.66289	7.16528	12.1756	9.57692	6.37026	10.7015	7.91996	9.43068	12.6957	3.43844	5.97598	8.40724	8.97836	7.05542	4.95058	8.11037	9.35535	6.3517	12.3844	6.11797	4.17359	5.64107	10.4584	4.75557	7.49853	11.5589	3.22252	5.07796	8.47485	3.91242
991	case	European American	9.13931	6.64777	8.78973	9.60164	6.53297	11.3735	11.374	6.90649	9.13844	3.53406	11.6932	5.15912	9.29015	8.39032	8.64092	5.55013	4.04983	8.96334	7.74277	11.9839	10.4702	4.83973	10.1086	7.25912	10.1923	12.6496	3.94842	6.28947	8.72252	8.88433	7.48083	7.38639	8.93127	9.52362	6.11873	12.809	7.08904	4.12103	6.87443	11.6311	5.60359	8.44764	11.5669	4.13468	5.53513	9.13552	5.13991
992	control	African	9.98429	6.5684	8.37148	8.97314	7.93055	11.4881	11.0785	5.60429	8.32691	7.12602	10.8689	5.47372	9.92547	8.54014	10.1717	5.95746	3.66151	8.50815	7.33151	11.5893	9.3631	7.22484	11.9296	5.51974	9.4098	12.3532	4.03742	6.64848	8.76104	9.12534	7.12652	4.89896	9.08644	8.5775	6.5307	12.3902	6.27426	4.34197	6.51521	9.99935	5.71842	9.36073	11.8201	2.68376	5.09777	8.83624	4.10346
994	case	African	11.753	6.48392	9.6245	6.49478	6.59815	11.8472	10.2218	4.41432	9.17177	4.02736	10.9442	5.50544	10.5599	6.89164	9.82722	6.09222	3.80861	8.85817	7.24399	11.9978	8.79868	6.82996	11.17	7.99722	8.79099	12.0559	3.30426	6.44777	7.89461	9.29661	7.38204	5.34089	9.01784	9.6202	5.99184	10.1091	7.06093	4.52799	6.76293	10.2312	5.7697	8.73249	12.4662	3.1125	5.40222	8.95826	4.55912
995	case	European American	8.48689	7.75526	9.04948	9.48156	7.75951	11.5513	11.1236	6.00936	9.62286	4.44444	12.0692	7.14563	9.35824	8.96858	9.8437	5.5204	4.61385	9.83925	8.03093	12.9967	11.8741	9.09655	10.7982	7.29374	9.53224	12.6601	5.58468	6.861	6.20773	8.96885	7.84711	6.85502	9.85693	10.0038	8.55363	13.768	7.09474	5.21107	7.63693	12.2292	6.86824	7.93891	12.622	4.93379	5.83162	9.66353	5.90442
996	control	European American	9.44044	6.14209	8.8301	10.0585	6.499	11.7147	11.4037	6.65219	8.96424	4.48848	11.9816	4.61327	10.5965	8.42145	7.45104	5.00249	3.26135	8.40446	7.99805	12.1549	8.75202	5.01413	10.7429	7.61384	10.3715	12.5235	3.40313	6.28799	9.14923	9.90437	7.35767	5.2135	8.5781	9.57945	6.11705	12.6453	7.09331	4.13816	6.13472	12.0525	5.35136	9.50178	11.4254	3.10101	5.93041	8.97628	4.31293
997	case	African	10.3328	5.67812	10.3224	6.76587	6.86865	12.2184	10.9685	6.51524	7.90699	3.36853	10.5131	4.35566	11.4539	6.85003	8.32235	5.20822	3.08057	9.27658	7.14771	11.9887	9.0528	7.75028	12.0305	7.10061	8.98689	12.2222	3.00578	5.07617	9.13356	8.01477	7.04833	6.16611	9.05492	9.55107	6.19747	9.11158	6.75597	3.7431	6.64863	10.1275	5.2724	7.3622	11.448	2.88985	5.20387	8.19304	3.54652
998	control	African	8.86666	7.47473	8.73125	10.1549	7.19814	12.6631	11.6375	6.47444	8.65994	3.56281	10.4062	6.37177	10.2454	6.79368	7.99518	5.1904	3.81486	9.0509	7.91972	12.6682	9.60505	9.81378	11.2854	6.71737	9.60701	12.6501	3.47267	6.66143	8.84172	12.264	7.61516	5.64365	8.97227	9.55117	6.67829	13.1995	6.82714	4.8708	8.04889	11.432	5.74485	11.0491	11.9372	3.35543	5.89981	8.9385	3.76751
999	control	European American	6.83046	6.03163	8.44217	7.41374	6.08437	8.37078	11.0625	7.1163	8.82639	3.37341	12.1112	4.48749	10.4408	8.32473	7.73236	4.63456	3.55213	8.47217	7.51485	10.8423	9.97386	4.74011	10.4278	5.55336	9.7921	12.4805	3.47155	6.40587	8.19978	8.73745	7.15798	5.46736	8.13962	9.15721	5.75507	12.513	6.43165	4.31128	6.46441	11.239	4.95216	6.99034	11.813	3.80338	5.28355	8.68817	4.52265
1000	case	African American	9.7758	6.58986	8.83587	10.19	6.96912	12.4646	11.4093	6.65157	9.18166	4.05215	11.0804	4.68612	10.1016	9.06951	6.97161	4.99403	4.05313	8.5143	7.48852	12.3649	9.49262	6.23872	12.09	6.62809	9.99437	12.5602	4.11849	5.49339	10.2402	10.3493	7.69647	5.51064	8.33351	9.33615	6.37319	12.6451	7.18377	4.74739	6.80791	10.5648	5.17327	8.68875	12.0644	3.0979	5.46137	9.00741	5.59596
1001	control	European American	7.40783	6.74904	8.51548	9.67722	6.54484	11.313	11.2651	6.50434	8.84238	5.79339	11.8453	5.59817	10.0838	8.87926	9.10747	4.97057	3.36654	8.88586	7.52832	11.2829	8.64787	5.45693	10.2196	7.72244	9.97759	12.5431	4.40761	7.22328	7.07046	9.09765	7.52981	6.91241	8.65686	9.99931	6.16682	12.5083	7.04154	4.16304	6.74244	11.4686	5.61131	7.76327	11.3159	3.99201	5.80335	9.0185	4.98359
1002	control	African	11.6994	6.33527	8.99376	10.0723	7.33461	12.4457	11.0046	6.35838	8.83571	5.18421	11.6675	5.20119	10.2356	8.23289	8.58172	7.31023	3.75823	8.95482	7.81511	12.1178	9.93891	7.85455	12.2015	7.04648	9.31843	12.5168	3.64563	6.58556	9.04696	10.0707	7.54703	9.96119	8.65792	10.4917	7.17442	13.3905	7.21752	4.8848	7.63429	10.0882	5.97693	8.85654	12.7299	3.56787	5.80883	9.28541	4.091
1003	control	African	7.54238	6.39767	9.64417	9.62472	6.90177	11.7967	11.3371	6.76176	9.11201	3.70513	11.5273	5.5453	9.5484	8.33695	7.743	5.5607	4.1566	9.20345	7.99165	12.0574	9.77541	7.22898	12.6856	6.67783	9.81048	12.7352	3.87137	6.62317	7.97256	9.26267	7.75101	6.46002	9.25918	9.09221	6.28461	10.2573	7.83616	5.48165	6.93015	10.4917	6.08865	7.89793	12.0953	3.63278	5.84885	9.30807	4.54178
1004	control	African	8.94755	6.49528	8.56783	10.4381	7.31216	12.1176	11.5477	7.08925	9.06316	5.23614	11.4766	5.83161	12.0597	8.62016	8.81326	5.07195	3.64955	9.20027	7.77191	12.4139	9.78678	6.89863	12.8111	7.34797	9.90518	12.6159	3.295	6.98555	9.69045	10.857	7.87653	5.93361	9.13849	9.32445	6.64447	12.7824	7.52977	5.03805	7.12854	11.2007	6.20315	9.85911	11.89	3.76089	5.74321	9.11795	4.51615
1005	control	African American	9.16749	6.80938	8.47896	9.46678	6.63501	11.8015	10.6836	5.84666	8.73906	4.57344	12.0752	5.59338	11.09	9.59059	8.12301	5.68367	3.92753	9.30625	8.02812	11.9991	10.8427	6.182	11.6675	7.05396	9.41778	12.3572	4.24181	6.3987	9.99788	9.74028	7.41314	6.14838	9.07782	9.46471	7.5484	13.0232	6.93264	4.56977	6.80318	10.6499	5.80792	8.08788	12.5688	3.85729	5.58915	9.08897	5.0407
1006	control	African American	6.93659	6.47655	8.71226	7.54099	6.65137	8.21838	10.8233	6.3612	8.92557	4.29167	11.206	5.17096	11.1533	8.6351	8.64061	5.0608	3.64548	8.88644	7.53146	11.402	9.4609	4.93681	11.9937	4.93348	9.49803	12.4573	3.455	6.77084	8.52188	8.72569	7.55735	5.41203	8.26058	8.64454	6.03521	12.7856	6.88429	4.79277	7.07142	10.6378	5.1535	6.36741	12.278	3.6074	5.57394	9.00614	4.42081
1008	control	African	13.1416	6.23392	8.59438	9.87477	7.79234	11.8024	11.5236	7.11713	8.44262	4.58204	11.5967	6.56611	8.84603	8.42921	8.24889	5.58264	4.1271	8.46613	7.78981	11.8694	9.64693	10.1031	12.2461	7.02672	9.68466	12.5498	3.3879	7.37198	8.90304	10.8741	7.51084	5.45169	8.9312	9.54223	6.80795	12.4893	6.51302	4.66526	7.44276	10.9194	5.89286	9.69499	11.987	2.89502	5.42174	8.95265	3.87382
1009	control	African	7.20493	7.49149	8.64425	9.04031	7.17492	11.0647	11.2062	7.05445	9.01431	5.03089	11.2895	6.06596	10.1038	8.99407	9.75631	5.58879	4.71328	9.01834	7.57741	11.6649	9.84886	8.55573	12.1567	6.20758	9.78723	12.3394	3.95736	6.69273	8.48963	9.87703	7.35669	5.55453	8.73841	9.49136	7.11238	12.9764	6.88156	5.25765	6.849	10.8392	5.8416	8.44537	12.3816	3.17699	5.66992	8.69641	4.70085
1010	case	African	14.7488	6.82601	9.21756	6.48053	6.71398	11.9668	10.7154	5.32491	9.10392	10.8629	11.5546	5.29214	8.00219	8.29037	8.7746	5.23645	4.98614	9.25336	7.80829	11.7028	9.22833	6.76312	12.173	8.2228	9.66216	12.5001	2.75235	6.59655	7.70118	12.4688	7.7138	5.74691	9.82598	9.68938	6.15531	11.4422	7.35378	5.03056	6.68041	10.8046	5.43978	14.0947	12.6255	3.94093	5.95699	9.38308	4.95177
1011	control	European American	7.57628	5.76749	9.16816	8.44541	6.00143	10.012	11.4563	7.49542	8.81365	4.80587	12.5051	4.54152	10.1174	8.93031	7.80033	5.40989	3.47602	8.42907	8.26216	11.7578	9.84736	5.17111	10.9387	6.75354	10.0913	12.6905	3.02843	6.18981	8.89833	8.79825	7.33936	5.91895	8.38405	10.0564	5.62605	13.479	6.58238	4.10171	6.55201	11.8613	5.39173	7.07191	12.0574	3.74291	5.64299	9.00577	4.21993
1012	case	African American	7.11673	9.67477	9.00563	8.57106	6.91992	10.4055	11.3233	7.3327	9.53534	3.33028	11.8348	8.11156	10.9417	8.8923	12.3306	4.96729	4.73927	9.51488	7.87436	12.4681	11.5926	8.36984	11.9794	6.27125	9.8293	12.554	7.81579	7.54822	9.20262	9.82276	7.71493	6.30901	10.2885	9.0974	7.1673	13.5749	7.49047	6.39609	7.35606	11.349	7.31168	8.04984	12.3585	4.88783	6.36813	9.35334	7.77693
1016	control	European American	8.36923	6.43147	8.7072	9.78207	6.7564	11.5365	11.2585	6.7301	9.17781	4.55526	12.4546	5.13414	10.2487	8.46327	8.25678	4.77774	3.50754	8.72981	7.88194	11.8711	9.91792	5.57594	10.114	6.90091	10.062	12.6721	3.83187	6.80592	9.27497	9.38845	7.79095	5.47359	8.77882	9.50606	6.33396	12.8088	6.91408	5.03635	6.94179	11.3633	5.51139	8.00257	12.1715	3.61588	6.25223	8.88257	4.43597
1017	control	African	11.4798	6.24416	8.62175	9.28563	6.59964	11.7195	10.5469	4.85739	8.74301	3.809	11.6881	6.74677	10.1418	8.6794	8.41847	5.30771	3.75616	8.50076	7.73906	11.7967	9.4558	8.69917	11.8259	5.91025	9.58875	12.3378	3.283	7.13358	9.13172	10.7056	7.43264	5.7177	8.57265	8.88484	6.82809	12.1852	6.70129	4.42031	6.58241	10.3137	5.0833	8.68029	12.089	3.26206	5.74991	8.97228	4.22876
1018	control	African American	13.7676	6.2174	8.60262	9.76667	6.93276	12.8659	11.5925	6.14128	8.65746	4.76238	12.8915	4.58492	10.3017	8.58776	6.8112	4.90641	3.58497	8.64239	8.02357	12.5721	9.46142	5.95005	12.19	7.55371	9.85454	12.6543	3.29957	6.78399	10.1502	9.55507	7.61702	5.50025	8.36641	9.33567	6.58467	12.2288	6.90745	4.6766	6.5406	10.3885	5.50578	9.45563	12.2372	3.88905	5.54087	8.82339	4.57106
1019	control	African American	11.2952	6.44327	8.32367	10.1056	6.41965	12.124	10.9738	6.76811	9.03089	11.6246	12.7537	4.83716	10.5901	8.62668	8.8248	5.21714	3.42216	9.40045	7.3842	12.2298	10.1224	7.59219	11.6034	7.40217	9.46224	12.4764	3.60077	6.8047	8.40623	11.0291	7.61929	5.71908	9.15152	10.0996	6.57795	12.9541	6.86825	5.24571	6.92438	11.3227	5.2146	10.3198	12.485	3.53136	5.63724	8.62538	4.83835
1020	case	European American	8.60978	7.88503	8.67633	9.87736	7.13285	11.6682	11.1058	6.81322	9.64927	5.04973	12.3679	7.29051	10.1186	9.14078	8.75301	4.84444	3.23214	9.57849	7.65382	12.1575	10.4378	6.18512	10.3005	7.11432	9.97586	12.3235	4.89198	7.14121	9.17242	9.48435	7.84431	6.2642	9.15269	9.95625	6.91179	12.5305	7.22793	5.02765	7.26571	12.0758	5.43277	7.79852	12.4867	4.3732	5.84744	8.99259	5.19554
1021	control	African	10.8578	6.61166	9.1185	8.54436	6.90268	12.3599	11.5694	7.11329	9.14751	4.91601	11.1754	6.33978	11.1058	8.6834	8.96985	5.20135	3.7285	8.87969	7.66845	12.3759	9.74981	6.65202	12.0132	6.65003	10.4618	12.6049	3.71407	6.44947	9.58582	10.506	7.58779	6.03739	9.41965	9.3227	6.25603	12.0193	7.37501	4.99918	7.15514	11.1346	5.82888	9.78776	11.9312	3.33797	5.83384	9.27952	4.7412
1022	control	European American	12.2038	6.60597	8.94402	10.2511	7.25474	12.3827	11.2991	6.31122	9.24394	4.13116	12.2715	5.47282	10.0178	9.18183	7.82868	5.42037	3.92133	8.93354	7.71632	12.6387	10.1639	5.27577	11.0379	7.77639	10.3913	12.6165	3.69031	7.10338	8.75762	9.90818	7.74645	5.73981	8.69409	9.59378	6.48926	12.9898	7.0327	4.94889	6.95327	11.4852	5.38562	9.57593	12.0209	4.13339	5.78943	9.36439	5.22819
1023	case	African	14.8531	6.96389	8.59385	8.69444	7.38304	12.4524	10.9525	6.24319	9.1109	8.12738	13.0316	5.78763	11.4445	8.69973	9.26024	6.34008	4.33565	9.3113	7.54042	12.5688	9.99469	10.8941	11.9802	8.75679	10.0237	12.5078	4.02478	7.12207	9.58213	12.1327	7.64916	5.12134	9.01431	10.0794	7.14933	12.5372	6.66282	5.73376	6.91047	11.1187	5.98741	12.2352	12.6897	3.46065	5.71432	9.09223	4.64411
1025	control	African	9.67823	6.6306	8.5466	9.55415	7.13092	12.2178	11.1733	5.97752	8.59951	4.13348	10.6625	6.03663	10.5391	9.05718	10.1366	5.223	4.27212	9.19923	7.85124	12.245	9.38018	8.11545	12.3787	6.67313	9.61891	12.5801	4.03291	6.40124	9.18994	10.6314	7.64622	5.52889	9.90797	9.18072	6.98801	12.4296	6.92399	4.74168	6.52974	10.6262	6.21569	9.49509	11.9104	3.42527	5.44546	8.72987	4.24258
1026	case	European American	7.56939	6.90379	8.51883	8.95497	7.25485	10.3727	11.2276	6.28426	8.9085	3.45015	11.8758	5.44016	10.9855	8.47117	9.10636	5.21499	3.67658	9.12462	7.76681	11.7399	9.50181	6.12882	10.4398	5.93625	10.0711	12.4065	5.63141	7.26474	8.15133	8.12801	7.26864	5.18352	9.17514	8.89945	6.13167	12.309	6.75079	3.99417	6.59399	11.4832	4.80038	6.95109	11.5734	4.21501	5.38628	9.36766	4.87804
1027	control	African	11.8695	6.65165	8.99937	9.40366	7.27133	12.3408	11.1246	5.84389	8.75672	5.29726	11.3508	6.03169	10.7843	8.51128	10.9839	6.14049	3.96161	9.09943	7.79234	12.4397	10.1936	8.6631	12.0643	7.18618	9.68854	12.6049	3.48525	7.34406	8.56063	12.0258	7.85559	6.19109	9.31917	9.32606	7.08013	13.2834	7.29076	4.99925	7.08696	10.5544	6.18294	10.211	12.1256	3.32214	5.71135	8.8967	4.46216
1028	case	African	7.54474	6.52245	9.17188	4.50467	6.91346	10.4008	10.4737	6.84626	9.12935	3.25632	11.6486	5.69272	10.6706	8.31461	9.02971	5.45889	3.69217	8.96487	7.76507	12.0046	9.13299	5.31218	11.6534	6.66395	10.0178	12.5859	3.84901	5.81383	8.6097	7.90862	6.97394	5.64304	9.16316	9.41675	6.33443	12.1913	7.63773	5.27782	6.94793	10.9867	5.22457	7.09567	12.4164	3.51638	5.80042	9.03588	4.6172
1029	control	European American	6.32716	6.32379	8.40911	8.30661	6.76082	9.8229	10.8571	6.5517	8.80298	3.25578	11.773	4.9608	9.34504	8.82719	6.81017	4.99523	3.4413	8.21181	7.98426	11.3898	10.6615	4.50216	10.3499	5.51758	10.0063	12.6056	3.82788	7.01204	7.44074	8.17885	7.33596	5.33123	8.51585	8.69023	6.02704	12.8614	7.02557	4.78203	6.63414	11.5101	5.38908	6.56538	11.7026	3.93258	5.58615	9.20576	4.80872
1030	control	African American	14.2743	6.24169	8.99683	9.75703	6.77087	12.2894	11.6367	6.8064	8.6856	3.74699	12.5558	5.02121	10.1901	8.89607	7.19688	5.04387	3.34397	8.27586	8.03909	12.365	9.28236	4.97901	11.316	7.69929	9.91609	12.6635	3.72307	6.86188	9.82862	9.89085	7.49541	6.067	8.42922	9.43321	6.21198	12.8871	7.02935	4.67881	6.43114	10.5804	5.7134	8.94835	11.7131	2.9984	5.32123	8.97034	4.30633
1031	control	European American	12.9365	6.36699	8.34098	9.67475	6.54609	11.801	11.0914	5.63577	8.53521	3.71868	12.485	3.84617	10.5204	8.21949	7.76377	5.54043	7.52243	10.6376	7.36498	11.7636	10.9358	10.0953	11.8903	8.5999	9.97466	12.5615	3.23737	6.4424	8.87206	9.85572	7.26663	4.9777	8.34226	10.4087	6.62497	12.466	6.35134	3.79126	6.40805	11.1751	5.43548	9.81405	12.0025	3.97528	5.03829	8.76119	4.9343
1032	case	African	14.7307	7.93318	8.967	9.58482	6.79736	11.9133	10.8184	5.33497	9.94037	10.1476	12.3463	5.80046	10.3599	8.29935	10.7574	5.12868	4.76206	9.90268	7.42226	12.6893	10.3514	9.04329	12.0747	8.50478	9.52381	12.4998	3.96226	6.76486	9.13577	13.6638	7.99589	6.41412	10.0563	10.6034	7.28317	12.5052	7.45695	5.11926	8.83792	12.3578	5.7566	14.3736	12.7564	4.36885	5.65995	8.94832	4.86086
1033	control	African American	11.2726	6.0482	8.51503	9.81266	6.99264	12.0925	11.614	6.29494	9.3255	4.17872	11.4245	5.56842	10.255	8.63765	8.25528	6.14551	4.92157	8.89284	8.00455	11.7259	9.57	5.84791	11.8902	7.8276	9.56764	12.6588	3.22579	6.09091	9.33165	9.06028	7.50071	6.15164	9.16617	9.55074	6.40076	12.7363	7.48281	4.41584	6.95324	11.8341	5.7854	8.6554	12.4071	3.70995	5.68886	9.35376	4.87736
1034	control	African	10.3257	6.40608	9.1618	10.2956	6.80825	12.6784	11.6038	6.62182	8.84801	4.62695	10.9782	5.80948	10.437	8.49629	7.81805	5.2493	3.88315	8.85817	8.00255	11.9404	10.9556	6.79169	12.2392	7.11454	9.84509	12.6908	3.48483	6.30541	9.47465	9.44177	7.67107	6.01505	8.68357	9.62774	6.43393	13.1647	7.15881	4.65371	6.95327	11.0583	5.61435	8.45693	12.4145	3.03266	5.74977	9.02906	4.36167
1035	case	African American	6.56749	5.90813	8.2681	6.71248	6.64907	9.22135	10.6481	6.27052	8.47351	3.50978	11.7704	4.87558	9.95981	8.55313	8.32004	4.64232	3.5886	8.64608	8.00485	11.498	9.24861	6.11611	10.2838	5.15509	9.55708	12.5168	4.08365	6.8678	8.22422	8.60784	7.3597	5.74599	8.85239	8.9588	6.42427	12.3033	6.97314	5.37043	6.63732	10.9464	5.75504	7.31174	12.1786	3.0598	5.51073	8.91059	4.30244
1036	control	European American	6.5304	6.25294	9.05173	9.79681	6.68474	11.6063	11.5093	6.55504	9.41965	3.91865	12.8195	4.97367	10.8384	8.82731	7.29609	5.23624	3.47558	8.75779	7.79837	11.864	9.28522	5.3012	10.3908	6.14205	10.3652	12.5949	3.38138	6.20428	8.28962	9.27609	7.60928	5.96001	8.96536	9.27954	6.26005	12.6056	7.40956	4.44771	7.09671	11.4972	5.1826	7.17263	12.0122	3.6022	5.84921	9.26786	4.83668
1037	case	African	14.5355	6.77004	9.30456	6.05799	7.25069	12.4034	10.7902	5.8481	8.92615	13.9224	13.4916	6.34464	10.5405	7.55505	9.39401	4.49325	4.44795	9.2344	7.65809	12.3188	9.56584	9.42321	12.8162	8.81506	9.63707	12.5733	4.0456	6.40834	9.19218	13.9167	7.63016	5.80193	9.21598	10.1509	6.85723	11.3133	6.89943	5.61736	6.45069	11.4926	6.00273	14.3654	12.1509	3.46438	5.685	9.12094	3.97079
1038	control	African	12.8081	6.19615	9.6447	9.5527	6.70369	12.8017	11.3017	5.56064	8.61958	5.22125	10.3161	5.73489	10.1373	7.85674	8.04438	3.74969	4.48533	8.58838	7.86586	11.9781	9.07495	9.27796	11.3817	7.19002	9.73398	12.5059	3.26573	5.75365	9.82885	9.29208	7.71447	6.1415	8.8337	9.70564	6.99938	9.10719	6.7885	4.95183	5.98484	10.7772	5.9055	8.24914	11.6257	2.73462	5.61909	8.61694	4.08399
1039	case	European American	7.4722	6.41449	8.76742	8.35186	6.62297	9.28771	11.4508	7.46302	8.84224	3.18312	12.4573	5.0828	10.4581	8.65958	8.58968	5.43169	3.26844	8.36259	7.95766	11.8641	9.6448	4.22651	10.3612	6.14947	10.27	12.5631	3.27212	7.31065	8.2777	9.12683	7.62457	5.5133	8.53524	9.25164	5.78711	12.926	6.99744	4.68419	6.97818	11.3012	5.54557	7.08099	11.7078	3.40515	5.64688	9.11514	4.82456
1041	control	African American	9.38141	6.46875	8.89917	9.81198	6.45812	11.7217	11.1469	5.50021	8.90688	3.76381	10.845	5.47814	8.29949	8.75667	7.69795	5.35336	3.10998	8.96014	7.87994	12.1127	9.07109	6.19848	11.7353	6.8676	9.78523	12.6022	3.99118	6.34014	8.81397	8.57054	7.81379	5.64937	8.98154	9.35496	6.99767	13.0349	7.292	4.54631	6.59108	11.0083	5.61552	8.13743	12.4552	3.74908	5.6322	9.0185	4.96346
1042	case	European American	8.93161	6.86339	8.72138	9.48404	6.69589	11.1966	11.131	6.77105	9.35833	4.85539	12.2352	4.83177	9.87634	8.33655	8.34257	5.06213	3.88076	9.00982	7.92295	11.7865	10.7116	5.32546	11.0528	7.56881	9.17686	12.6084	3.92689	6.55653	8.28748	9.43132	7.63092	5.95424	8.57655	10.0595	6.03644	13.3862	7.14811	3.98394	7.44222	11.7734	5.32238	7.84589	11.9038	4.75413	5.723	9.42423	5.49181
1044	control	African American	7.81329	10.0455	8.58676	9.48622	7.02304	11.3878	11.0033	6.88379	12.0712	4.28793	12.0967	5.54311	9.8981	8.8292	11.1261	7.88169	3.96996	10.0222	7.45472	14.7196	9.67758	6.01592	11.8463	6.71463	10.0877	12.4136	4.96468	7.03423	9.11591	9.84644	8.09498	9.00774	10.9855	10.3358	6.46653	12.2291	8.68159	5.64696	9.34245	12.8901	7.62689	8.72301	12.6318	6.67694	7.06619	10.0003	7.95939
1045	control	African	6.73879	6.09214	8.54556	9.30397	7.4215	11.6364	10.4722	6.26524	8.60602	5.82558	11.0699	5.32289	10.8601	7.72475	8.14098	5.56631	4.25335	8.82449	7.28549	13.2213	9.71855	12.1317	12.0076	5.32382	8.84146	12.3043	3.22638	5.52664	9.10413	8.14595	7.62154	5.57873	8.44205	8.05379	7.1472	11.9501	6.85818	4.13573	5.85598	10.364	5.28882	6.45597	11.7954	2.64978	4.78747	7.89139	3.69268
1046	case	African American	6.98044	5.40514	8.62013	9.78657	5.8119	11.7855	11.1161	5.69156	8.36676	3.0123	11.3542	4.1695	10.2032	8.2204	7.11121	5.02466	2.89103	8.28357	7.88684	11.268	8.68651	5.06656	11.0015	5.87276	9.50641	12.4524	2.71879	5.92488	8.29934	8.94602	7.02969	4.95346	7.60669	8.78252	5.82325	12.8997	6.83542	4.30903	6.2063	10.2844	4.74181	12.739	11.776	2.96506	5.29636	8.54488	3.82038
1047	case	African	14.1138	6.51876	10.134	5.41557	7.3905	12.6383	10.4442	5.59453	8.64354	12.6935	14.0984	4.34484	9.01366	5.87909	9.09503	4.51305	2.76223	8.66101	7.7055	11.6862	9.76902	8.7434	13.1496	7.69239	6.96997	12.1935	3.75551	5.48008	8.43088	12.3912	6.74839	7.50817	9.73575	9.63653	5.81247	9.25925	6.15772	5.30684	5.83665	10.5914	5.58593	13.5729	12.0383	2.64103	5.32446	8.5423	3.98454
1048	control	African American	6.54408	5.8172	8.565	8.55562	6.20896	9.97621	11.2962	7.24705	8.55893	3.88637	11.357	4.9306	10.6512	9.35086	7.17103	4.58114	3.51177	8.18488	7.84806	11.2861	8.36236	5.48341	11.57	5.31144	9.95184	12.4192	3.24505	6.46779	9.57702	8.72171	7.30326	5.18022	8.71257	8.85965	5.83655	12.6725	6.98169	4.4224	6.07837	10.142	5.2708	5.98726	11.4863	3.38761	5.27279	8.81239	4.37629
1049	control	African American	7.74674	7.5037	9.00353	8.87223	6.76007	11.1583	11.0277	6.22805	10.167	4.12301	12.8593	5.53688	9.59987	8.71841	8.52707	5.82279	3.26133	9.28179	7.6488	12.6178	8.84894	5.01414	12.2655	6.38758	9.70711	12.4221	3.74905	7.24727	8.95822	11.6069	7.76157	6.08974	9.59941	9.08989	6.19705	12.6606	8.57122	4.64508	7.70739	11.3186	5.93819	14.146	12.7306	4.82347	6.21561	9.57732	5.48921
1050	case	African	8.18336	7.91499	9.76784	5.63207	6.68308	11.991	11.3481	7.0644	10.0744	5.03532	11.461	6.3019	10.2269	7.87894	9.74749	5.89831	3.40947	9.47585	7.8669	12.3404	8.77831	6.76737	12.6906	7.64529	9.34993	12.7059	4.10944	5.65295	9.80174	8.58834	6.85409	5.86443	9.46351	10.0792	6.10717	9.94815	7.07716	5.48319	6.96316	11.4662	5.76012	9.53554	12.4961	4.09672	5.8204	9.05443	4.68995
1052	control	European American	6.67033	6.4657	8.49035	9.26176	6.38457	11.2391	11.187	6.53856	8.91777	4.05175	11.9896	5.60127	9.59307	8.5993	8.5127	5.48884	3.02127	9.06588	7.63087	11.4342	9.71608	5.80539	9.84888	5.97053	10.0635	12.4863	3.68408	6.43237	8.85137	9.26141	7.38041	5.50096	8.51634	8.81826	5.9869	12.6027	6.83124	4.78059	6.81864	10.8923	5.35742	7.23687	12.1575	3.55962	5.52799	9.11408	4.53818
1053	case	European American	13.9365	6.51093	8.48452	9.62308	6.66117	12.2941	11.182	6.11871	9.09941	3.37297	12.5986	5.10047	10.728	8.63445	8.24402	5.44172	3.70181	8.32874	7.62956	12.5783	10.5552	5.39743	9.82274	7.87361	10.4743	12.6358	3.56414	6.72113	9.21573	8.65943	7.73637	5.48774	8.52554	10.2854	5.85793	13.2552	7.4418	4.36427	6.37959	10.7004	5.23109	7.56951	12.1346	3.96182	6.21066	9.31856	4.94372
1054	case	African	9.4573	6.52698	10.866	4.57437	6.85423	12.0685	10.582	6.44135	7.70388	3.93565	10.7027	4.86321	10.1507	6.69053	8.98872	3.76636	3.13723	8.38494	7.67186	11.7978	9.17266	4.61931	11.8586	6.72795	8.18292	12.3683	3.74305	6.13151	8.87031	8.37156	5.2115	6.62744	8.51331	9.44637	5.04247	9.37237	7.06578	4.19821	5.91746	9.86084	5.52246	7.4136	11.895	3.55375	5.2654	8.73348	4.45855
1055	case	European American	10.3767	6.77585	8.22241	10.0959	6.42157	11.6259	10.7342	6.6497	8.95446	4.04726	12.3842	4.79469	10.3884	9.12831	7.3744	4.97708	3.8506	9.22396	7.60039	11.8794	9.82938	5.90911	10.9814	7.54975	9.66231	12.5388	3.4566	5.37419	7.67848	9.0726	7.39844	5.9332	9.11429	9.47218	5.99329	12.7885	6.60972	4.31547	6.66719	10.8298	5.43531	8.32439	12.3721	3.83643	5.20983	9.1791	4.66041
1057	case	European American	10.2009	6.28891	8.62489	10.0476	6.80279	12.3477	11.136	6.98376	8.98216	4.1015	13.1411	5.29955	10.9709	8.60942	7.62077	4.99255	3.65679	8.68758	7.615	12.2434	9.50646	5.74393	11.5212	8.03274	9.93711	12.5594	3.55901	7.18841	8.48358	9.64698	7.43919	5.56572	8.637	9.65672	6.1089	12.9279	7.37645	4.34475	6.64313	10.9845	5.51775	8.55539	12.0997	3.6525	5.43454	9.33219	4.64717
1058	control	African	11.3251	6.62745	8.78752	9.98148	7.42805	12.3893	11.3245	5.99747	8.89453	4.47519	11.2795	6.20515	10.3421	8.7889	8.23904	4.87273	4.3607	9.05387	7.91731	12.4164	11.16	5.82728	12.503	7.49728	10.0338	12.6341	4.2179	6.82427	9.66391	9.53744	8.05379	5.80961	8.80222	8.95481	6.30942	13.1675	7.49605	4.92961	6.92651	10.9271	6.19592	7.59318	12.3035	3.54493	5.88254	9.28014	5.16092
1059	control	European American	11.0172	7.68429	8.76315	8.98668	6.49945	11.7227	10.9148	6.47027	9.04509	3.94419	12.2217	5.12854	9.19243	8.1771	8.6597	5.40592	3.81542	9.14401	7.83733	12.1815	9.58198	5.31496	10.3545	7.61911	10.0577	12.5079	4.06907	7.14803	8.92384	8.63942	7.76356	5.63888	8.67771	9.64093	6.39279	12.9324	6.95159	4.74798	7.1499	11.6565	6.44029	6.94973	12.1774	4.28628	6.1031	9.35238	4.82795
1060	control	African	8.39307	6.72122	9.42689	9.66571	6.78776	12.2108	11.4721	6.85047	9.14533	3.81551	10.5261	6.44267	10.0277	7.73084	9.17972	6.11506	4.0823	8.68971	7.25354	12.0637	9.37676	7.40123	12.152	7.46617	9.43107	12.6621	3.95296	6.45122	8.23352	9.05643	7.70981	6.42578	9.74612	9.56651	6.42825	9.02375	7.21653	5.35636	7.00616	10.4022	6.2528	8.1665	12.5828	3.66712	5.33513	9.23462	4.78413
1061	control	African	8.05389	6.63942	8.77281	9.05575	6.80124	10.9055	11.0097	6.96833	8.62952	2.88002	10.9446	5.17528	11.1534	8.74979	8.16708	5.24751	3.29314	8.94218	7.64305	11.2244	9.43405	6.64379	12.2157	5.79701	10.0445	12.6125	3.74671	6.56161	9.59917	8.87046	7.2073	5.56365	9.25372	9.02614	5.99861	11.6532	7.07157	4.84159	6.62612	11.3209	5.46709	6.99036	11.6292	3.13319	5.4615	8.83556	4.08395
1062	case	European American	7.14546	6.42574	8.56113	9.43114	6.52138	11.0124	10.9554	6.75151	8.81704	3.521	12.4444	5.29521	11.5763	8.66172	7.30585	4.56943	3.80147	8.61184	7.64802	11.6815	9.49791	4.64021	10.529	6.14417	9.86997	12.5539	3.98791	6.9959	9.14055	8.80005	7.28835	5.50275	8.40369	9.12685	5.78425	12.8812	6.93843	4.44422	6.58463	10.8765	5.29741	6.82899	11.516	3.08932	5.31342	8.92192	4.51579
1063	control	African	10.7693	6.50801	8.40974	9.36857	7.12162	11.8788	10.9475	5.97985	8.7003	4.6028	10.9586	6.14933	10.2786	8.54174	8.96374	6.72863	3.7533	8.21014	7.5274	11.8062	9.316	7.58002	12.33	6.92613	9.8599	12.6437	3.62153	6.59824	9.56822	10.0559	7.29096	5.75236	9.06918	8.97333	6.6952	11.9906	6.651	4.53845	6.63294	11.0064	6.33655	8.37635	12.0706	3.64626	5.52207	8.75189	4.58917
1064	case	European American	8.52373	5.98558	8.35707	9.77799	6.9088	11.6387	11.1676	6.33601	8.78759	3.35449	12.2718	6.58566	10.5216	8.5592	7.40509	5.09592	3.14236	8.22866	7.75517	11.3193	9.80322	5.8825	10.4881	6.68946	9.70668	12.543	3.33875	6.60496	8.74114	8.94457	7.28043	5.48454	8.1981	9.04828	6.13544	12.7077	6.35798	4.10292	6.85415	10.917	5.2224	8.06393	11.7497	3.30846	5.64656	8.96941	4.43906
1065	control	African American	9.44355	7.86044	8.95898	10.7542	7.20781	12.5902	11.5666	7.35729	10.4143	4.80011	12.4337	5.42989	10.5843	9.22537	8.08929	5.65461	4.39423	9.95603	8.17235	13.1144	10.1349	5.48554	12.6877	8.4846	10.4704	12.7614	4.11851	6.23054	9.3398	9.4737	8.24466	7.16158	9.94029	10.3081	6.31246	12.822	8.02814	5.39761	8.08315	11.8106	6.78116	8.15056	12.9403	5.23541	6.18397	9.97215	5.94008
1066	case	African American	7.29628	6.39471	8.53229	9.65195	7.02633	11.1717	11.1724	6.30538	9.17784	3.20508	11.5608	6.65734	10.9961	8.94362	7.71284	5.11358	4.09864	8.48721	8.05607	11.6004	9.37584	6.67928	12.3887	6.1138	10.013	12.5541	3.30148	6.57233	9.21185	9.32957	7.00751	5.48849	8.78715	9.26737	6.76892	11.7556	7.02424	4.89241	6.38167	10.9081	6.08903	7.82091	12.4054	3.48106	5.38737	9.15475	4.53728
1067	case	African	15.3166	6.98352	9.11639	7.62763	7.4491	12.5546	11.2503	5.41709	9.01081	13.3215	13.5208	6.61262	10.8214	8.82611	9.32683	5.73841	4.15212	9.597	7.73354	12.6239	10.6783	9.06012	13.006	8.43209	9.68083	12.6815	3.6785	6.50478	10.7502	14.0671	7.8242	5.43423	8.78611	9.58923	7.08023	12.6971	7.4408	5.7674	6.60678	10.7798	5.66533	14.6012	12.5301	3.80591	5.78807	8.74119	4.51963
1068	control	African American	7.94926	6.69506	9.10709	9.89032	7.01289	11.114	11.2369	6.42506	9.33491	4.27898	11.5875	5.05172	11.0411	8.48243	7.79227	6.13257	3.59348	8.43566	8.0345	12.0242	9.90633	5.08156	12.1556	7.09962	9.16319	12.6603	3.31848	6.05496	9.70331	11.4914	7.6603	6.25511	9.1694	9.45577	6.00483	13.244	7.75435	4.71919	7.18265	10.7127	5.48131	10.2573	12.7754	3.97478	5.54442	9.46163	5.14499
1069	case	European American	8.17359	6.76447	8.85525	9.60617	6.36418	10.9076	11.4631	7.14978	9.02026	3.97181	12.6136	4.98517	9.6322	8.8258	8.99901	5.50361	3.61868	8.9701	7.85232	11.469	10.4703	5.29642	10.728	6.56583	9.84845	12.6804	3.64678	5.44797	8.36794	8.30966	7.67228	5.63886	8.8386	9.54454	6.04669	12.401	6.98891	4.65507	7.04589	11.138	5.72823	6.58711	12.3551	3.22143	5.62543	9.28662	4.50969
1070	control	European American	8.21571	7.90819	8.79868	8.4519	7.08756	10.0563	10.2314	5.4856	9.82148	4.43288	12.406	6.05337	10.5134	7.92848	10.9443	5.75906	4.44003	9.36689	7.29262	12.6955	9.26135	5.01778	10.5082	6.28043	9.94793	12.0454	4.12796	7.41181	8.27742	8.37902	7.81881	6.20629	9.38276	9.78487	6.17233	12.6316	7.36276	4.23299	7.92597	11.5441	5.95767	7.57396	12.0163	4.7265	6.37441	9.45525	5.66123
1071	control	African	7.25922	6.28555	8.4836	8.36715	6.7171	11.161	10.9149	6.45868	8.46547	3.49589	11.1759	5.42667	11.6231	9.35892	10.8091	5.49012	3.83306	8.58351	7.54368	11.7123	9.47084	7.00078	12.4116	6.27441	9.68736	12.4898	3.72786	7.23572	10.3097	9.84405	7.33734	5.75251	8.98133	8.79413	6.54003	12.2797	7.14365	4.99556	6.15242	11.6948	5.85768	8.06578	11.9034	3.6264	5.45467	8.76581	4.04997
1075	case	European American	9.77122	6.18944	8.16066	9.20661	6.60693	12.0307	11.3036	6.53534	8.78728	4.10116	11.8257	5.23861	9.57345	8.43885	8.12576	6.09718	3.39879	9.28515	7.71861	12.0174	10.2217	5.69753	10.7695	7.34963	9.83965	12.5229	3.6201	6.27035	9.21688	9.51592	7.34181	5.60808	8.23632	9.30019	6.14327	12.7149	6.85032	4.00058	6.86535	11.2386	5.7562	8.57358	12.229	3.78221	5.61407	8.62375	4.7683
1076	control	African American	7.80147	5.83396	8.15616	8.10797	6.06792	9.47782	10.8244	6.36072	8.46969	3.63321	13.2005	5.00951	10.994	9.0103	7.86894	5.57525	3.05769	8.60012	7.5453	11.3027	9.54129	5.65511	11.4175	5.45694	9.45803	12.5853	3.30898	5.68136	7.85158	7.83221	7.33685	5.33184	9.12377	8.94631	6.2452	12.3104	6.75337	5.37796	6.36908	11.0337	5.11626	6.1099	11.944	2.42607	5.48357	8.85314	4.06104
1077	control	African American	15.2674	6.07653	8.73862	9.9798	6.93064	12.6679	11.3974	6.30686	8.77963	5.03536	11.4347	5.17104	10.6911	8.71544	7.58245	4.63476	3.71656	9.04142	8.07358	12.6705	9.95141	6.64748	12.1612	8.74571	9.79032	12.7891	3.46034	6.72177	9.25319	10.5587	7.13584	5.34287	8.75691	10.0412	6.40666	12.7698	6.64397	4.6985	6.85836	10.5892	5.66347	10.6578	12.2583	3.75847	5.7005	9.00768	4.62703
1078	case	European American	8.17642	6.17702	8.38425	9.2059	6.55383	10.4297	11.3235	6.70769	8.95949	3.58387	12.4549	6.4827	10.0697	8.50871	8.3589	5.99153	3.35616	8.94969	7.75343	11.3326	9.55402	5.74868	10.8332	6.8325	9.89005	12.5516	3.4058	6.19906	8.39023	9.05666	7.54598	5.22062	8.39473	9.75434	6.54453	11.9239	6.92309	3.92704	6.72823	11.8289	5.51595	6.71687	11.7557	3.54176	5.35467	8.96693	4.7038
1079	case	African American	10.5397	6.68214	8.62267	9.81981	6.32377	12.3272	11.0105	5.94177	9.12139	6.72221	12.3336	5.54731	9.50422	8.98189	8.28813	5.28823	3.22742	9.22128	7.78107	12.1902	10.401	5.96761	11.7222	8.67334	9.46434	12.6206	4.30111	5.99702	9.58695	9.65822	7.59561	5.75388	8.82588	10.1582	6.52065	12.8461	7.2764	5.22824	6.93681	11.2321	5.67026	9.44429	12.578	3.77097	5.74247	9.30204	4.83709
1080	case	African American	6.48388	6.44937	8.09152	9.77595	6.12736	11.3195	11.3383	6.06576	8.07819	4.83986	10.3545	4.7125	8.81582	8.34389	10.3998	3.57025	3.09589	8.9081	7.33519	11.3091	9.91973	5.28608	12.3617	6.7105	8.65935	12.6339	3.41509	6.40228	8.61841	8.39701	6.94752	5.03694	8.12533	9.16921	5.55888	10.8671	6.64329	4.45876	5.76996	10.6579	4.94237	6.35331	12.5297	3.09681	4.71622	8.36114	4.40814
1081	case	African	8.93583	8.50321	9.90429	7.22739	6.76897	10.8757	11.3754	7.14492	10.5294	5.0124	11.051	6.82849	9.77554	8.47675	12.3002	7.85349	5.06798	9.29643	7.77505	12.3531	10.0242	7.5846	13.0991	7.13891	10.0409	12.5012	4.15248	6.97345	9.21733	9.23243	7.60931	6.47093	9.58532	10.2902	7.02453	10.7231	8.67814	6.36713	6.83546	10.9684	6.05412	7.79071	12.26	4.26776	6.2331	9.70143	4.99779
1082	control	African	9.6062	6.64518	8.53039	8.96614	6.80925	10.951	10.8605	5.91296	9.10206	3.6809	11.0607	6.06373	10.4112	8.77341	9.8592	4.95007	3.26852	9.09487	7.64829	11.5248	9.84535	8.15056	12.34	5.4893	9.76137	12.4866	4.30075	6.81357	9.26728	9.5996	7.55249	6.01411	9.41093	8.2442	6.21811	12.1033	7.05273	4.6248	6.93749	10.7326	6.487	7.98257	12.3328	3.69141	5.14224	9.26456	4.95086
1083	control	European American	15.0546	6.20715	8.26051	10.2684	6.76072	12.4916	11.3455	6.38018	8.71719	5.14522	13.0862	5.38751	9.82312	8.07708	8.34098	4.74615	3.21752	8.86478	7.83397	12.3677	9.50294	6.13275	11.4919	8.57366	10.0215	12.4549	3.37056	6.78858	9.1925	10.5037	7.45182	5.33547	8.35064	10.1366	6.67745	12.1799	6.62232	4.97462	6.76564	11.4062	5.178	9.169	12.1942	3.86349	5.55434	8.85757	4.59721
1084	case	African American	7.68921	5.38316	8.89215	10.3826	6.57882	11.9549	11.3049	6.64691	8.76131	3.55564	11.4421	4.77418	10.5476	8.41201	7.38208	5.01739	3.09868	8.4676	7.6614	11.6758	9.03895	6.03606	12.5966	6.65746	9.96584	12.5711	2.95736	6.97002	9.90334	9.12345	7.4265	5.37602	8.40782	8.822	6.1287	12.7742	7.20641	5.12322	6.74727	11.707	4.95299	6.91139	12.0112	3.41994	5.66904	8.93541	3.76532
1085	case	European American	8.1818	6.82804	8.84892	9.12216	6.44369	10.9127	11.0998	7.97803	9.53587	5.3362	12.3243	6.07229	10.0782	8.66027	10.8833	5.49547	3.67182	8.81448	7.71261	12.1067	9.90408	6.43465	11.6856	6.61755	9.70542	12.5493	3.76106	6.44348	9.31542	8.95482	7.57569	6.06024	8.8501	9.72474	5.93706	12.997	7.17893	5.11512	7.581	11.6271	5.53233	6.99558	12.5465	3.97744	5.94727	9.22181	5.24404
1086	case	European American	6.97408	6.47383	8.53145	8.96918	6.23875	10.7952	10.5494	6.12101	9.25875	4.06758	12.7545	5.00439	10.3534	8.48179	8.26597	4.55148	3.60672	9.13284	7.95886	11.3822	9.88238	6.46941	10.668	6.15571	10.0371	12.2511	3.40082	6.44633	7.64388	9.07583	7.63664	5.78198	7.95675	8.96336	6.14591	13.0768	7.35587	4.54422	7.18786	11.5262	5.13302	7.37076	11.4521	3.91697	5.65687	9.28914	5.05462
1087	control	African	12.6404	7.11741	8.65106	9.9139	7.34614	12.2572	11.0375	5.05854	9.22574	4.75327	10.9535	6.68415	9.18159	8.37225	8.84436	4.54406	4.07521	8.93507	7.87554	12.4256	10.5297	6.08092	11.7627	7.46521	9.86907	12.3443	4.16551	6.32547	8.97014	10.9276	7.81574	6.23509	9.7739	8.91483	6.13863	12.7556	7.8397	4.91889	7.16499	11.5723	6.07405	10.355	12.043	4.03305	6.09899	9.06827	4.82436
1088	control	European American	7.77872	6.67601	8.45314	8.67186	6.68076	11.5972	11.1333	7.2346	9.04905	3.63159	12.0628	5.50697	10.4275	8.4387	8.84529	5.42324	3.34347	9.00156	7.51165	11.7119	9.6812	6.03531	10.7409	7.31621	9.94012	12.6724	3.64598	7.60383	8.28676	9.43639	7.48579	5.66938	8.96522	9.41654	6.5627	13.1605	6.64313	4.39346	6.38398	10.8303	5.69602	7.44627	11.7069	4.28565	5.3345	8.97757	4.35669
1089	case	European American	8.12192	6.99602	9.00528	10.6862	7.44952	11.7301	11.2226	7.60178	9.67401	4.0729	13.0474	6.17301	10.242	8.8157	8.23405	5.58033	3.95393	9.36032	7.97775	12.3962	10.1192	6.32471	10.8777	7.24297	10.0706	12.7093	4.20226	6.80903	9.27357	8.93477	7.89929	5.9661	9.07481	9.6	6.47935	13.2856	7.55176	4.94654	7.1537	12.4883	5.77022	7.04374	12.4777	4.1555	6.03103	9.56307	5.47015
1090	control	European American	8.57772	7.08549	8.53431	9.29186	6.98981	10.5479	10.7145	5.75707	9.75325	4.39837	12.0734	6.30633	10.1646	8.54068	9.054	5.27197	4.08904	9.26854	7.13278	12.2126	10.0404	6.16467	11.2837	7.44851	9.64339	12.2568	3.61046	6.52905	8.1748	9.13896	8.053	6.15852	8.94082	9.81972	6.50229	12.5837	7.11553	4.5715	7.4733	11.3933	5.73457	8.04041	12.4124	4.70962	5.69403	9.36056	5.32514
1091	control	African American	7.51669	6.23474	8.88308	10.1054	6.67142	11.996	11.3863	6.875	9.29707	3.931	11.546	5.27127	10.9996	8.62203	7.3178	4.80752	3.8728	8.77756	8.15893	11.7998	9.60375	5.35131	12.672	6.87627	9.79308	12.6459	4.26347	6.91516	10.0434	9.75231	7.95023	5.93841	8.80914	9.38042	5.97403	12.8092	7.49454	4.66287	7.03676	11.0255	5.65937	14.21	12.4385	3.36674	5.68642	9.26182	4.58475
1092	control	European American	6.59879	5.98943	8.69682	9.58181	6.32631	10.6953	11.6041	6.63278	9.11159	5.07987	12.3598	5.1987	10.4014	8.56521	7.06082	3.52888	3.34759	8.62374	7.86986	11.7405	9.90875	5.02776	11.205	6.85892	9.75345	12.501	3.06956	6.4512	8.29104	8.76734	7.42196	5.31019	8.11965	9.60565	6.15088	12.551	7.50012	4.49369	6.72597	11.4422	5.10421	6.77343	11.5598	3.75351	5.49023	8.98414	4.43769
1094	control	European American	13.1834	6.5156	8.49805	10.0393	6.77278	12.5037	11.6051	6.39932	8.31951	3.49433	12.3751	4.99375	9.83233	8.54462	7.70888	4.84386	3.62218	8.01737	8.02689	12.5902	9.31945	5.67453	10.4422	7.55492	10.031	12.7357	3.30491	6.40264	7.80638	9.3391	7.19307	5.03143	8.06834	9.41327	6.11794	12.0975	6.77289	4.407	5.96974	10.3089	5.41801	8.05927	12.0962	3.19705	5.33216	8.79425	3.98912
1095	case	African	14.5262	6.31538	9.90995	9.02717	7.21275	12.2953	10.4706	6.8613	8.25121	4.64979	9.85626	4.76826	10.6624	5.7279	8.15688	3.74666	5.09025	9.32574	7.48837	12.5926	10.8815	13.6532	11.9917	7.61417	8.5854	12.5516	3.35554	5.65404	9.10224	8.16639	7.76051	5.31497	8.36619	9.22903	9.59642	9.54895	6.22067	4.76487	6.10794	10.0723	6.71289	7.29681	12.0095	3.38316	5.05148	8.04523	3.47651
1096	case	European American	6.63526	5.64872	8.09744	9.42394	5.9868	11.0291	10.9841	6.92009	8.30286	5.04333	11.5302	4.33008	9.07286	8.06853	6.32987	4.74035	2.93846	7.85971	7.42017	11.2114	8.58057	3.71325	10.5321	6.18834	9.2757	12.3421	3.10537	5.77366	8.37568	8.32187	6.58108	4.90684	7.4247	8.65739	4.94197	12.4083	6.45987	4.10461	5.52775	10.4606	4.20768	6.38908	11.63	3.12784	5.01202	8.56379	4.03592
1097	control	African	10.1041	5.90178	8.81844	9.72814	6.64173	12.0343	11.2098	5.76399	8.49905	4.06313	11.1174	5.96269	9.51171	8.07785	8.12155	5.00014	3.41176	8.07404	7.46369	11.8434	9.04359	5.55183	11.983	6.07546	9.31993	12.6005	3.05085	6.19076	8.82791	9.6856	7.34024	5.58174	7.98478	8.57329	5.82789	9.83076	6.90364	4.67421	5.72666	9.67183	4.80752	9.39753	11.8062	2.66656	5.31487	8.78509	3.78259
1098	control	African	12.2659	6.98934	8.81497	9.66385	7.72377	11.1619	11.0695	5.82667	9.33512	5.05389	11.7984	7.06902	9.73372	8.44206	8.60146	6.97381	5.04499	9.6307	7.17286	12.563	10.5453	8.08975	12.4612	6.55897	8.90817	12.4386	3.9835	7.09322	10.1067	9.63554	7.82804	5.86128	9.32177	9.65818	6.8043	13.3945	7.41823	5.05933	7.5337	10.1966	6.32011	8.76918	12.687	3.66086	6.17211	9.46238	4.89726
1099	case	African	12.6015	5.42117	10.2593	6.50509	6.35666	12.6515	10.4681	4.78667	7.92653	4.70693	9.81706	4.1728	8.79381	6.14632	7.82562	4.74249	3.15971	8.54599	7.20197	11.7993	8.61988	6.03461	11.3811	7.57344	6.79878	12.238	2.6566	4.1174	7.81415	9.29621	6.82783	5.933	8.2618	9.34243	5.71431	9.14472	5.75413	3.73547	6.192	9.85372	5.48907	11.4506	11.7887	2.82779	5.2632	7.98969	3.36688
1100	control	African	12.7149	6.20174	8.4397	9.10519	7.68476	12.0593	10.9462	5.57458	8.5544	4.38535	11.1382	6.17702	9.41104	8.49713	7.58644	5.28113	4.2004	8.77092	7.96656	11.8414	9.65898	8.2611	11.8805	6.58295	9.66288	12.4547	4.80457	6.01594	9.29822	10.6971	7.42939	5.47505	8.34915	8.91725	6.80097	12.4134	6.48938	4.43603	6.47365	10.4588	4.95314	9.41923	12.1081	2.73817	5.5064	8.45623	4.12313
1101	case	African	7.77279	5.0514	8.79533	5.79826	5.96193	10.769	10.0686	5.64078	8.24416	4.09507	9.98439	4.39623	7.91465	6.56941	9.64652	5.29833	3.55993	8.72638	7.39597	10.8938	8.31687	6.30234	11.8688	7.73917	8.00565	11.9679	2.78177	5.37219	7.05515	8.07699	7.61785	5.39581	8.37233	9.5362	5.10013	9.26175	6.79801	3.86956	6.71926	10.7375	4.3818	12.2039	12.1156	2.08574	4.87625	8.18837	3.49798
1102	control	African American	6.69649	6.6375	8.24826	9.14446	6.22456	10.5521	10.8752	6.03064	8.91251	4.21468	11.3349	5.10335	11.0179	8.42724	8.01369	6.32298	3.13492	8.64209	7.19723	11.5811	8.91121	5.39396	11.4926	5.98099	9.29715	12.3549	3.39512	6.48473	8.9087	9.14544	7.46474	5.62375	8.57001	9.00686	6.04103	12.6433	6.93984	4.29893	6.73123	11.3957	5.49302	7.46737	11.9115	3.74748	5.41739	9.00201	5.25679
1105	control	African	10.9489	6.46367	8.52081	10.1056	7.31889	12.262	11.5906	6.5936	8.63897	3.98658	11.7047	6.10105	11.7422	8.38565	8.72948	6.75245	3.64231	8.69903	7.28006	12.1248	9.65093	7.82077	12.4516	6.35702	9.64037	12.6391	3.49833	6.69958	10.6955	9.86692	7.69918	7.84422	9.1588	8.98274	6.70667	12.3087	6.6918	5.0904	7.12511	11.0755	5.79903	8.8659	12.1648	3.06557	5.82647	9.02365	4.17381
1106	control	African American	10.5464	6.77962	8.33036	10.227	6.30328	12.2227	11.2005	6.21159	8.8724	5.476	11.2035	5.08549	10.0571	9.06987	8.41475	5.1817	3.76821	9.17322	7.79531	12.1859	9.27417	5.83975	12.6106	7.90978	9.75521	12.466	3.89949	7.09387	8.19621	8.78459	7.76348	5.81353	9.06539	9.61317	6.44552	11.8725	7.28947	4.32093	7.33748	10.0841	5.37694	9.15356	12.0756	4.15922	5.64384	9.12474	4.83781
1107	control	African American	7.26202	7.36317	8.82461	10.3605	6.41563	11.5612	11.1339	6.64574	9.40573	4.26522	12.5089	6.08557	10.7744	9.01626	8.80753	5.18418	3.61308	9.07438	7.62479	11.8658	9.86446	5.49468	11.4419	6.52978	10.0323	12.545	4.03213	7.49489	9.79812	9.4489	7.98251	6.18909	9.12145	9.91303	7.12434	13.0575	7.24859	4.96761	7.84771	11.2461	5.90356	7.86894	12.5335	4.06934	5.81094	9.13521	5.06814
1108	control	African	9.42604	7.00299	9.22146	10.3996	7.56828	12.158	11.3375	6.27194	9.49843	4.80223	11.5845	7.38416	10.3134	8.85499	10.7607	6.64081	4.24853	9.33826	8.07436	12.3895	10.3746	7.37074	12.3845	6.798	10.1207	12.6246	4.23342	6.47393	9.40035	9.70901	7.91094	6.58812	9.66514	9.58089	7.26473	12.881	7.86232	5.82635	7.20383	11.0503	6.18313	8.45684	12.3827	3.58708	6.09403	9.63994	4.96633
1109	case	African	13.9974	5.86957	10.6591	7.67387	7.08507	12.8122	10.9223	6.33807	8.42918	8.4527	10.6592	5.44046	10.1628	7.0401	7.74827	4.76811	3.36173	8.50951	7.71071	12.3595	8.29754	6.27441	11.7269	8.0131	7.38299	12.1256	3.2891	4.93975	8.29441	10.9552	7.18386	6.5504	8.6032	9.77505	6.08188	9.18084	6.74478	5.07181	6.25141	10.5258	5.04017	12.1974	11.9782	2.95545	6.18461	8.88146	3.432
1110	control	European American	10.7171	6.54405	8.60798	9.36316	6.55924	11.2918	11.2738	6.01682	9.01593	3.65638	11.8821	5.73443	10.0679	8.69191	8.23816	6.21705	3.87721	9.0764	7.62372	11.9921	9.7331	7.58949	11.0383	6.98432	10.0198	12.6231	4.66587	6.66855	9.08899	9.83451	7.52299	5.82509	9.00824	9.3831	6.63681	12.5089	6.82981	4.34791	6.84062	10.9772	5.54018	8.68644	12.5362	3.83302	5.71432	9.20854	4.81921
1111	control	African	10.4161	5.55548	8.63489	10.1698	7.32599	12.3275	11.1763	5.42694	8.30077	3.83437	10.5058	5.57228	10.7738	8.18893	6.41643	4.92086	3.61047	8.13939	7.74826	12.1677	8.76574	6.03404	11.3756	7.24315	10.1175	12.5877	3.30663	6.91834	9.68109	10.7232	7.53993	4.82323	7.66024	8.84651	6.28329	12.8482	6.69657	4.63834	6.07874	10.6873	5.19332	8.8616	11.9572	2.93975	5.46967	8.57293	3.89004
1112	case	European American	8.96542	6.73659	8.26513	9.28303	6.20874	11.006	11.0286	6.17778	9.25885	3.95733	11.9595	5.98803	10.3709	8.50273	9.06551	5.25469	3.52546	9.11334	7.15761	11.4814	9.40542	6.32008	10.818	7.32118	9.42238	12.4015	4.07233	6.26441	7.99992	8.95042	7.75835	5.52361	8.75025	9.69543	6.91395	12.9124	7.00073	5.0578	7.25545	11.8731	5.40869	8.4244	12.3553	3.70419	6.31975	9.00638	5.00787
1113	control	European American	13.9108	6.91719	8.34541	9.60364	6.64629	12.1551	10.988	9.24164	8.94636	4.07135	11.3793	5.93348	9.40678	8.87335	8.85326	4.98478	3.55306	8.81014	7.90858	12.4982	9.77379	7.62036	10.6159	7.87175	10.0824	12.6338	3.99881	6.50786	8.82478	9.88805	7.71463	5.23751	8.77502	9.24357	6.82927	13.091	6.56521	4.84266	6.72581	11.7062	5.61161	7.7285	12.048	3.80548	5.63183	9.10325	5.09289
1114	control	African	10.5702	7.46284	9.94371	9.21506	8.05595	11.8834	11.1188	6.09311	8.7864	3.98771	10.8514	6.01625	11.597	8.17332	9.69228	5.72388	3.87038	9.2145	7.90573	12.0574	9.96013	10.2838	12.0989	8.17678	9.8159	12.5933	3.98263	6.92309	8.40007	12.3988	7.6142	5.98502	9.48228	9.24706	7.65118	9.86523	7.24573	5.89006	6.81523	11.1015	6.55847	10.5528	11.9487	3.07473	6.55351	8.97127	4.27642
1115	case	European American	6.82747	5.81584	8.4799	9.82587	6.32562	12.0689	11.3244	6.47533	8.68513	3.01157	11.9428	4.91071	9.62177	8.672	6.93452	4.80957	3.20848	8.49612	7.80196	11.7162	9.56554	5.03097	11.187	7.29066	9.78447	12.366	2.89474	6.62188	8.43959	9.20787	7.1718	5.2164	8.28826	9.4095	5.85668	12.4343	6.56728	3.8796	6.39518	10.5958	5.14588	7.59876	11.8493	3.56743	5.27507	8.87046	4.11626
1116	control	African	6.7253	6.23313	9.11735	8.83942	7.25006	11.59	11.1214	6.56726	8.71554	3.75043	10.8984	5.64501	10.5523	8.34624	8.57754	5.47475	4.09208	9.30077	8.01896	11.7295	9.95007	7.44045	11.8405	6.06287	9.7672	12.5901	3.76808	6.69304	8.99655	8.60435	7.54237	6.36475	8.55363	8.74466	6.39119	10.0043	7.65474	4.54919	6.65521	10.0645	5.35003	6.98124	11.8202	3.43181	5.57091	8.85635	4.72
1117	control	African	9.08446	6.4831	8.67547	10.3632	7.59041	12.7543	11.5207	6.65199	9.05865	4.56826	11.8772	6.54092	11.6349	8.61039	9.63974	6.48875	4.11262	9.20601	7.83204	12.2869	9.81844	9.37453	12.7213	7.24103	10.0919	12.6521	3.8568	7.27705	9.58263	10.6139	7.63489	5.95423	8.88871	9.30247	6.81196	12.7481	7.15871	5.24623	7.0792	11.1737	6.22025	9.12429	12.0868	3.47471	5.74271	9.34489	4.24222
1118	case	African	15.178	7.55113	9.68914	7.42749	7.13393	12.0253	10.4043	6.72105	9.57065	9.8519	14.5379	6.45648	11.1839	7.79967	10.7331	5.51206	4.21762	9.51255	7.25815	13.3127	9.63867	7.79969	13.0908	8.23054	8.78043	12.6062	4.49013	6.65759	7.83586	11.2801	7.55806	6.3486	9.77739	9.74497	6.77681	10.8098	7.43125	5.86925	7.19481	11.4501	5.68993	12.3279	12.7415	3.98782	5.71941	9.40621	5.19255
1119	case	African	10.9944	8.26292	10.7025	7.48128	8.03326	12.4792	10.6944	5.98512	9.05644	5.50215	10.9873	7.51972	9.35798	6.84723	10.5127	4.91228	2.55257	9.7441	7.53683	12.4755	9.71782	7.48394	10.2464	6.76942	7.31209	11.8704	6.14914	4.93878	8.33431	11.1767	6.12765	6.8668	10.1452	9.40604	7.72177	9.08494	6.23325	5.36775	7.3123	10.446	6.75917	9.58446	12.2267	3.43266	4.81084	8.90002	5.63293
1120	case	European American	7.85316	6.42395	8.42152	8.48356	6.34051	9.63721	10.767	7.56224	8.7886	5.58754	12.1897	5.08649	10.5926	8.76073	8.8253	4.67325	3.13952	8.59544	7.71507	11.7344	10.0359	4.35339	10.1894	5.38915	9.36931	12.4723	3.69876	6.06057	9.04395	9.18117	7.20262	5.71527	8.20842	9.10511	5.6357	13.1364	7.24001	4.41419	7.15726	11.0929	5.24618	7.17656	12.0338	3.5964	5.30582	8.73844	4.73168
1121	case	African American	7.3827	6.36168	8.5113	9.03127	6.54987	9.85204	10.3656	6.32134	8.67677	3.86082	11.2826	5.38037	8.90861	8.88876	7.46274	4.40499	4.09747	8.83481	7.60854	11.6689	9.56472	4.90869	11.4852	5.33071	9.46451	12.319	4.05963	6.32782	8.92868	8.90145	7.13224	5.06915	8.65284	9.20475	6.44252	13.1058	7.62699	4.39858	7.12422	10.1966	5.6696	6.63151	11.9252	3.88964	5.71089	9.19431	4.98904
1122	control	African	10.9068	6.39654	8.63742	9.61694	6.49349	11.9078	11.1379	6.03594	8.42147	4.21708	10.6409	6.14067	9.64267	8.37496	7.87399	5.04788	3.86945	8.7201	7.68542	11.9094	8.506	8.54763	11.9796	6.59203	9.59901	12.573	3.62919	7.10154	9.06696	10.0687	7.46454	5.88053	8.78971	9.10439	6.54609	12.049	6.89698	5.37085	6.37816	9.91275	6.09465	8.60209	11.6938	3.09378	5.35252	8.66484	3.90657
1125	control	European American	8.62857	6.61911	8.80555	9.0598	7.06495	10.3037	11.2849	7.47562	9.46678	3.30257	12.5981	5.19687	10.3003	9.02767	8.00551	4.44634	4.38392	9.0071	8.20646	11.9691	10.5678	7.29334	10.8216	6.73842	10.3196	12.7157	3.84814	7.32381	9.11123	9.76643	7.74431	5.92398	8.78261	9.36749	6.43924	13.723	7.63407	5.52378	7.15081	11.5869	5.05278	7.51728	12.1442	4.50229	5.91111	9.48718	4.81334
1127	control	African American	13.3055	6.02468	8.77031	9.44029	6.78932	11.9621	11.1868	6.78834	8.85439	4.09024	11.6006	5.3124	10.3783	8.71269	9.14353	4.98581	3.68446	8.49286	7.76337	12.0859	9.39958	6.44238	11.7708	7.68729	9.82071	12.583	3.58977	6.84772	9.40571	11.1598	7.41202	5.0414	8.26861	8.99403	5.97241	12.8977	7.23789	4.17538	6.10466	10.6727	5.40877	8.11695	11.9296	3.41011	5.68071	9.01449	4.3488
1128	case	European American	7.20595	6.05525	8.36226	9.35651	6.41679	10.3049	11.0434	7.07181	8.60458	4.54373	11.5483	5.52924	10.2738	7.9901	7.23935	4.68002	3.91185	8.79065	7.70029	11.5704	10.0974	5.00286	11.2683	6.5894	9.44625	12.5141	3.15638	6.34241	9.1366	8.67869	7.17675	5.10442	8.25912	9.2744	5.77278	13.142	6.67711	4.60582	6.47002	9.86976	5.00942	6.66436	11.8535	3.36898	5.1658	8.57536	3.77727
1129	control	African	8.47431	6.06021	9.13132	9.18512	7.43431	10.2438	11.3368	7.13586	8.9026	4.65288	11.7467	6.43024	9.75977	8.69062	9.36479	5.61876	4.67514	9.12323	8.0106	11.45	10.1835	8.5809	12.794	5.7705	9.80142	12.6905	3.76429	6.89954	8.75347	9.58333	7.65175	5.96785	9.38759	9.68841	6.86576	13.5151	7.61533	5.2985	6.69837	10.8198	5.81524	7.49641	12.3587	3.51552	6.20335	9.29148	3.84826
1131	control	African	10.8057	7.17117	8.64506	9.54826	7.52636	12.0687	10.9599	6.20088	9.19807	4.76051	11.3165	6.93684	10.503	8.85426	9.60443	5.41336	4.57353	9.20986	7.47952	11.9919	10.2707	7.78169	12.6352	6.59985	10.0188	12.4981	4.40684	6.64345	9.5468	10.2654	7.80082	6.11079	9.33955	8.73372	7.16939	12.5446	7.56405	5.5274	6.56947	11.2369	6.40666	8.55527	12.4142	3.88932	5.67166	9.29379	5.33792
1132	case	European American	7.13182	5.75214	8.55537	5.87413	6.04213	6.39253	10.2154	6.81216	8.58267	3.6701	11.8025	4.34143	8.66968	8.59846	7.26533	4.39819	3.69862	8.67825	8.02153	11.3018	9.95294	5.79622	9.42508	5.3797	9.81165	12.3649	3.44652	6.71448	7.44772	8.39197	7.41422	5.15722	7.73817	8.80885	5.74619	12.8904	7.01368	3.69605	6.51603	11.1715	4.9155	6.2912	11.4282	3.11174	5.40312	8.93186	4.38946
1133	case	European American	14.4065	6.61787	8.7465	9.73982	6.72892	11.9887	11.1277	6.05866	8.76448	5.5678	11.8381	5.15609	9.35132	8.48768	7.40796	5.23225	4.22721	8.8212	7.74579	12.4075	9.80581	5.34385	11.1898	8.24885	9.99109	12.4167	3.94367	6.996	8.52598	10.2061	7.34863	5.56005	8.60857	9.81426	6.0631	12.186	6.77821	4.57326	6.36746	11.0177	5.63163	10.4636	11.7588	4.033	5.52319	9.23861	5.9063
1134	case	African	12.7554	5.62797	10.0494	7.27363	6.18206	13.1428	11.043	3.34872	8.14566	4.78504	9.36314	3.46635	6.58649	7.85243	6.29973	5.3521	3.04029	10.0664	6.24421	12.2714	9.13206	5.42991	8.29986	7.60894	5.83456	11.2927	3.67092	3.86516	6.53373	7.363	3.60315	5.18082	8.59709	10.3349	6.346	8.67243	3.91957	3.44911	6.17723	8.99054	6.02982	5.16305	8.0561	2.16063	2.81081	8.30714	3.41606
1135	case	African American	10.0128	8.49648	8.90062	9.92842	7.61811	11.185	10.8278	7.096	11.0058	6.37159	11.787	6.06291	8.76933	8.49611	9.81212	6.03967	3.98199	9.88942	7.51483	13.8724	9.51219	6.72868	12.6032	7.6744	9.59436	12.5817	4.54479	7.11334	9.10523	10.0516	8.04838	7.15391	10.6847	10.4802	6.61192	12.8619	8.35973	5.0701	8.92301	11.8946	7.15192	9.71871	12.6928	5.95214	6.22384	9.74034	6.02539
[truncated: 1,790 more rows]
[truncated: 35 more columns]
